# Supplementary material for: Microbial and chemical dynamics of a toxic dinoflagellate bloom
Source: PeerJ journal article supplement (doi:10.7717/peerj.9493), 2020-07-21
Supplement: FigS1.pdf [file FigS1.pdf]

A.

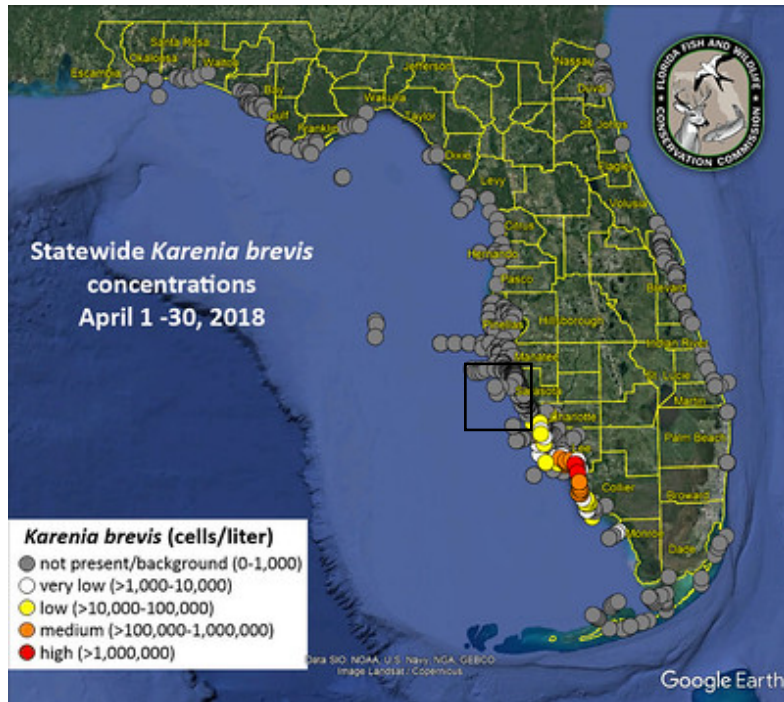

B.

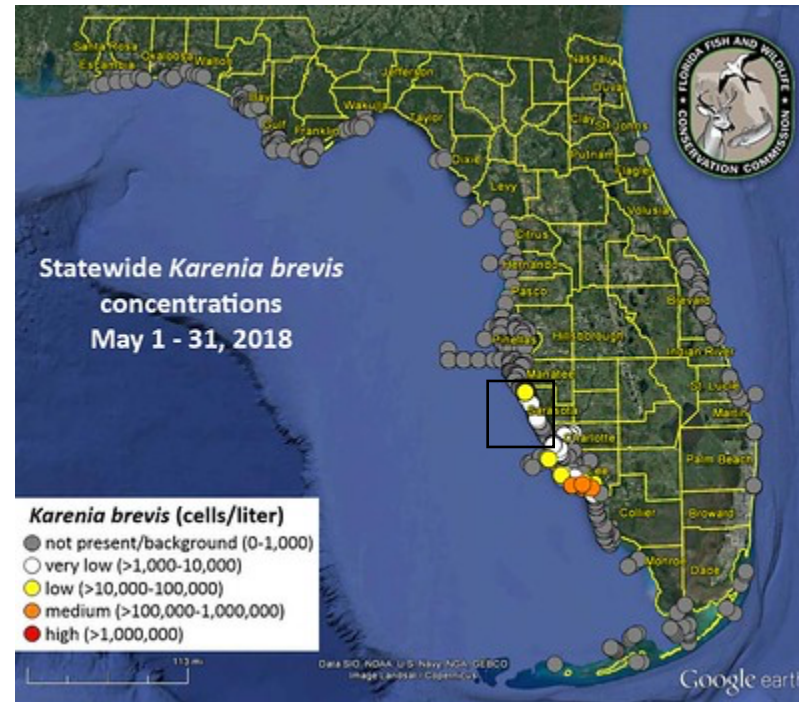

C.

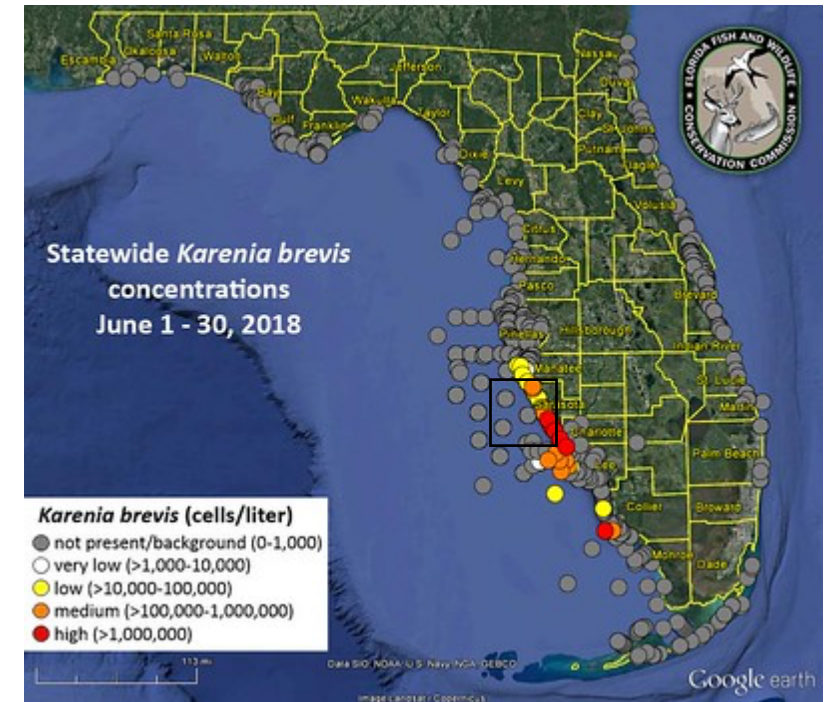

Supplementary Figure 1. *Karenia brevis* cell counts during April (A), May (B), and June (C) 2018 show June represented a renewed surge in bloom conditions in the sampling area (black box). Maps were provided by the Florida Fish and Wildlife Conservation Commission (FWWC) archive of HAB monitoring data (<https://www.flickr.com/photos/myfwc/sets/72157635398013168/with/42439280324/>). Data sources: Scripps Institution of Oceanography, National Oceanic and Atmospheric Administration, U.S. Navy, National Geospatial-Intelligence Agency, GEBCO Image Landsat/Copernicus, Google Earth.
