# Supplementary material for: Microbial and chemical dynamics of a toxic dinoflagellate bloom
Source: PeerJ. 2020 Jul 21;8:e9493. doi: 10.7717/peerj.9493 (PMC7676380; doi:10.7717/peerj.9493)
Supplement: Supplemental Information 6 [file peerj-08-9493-s006.xlsx]

## Sheet: S1
Sample	Site	Date sampled	Site description	Latitude Longitude	Filter pore size (µm)	Reads (QC'd)	Reads (post-Deblur)	NCBI BioSample #
S1-002	1	June 8 2018	Dock off inner Sarasota Bay (Mote Marine Laboratory)	27.332 N 82.57586 W	0.2	42219	30157	SAMN11333281
S1-030	1	June 8 2018	Dock off inner Sarasota Bay (Mote Marine Laboratory)	27.332 N 82.57586 W	3	15024	8074	SAMN11333282
S1-30	1	June 8 2018	Dock off inner Sarasota Bay (Mote Marine Laboratory)	27.332 N 82.57586 W	30	10961	4348	SAMN11333283
S2-002	2	June 8 2018	Dock in Sarasota Bay pass	27.3335 N 82.57586 W	0.2	32840	23216	SAMN11333284
S2-030	2	June 8 2018	Dock in Sarasota Bay pass	27.3335 N 82.57586 W	3	21393	12615	SAMN11333285
S3-002	3	June 8 2018	Beach at the northeastern tip of Anna Maria Island	27.5342 N 82.73383 W	0.2	20767	14768	SAMN11333286
S3-030	3	June 8 2018	Beach at the northeastern tip of Anna Maria Island	27.5342 N 82.73383 W	3	27064	17626	SAMN11333287
S4-002	4	June 8 2018	Holmes Beach, ocean-facing	27.4965 N 82.71237 W	0.2	36938	26460	SAMN11333288
S4-030	4	June 8 2018	Holmes Beach, ocean-facing	27.4965 N 82.71237 W	3	32092	20888	SAMN11333289
S5-002	5	June 8 2018	Jetty, seagrass bottom, inner Sarasota Bay	27.4656 N 82.69605 W	0.2	45201	32814	SAMN11333290
S5-030	5	June 8 2018	Jetty, seagrass bottom, inner Sarasota Bay	27.4656 N 82.69605 W	3	15308	9343	SAMN11333291
S5-30	5	June 8 2018	Jetty, seagrass bottom, inner Sarasota Bay	27.4656 N 82.69605 W	30	27884	9889	SAMN11333292
S6-002	6	June 8 2018	Beach south of Longboat Pass, ocean-facing	27.4341 N 82.68696 W	0.2	24137	17182	SAMN11333293
S6-030	6	June 8 2018	Beach south of Longboat Pass, ocean-facing	27.4341 N 82.68696 W	3	19841	12889	SAMN11333294
S6-30	6	June 8 2018	Beach south of Longboat Pass, ocean-facing	27.4341 N 82.68696 W	30	66447	29053	SAMN11333295
S7-002	7	June 9 2018	Beach on Long Key, ocean-facing	27.7212 N 82.74147 W	0.2	31634	21033	SAMN11333296
S7-030	7	June 9 2018	Beach on Long Key, ocean-facing	27.7212 N 82.74147 W	3	13960	8999	SAMN11333297
S7-30	7	June 9 2018	Beach on Long Key, ocean-facing	27.7212 N 82.74147 W	30	27606	12190	SAMN11333298
S8-002	8	June 9 2018	Dock in Pass-a-Grille channel	27.6957 N 82.73551 W	0.2	38930	28281	SAMN11333299
S8-030	8	June 9 2018	Dock in Pass-a-Grille channel	27.6957 N 82.73551 W	3	35727	22157	SAMN11333300
S8-30	8	June 9 2018	Dock in Pass-a-Grille channel	27.6957 N 82.73551 W	30	14183	5525	SAMN11333301
S9-002	9	June 9 2018	Beach in Pass-a-Grille, ocean-facing	27.691 N 82.73814 W	0.2	41021	29609	SAMN11333302
S9-030	9	June 9 2018	Beach in Pass-a-Grille, ocean-facing	27.691 N 82.73814 W	3	15183	9673	SAMN11333303
S9-30	9	June 9 2018	Beach in Pass-a-Grille, ocean-facing	27.691 N 82.73814 W	30	23411	10892	SAMN11333304
S10-002	10	June 9 2018	Dock in Cunningham Key, semi-sheltered by keys	27.655 N 82.71816 W	0.2	34939	25724	SAMN11333305
S10-030	10	June 9 2018	Dock in Cunningham Key, semi-sheltered by keys	27.655 N 82.71816 W	3	22122	13865	SAMN11333306
S10-30	10	June 9 2018	Dock in Cunningham Key, semi-sheltered by keys	27.655 N 82.71816 W	30	25949	9593	SAMN11333307
S11-002	11	June 9 2018	Dock in Tierra Shores, Tampa Bay-facing	27.6811 N 82.72009 W	0.2	44822	33394	SAMN11333308
S11-030	11	June 9 2018	Dock in Tierra Shores, Tampa Bay-facing	27.6811 N 82.72009 W	3	42697	26053	SAMN11333309
S11-30	11	June 9 2018	Dock in Tierra Shores, Tampa Bay-facing	27.6811 N 82.72009 W	30	33857	10351	SAMN11333310
S12-002	12	June 9 2018	Marine Harbour, sheltered	27.7235 N 82.68233 W	0.2	31530	22136	SAMN11333311
S12-030	12	June 9 2018	Marine Harbour, sheltered	27.7235 N 82.68233 W	3	92	--	n/a
S12-30	12	June 9 2018	Marine Harbour, sheltered	27.7235 N 82.68233 W	30	22499	4740	SAMN11333312

## Sheet: S2-chloroplasts
Table S2: All species of phytoplankton and plant identified by the PhytoRef database from the 16S rRNA gene amplicons initially classified as chloroplasts by SILVA.
													Sample
			Taxonomy Level										0.2 - 3.0 µm												3.0 - 30 µm												>30 µm
Amplicon_ID	PhytoRef_ID	%Identity	1	2	3	4	5	6	7	8	9	10	S1	S2	S3	S4	S5	S6	S7	S8	S9	S10	S11	S12	S1	S2	S3	S4	S5	S6	S7	S8	S9	S10	S11	S12	S1	S5	S6	S7	S8	S9	S10	S11	S12	Total
dfba3664d019038743ca33ce4c5bff71	7961#JN976404	99.203	Eukaryota	Stramenopiles	Ochrophyta	Bacillariophyta	Bacillariophyceae	Bacillariales	Bacillariales_X	Bacillariaceae	Bacillariaceae_X	Bacillariaceae_X sp.	3	0	0	0	4	0	2	0	2	2	1	3	5	17	12	28	12	3	1	12	6	1	3	0	12	38	33	0	2	0	0	0	0	202
1d55aced8cd1c9a1acc8d57e4e126b1b	7818#KC001366	99.602	Eukaryota	Stramenopiles	Ochrophyta	Bacillariophyta	Bacillariophyceae	Bacillariophyceae_X	Bacillariophyceae_XX	Bacillariophyceae_XXX	Bacillariophyceae_XXXX	Bacillariophyceae_XXXX sp.	0	0	0	0	1	0	0	0	0	0	0	0	0	55	0	16	0	11	0	0	0	0	0	0	0	13	449	0	0	0	0	0	0	545
9575fab9d9e9f6b09adbef7b2956aa6f	6810#KC001625	100	Eukaryota	Stramenopiles	Ochrophyta	Bacillariophyta	Bacillariophyceae	Bacillariophyceae_X	Bacillariophyceae_XX	Bacillariophyceae_XXX	Bacillariophyceae_XXXX	Bacillariophyceae_XXXX sp.	0	0	0	0	0	0	0	0	0	0	0	0	0	0	0	0	0	0	5	1	6	0	0	0	0	0	0	71	0	48	0	0	0	131
3340558385bb1e8aa87a638fe716da95	6691#GU940795	100	Eukaryota	Stramenopiles	Ochrophyta	Bacillariophyta	Bacillariophyta_X	Bacillariophyta_XX	Bacillariophyta_XXX	Bacillariophyta_XXXX	Bacillariophyta_XXXXX	Bacillariophyta_XXXXX sp.	0	0	0	0	0	0	0	0	0	0	0	0	6	4	0	0	0	0	0	0	0	0	0	0	13	0	0	0	0	0	0	0	0	23
a68a35aef14d20aeaf44ebeb89b83671	7222#JQ013153	100	Eukaryota	Stramenopiles	Ochrophyta	Bacillariophyta	Bacillariophyta_X	Bacillariophyta_XX	Bacillariophyta_XXX	Bacillariophyta_XXXX	Bacillariophyta_XXXXX	Bacillariophyta_XXXXX sp.	0	0	0	0	0	0	0	0	0	0	0	0	1	7	0	2	0	2	4	59	4	0	63	0	3	0	0	3	4	0	31	50	0	233
b1ad8e9f364ab8bbd211199b3ce0d3c8	7222#JQ013153	99.602	Eukaryota	Stramenopiles	Ochrophyta	Bacillariophyta	Bacillariophyta_X	Bacillariophyta_XX	Bacillariophyta_XXX	Bacillariophyta_XXXX	Bacillariophyta_XXXXX	Bacillariophyta_XXXXX sp.	0	0	0	0	0	0	0	0	0	0	0	2	0	1	0	0	0	0	0	0	0	0	0	0	0	0	0	0	0	0	0	0	0	3
6348472098179cbab86e8eca717ec839	44#FJ002166	98.805	Eukaryota	Stramenopiles	Ochrophyta	Bacillariophyta	Coscinodiscophyceae	Chaetocerotales	Chaetocerotales_X	Chaetocerotaceae	Bacteriastrum	Bacteriastrum hyalinum	0	0	0	0	0	0	0	0	0	0	0	0	0	0	0	0	0	0	0	0	0	0	0	0	0	0	59	0	0	0	0	0	0	59
a40d8a06982deb69bd44805d0309ac06	8013#GU061468	99.203	Eukaryota	Hacrobia	Haptophyta	Prymnesiophyceae	Prymnesiophyceae_X	Prymnesiophyceae_XX	Prymnesiophyceae_XXX	Braarudosphaeraceae	Braarudosphaeraceae_X	Braarudosphaeraceae_X sp.	0	0	0	0	0	0	0	0	0	0	0	0	5	4	3	2	3	2	2	10	0	0	5	0	0	4	33	10	0	6	5	4	0	98
c1b6d56025ffb918d7e148fac768db96	5145#JN207219	99.6	Eukaryota	Stramenopiles	Ochrophyta	Bacillariophyta	Coscinodiscophyceae	Chaetocerotales	Chaetocerotales	Chaetocerotaceae	Chaetoceros	Chaetoceros sp.	0	0	0	0	0	0	0	0	0	0	0	0	3	0	0	0	0	0	0	0	0	0	0	0	48	0	0	8	9	0	18	0	0	86
804c69794bd5c663fd56f2540984aa90	4990#JN207220	100	Eukaryota	Stramenopiles	Ochrophyta	Bacillariophyta	Coscinodiscophyceae	Chaetocerotales	Chaetocerotales	Chaetocerotaceae	Chaetoceros	Chaetoceros sp.	4	0	0	0	3	0	2	0	0	0	0	0	16	1	10	0	29	2	0	3	10	0	0	0	3	273	333	0	0	0	0	0	0	689
a54e453b70f7f6f1e160f1710a084f25	4990#JN207220	99.602	Eukaryota	Stramenopiles	Ochrophyta	Bacillariophyta	Coscinodiscophyceae	Chaetocerotales	Chaetocerotales	Chaetocerotaceae	Chaetoceros	Chaetoceros sp.	0	0	0	0	0	0	1	0	0	1	12	6	0	0	0	0	0	0	11	138	11	0	212	0	0	0	0	0	0	0	0	300	0	692
6360d30ceeef5db8aaf61a8318477dcb	4980#JN207230	100	Eukaryota	Stramenopiles	Ochrophyta	Bacillariophyta	Coscinodiscophyceae	Chaetocerotales	Chaetocerotales	Chaetocerotaceae	Chaetoceros	Chaetoceros sp.	0	0	0	0	3	2	0	0	1	0	0	0	0	0	0	0	0	13	0	0	7	0	0	0	0	534	1040	51	0	16	0	0	0	1667
e3457160e177e7fb98aec65668c7eedf	5017#JN207225	99.602	Eukaryota	Stramenopiles	Ochrophyta	Bacillariophyta	Coscinodiscophyceae	Chaetocerotales	Chaetocerotales	Chaetocerotaceae	Chaetoceros	Chaetoceros sp.	28	0	0	0	7	0	11	7	7	4	11	3	95	84	77	0	120	60	116	238	122	200	439	0	706	1198	2597	1792	199	1005	1869	1628	218	12841
37da8eaae4a0fbce145d5d3cf6909ee7	4980#JN207230	99.602	Eukaryota	Stramenopiles	Ochrophyta	Bacillariophyta	Coscinodiscophyceae	Chaetocerotales	Chaetocerotales	Chaetocerotaceae	Chaetoceros	Chaetoceros sp.	4	7	0	0	7	0	0	0	0	0	0	0	121	357	82	4	100	62	7	37	2	8	28	2	625	1752	2677	68	73	31	95	63	0	6212
12884d07ff4992924957d28ebe7f8f8d	7828#JQ013176	99.203	Eukaryota	Stramenopiles	Ochrophyta	Bacillariophyta	Coscinodiscophyceae	Chaetocerotales	Chaetocerotales_X	Chaetocerotaceae	Chaetocerotaceae_X	Chaetocerotaceae_X sp.	0	0	0	0	0	0	0	0	0	0	0	0	0	25	0	0	0	0	0	0	0	0	0	0	31	110	100	0	0	0	0	0	0	266
a4cf0bffdce242cba9ed864c960e1f94	7828#JQ013176	100	Eukaryota	Stramenopiles	Ochrophyta	Bacillariophyta	Coscinodiscophyceae	Chaetocerotales	Chaetocerotales_X	Chaetocerotaceae	Chaetocerotaceae_X	Chaetocerotaceae_X sp.	0	0	0	0	0	0	0	0	0	0	0	3	0	0	0	0	0	0	0	0	0	0	0	0	0	0	0	0	0	0	0	0	605	608
0d273cfbfac3d8b009e5c16c6d4854b4	6292#GQ347794	99.602	Eukaryota	Stramenopiles	Ochrophyta	Bacillariophyta	Coscinodiscophyceae	Chaetocerotales	Chaetocerotales_X	Chaetocerotaceae	Chaetocerotaceae_X	Chaetocerotaceae_X sp.	8	0	0	0	6	0	3	3	8	16	11	18	52	8	88	143	20	52	26	128	49	523	365	0	210	404	475	219	54	322	2980	454	3150	9795
8034b7a9765d29b5a21af7a7247efd97	6697#GU061466	100	Eukaryota	Stramenopiles	Ochrophyta	Bacillariophyta	Coscinodiscophyceae	Chaetocerotales	Chaetocerotales	Chaetocerotaceae	Chaetocerotaceae_X	Chaetocerotaceae_X sp.	3	0	0	0	0	0	0	0	0	0	0	0	5	0	0	0	0	0	0	0	0	0	0	0	44	0	0	0	0	0	0	40	0	92
360429a26fcf507b17ed4a5baeeea29a	6697#GU061466	99.602	Eukaryota	Stramenopiles	Ochrophyta	Bacillariophyta	Coscinodiscophyceae	Chaetocerotales	Chaetocerotales	Chaetocerotaceae	Chaetocerotaceae_X	Chaetocerotaceae_X sp.	0	0	0	0	0	0	0	0	0	0	0	0	0	9	0	0	2	0	0	0	0	0	0	0	0	10	0	0	0	0	0	0	0	21
f9cbec1119e7801c9b866f7dd64ae070	7893#GQ472819	99.602	Eukaryota	Stramenopiles	Ochrophyta	Bacillariophyta	Coscinodiscophyceae	Chaetocerotales	Chaetocerotales_X	Chaetocerotaceae	Chaetocerotaceae_X	Chaetocerotaceae_X sp.	2	0	0	0	2	0	0	1	0	0	0	1	4	20	6	0	22	16	20	36	18	47	12	0	96	77	0	300	59	128	210	32	0	1109
289529c9f93c87c96a68dd6140e622e6	6300#JF495297	99.203	Eukaryota	Stramenopiles	Ochrophyta	Bacillariophyta	Coscinodiscophyceae	Chaetocerotales	Chaetocerotales	Chaetocerotaceae	Chaetocerotaceae_X	Chaetocerotaceae_X sp.	0	0	0	0	0	0	0	0	0	0	0	0	7	0	0	0	6	0	0	0	0	0	0	0	0	0	0	0	0	0	0	0	0	13
1b221ee4402108240df584122a7a57c8	7893#GQ472819	100	Eukaryota	Stramenopiles	Ochrophyta	Bacillariophyta	Coscinodiscophyceae	Chaetocerotales	Chaetocerotales_X	Chaetocerotaceae	Chaetocerotaceae_X	Chaetocerotaceae_X sp.	0	0	0	0	1	0	2	0	2	0	0	0	24	0	0	0	13	0	2	0	0	8	0	0	21	143	524	267	459	90	80	25	40	1701
d3edfa284848db5925ee411d6d40ebcb	7724#AY948053	97.211	Eukaryota	Stramenopiles	Ochrophyta	Chrysophyceae	Chrysophyceae_X	Chromulinales	Chromulinales_X	Chromulinaceae	Chromulinaceae_X	Chromulinaceae_X sp.	0	0	0	0	0	0	0	0	0	0	0	0	16	8	0	0	9	0	0	3	0	7	0	0	0	2	2	0	0	0	2	3	0	52
9ba8937470b85f07d2acddec333bf545	6459#U70724	99.203	Eukaryota	Hacrobia	Cryptophyta	Cryptophyceae	Cryptophyceae_X	Pyrenomonadales	Pyrenomonadales_X	Chroomonadaceae	Chroomonadaceae_X	Chroomonadaceae_X sp.	0	0	0	0	0	0	0	0	0	0	0	0	5	2	10	11	1	3	0	2	0	0	14	0	0	4	0	0	0	0	0	2	0	54
585f949cfb51aa4cff952c244267d1d2	710#	100	Eukaryota	Hacrobia	Haptophyta	Prymnesiophyceae	Prymnesiophyceae_X	Prymnesiales	Prymnesiales_X	Chrysochromulinaceae	Chrysochromulina	Chrysochromulina camella	0	0	0	0	0	0	0	0	0	0	0	0	15	18	3	7	0	14	2	24	7	13	12	0	0	3	9	9	2	11	2	1	2	154
ceeea7ef099dce78770376a452d8bb43	7995#EF575192	99.2	Eukaryota	Hacrobia	Haptophyta	Prymnesiophyceae	Prymnesiophycidae_X	Prymnesiales	Prymnesiales_X	Chrysochromulinaceae	Chrysochromulinaceae_X	Chrysochromulinaceae_X sp.	0	0	0	0	0	0	0	0	0	0	0	0	1	3	0	3	0	0	0	0	0	1	4	0	0	0	1	0	0	0	0	0	0	13
4bf982493dc1593224a2cfc61b3e9a24	6273#EF574473	100	Eukaryota	Hacrobia	Haptophyta	Prymnesiophyceae	Prymnesiophycidae_X	Prymnesiales	Prymnesiales_X	Chrysochromulinaceae	Chrysochromulinaceae_X	Chrysochromulinaceae_X sp.	0	0	0	0	0	0	0	0	0	0	0	0	0	11	0	5	0	0	0	0	0	0	0	0	0	0	0	0	0	0	0	0	0	16
aa8392feebe029dad0deb0f8bce8a3fc	7846#EF574861	98.805	Eukaryota	Hacrobia	Haptophyta	Prymnesiophyceae	Prymnesiophycidae_X	Prymnesiales	Prymnesiales_X	Chrysochromulinaceae	Chrysochromulinaceae_X	Chrysochromulinaceae_X sp.	0	0	0	0	0	0	0	0	0	0	0	0	4	8	8	16	1	0	6	4	0	6	0	0	0	0	10	2	0	0	2	0	0	67
44cd557d3840f832f42193dea43b8f0c	6943#FJ826341	99.602	Eukaryota	Hacrobia	Haptophyta	Prymnesiophyceae	Prymnesiophycidae_X	Prymnesiales	Prymnesiales_X	Chrysochromulinaceae	Chrysochromulinaceae_X	Chrysochromulinaceae_X sp.	0	0	0	0	0	0	0	0	0	0	0	0	11	1	0	0	1	2	8	16	1	8	0	0	0	0	5	0	0	0	6	0	0	59
22e963adff481b4fbe21b5b9364043d1	6943#FJ826341	100	Eukaryota	Hacrobia	Haptophyta	Prymnesiophyceae	Prymnesiophycidae_X	Prymnesiales	Prymnesiales_X	Chrysochromulinaceae	Chrysochromulinaceae_X	Chrysochromulinaceae_X sp.	0	0	0	0	0	0	0	0	0	0	0	0	9	0	0	0	0	0	0	1	2	3	0	0	0	0	0	0	0	0	1	0	0	16
6b5d12687249b892a6091038d90d2dae	7626#EU804830	97.211	Eukaryota	Hacrobia	Haptophyta	Prymnesiophyceae	Prymnesiophycidae_X	Prymnesiales	Prymnesiales_X	Chrysochromulinaceae	Chrysochromulinaceae_X	Chrysochromulinaceae_X sp.	0	0	0	0	0	0	0	0	0	0	0	0	7	4	4	4	3	0	5	26	2	4	9	0	0	0	0	0	0	0	0	0	2	70
3dc8e7cd60182c8237e8f63fa4054c71	7792#FJ425634	98	Eukaryota	Hacrobia	Haptophyta	Prymnesiophyceae	Prymnesiophycidae_X	Prymnesiales	Prymnesiales_X	Chrysochromulinaceae	Chrysochromulinaceae_X	Chrysochromulinaceae_X sp.	0	0	0	0	0	0	0	0	0	0	0	0	0	0	4	4	5	0	3	1	0	0	6	0	2	0	0	0	0	0	0	2	0	27
6d09a006093cc4d037bde725791ed003	6849#KC003450	99.602	Eukaryota	Stramenopiles	Ochrophyta	Chrysophyceae	Chrysophyceae_X	Chrysophyceae_XX	Chrysophyceae_XXX	Chrysophyceae_XXXX	Chrysophyceae_XXXXX	Chrysophyceae_XXXXX sp.	9	3	0	0	0	2	3	3	1	0	0	0	7	13	0	2	6	6	3	4	4	0	0	0	0	2	2	0	0	0	0	0	0	70
67b525afea299d0cd630f376c8b925cf	7788#FJ745242	99.602	Eukaryota	Stramenopiles	Ochrophyta	Chrysophyceae-Synurophyceae	Chrysophyceae-Synurophyceae_X	Chrysophyceae-Synurophyceae_XX	Chrysophyceae-Synurophyceae_XXX	Chrysophyceae-Synurophyceae_XXXX	Chrysophyceae-Synurophyceae_XXXXX	Chrysophyceae-Synurophyceae_XXXXX sp.	3	3	0	0	0	0	0	0	0	2	0	0	0	10	3	2	0	8	0	7	2	0	0	0	0	0	0	0	0	0	0	0	0	40
156b0c5c38a2751e7e7b41ad65d36d6c	7806#HM127595	100	Eukaryota	Stramenopiles	Ochrophyta	Chrysophyceae-Synurophyceae	Chrysophyceae-Synurophyceae_X	Chrysophyceae-Synurophyceae_XX	Chrysophyceae-Synurophyceae_XXX	Chrysophyceae-Synurophyceae_XXXX	Chrysophyceae-Synurophyceae_XXXXX	Chrysophyceae-Synurophyceae_XXXXX sp.	0	0	0	2	0	0	0	0	0	0	0	0	0	2	0	2	0	4	0	0	0	0	0	0	0	0	2	0	0	0	0	0	0	12
3386f277f82687111065c6f669afbafd	7687#KC000607	98.805	Eukaryota	Stramenopiles	Ochrophyta	Chrysophyceae-Synurophyceae	Chrysophyceae-Synurophyceae_X	Chrysophyceae-Synurophyceae_XX	Chrysophyceae-Synurophyceae_XXX	Chrysophyceae-Synurophyceae_XXXX	Chrysophyceae-Synurophyceae_XXXXX	Chrysophyceae-Synurophyceae_XXXXX sp.	3	0	0	0	0	0	3	2	0	0	0	0	0	0	1	2	0	7	0	0	2	2	1	0	0	0	0	0	0	0	0	0	0	23
306c8f3c59283d9ae95c955ebcbc940d	7687#KC000607	98.406	Eukaryota	Stramenopiles	Ochrophyta	Chrysophyceae-Synurophyceae	Chrysophyceae-Synurophyceae_X	Chrysophyceae-Synurophyceae_XX	Chrysophyceae-Synurophyceae_XXX	Chrysophyceae-Synurophyceae_XXXX	Chrysophyceae-Synurophyceae_XXXXX	Chrysophyceae-Synurophyceae_XXXXX sp.	3	4	2	2	6	5	2	4	9	0	2	0	16	15	11	16	7	14	9	52	27	15	5	0	0	2	0	0	0	3	4	2	0	237
6d1e6a0dab6edc14e44652222cd10632	565#HM133058	98.305	Eukaryota	Stramenopiles	Ochrophyta	Chrysophyceae-Synurophyceae	Chrysophyceae-Synurophyceae_X	Chrysophyceae-Synurophyceae_XX	Chrysophyceae-Synurophyceae_XXX	Chrysophyceae-Synurophyceae_XXXX	Chrysophyceae-Synurophyceae_XXXXX	Chrysophyceae-Synurophyceae_XXXXX sp.	0	0	0	0	0	0	0	2	0	0	0	0	0	5	4	5	3	7	2	21	5	5	0	0	0	0	8	12	2	8	2	5	0	96
909ec93d7b1ad862be237f172c8b3f6c	3991#JN207234	100	Eukaryota	Stramenopiles	Ochrophyta	Bacillariophyta	Coscinodiscophyceae	Coscinodiscales	Coscinodiscales_X	Coscinodiscaceae	Coscinodiscus	Coscinodiscus sp.	0	0	0	0	0	0	0	0	0	0	0	0	0	3	0	4	1	0	0	0	0	0	0	0	0	0	10	0	0	0	0	0	0	18
b94104123e11da70e236762160896724	5778#EU123323	98.406	Eukaryota	Hacrobia	Cryptophyta	Cryptophyceae	Cryptophyceae_X	Pyrenomonadales	Pyrenomonadales_X	Geminigeraceae	Cryptophyta	Cryptophyta sp.	0	0	0	0	0	0	0	0	0	0	0	0	1	0	1	0	0	0	0	5	0	0	5	0	0	0	0	0	0	0	0	0	3	15
7be458f558040a7fb533fc1d8147117e	5778#EU123323	100	Eukaryota	Hacrobia	Cryptophyta	Cryptophyceae	Cryptophyceae_X	Pyrenomonadales	Pyrenomonadales_X	Geminigeraceae	Cryptophyta	Cryptophyta sp.	0	0	0	0	0	0	0	0	0	0	0	0	37	64	45	33	34	39	4	74	15	29	35	0	0	11	21	0	2	7	5	13	0	468
cd6084de8dd87a0da80417f08d8f498b	730#	100	Eukaryota	Stramenopiles	Ochrophyta	Bacillariophyta	Bacillariophyceae	Bacillariales	Bacillariales_X	Bacillariaceae	Cylindrotheca	Cylindrotheca closterium	0	0	0	0	0	0	0	0	0	0	0	1	0	0	0	0	0	0	0	10	2	0	0	0	0	0	0	0	0	0	0	0	0	13
19ecc1ba1e6a74d98c1037b2d5005ab5	7705#HQ166725	100	Eukaryota	Stramenopiles	Ochrophyta	Bacillariophyta	Coscinodiscophyceae	Cymatosirales	Cymatosirales_X	Cymatosiraceae	Cymatosiraceae_X	Cymatosiraceae_X sp.	6	0	3	7	4	2	0	0	3	0	4	0	65	139	73	174	58	49	49	113	17	34	165	0	56	227	941	125	36	109	131	293	0	2883
064577dabd6165d4b2b456bce73759eb	4955#JF277142	98.008	Eukaryota	Stramenopiles	Ochrophyta	Bacillariophyta	Bacillariophyceae	Cymbellales	Cymbellales_X	Cymbellaceae	Cymbella	Cymbella intermedia	0	0	0	0	0	0	0	0	0	0	0	0	0	2	0	0	0	7	0	0	0	0	0	0	0	0	95	0	0	0	0	0	0	104
c49c8509287927320de5fa4ee4421683	4002#JF277147	100	Eukaryota	Stramenopiles	Ochrophyta	Bacillariophyta	Bacillariophyceae	Cymbellales	Cymbellales_X	Cymbellaceae	Cymbella	Cymbella latarea	0	0	0	0	1	0	0	0	0	0	0	0	0	0	0	0	0	0	0	0	0	0	0	0	0	0	0	0	0	0	0	0	0	1
eeb89a86f92fdd2b1b2eb412808621df	6983#JF272009	100	Eukaryota	Stramenopiles	Ochrophyta	Bacillariophyta	Bacillariophyceae	Cymbellales	Cymbellales_X	Cymbellaceae	Cymbellaceae_X	Cymbellaceae_X sp.	1	0	0	0	4	0	0	0	0	0	0	0	5	14	0	0	11	1	0	0	0	3	0	0	18	83	59	0	3	0	23	0	0	225
c1557b433dc768fd9ff4258eafb849b9	6983#JF272009	96.8	Eukaryota	Stramenopiles	Ochrophyta	Bacillariophyta	Bacillariophyceae	Cymbellales	Cymbellales_X	Cymbellaceae	Cymbellaceae_X	Cymbellaceae_X sp.	0	0	0	0	0	0	5	10	7	2	0	0	0	0	0	0	0	0	0	0	0	0	0	0	0	0	0	0	0	0	0	0	0	24
77e65074ee38d24827e8de32ec32e774	7637#HM565019	99.602	Eukaryota	Stramenopiles	Ochrophyta	Bacillariophyta	Bacillariophyceae	Cymbellales	Cymbellales_X	Cymbellaceae	Cymbellaceae_X	Cymbellaceae_X sp.	0	0	0	0	0	0	0	0	0	0	0	0	0	0	0	1	0	0	0	0	0	0	0	0	0	0	0	0	0	0	0	0	0	1
b2176b89269708aa3ce7ffd28da425f0	480#FN563100	97.61	Eukaryota	Archaeplastida	Chlorophyta	Prasinophyceae	Prasinophyceae_X	Pyramimonadales	Pyramimonadales_X	Pyramimonadaceae	Cymbomonas	Cymbomonas tetramitiformis	0	0	0	0	0	0	0	0	0	0	0	0	0	0	0	0	4	0	0	0	0	6	0	0	0	0	0	0	0	0	2	0	0	12
643102a13cc6bdfbb27c40c5213cf559	480#FN563100	98.406	Eukaryota	Archaeplastida	Chlorophyta	Prasinophyceae	Prasinophyceae_X	Pyramimonadales	Pyramimonadales_X	Pyramimonadaceae	Cymbomonas	Cymbomonas tetramitiformis	0	0	0	0	0	0	0	0	0	0	0	0	0	0	2	0	0	0	0	7	10	2	3	0	0	0	0	0	2	0	0	0	0	26
25c47fa9ab9ca413bbd94d6991a83e5d	4883#JF277139	99.602	Eukaryota	Stramenopiles	Ochrophyta	Bacillariophyta	Bacillariophyceae	Cymbellales	Cymbellales_X	Cymbellaceae	Cymbopleura	Cymbopleura inducta	0	0	0	0	0	0	0	0	0	0	1	0	0	8	0	0	0	0	3	0	0	0	8	0	0	0	0	0	0	0	0	0	0	20
19e5b20f26309d9f225842990bb15300	7564#HM057746	95.618	Eukaryota	Stramenopiles	Ochrophyta	Dictyochophyceae	Dictyochophyceae_X	Dictyochophyceae_XX	Dictyochophyceae_XXX	Dictyochophyceae_XXXX	Dictyochophyceae_XXXXX	Dictyochophyceae_XXXXX sp.	0	0	0	0	0	0	0	0	0	0	0	0	2	6	0	0	2	0	0	0	0	0	0	0	0	0	3	0	0	0	0	0	0	13
f3c2c9c04990a152e56a5ef0a4bd34ca	7564#HM057746	94.821	Eukaryota	Stramenopiles	Ochrophyta	Dictyochophyceae	Dictyochophyceae_X	Dictyochophyceae_XX	Dictyochophyceae_XXX	Dictyochophyceae_XXXX	Dictyochophyceae_XXXXX	Dictyochophyceae_XXXXX sp.	0	0	0	0	0	0	0	0	0	0	0	0	4	3	2	0	6	0	0	0	0	0	0	0	0	0	2	0	0	0	0	2	0	19
2ed9b7d680dfda63d37b4192f93a57bf	7348#GQ348575	96.414	Eukaryota	Stramenopiles	Ochrophyta	Dictyochophyceae	Dictyochophyceae_X	Dictyochophyceae_XX	Dictyochophyceae_XXX	Dictyochophyceae_XXXX	Dictyochophyceae_XXXXX	Dictyochophyceae_XXXXX sp.	0	0	0	0	0	0	2	0	0	0	0	0	13	9	3	6	3	0	3	13	6	3	0	0	2	0	30	22	6	6	4	5	0	136
d27cf2e301af3e42cdc0c89a505bc44b	6768#HQ166759	100	Eukaryota	Stramenopiles	Ochrophyta	Dictyochophyceae	Dictyochophyceae_X	Dictyochophyceae_XX	Dictyochophyceae_XXX	Dictyochophyceae_XXXX	Dictyochophyceae_XXXXX	Dictyochophyceae_XXXXX sp.	0	0	0	0	0	0	0	0	0	0	0	0	0	0	0	0	0	0	0	5	2	2	0	0	0	0	4	0	0	0	0	0	0	13
d99cf746758409d6f3e8b4e2b709dbee	6606#JX945336	100	Eukaryota	Stramenopiles	Ochrophyta	Dictyochophyceae	Dictyochophyceae_X	Dictyochophyceae_XX	Dictyochophyceae_XXX	Dictyochophyceae_XXXX	Dictyochophyceae_XXXXX	Dictyochophyceae_XXXXX sp.	4	0	0	0	0	0	0	0	0	0	0	0	17	20	18	10	3	6	7	63	20	8	19	0	0	0	6	3	0	0	2	0	0	206
7dc6e29efdb42d2d38a43606d9fccfb1	7520#HM798991	99.602	Eukaryota	Stramenopiles	Ochrophyta	Dictyochophyceae	Dictyochophyceae_X	Dictyochophyceae_XX	Dictyochophyceae_XXX	Dictyochophyceae_XXXX	Dictyochophyceae_XXXXX	Dictyochophyceae_XXXXX sp.	0	0	0	0	0	0	0	0	0	0	0	0	0	3	0	0	0	0	0	0	0	0	0	0	0	0	4	0	0	0	0	4	0	11
d2d98b3c96b8cc139ac82117880eceb9	7564#HM057746	96.414	Eukaryota	Stramenopiles	Ochrophyta	Dictyochophyceae	Dictyochophyceae_X	Dictyochophyceae_XX	Dictyochophyceae_XXX	Dictyochophyceae_XXXX	Dictyochophyceae_XXXXX	Dictyochophyceae_XXXXX sp.	0	0	0	0	0	0	0	0	0	0	0	0	0	3	0	0	3	2	2	0	0	0	0	0	0	0	0	0	0	0	0	0	0	10
5bd378f1e7cd050ab4023f18dc81c5d5	7348#GQ348575	98.008	Eukaryota	Stramenopiles	Ochrophyta	Dictyochophyceae	Dictyochophyceae_X	Dictyochophyceae_XX	Dictyochophyceae_XXX	Dictyochophyceae_XXXX	Dictyochophyceae_XXXXX	Dictyochophyceae_XXXXX sp.	0	0	0	0	0	0	0	0	0	0	0	0	8	2	0	0	2	0	0	1	0	0	0	0	0	0	0	0	0	0	0	0	0	13
2b8638b8cce54ca74ac3fad64cb75bd1	6687#KC002426	94.8	Eukaryota	Stramenopiles	Ochrophyta	Dictyochophyceae	Dictyochophyceae_X	Dictyochophyceae_XX	Dictyochophyceae_XXX	Dictyochophyceae_XXXX	Dictyochophyceae_XXXXX	Dictyochophyceae_XXXXX sp.	0	0	0	0	0	0	0	0	0	0	0	0	0	0	0	0	0	0	0	5	0	0	3	0	0	0	8	0	0	0	2	0	0	18
981d856d573f9b80b509d1dbb02d1483	7658#JN429985	90.837	Eukaryota	Stramenopiles	Ochrophyta	Dictyochophyceae	Dictyochophyceae_X	Dictyochophyceae_XX	Dictyochophyceae_XXX	Dictyochophyceae_XXXX	Dictyochophyceae_XXXXX	Dictyochophyceae_XXXXX sp.	0	0	0	0	0	0	0	0	0	2	2	0	13	2	2	0	5	0	8	47	6	209	92	0	0	5	2	7	0	2	154	29	8	595
a57452ebd30c12ebbf366980878738f2	6888#U70717	100	Eukaryota	Stramenopiles	Ochrophyta	Phaeophyceae	Phaeophyceae_X	Ectocarpales	Ectocarpales_X	Ectocarpaceae	Ectocarpaceae_X	Ectocarpaceae_X sp.	0	0	0	0	0	0	0	0	0	0	0	0	2	2	0	2	0	0	0	0	0	0	0	0	0	0	0	0	0	0	0	0	0	6
c2e4e53d6c5541b18e6ad4d32f4b9eeb	6026#NC_015403	97.61	Eukaryota	Stramenopiles	Ochrophyta	Bacillariophyta	Bacillariophyceae	Naviculales	Naviculales_X	Naviculaceae	Fistulifera	Fistulifera sp.	0	0	0	0	0	0	0	0	0	0	0	0	0	0	0	0	0	0	0	0	0	0	0	0	0	0	652	3	18	10	0	0	0	683
0b170ca806d94bce1423c2b3850b288d	6026#NC_015403	98.406	Eukaryota	Stramenopiles	Ochrophyta	Bacillariophyta	Bacillariophyceae	Naviculales	Naviculales_X	Naviculaceae	Fistulifera	Fistulifera sp.	0	0	0	0	0	0	0	0	0	0	0	0	0	0	0	0	0	0	0	0	0	0	0	0	0	0	0	0	24	1	0	39	0	64
4f509c937e73f83ba0aaf833f5e0e2de	7901#GU940883	99.602	Eukaryota	Stramenopiles	Ochrophyta	Dictyochophyceae	Dictyochophyceae_X	Florenciellales	Florenciellales_X	Florenciellales_XX	Florenciellales_XXX	Florenciellales_XXX sp.	0	2	0	0	0	0	0	0	0	0	0	0	0	0	0	8	0	0	0	0	0	0	0	0	0	0	0	0	0	0	0	0	0	10
2048f1af4e8547b6cd9921498d22334d	6327#FJ849131	98.805	Eukaryota	Stramenopiles	Ochrophyta	Bacillariophyta	Fragilariophyceae	Fragilariales	Fragilariales_X	Fragilariaceae	Fragilariaceae_X	Fragilariaceae_X sp.	2	0	0	0	0	0	0	0	0	0	0	0	19	0	0	0	0	0	0	0	0	0	0	0	0	0	0	0	0	0	0	0	0	21
aa48dd3198f6ede9238761414d3de0af	7928#FJ849115	99.203	Eukaryota	Stramenopiles	Ochrophyta	Bacillariophyta	Fragilariophyceae	Fragilariales	Fragilariales_X	Fragilariaceae	Fragilariaceae_X	Fragilariaceae_X sp.	2	4	0	0	2	6	3	11	11	1	0	0	0	12	0	0	0	4	0	0	0	0	0	0	15	0	0	0	13	0	0	0	0	84
a4c7dfb57529e8acd8ded02f0ab94b7c	474#	99.602	Eukaryota	Stramenopiles	Ochrophyta	Dictyochophyceae	Dictyochophyceae_X	Dictyochophyceae_XX	Dictyochophyceae_XXX	Dictyochophyceae_XXXX	Helicopedinella	Helicopedinella sp.	0	0	0	0	0	0	0	0	0	0	0	0	3	7	0	5	2	3	0	0	0	0	0	0	0	0	0	0	0	0	0	0	0	20
e9aa9aa95de124fa763c7a12696bb96f	728#AB073112	100	Eukaryota	Hacrobia	Cryptophyta	Cryptophyceae	Cryptophyceae_X	Pyrenomonadales	Pyrenomonadales_X	Chroomonadaceae	Hemiselmis	Hemiselmis virescens	0	0	0	0	0	0	0	0	0	0	0	0	13	3	6	1	6	0	2	26	2	7	81	0	0	4	0	0	0	0	3	19	6	179
43c0e25751423ebc800be62febdc724e	5948#NC_010772	99.197	Eukaryota	Stramenopiles	Ochrophyta	Raphidophyceae	Raphidophyceae_X	Chattonellales	Chattonellales_X	Chattonellaceae	Heterosigma	Heterosigma akashiwo	0	0	0	0	0	0	0	0	0	0	0	0	0	0	4	0	2	0	0	0	0	0	8	0	0	0	0	0	0	0	0	7	0	21
733daa1798fd3dfcad62c70bf5d15737	5948#NC_010772	100	Eukaryota	Stramenopiles	Ochrophyta	Raphidophyceae	Raphidophyceae_X	Chattonellales	Chattonellales_X	Chattonellaceae	Heterosigma	Heterosigma akashiwo	0	0	0	0	0	0	0	0	0	0	2	0	3	0	0	0	0	2	0	4	0	0	19	0	0	0	0	1	0	0	0	14	11	56
eeca4e5bab6ab0973486a9d9a77642e3	5948#NC_010772	97.59	Eukaryota	Stramenopiles	Ochrophyta	Raphidophyceae	Raphidophyceae_X	Chattonellales	Chattonellales_X	Chattonellaceae	Heterosigma	Heterosigma akashiwo	0	0	0	0	0	0	0	0	0	0	0	0	4	2	13	0	2	0	4	8	6	4	2	0	2	5	8	40	0	12	31	1	0	144
9ce14ef79c10813a22018f8c132496a1	5948#NC_010772	97.992	Eukaryota	Stramenopiles	Ochrophyta	Raphidophyceae	Raphidophyceae_X	Chattonellales	Chattonellales_X	Chattonellaceae	Heterosigma	Heterosigma akashiwo	0	0	0	0	0	0	0	0	0	0	0	0	0	8	0	0	0	0	8	6	4	0	0	0	0	0	11	83	0	13	0	0	0	133
bd405d83ca0478315b984ed80a3ffeb7	4546#JN207213	99.602	Eukaryota	Stramenopiles	Ochrophyta	Bacillariophyta	Coscinodiscophyceae	Melosirales	Melosirales_X	Melosirales_XX	Melosirales_XXX	Melosirales_XXX sp.	0	0	0	0	0	0	6	25	3	7	0	0	0	0	0	0	0	0	0	0	0	0	0	0	0	0	0	0	0	0	0	0	0	41
2d23eceb46d42bdc2b2cee337820046d	6351#GU119713	100	Eukaryota	Stramenopiles	Ochrophyta	Eustigmatophyceae	Eustigmatophyceae_X	Eustigmatales	Eustigmatales_X	Monodopsidaceae	Monodopsidaceae_X	Monodopsidaceae_X sp.	0	2	2	5	0	0	0	0	0	0	0	0	29	31	22	27	15	24	19	18	14	9	4	0	0	14	42	23	2	9	4	4	0	319
f0545123878aa60fc8bea89fcd4bad2a	990#	100	Eukaryota	Stramenopiles	Ochrophyta	Eustigmatophyceae	Eustigmatophyceae_X	Eustigmatales	Eustigmatales_X	Monodopsidaceae	Nannochloropsis	Nannochloropsis sp.	0	0	0	3	0	3	3	0	0	0	0	0	4	0	14	43	24	30	5	2	2	2	2	0	0	9	15	2	0	2	0	2	0	167
953578861b58a4610b6d68d12d8d6cd1	3056#FN563083	98.406	Eukaryota	Archaeplastida	Chlorophyta	Nephroselmidophyceae	Nephroselmidophyceae_X	Nephroselmidales	Nephroselmidales_X	Nephroselmidaceae	Nephroselmis	Nephroselmis pyriformis	0	0	0	0	0	0	0	0	0	0	0	0	0	0	0	0	0	0	0	3	0	4	6	0	0	0	0	0	0	0	0	3	0	16
3984335adce4888c98e99c054c439b88	893#FJ649267	99.203	Eukaryota	Stramenopiles	Ochrophyta	Chrysophyceae	Chrysophyceae_X	Chromulinales	Chromulinales_X	Chromulinaceae	Ochromonas	Ochromonas sp.	0	0	0	0	0	0	0	0	0	0	0	0	0	0	0	2	0	0	0	0	0	4	0	0	0	0	3	0	0	2	0	0	0	11
fd8fa2195649c0a579986ecc10c3507f	781#EF052043	99.602	Eukaryota	Stramenopiles	Ochrophyta	Chrysophyceae	Chrysophyceae_X	Chromulinales	Chromulinales_X	Chromulinaceae	Ochromonas	Ochromonas sp.	0	0	0	0	0	0	0	0	0	0	0	0	0	1	0	3	0	2	0	0	0	0	0	0	0	0	15	1	0	0	0	0	0	22
1668241e6230d9ad801957939f0efe27	781#EF052043	99.203	Eukaryota	Stramenopiles	Ochrophyta	Chrysophyceae	Chrysophyceae_X	Chromulinales	Chromulinales_X	Chromulinaceae	Ochromonas	Ochromonas sp.	0	0	0	0	0	0	0	0	0	0	0	0	0	2	3	1	2	6	4	5	0	2	6	0	0	0	18	13	0	6	2	0	0	70
38b6e7f74a3d7e974dc7c22444336dd4	470#X65101	97.2	Eukaryota	Hacrobia	Haptophyta	Prymnesiophyceae	Prymnesiophyceae_X	Coccolithales	Coccolithales_X	Hymenomonadaceae	Ochrosphaera	Ochrosphaera sp.	0	0	0	0	0	0	0	0	0	0	0	0	0	0	0	0	0	0	0	0	0	0	0	0	0	0	0	0	0	0	0	0	11	11
7e2269fd0704a56c2d0cba87b5e5e4cd	285#FJ159134	100	Eukaryota	Stramenopiles	Ochrophyta	Bacillariophyta	Coscinodiscophyceae	Cymatosirales	Cymatosirales_X	Cymatosiraceae	Papiliocellulus	Papiliocellulus sp.	0	0	0	0	0	0	0	0	0	0	0	0	0	0	0	11	0	0	2	0	0	0	0	0	0	0	0	0	0	0	0	0	0	13
dbcdfdd762bc9ed3e099e64f8c466748	5357#AB196970	100	Eukaryota	Hacrobia	Haptophyta	Pavlovophyceae	Pavlovophycidae	Pavlovales	Pavlovales_X	Pavlovaceae	Pavlova	Pavlova sp.	0	0	0	0	0	0	0	0	0	0	0	0	0	0	2	0	3	0	0	6	0	0	3	0	2	6	0	0	0	0	0	2	2	26
fa35e6519b54a4386310a31754fe9607	325#AY702167	100	Eukaryota	Hacrobia	Haptophyta	Pavlovophyceae	Pavlovophycidae	Pavlovales	Pavlovales_X	Pavlovaceae	Pavlova	Pavlova sp.	0	0	0	0	0	0	0	0	0	0	0	0	6	2	0	0	0	0	0	5	0	0	2	0	0	0	0	0	4	0	2	0	10	31
de769a01eb543fcd46f9d6f714bdb95c	602#FJ826020	100	Eukaryota	Stramenopiles	Ochrophyta	Dictyochophyceae	Dictyochophyceae_X	Pedinellales	Pedinellales_X	Pedinellales_XX	Pedinellales_XXX	Pedinellales_XXX sp.	0	0	0	0	0	0	0	0	6	0	0	0	2	9	0	3	0	0	0	6	7	0	0	0	0	0	2	0	0	2	0	0	0	37
3d533fdd88ee5455a6a71497682b6093	7976#EU805127	100	Eukaryota	Hacrobia	Haptophyta	Prymnesiophyceae	Prymnesiophycidae_X	Phaeocystales/Prymnesiales	Phaeocystales/Prymnesiales	Phaeocystaceae/Prymnesiaceae	Phaeocystaceae/Prymnesiaceae	Phaeocystaceae/Prymnesiaceae sp.	0	0	0	0	0	0	0	0	0	0	0	0	19	37	0	24	16	14	10	50	14	12	6	0	5	4	52	10	3	6	4	0	0	286
eb48ada1a8db6195fc2131a3e6d9d13a	7482#EF574700	94.821	Eukaryota	Hacrobia	Haptophyta	Prymnesiophyceae	Prymnesiophycidae_X	Phaeocystales/Prymnesiales	Phaeocystales/Prymnesiales	Phaeocystaceae/Prymnesiaceae	Phaeocystaceae/Prymnesiaceae	Phaeocystaceae/Prymnesiaceae sp.	0	0	0	0	0	0	0	0	0	0	0	0	9	5	0	0	0	0	2	6	0	0	3	0	2	0	5	0	0	3	7	0	0	42
f6ef44f9451b20d4d7d00d15f10574c6	7482#EF574700	100	Eukaryota	Hacrobia	Haptophyta	Prymnesiophyceae	Prymnesiophycidae_X	Phaeocystales/Prymnesiales	Phaeocystales/Prymnesiales	Phaeocystaceae/Prymnesiaceae	Phaeocystaceae/Prymnesiaceae	Phaeocystaceae/Prymnesiaceae sp.	3	9	7	9	4	2	0	0	2	0	0	0	74	128	66	228	40	51	33	147	50	23	100	0	3	10	56	31	5	22	10	19	8	1140
5a96e5612cbabbccac17553c0a4d9bbe	4972#AB199883	100	Eukaryota	Hacrobia	Haptophyta	Prymnesiophyceae	Prymnesiophyceae_X	Phaeocystales	Phaeocystales_X	Phaeocystaceae	Phaeocystis	Phaeocystis sp.	0	0	0	0	0	0	2	0	0	0	0	0	1	0	0	0	4	0	3	6	11	3	0	0	0	0	0	2	0	0	0	0	0	32
02c39b673d762215414a52204fb7e3a4	410#AY702143	100	Eukaryota	Hacrobia	Haptophyta	Prymnesiophyceae	Prymnesiophyceae_X	Phaeocystales	Phaeocystales_X	Phaeocystaceae	Phaeocystis	Phaeocystis sp.	0	0	0	0	0	0	0	0	0	0	0	0	0	2	0	0	0	0	0	2	1	1	0	0	0	0	2	0	2	0	0	0	0	10
795779587ff59cbb703f4e7e78f3628e	5396#AB199888	100	Eukaryota	Hacrobia	Haptophyta	Prymnesiophyceae	Prymnesiophyceae_X	Phaeocystales	Phaeocystales_X	Phaeocystaceae	Phaeocystis	Phaeocystis sp.	0	3	0	0	0	0	0	0	2	0	0	0	18	20	14	18	5	6	1	14	3	0	9	0	0	1	4	1	0	7	0	0	0	126
712e0c01400f7c171480049b4119b36c	7937#AB533932	100	Eukaryota	Archaeplastida	Streptophyta	Embryophyceae	Coniferopsida	Coniferales	Coniferales_X	Pinaceae	Pinaceae_X	Pinaceae_X sp.	0	0	0	16	0	0	0	0	0	0	0	0	0	0	0	0	0	0	0	0	0	0	0	0	0	0	0	0	0	0	0	0	0	16
3e8c3ffda8f57451afbe240d4b14b560	929#	98.008	Eukaryota	Hacrobia	Haptophyta	Prymnesiophyceae	Prymnesiophyceae_X	Coccolithales	Coccolithales_X	Pleurochrysidaceae	Pleurochrysis	Pleurochrysis sp.	0	0	0	0	0	0	0	0	0	0	0	0	0	0	0	0	0	0	0	0	0	0	0	0	0	0	0	2	0	0	0	3	7	12
47bc29d9b9f32c0acf0f523fb4fa1c4f	864#FJ002241	97.61	Eukaryota	Stramenopiles	Ochrophyta	Bacillariophyta	Coscinodiscophyceae	Rhizosoleniales	Rhizosoleniales_X	Rhizosoleniaceae	Proboscia	Proboscia indica	0	0	0	0	0	0	0	0	0	0	0	0	0	0	0	0	0	0	0	0	0	0	0	0	0	0	2	0	0	0	0	1	0	3
c6dcc2a74be6cd6cc1096b6e2a357d30	864#FJ002241	100	Eukaryota	Stramenopiles	Ochrophyta	Bacillariophyta	Coscinodiscophyceae	Rhizosoleniales	Rhizosoleniales_X	Rhizosoleniaceae	Proboscia	Proboscia indica	0	2	0	0	0	0	0	0	0	0	0	0	0	16	0	0	0	0	0	0	0	0	0	0	1	0	8	0	0	0	0	0	0	27
eadf6e44e4c39021fefb71953088f8c1	569#KJ513109	100	Eukaryota	Hacrobia	Cryptophyta	Cryptophyceae	Cryptophyceae_X	Pyrenomonadales	Pyrenomonadales_X	Geminigeraceae	Proteomonas	Proteomonas sp.	0	0	0	0	0	0	0	0	0	0	0	0	3	0	0	0	0	0	0	0	0	0	14	0	0	0	0	0	0	0	0	0	0	17
fe6f591c763a952297fd16f1ab7f274a	569#KJ513109	99.602	Eukaryota	Hacrobia	Cryptophyta	Cryptophyceae	Cryptophyceae_X	Pyrenomonadales	Pyrenomonadales_X	Geminigeraceae	Proteomonas	Proteomonas sp.	0	0	0	0	0	0	0	0	0	0	0	0	2	0	13	1	8	0	0	11	3	3	19	0	0	0	0	0	0	0	0	3	2	65
6bce8024ff2b86667023a13c193fe900	7566#EF573693	99.6	Eukaryota	Hacrobia	Haptophyta	Prymnesiophyceae	Prymnesiophycidae_X	Prymnesiales	Prymnesiales_X	Prymnesiaceae	Prymnesiaceae_X	Prymnesiaceae_X sp.	2	0	0	0	0	0	0	0	0	0	0	0	0	0	0	3	0	2	0	5	0	0	0	0	0	2	2	0	0	0	0	0	0	16
cec5aad5a0c000a439388007143a7805	7566#EF573693	100	Eukaryota	Hacrobia	Haptophyta	Prymnesiophyceae	Prymnesiophycidae_X	Prymnesiales	Prymnesiales_X	Prymnesiaceae	Prymnesiaceae_X	Prymnesiaceae_X sp.	0	0	0	0	0	0	0	0	0	0	0	0	11	8	1	9	5	1	2	7	4	5	4	0	2	0	6	0	0	0	3	0	0	68
f3782238eb59ee5fee2df61b2be5ad97	6291#FJ826332	99.203	Eukaryota	Hacrobia	Haptophyta	Prymnesiophyceae	Prymnesiophycidae_X	Prymnesiales	Prymnesiales_X	Prymnesiaceae	Prymnesiaceae_X	Prymnesiaceae_X sp.	0	0	0	0	0	0	0	0	0	0	0	0	1	0	0	0	1	1	0	2	3	1	0	0	0	0	0	0	0	1	0	0	0	10
e5301e86d8c2d3a272160d6182ec890d	812#	100	Eukaryota	Stramenopiles	Ochrophyta	Bacillariophyta	Bacillariophyceae	Bacillariales	Bacillariales_X	Bacillariaceae	Pseudo-nitzchia	Pseudo-nitzchia sp.	1	0	0	0	0	0	0	0	0	0	1	6	5	4	0	0	0	0	13	35	11	30	0	0	0	0	0	19	10	9	54	0	121	319
0d0c8296839a0322dcb03d5a832c7052	696#FJ002177	98.008	Eukaryota	Stramenopiles	Ochrophyta	Bacillariophyta	Bacillariophyceae	Bacillariales	Bacillariales_X	Bacillariaceae	Pseudo-nitzschia	Pseudo-nitzschia sp.	12	0	0	0	0	0	0	0	0	0	0	0	20	0	0	0	0	0	0	0	0	0	0	0	0	0	0	0	0	0	0	0	0	32
b582c9f8da98b70e46c96b513d13a489	696#FJ002177	100	Eukaryota	Stramenopiles	Ochrophyta	Bacillariophyta	Bacillariophyceae	Bacillariales	Bacillariales_X	Bacillariaceae	Pseudo-nitzschia	Pseudo-nitzschia sp.	0	3	0	0	2	0	0	0	0	0	0	0	0	32	0	0	2	0	0	0	0	0	0	0	0	0	0	0	0	0	0	0	0	39
7e24fbc953e2d4b5d23565ded3f9f1ae	7396#AB355043	98.805	Eukaryota	Archaeplastida	Chlorophyta	Prasinophyceae	Prasinophyceae_X	Pyramimonadales	Pyramimonadales_X	Pyramimonadaceae	Pyramimonadaceae_X	Pyramimonadaceae_X sp.	0	0	0	0	0	0	0	0	0	0	0	0	0	0	4	0	7	0	0	7	0	0	0	0	0	1	0	0	0	5	1	0	0	25
221b75b4154b439a00a70ba95ca2e492	7396#AB355043	99.203	Eukaryota	Archaeplastida	Chlorophyta	Prasinophyceae	Prasinophyceae_X	Pyramimonadales	Pyramimonadales_X	Pyramimonadaceae	Pyramimonadaceae_X	Pyramimonadaceae_X sp.	0	0	0	0	0	0	0	0	0	0	0	0	24	7	3	0	10	4	16	11	3	7	7	0	7	9	2	8	0	0	12	0	0	130
b6cef5303f4c4119af9885502ce211fd	7396#AB355043	98.805	Eukaryota	Archaeplastida	Chlorophyta	Prasinophyceae	Prasinophyceae_X	Pyramimonadales	Pyramimonadales_X	Pyramimonadaceae	Pyramimonadaceae_X	Pyramimonadaceae_X sp.	0	0	0	0	0	0	0	0	0	0	0	0	4	3	10	0	0	0	7	22	28	2	2	0	3	0	0	11	0	11	1	0	2	106
1309bf7a38f2bc60e96cd9bfb1adc824	5347#FN563101	98.406	Eukaryota	Archaeplastida	Chlorophyta	Prasinophyceae	Prasinophyceae_X	Pyramimonadales	Pyramimonadales_X	Pyramimonadaceae	Pyramimonas	Pyramimonas disomata	0	0	0	0	0	0	0	0	0	0	0	0	0	0	0	0	0	0	3	2	8	3	7	0	0	0	0	0	0	1	0	4	0	28
f2ecd9ac762bc62e8d63c72e4bdff935	847#FN563102	96.813	Eukaryota	Archaeplastida	Chlorophyta	Prasinophyceae	Prasinophyceae_X	Pyramimonadales	Pyramimonadales_X	Pyramimonadaceae	Pyramimonas	Pyramimonas tetrarhynchus	0	0	0	0	0	0	0	0	0	0	0	0	2	3	2	0	3	0	0	11	12	9	0	0	2	0	0	0	0	0	6	0	0	50
1c6150a1293b3ef5df2fb62d81405375	7758#HQ324867	98.8	Eukaryota	Hacrobia	Cryptophyta	Cryptophyceae	Cryptophyceae_X	Pyrenomonadales	Pyrenomonadales_X	Pyrenomonadaceae	Pyrenomonadaceae_X	Pyrenomonadaceae_X sp.	0	0	0	0	0	0	0	0	0	0	0	0	0	6	1	0	5	0	0	5	0	0	11	0	3	10	3	0	0	0	0	4	2	50
4db7b61428f0443e03322c27a845bb44	6777#JX017189	100	Eukaryota	Hacrobia	Cryptophyta	Cryptophyceae	Cryptophyceae_X	Pyrenomonadales	Pyrenomonadales_X	Pyrenomonadales_XX	Pyrenomonadales_XXX	Pyrenomonadales_XXX sp.	0	0	0	0	0	0	0	0	0	0	0	0	3	0	34	8	8	6	3	84	5	0	104	0	0	4	2	4	3	3	0	29	2	302
a7b3aff05274772f13198698b714cb02	7734#HQ672114	99.576	Eukaryota	Hacrobia	Cryptophyta	Cryptophyceae	Cryptophyceae_X	Pyrenomonadales	Pyrenomonadales_X	Pyrenomonadales_XX	Pyrenomonadales_XXX	Pyrenomonadales_XXX sp.	0	0	0	0	0	0	0	0	0	0	0	0	92	60	35	69	32	26	20	77	13	37	105	0	16	4	18	2	0	5	9	9	8	637
4f488bd4b3b68d4c77e698548a989bdc	999#HE610171	100	Eukaryota	Archaeplastida	Chlorophyta	Pedinophyceae	Pedinophyceae_X	Pedinomonadales	Pedinomonadales_X	Pedinomonadaceae	Resultor	Resultor mikron	0	0	0	0	0	0	0	0	0	0	8	0	0	0	0	0	0	0	0	24	2	2	34	0	0	0	0	0	0	0	0	9	0	79
064577dabd6165d4b2b456bce73759eb	4994#FJ002228	98.008	Eukaryota	Stramenopiles	Ochrophyta	Bacillariophyta	Coscinodiscophyceae	Rhizosoleniales	Rhizosoleniales_X	Rhizosoleniaceae	Rhizosolenia	Rhizosolenia setigera	0	0	0	0	0	0	0	0	0	0	0	0	0	2	0	0	0	7	0	0	0	0	0	0	0	0	95	0	0	0	0	0	0	104
30511ff923433d04db3b4486f8600dda	5397#FJ002170	100	Eukaryota	Stramenopiles	Ochrophyta	Bacillariophyta	Coscinodiscophyceae	Rhizosoleniales	Rhizosoleniales_X	Rhizosoleniaceae	Rhizosolenia	Rhizosolenia setigera	0	0	0	0	0	0	0	0	0	0	2	0	4	12	1	0	15	7	13	91	22	7	95	0	37	54	47	58	79	62	18	79	0	703
9bb6828f4e0a97f1accffc11a06624a7	360#AY702108	98.805	Eukaryota	Hacrobia	Cryptophyta	Cryptophyceae	Cryptophyceae_X	Pyrenomonadales	Pyrenomonadales_X	Pyrenomonadaceae	Storeatula	Storeatula sp.	0	0	0	0	0	0	0	0	0	0	0	0	1	0	0	0	1	0	0	0	0	0	0	0	0	2	0	0	0	0	0	5	10	19
30f23da838a65e0c7cf2c1e09912f519	321#	98.734	Eukaryota	Stramenopiles	Ochrophyta	Bacillariophyta	Bacillariophyta_X	Bacillariophyta_XX	Bacillariophyta_XXX	Leptocylindraceae	Tenuicylindrus	Tenuicylindrus belgicus	0	0	0	0	0	0	0	2	0	0	2	2	0	0	0	0	0	0	6	41	6	12	230	0	0	2	0	21	11	10	43	131	40	559
03064aaa33845a2a0cc06876135f2cea	89#	98.406	Eukaryota	Archaeplastida	Chlorophyta	Chlorodendrophyceae	Chlorodendrophyceae_X	Chlorodendrales	Chlorodendrales_X	Chlorodendraceae	Tetraselmis	Tetraselmis convolutae	0	0	0	0	2	0	0	0	0	0	0	0	0	0	20	0	0	0	0	2	0	0	0	0	0	0	0	0	0	0	0	0	0	24
01eb9e45e4fce8e080a35281fee572cf	870#AY702169	98.805	Eukaryota	Archaeplastida	Chlorophyta	Chlorodendrophyceae	Chlorodendrophyceae_X	Chlorodendrales	Chlorodendrales_X	Chlorodendraceae	Tetraselmis	Tetraselmis sp.	0	0	0	0	0	0	0	0	0	0	0	0	0	0	0	0	0	0	0	2	0	2	0	0	0	2	0	0	0	0	4	0	0	10
db9580a201b10ad159ddb6d6b6915ecd	5461#FJ002197	99.602	Eukaryota	Stramenopiles	Ochrophyta	Bacillariophyta	Fragilariophyceae	Thalassionematales	Thalassionematales_X	Thalassionemataceae	Thalassionema	Thalassionema sp.	0	0	0	0	0	0	0	0	0	0	0	0	0	0	0	0	0	0	4	18	4	2	3	0	1	4	6	107	10	95	24	31	0	309
a01e34543ef11852f12b034d1f1344f2	7484#AF001657	100	Eukaryota	Stramenopiles	Ochrophyta	Bacillariophyta	Fragilariophyceae	Thalassionematales	Thalassionematales_X	Thalassionemataceae	Thalassionemataceae_X	Thalassionemataceae_X sp.	0	0	0	0	0	0	0	0	0	0	0	2	0	0	0	0	0	0	0	0	2	0	0	0	3	0	0	5	2	1	0	52	12	79
74d65c262cb18ea0c8871d4118d3c8c2	7050#GU062154	99.203	Eukaryota	Stramenopiles	Ochrophyta	Bacillariophyta	Coscinodiscophyceae	Triceratiales	Triceratiales_X	Triceratiaceae	Triceratiaceae_X	Triceratiaceae_X sp.	5	0	0	0	0	0	2	1	3	0	0	0	8	14	1	4	0	5	31	81	31	7	6	0	13	0	1	25	1	11	24	0	77	351
3fe8516ab17ee5e20af86251e3cc9baf	7050#GU062154	98.805	Eukaryota	Stramenopiles	Ochrophyta	Bacillariophyta	Coscinodiscophyceae	Triceratiales	Triceratiales_X	Triceratiaceae	Triceratiaceae_X	Triceratiaceae_X sp.	1	0	0	0	0	0	5	2	2	6	2	1	0	9	0	0	5	2	28	239	47	115	234	0	11	61	20	54	13	32	249	59	0	1197
427f03e3d0b1b394daca1c8f6380b473	6629#GU061640	100	Eukaryota	Stramenopiles	Ochrophyta	Phaeophyceae	Xanthophyceae_X	Vaucheriales	Vaucheriales_X	Vaucheriaceae	Vaucheriaceae_X	Vaucheriaceae_X sp.	0	0	0	0	0	0	0	0	0	0	0	0	0	2	8	6	0	3	4	5	2	0	18	0	0	2	54	15	19	12	3	40	2	195
034a3d249fe2c4f09503e0dc82ff3185	8054#JP297615	99.6	Eukaryota	Stramenopiles	Ochrophyta	Bacillariophyta	Coscinodiscophyceae	Thalassiosirales	Thalassiosirales_X				12	0	0	2	3	1	21	12	9	8	53	37	102	42	799	79	66	52	147	481	176	110	1969	0	488	458	625	2112	579	1582	789	7191	4540	22545
												TOTAL	121	42	14	46	62	23	78	85	78	51	114	85	1088	1461	1548	1057	784	650	698	2743	861	1572	4621	2	2506	5563	11320	5622	1710	3727	6933	10717	8901	74883

## Sheet: S3-permanova
Table S3: Permutational analysis of variance testing for effects of size fraction and bloom level on microbial community composition of all samples.
Call:
adonis(formula = dftr_perm ~ size * bloom, data = meta, permutations = 999, method = "bray")
Permutation: free
Number of permutations: 999
Terms added sequentially (first to last)
	Df	SumsOfSqs	MeanSqs	F.Model	R2	Pr(>F)
size	2	1.7781	0.88906	13.4677	0.44943	0.001***
bloom	1	0.3634	0.36344	5.5054	0.09186	0.002**
size:bloom	2	0.0985	0.04923	0.7457	0.02489	0.709
Residuals	26	1.7164	0.06601		0.43382
Total	31	3.9564			1
---
Signif. codes: 0 ‘***’ 0.001 ‘**’ 0.01 ‘*’ 0.05 ‘.’ 0.1 ‘ ’ 1

## Sheet: S4-alphadiv
Table S4: Alpha diversity values and t-test results comparing diversity high- and low-bloom samples within size fractions.
Sample	Size	Bloom	Metric	Value	p-value (t-test, high vs. low bloom)
1	L	High	Evenness	0.747617	0.35925
5	L	High	Evenness	0.793616
6	L	High	Evenness	0.733329
7	L	Low	Evenness	0.652882
11	L	Low	Evenness	0.741246
8	L	Low	Evenness	0.74248
12	L	Low	Evenness	0.814621
9	L	Low	Evenness	0.6524
10	L	Low	Evenness	0.717658
1	L	High	Faith	26.124	0.290536
5	L	High	Faith	33.1652
6	L	High	Faith	32.2504
7	L	Low	Faith	27.3937
11	L	Low	Faith	31.5688
8	L	Low	Faith	30.4071
12	L	Low	Faith	22.8893
9	L	Low	Faith	28.4967
10	L	Low	Faith	26.1553
3	M	High	Evenness	0.619688	0.988249
2	M	High	Evenness	0.642586
4	M	High	Evenness	0.601971
1	M	High	Evenness	0.739725
5	M	High	Evenness	0.679348
6	M	High	Evenness	0.623695
9	M	Low	Evenness	0.675521
7	M	Low	Evenness	0.613664
8	M	Low	Evenness	0.634859
11	M	Low	Evenness	0.67544
10	M	Low	Evenness	0.65828
3	M	High	Faith	26.1989	0.309277
2	M	High	Faith	26.9653
4	M	High	Faith	23.575
1	M	High	Faith	28.8318
5	M	High	Faith	27.6209
6	M	High	Faith	25.7811
9	M	Low	Faith	29.3351
7	M	Low	Faith	24.526
8	M	Low	Faith	29.3469
11	M	Low	Faith	29.8458
10	M	Low	Faith	26.1624
5	S	High	Evenness	0.627393	0.688468
2	S	High	Evenness	0.644755
6	S	High	Evenness	0.649672
3	S	High	Evenness	0.65969
1	S	High	Evenness	0.629498
4	S	High	Evenness	0.594477
7	S	Low	Evenness	0.626124
10	S	Low	Evenness	0.623117
12	S	Low	Evenness	0.715624
11	S	Low	Evenness	0.557897
8	S	Low	Evenness	0.628625
9	S	Low	Evenness	0.596563
5	S	High	Faith	22.8304	0.313642
2	S	High	Faith	22.191
6	S	High	Faith	17.8145
3	S	High	Faith	18.1001
1	S	High	Faith	22.8507
4	S	High	Faith	18.5958
7	S	Low	Faith	24.0974
10	S	Low	Faith	19.1493
12	S	Low	Faith	21.0192
11	S	Low	Faith	21.5308
8	S	Low	Faith	21.1648
9	S	Low	Faith	23.2986

## Sheet: S5-MINE-02
Table S5: All pairs of taxa (Karenia brevis and all microbial SVs) in the smallest size fraction with significant co-variation and the associated Maximal Information Coefficient value.
Source	Target	MICe
Kbrevis	36c542375a8bbe47f1ac5c1dc0d0fed3	0.99403
Kbrevis	c54c0e51b015bda8d964d841302b5aaf	0.99403
Kbrevis	1ef2eca98f33e2c8a632157be5059bfb	0.99403
Kbrevis	5610f9fd4d05131f3274383ca5be7ed2	0.99403
Kbrevis	eb7ad7504f3a8f3dfa3361a19fc14984	0.99403
Kbrevis	84e422b114928ef1d913b13075ca5903	0.99403
Kbrevis	f77e657f16617d6eefe6c409ead568e8	0.99403
Kbrevis	0e17c2c7eab35099465e8d4b48d8afd8	0.99403
Kbrevis	9b1e92389ef0cc5317353e8ea8426a70	0.99403
Kbrevis	cd98632699c5f92b428dd2337fc27563	0.99403
Kbrevis	df976bbb8cae9501a9b0033a2df0750f	0.99403
Kbrevis	4ec07abdb860bda723972447dfa55ddc	0.99403
Kbrevis	675f47f52ab28cdcf30e23836997082e	0.99403
Kbrevis	7a45e5e45d7fa0edc47f2289b8334a4e	0.99403
Kbrevis	8ed57f2c85eafc0de2666de03e90eb14	0.99403
56dfd9d7e24de5f67e68506768209dca	6914f32d9ee2679f7f74b6d5f8f1e9e7	0.99403
88f9ec475057a64bf4002030270aea28	bd846af2fecac1a6d4c6feb5a79c19d6	0.99403
88f9ec475057a64bf4002030270aea28	9f3933039d989e97c9cddf12486db235	0.99403
f1dd1bbb2b0ce8bcad3ed39593851859	827e158b58edb9143492782dd442a065	0.99403
f1dd1bbb2b0ce8bcad3ed39593851859	5f6afde2820b99deca9453b9c66a70df	0.99403
e209928576629d90c305bcb9bcde90af	fe55a2a9399891b5d85be7e695ebf130	0.99403
e209928576629d90c305bcb9bcde90af	eb63b799d3c4037796161ba48a0a1f56	0.99403
827e158b58edb9143492782dd442a065	efebe77af15ff501e89f88e27ae9ca8b	0.99403
827e158b58edb9143492782dd442a065	5f6afde2820b99deca9453b9c66a70df	0.99403
0d5e635df614a9c9a7b42ca3500c0d3c	f322ca331475f9f8e883a0bc356b5c64	0.99403
0d5e635df614a9c9a7b42ca3500c0d3c	f6608e71c06674d8840e9cb8ccb2e74d	0.99403
0d5e635df614a9c9a7b42ca3500c0d3c	fa493aa4f1faf6be9820d19f83cdd969	0.99403
0d5e635df614a9c9a7b42ca3500c0d3c	4cc87bf12585f95f9a1de927168e045a	0.99403
36c542375a8bbe47f1ac5c1dc0d0fed3	93b2cb19723f915a805a4cd20f594f07	0.99403
36c542375a8bbe47f1ac5c1dc0d0fed3	fbe36876d118508cf7e4fb67cbc032e2	0.99403
36c542375a8bbe47f1ac5c1dc0d0fed3	84e422b114928ef1d913b13075ca5903	0.99403
36c542375a8bbe47f1ac5c1dc0d0fed3	f77e657f16617d6eefe6c409ead568e8	0.99403
36c542375a8bbe47f1ac5c1dc0d0fed3	df976bbb8cae9501a9b0033a2df0750f	0.99403
36c542375a8bbe47f1ac5c1dc0d0fed3	f20ee43e33f1279fad16f974401722fe	0.99403
36c542375a8bbe47f1ac5c1dc0d0fed3	4ec07abdb860bda723972447dfa55ddc	0.99403
36c542375a8bbe47f1ac5c1dc0d0fed3	c32ce62e761aa03efc16dbbe38590a82	0.99403
2df027f1916ba6adc16236ddf0fb17a6	82ab1c4ae0247432ba9b9493cfbc6b14	0.99403
2df027f1916ba6adc16236ddf0fb17a6	8e5281a27251d237ae4b293a88ea1fca	0.99403
2df027f1916ba6adc16236ddf0fb17a6	82e4b4a214f2418f9f684f6e28464431	0.99403
2df027f1916ba6adc16236ddf0fb17a6	9836a665d89d50221c106ab49a9fd5f1	0.99403
2df027f1916ba6adc16236ddf0fb17a6	790e976dfd7c72094f38aee1b759d212	0.99403
2df027f1916ba6adc16236ddf0fb17a6	eb63b799d3c4037796161ba48a0a1f56	0.99403
2df027f1916ba6adc16236ddf0fb17a6	da17572657f5636c66a5ce8c2d04922f	0.99403
ee127d2b4880fc0a1f416d3c6907bfea	bdb19eb6ef13bfed15a7ebb821a6d403	0.99403
6bb3cfdda2d01ec3bae2be8e68c469e4	06c4da6859980f19124f84f1a07cf264	0.99403
932c94ef9ab7cd5dbb25803383b81a78	efebe77af15ff501e89f88e27ae9ca8b	0.99403
932c94ef9ab7cd5dbb25803383b81a78	08aeba14cd002cb375f0f880423b0373	0.99403
932c94ef9ab7cd5dbb25803383b81a78	88e6f82436084085cc315124858fcceb	0.99403
932c94ef9ab7cd5dbb25803383b81a78	db15ab9a45047795ca19c70acb4bee26	0.99403
f322ca331475f9f8e883a0bc356b5c64	f6608e71c06674d8840e9cb8ccb2e74d	0.99403
f322ca331475f9f8e883a0bc356b5c64	fa493aa4f1faf6be9820d19f83cdd969	0.99403
f322ca331475f9f8e883a0bc356b5c64	0f407bb44ce651722dc620d0f9490b63	0.99403
82ab1c4ae0247432ba9b9493cfbc6b14	8e5281a27251d237ae4b293a88ea1fca	0.99403
82ab1c4ae0247432ba9b9493cfbc6b14	6dfadde7fb5268d8c6b03f5820ed9540	0.99403
82ab1c4ae0247432ba9b9493cfbc6b14	82e4b4a214f2418f9f684f6e28464431	0.99403
82ab1c4ae0247432ba9b9493cfbc6b14	790e976dfd7c72094f38aee1b759d212	0.99403
82ab1c4ae0247432ba9b9493cfbc6b14	60da738bc4b046c5c5c7b22f77832a90	0.99403
82ab1c4ae0247432ba9b9493cfbc6b14	1567b4dacafc28391f53de9efb63c5b9	0.99403
82ab1c4ae0247432ba9b9493cfbc6b14	b42fc99cbb9150042fb31318bd88b12c	0.99403
82ab1c4ae0247432ba9b9493cfbc6b14	f7e7b8d4ffbc3a51d19581269876ac78	0.99403
a1a830867e5263c7c5a346034d0665dd	aafcb8286072f743504c5ffde9d97035	0.99403
a1a830867e5263c7c5a346034d0665dd	9ff870beffc06840cef39de196bcc29e	0.99403
a1a830867e5263c7c5a346034d0665dd	eb32459bd42821aedd3001b8cfbb676e	0.99403
a1a830867e5263c7c5a346034d0665dd	45ce9f54d9768cda11c5fd16fb7376f9	0.99403
a1a830867e5263c7c5a346034d0665dd	422efbd87a37e2b1e7b7fa621cc99374	0.99403
a1a830867e5263c7c5a346034d0665dd	8a13f20e0e4548413b745bf51c9980b3	0.99403
a1a830867e5263c7c5a346034d0665dd	c4b50715602cceccd5ba14916e71bbbb	0.99403
6144a85c82e8a1270fcf3d3d9e75a21f	c8583ffc493e6da2028670a01931b6a7	0.99403
6144a85c82e8a1270fcf3d3d9e75a21f	19b0fb1765b3e69797548d682c6cc9e5	0.99403
c4b95a9b5ca76755b59ccd86ae6deba0	d9ba875ec594e62c868f973b4a4d7a05	0.99403
aafcb8286072f743504c5ffde9d97035	9ff870beffc06840cef39de196bcc29e	0.99403
aafcb8286072f743504c5ffde9d97035	eb32459bd42821aedd3001b8cfbb676e	0.99403
aafcb8286072f743504c5ffde9d97035	45ce9f54d9768cda11c5fd16fb7376f9	0.99403
aafcb8286072f743504c5ffde9d97035	422efbd87a37e2b1e7b7fa621cc99374	0.99403
aafcb8286072f743504c5ffde9d97035	8a13f20e0e4548413b745bf51c9980b3	0.99403
a05ba1ba10f7ad7834d8ae32490b920c	bf486bb1d9da587f9f41912eee4b2e77	0.99403
a05ba1ba10f7ad7834d8ae32490b920c	c54c0e51b015bda8d964d841302b5aaf	0.99403
a05ba1ba10f7ad7834d8ae32490b920c	8784c48f2e25f83675c16a766ef0a315	0.99403
a05ba1ba10f7ad7834d8ae32490b920c	5610f9fd4d05131f3274383ca5be7ed2	0.99403
a05ba1ba10f7ad7834d8ae32490b920c	9836a665d89d50221c106ab49a9fd5f1	0.99403
a05ba1ba10f7ad7834d8ae32490b920c	eb7ad7504f3a8f3dfa3361a19fc14984	0.99403
a05ba1ba10f7ad7834d8ae32490b920c	da17572657f5636c66a5ce8c2d04922f	0.99403
a05ba1ba10f7ad7834d8ae32490b920c	0e17c2c7eab35099465e8d4b48d8afd8	0.99403
a05ba1ba10f7ad7834d8ae32490b920c	9b1e92389ef0cc5317353e8ea8426a70	0.99403
a05ba1ba10f7ad7834d8ae32490b920c	cd98632699c5f92b428dd2337fc27563	0.99403
a05ba1ba10f7ad7834d8ae32490b920c	79b7674106bc3fb9eccf73c5bd64bfb5	0.99403
a05ba1ba10f7ad7834d8ae32490b920c	7a45e5e45d7fa0edc47f2289b8334a4e	0.99403
a05ba1ba10f7ad7834d8ae32490b920c	8ed57f2c85eafc0de2666de03e90eb14	0.99403
a05ba1ba10f7ad7834d8ae32490b920c	56f9c987896664bf30b7df45f17c2c30	0.99403
ce851835782c77fa754b92d567741d8d	86b2330bed886db04003f3661fb61d5b	0.99403
ce851835782c77fa754b92d567741d8d	6d9bcdb24b32c7202cf6f079065280f3	0.99403
ce851835782c77fa754b92d567741d8d	2ffc32fd670446fa2a95b2209aaf1a9a	0.99403
ce851835782c77fa754b92d567741d8d	5511d7e46c7812c750470a3d28c32f4d	0.99403
ce851835782c77fa754b92d567741d8d	5becdcb4c3c8cfac25525c0b7e4ff555	0.99403
ce851835782c77fa754b92d567741d8d	10ca86dccfe1472117a0599a1f4f1635	0.99403
ce851835782c77fa754b92d567741d8d	b6be254413a7e7d160e6ca9101729245	0.99403
ce851835782c77fa754b92d567741d8d	d239e96a3f1ad1ebf4ed9aee42656456	0.99403
ce851835782c77fa754b92d567741d8d	1ee948b5ef1c4af93bce919fe1350f59	0.99403
ce851835782c77fa754b92d567741d8d	7aafbadd556b5626a3002e486eb63de0	0.99403
ce851835782c77fa754b92d567741d8d	8c68c8f1ca3ceb58bd95ff2e2f7444af	0.99403
ce851835782c77fa754b92d567741d8d	878ac7527f7fdf86178eaa89ab6398fe	0.99403
ce851835782c77fa754b92d567741d8d	20dd251ae02aea592d801d239b63f9e4	0.99403
ce851835782c77fa754b92d567741d8d	3a9208d106ad373e9d8528bbe6b9c5ad	0.99403
ce851835782c77fa754b92d567741d8d	0b5e2d9f6e0cbf6d98e778a7111c4602	0.99403
9ff870beffc06840cef39de196bcc29e	eb32459bd42821aedd3001b8cfbb676e	0.99403
e11b4263eb7a82f04b0bc4333a6bad57	4d87d614337faa60df423f918a0978b3	0.99403
e11b4263eb7a82f04b0bc4333a6bad57	9e8523807c59f3603834a25cbcd86494	0.99403
bf486bb1d9da587f9f41912eee4b2e77	c54c0e51b015bda8d964d841302b5aaf	0.99403
bf486bb1d9da587f9f41912eee4b2e77	8784c48f2e25f83675c16a766ef0a315	0.99403
bf486bb1d9da587f9f41912eee4b2e77	5610f9fd4d05131f3274383ca5be7ed2	0.99403
bf486bb1d9da587f9f41912eee4b2e77	9836a665d89d50221c106ab49a9fd5f1	0.99403
bf486bb1d9da587f9f41912eee4b2e77	eb7ad7504f3a8f3dfa3361a19fc14984	0.99403
bf486bb1d9da587f9f41912eee4b2e77	da17572657f5636c66a5ce8c2d04922f	0.99403
bf486bb1d9da587f9f41912eee4b2e77	0e17c2c7eab35099465e8d4b48d8afd8	0.99403
bf486bb1d9da587f9f41912eee4b2e77	9b1e92389ef0cc5317353e8ea8426a70	0.99403
bf486bb1d9da587f9f41912eee4b2e77	cd98632699c5f92b428dd2337fc27563	0.99403
bf486bb1d9da587f9f41912eee4b2e77	79b7674106bc3fb9eccf73c5bd64bfb5	0.99403
bf486bb1d9da587f9f41912eee4b2e77	7a45e5e45d7fa0edc47f2289b8334a4e	0.99403
bf486bb1d9da587f9f41912eee4b2e77	8ed57f2c85eafc0de2666de03e90eb14	0.99403
bf486bb1d9da587f9f41912eee4b2e77	56f9c987896664bf30b7df45f17c2c30	0.99403
69a038a32cdce0e9c59aa15868003dc0	76d2032108822bcfaa90a4873f7a51aa	0.99403
69a038a32cdce0e9c59aa15868003dc0	e74a94435f9a11aa7948c36985932c84	0.99403
c5110bc820a22854866d6b5ee21344c2	5f042513c67fdd55888051594cb486ac	0.99403
012a40b76058db2b9dc546e8b24e7359	265f93f99468f9605a5031488c920eb1	0.99403
8cf51cdf7c7c33f95196eed87ff337de	1659d7acb4a55ff27e3cbfc218639b9c	0.99403
d2ab948d10088c5dc2d6ebc1858bc08a	ac2662d36a91cba0d6b8fee15d75ead0	0.99403
a18f563b60ef31afe1d5aaf0b4331f3d	1ef2eca98f33e2c8a632157be5059bfb	0.99403
a18f563b60ef31afe1d5aaf0b4331f3d	f7d86c8f4aed4693cbdb2dfc950cc9ad	0.99403
a18f563b60ef31afe1d5aaf0b4331f3d	f5894077625c801e89b4365be5964095	0.99403
a18f563b60ef31afe1d5aaf0b4331f3d	f2467b82d3b5cfa2b5d6973a1a855d78	0.99403
e577a29f0e642142678e3336b0404b24	84aa4e71cb32bea23dcce02d671b2dea	0.99403
e577a29f0e642142678e3336b0404b24	3dd7c51220b26cbed0585ae27d62d3f8	0.99403
e577a29f0e642142678e3336b0404b24	df5a861dbf82d100812defe4b06ce542	0.99403
8e5281a27251d237ae4b293a88ea1fca	82e4b4a214f2418f9f684f6e28464431	0.99403
8e5281a27251d237ae4b293a88ea1fca	9836a665d89d50221c106ab49a9fd5f1	0.99403
8e5281a27251d237ae4b293a88ea1fca	eb63b799d3c4037796161ba48a0a1f56	0.99403
8e5281a27251d237ae4b293a88ea1fca	da17572657f5636c66a5ce8c2d04922f	0.99403
c3b7bf0e9723ee25d30372e02f56677d	5f1e11b766b8b422db0c1f28549d2c34	0.99403
f1fec4dfaa2202d002a437cc4a248e66	6fd0abbdc549c1f98e8be4248bb8dcf6	0.99403
53b359329adc6fecebfc0eb42b6c0e71	4201c8cbbc7f7323b35e8fbdb4f7704a	0.99403
53b359329adc6fecebfc0eb42b6c0e71	b991efbddcb23a9ce7cf362a9a85f7dd	0.99403
53b359329adc6fecebfc0eb42b6c0e71	63b8a1e752085e024b5a398e31b75a9a	0.99403
f0ad8d0f7539cbfc185f437bd21f0e0f	26e3172c82dba111de5112291a32e042	0.99403
6dfadde7fb5268d8c6b03f5820ed9540	82e4b4a214f2418f9f684f6e28464431	0.99403
6dfadde7fb5268d8c6b03f5820ed9540	790e976dfd7c72094f38aee1b759d212	0.99403
6dfadde7fb5268d8c6b03f5820ed9540	60da738bc4b046c5c5c7b22f77832a90	0.99403
6dfadde7fb5268d8c6b03f5820ed9540	1567b4dacafc28391f53de9efb63c5b9	0.99403
6dfadde7fb5268d8c6b03f5820ed9540	b42fc99cbb9150042fb31318bd88b12c	0.99403
6dfadde7fb5268d8c6b03f5820ed9540	f7e7b8d4ffbc3a51d19581269876ac78	0.99403
fe55a2a9399891b5d85be7e695ebf130	eb63b799d3c4037796161ba48a0a1f56	0.99403
60c0b3ef3f120e37a029f9f74dd4fe22	d6165e0582a03dd12b473c294cdd3bcd	0.99403
60c0b3ef3f120e37a029f9f74dd4fe22	99847a0aad4c578374c41bae937991b6	0.99403
60c0b3ef3f120e37a029f9f74dd4fe22	d56d487973829be6bedf092e2fc3b90e	0.99403
60c0b3ef3f120e37a029f9f74dd4fe22	741de23dfdfb60ee191b1bf3fb3e60e7	0.99403
60c0b3ef3f120e37a029f9f74dd4fe22	759ac655001806785218ecfb18b06a1d	0.99403
60c0b3ef3f120e37a029f9f74dd4fe22	b092f7f3425cc2dfc9965117ab63717d	0.99403
60c0b3ef3f120e37a029f9f74dd4fe22	e543abb5f12c23a50072118b9454f001	0.99403
0ad88eda91ad12012d4642bbb446f45b	d1c3545aa01f01c148c8b11eef74200b	0.99403
0ad88eda91ad12012d4642bbb446f45b	790e976dfd7c72094f38aee1b759d212	0.99403
82e4b4a214f2418f9f684f6e28464431	9836a665d89d50221c106ab49a9fd5f1	0.99403
82e4b4a214f2418f9f684f6e28464431	790e976dfd7c72094f38aee1b759d212	0.99403
82e4b4a214f2418f9f684f6e28464431	eb63b799d3c4037796161ba48a0a1f56	0.99403
82e4b4a214f2418f9f684f6e28464431	da17572657f5636c66a5ce8c2d04922f	0.99403
86b2330bed886db04003f3661fb61d5b	1c926ca8fd259c89ece07dfe79c62dfa	0.99403
86b2330bed886db04003f3661fb61d5b	2ffc32fd670446fa2a95b2209aaf1a9a	0.99403
86b2330bed886db04003f3661fb61d5b	5511d7e46c7812c750470a3d28c32f4d	0.99403
86b2330bed886db04003f3661fb61d5b	d8783ee923cd85c2a36a867210303e03	0.99403
86b2330bed886db04003f3661fb61d5b	10ca86dccfe1472117a0599a1f4f1635	0.99403
86b2330bed886db04003f3661fb61d5b	d56d487973829be6bedf092e2fc3b90e	0.99403
86b2330bed886db04003f3661fb61d5b	8fe69c583807bcef08f9788fd3e5ad97	0.99403
86b2330bed886db04003f3661fb61d5b	d239e96a3f1ad1ebf4ed9aee42656456	0.99403
86b2330bed886db04003f3661fb61d5b	1ee948b5ef1c4af93bce919fe1350f59	0.99403
86b2330bed886db04003f3661fb61d5b	0f6006dc9edddee73c4e03a918c3aa66	0.99403
86b2330bed886db04003f3661fb61d5b	5f042513c67fdd55888051594cb486ac	0.99403
86b2330bed886db04003f3661fb61d5b	741de23dfdfb60ee191b1bf3fb3e60e7	0.99403
86b2330bed886db04003f3661fb61d5b	ad21821d85b6e1907c8a16adaa3c10ff	0.99403
86b2330bed886db04003f3661fb61d5b	759ac655001806785218ecfb18b06a1d	0.99403
86b2330bed886db04003f3661fb61d5b	b092f7f3425cc2dfc9965117ab63717d	0.99403
86b2330bed886db04003f3661fb61d5b	96c5f928b96ff41ecf26e1e13259fa64	0.99403
86b2330bed886db04003f3661fb61d5b	16d19beed9098b492bb799ec5c0441d7	0.99403
86b2330bed886db04003f3661fb61d5b	39e70d892a1b487e00ae81b7b70491af	0.99403
86b2330bed886db04003f3661fb61d5b	e543abb5f12c23a50072118b9454f001	0.99403
86b2330bed886db04003f3661fb61d5b	3a9208d106ad373e9d8528bbe6b9c5ad	0.99403
86b2330bed886db04003f3661fb61d5b	0b5e2d9f6e0cbf6d98e778a7111c4602	0.99403
3ceb758c49920cee71fe6e65c3493a43	b6be254413a7e7d160e6ca9101729245	0.99403
3ceb758c49920cee71fe6e65c3493a43	8c68c8f1ca3ceb58bd95ff2e2f7444af	0.99403
3ceb758c49920cee71fe6e65c3493a43	34b68b1ef916cbbfcf7e587bb154452d	0.99403
3ceb758c49920cee71fe6e65c3493a43	dd2c4829035030d079cc39155292c30e	0.99403
3ceb758c49920cee71fe6e65c3493a43	878ac7527f7fdf86178eaa89ab6398fe	0.99403
1c926ca8fd259c89ece07dfe79c62dfa	2ffc32fd670446fa2a95b2209aaf1a9a	0.99403
1c926ca8fd259c89ece07dfe79c62dfa	5511d7e46c7812c750470a3d28c32f4d	0.99403
1c926ca8fd259c89ece07dfe79c62dfa	d8783ee923cd85c2a36a867210303e03	0.99403
1c926ca8fd259c89ece07dfe79c62dfa	10ca86dccfe1472117a0599a1f4f1635	0.99403
1c926ca8fd259c89ece07dfe79c62dfa	d56d487973829be6bedf092e2fc3b90e	0.99403
1c926ca8fd259c89ece07dfe79c62dfa	8fe69c583807bcef08f9788fd3e5ad97	0.99403
1c926ca8fd259c89ece07dfe79c62dfa	d239e96a3f1ad1ebf4ed9aee42656456	0.99403
1c926ca8fd259c89ece07dfe79c62dfa	1ee948b5ef1c4af93bce919fe1350f59	0.99403
1c926ca8fd259c89ece07dfe79c62dfa	0f6006dc9edddee73c4e03a918c3aa66	0.99403
1c926ca8fd259c89ece07dfe79c62dfa	5f042513c67fdd55888051594cb486ac	0.99403
1c926ca8fd259c89ece07dfe79c62dfa	741de23dfdfb60ee191b1bf3fb3e60e7	0.99403
1c926ca8fd259c89ece07dfe79c62dfa	ad21821d85b6e1907c8a16adaa3c10ff	0.99403
1c926ca8fd259c89ece07dfe79c62dfa	759ac655001806785218ecfb18b06a1d	0.99403
1c926ca8fd259c89ece07dfe79c62dfa	84aa4e71cb32bea23dcce02d671b2dea	0.99403
1c926ca8fd259c89ece07dfe79c62dfa	b092f7f3425cc2dfc9965117ab63717d	0.99403
1c926ca8fd259c89ece07dfe79c62dfa	96c5f928b96ff41ecf26e1e13259fa64	0.99403
1c926ca8fd259c89ece07dfe79c62dfa	3dd7c51220b26cbed0585ae27d62d3f8	0.99403
1c926ca8fd259c89ece07dfe79c62dfa	16d19beed9098b492bb799ec5c0441d7	0.99403
1c926ca8fd259c89ece07dfe79c62dfa	39e70d892a1b487e00ae81b7b70491af	0.99403
1c926ca8fd259c89ece07dfe79c62dfa	e543abb5f12c23a50072118b9454f001	0.99403
1c926ca8fd259c89ece07dfe79c62dfa	3a9208d106ad373e9d8528bbe6b9c5ad	0.99403
1c926ca8fd259c89ece07dfe79c62dfa	0b5e2d9f6e0cbf6d98e778a7111c4602	0.99403
c54c0e51b015bda8d964d841302b5aaf	1ef2eca98f33e2c8a632157be5059bfb	0.99403
c54c0e51b015bda8d964d841302b5aaf	5610f9fd4d05131f3274383ca5be7ed2	0.99403
c54c0e51b015bda8d964d841302b5aaf	eb7ad7504f3a8f3dfa3361a19fc14984	0.99403
c54c0e51b015bda8d964d841302b5aaf	84e422b114928ef1d913b13075ca5903	0.99403
c54c0e51b015bda8d964d841302b5aaf	f77e657f16617d6eefe6c409ead568e8	0.99403
c54c0e51b015bda8d964d841302b5aaf	0e17c2c7eab35099465e8d4b48d8afd8	0.99403
c54c0e51b015bda8d964d841302b5aaf	9b1e92389ef0cc5317353e8ea8426a70	0.99403
c54c0e51b015bda8d964d841302b5aaf	cd98632699c5f92b428dd2337fc27563	0.99403
c54c0e51b015bda8d964d841302b5aaf	df976bbb8cae9501a9b0033a2df0750f	0.99403
c54c0e51b015bda8d964d841302b5aaf	4ec07abdb860bda723972447dfa55ddc	0.99403
c54c0e51b015bda8d964d841302b5aaf	675f47f52ab28cdcf30e23836997082e	0.99403
c54c0e51b015bda8d964d841302b5aaf	7a45e5e45d7fa0edc47f2289b8334a4e	0.99403
c54c0e51b015bda8d964d841302b5aaf	8ed57f2c85eafc0de2666de03e90eb14	0.99403
d9b7d98120e626b2f0f10e3febe8682c	67f59db4c23e06a8484ab88a3e520323	0.99403
d9b7d98120e626b2f0f10e3febe8682c	76d2032108822bcfaa90a4873f7a51aa	0.99403
d9b7d98120e626b2f0f10e3febe8682c	e74a94435f9a11aa7948c36985932c84	0.99403
e5842c9c88530748259c56a35e84fb9a	d1c3545aa01f01c148c8b11eef74200b	0.99403
e5842c9c88530748259c56a35e84fb9a	55814a4ea8a202d9b328c7b68584bf90	0.99403
e5842c9c88530748259c56a35e84fb9a	7eab0a327e61cde847742596712dcadb	0.99403
e5842c9c88530748259c56a35e84fb9a	8bd33e664b9a859086f52c1737c36339	0.99403
e5842c9c88530748259c56a35e84fb9a	ee1b83b83a5325710d6f1cf39d7f980f	0.99403
efebe77af15ff501e89f88e27ae9ca8b	08aeba14cd002cb375f0f880423b0373	0.99403
efebe77af15ff501e89f88e27ae9ca8b	88e6f82436084085cc315124858fcceb	0.99403
efebe77af15ff501e89f88e27ae9ca8b	70c3da9a368397a37246d8dcdf38f4cb	0.99403
e6f36661db6fbcff3ccc39aa0a823810	93b2cb19723f915a805a4cd20f594f07	0.99403
e6f36661db6fbcff3ccc39aa0a823810	5100343c1e946364d20e495e3e209bc6	0.99403
e6f36661db6fbcff3ccc39aa0a823810	fbe36876d118508cf7e4fb67cbc032e2	0.99403
e6f36661db6fbcff3ccc39aa0a823810	422efbd87a37e2b1e7b7fa621cc99374	0.99403
e6f36661db6fbcff3ccc39aa0a823810	8a13f20e0e4548413b745bf51c9980b3	0.99403
e6f36661db6fbcff3ccc39aa0a823810	90a3648550c58dac0d8a380eeeb8cf17	0.99403
e6f36661db6fbcff3ccc39aa0a823810	6fd0abbdc549c1f98e8be4248bb8dcf6	0.99403
e6f36661db6fbcff3ccc39aa0a823810	c4b50715602cceccd5ba14916e71bbbb	0.99403
e6f36661db6fbcff3ccc39aa0a823810	1b6b519d3d862ee5aa5f5fb031cbedd7	0.99403
93b2cb19723f915a805a4cd20f594f07	5100343c1e946364d20e495e3e209bc6	0.99403
93b2cb19723f915a805a4cd20f594f07	fbe36876d118508cf7e4fb67cbc032e2	0.99403
93b2cb19723f915a805a4cd20f594f07	422efbd87a37e2b1e7b7fa621cc99374	0.99403
93b2cb19723f915a805a4cd20f594f07	8a13f20e0e4548413b745bf51c9980b3	0.99403
93b2cb19723f915a805a4cd20f594f07	90a3648550c58dac0d8a380eeeb8cf17	0.99403
93b2cb19723f915a805a4cd20f594f07	f20ee43e33f1279fad16f974401722fe	0.99403
93b2cb19723f915a805a4cd20f594f07	c4b50715602cceccd5ba14916e71bbbb	0.99403
93b2cb19723f915a805a4cd20f594f07	1b6b519d3d862ee5aa5f5fb031cbedd7	0.99403
93b2cb19723f915a805a4cd20f594f07	c32ce62e761aa03efc16dbbe38590a82	0.99403
8784c48f2e25f83675c16a766ef0a315	5610f9fd4d05131f3274383ca5be7ed2	0.99403
8784c48f2e25f83675c16a766ef0a315	9836a665d89d50221c106ab49a9fd5f1	0.99403
8784c48f2e25f83675c16a766ef0a315	eb7ad7504f3a8f3dfa3361a19fc14984	0.99403
8784c48f2e25f83675c16a766ef0a315	da17572657f5636c66a5ce8c2d04922f	0.99403
8784c48f2e25f83675c16a766ef0a315	0e17c2c7eab35099465e8d4b48d8afd8	0.99403
8784c48f2e25f83675c16a766ef0a315	9b1e92389ef0cc5317353e8ea8426a70	0.99403
8784c48f2e25f83675c16a766ef0a315	cd98632699c5f92b428dd2337fc27563	0.99403
8784c48f2e25f83675c16a766ef0a315	79b7674106bc3fb9eccf73c5bd64bfb5	0.99403
8784c48f2e25f83675c16a766ef0a315	7a45e5e45d7fa0edc47f2289b8334a4e	0.99403
8784c48f2e25f83675c16a766ef0a315	8ed57f2c85eafc0de2666de03e90eb14	0.99403
8784c48f2e25f83675c16a766ef0a315	56f9c987896664bf30b7df45f17c2c30	0.99403
1ef2eca98f33e2c8a632157be5059bfb	5610f9fd4d05131f3274383ca5be7ed2	0.99403
1ef2eca98f33e2c8a632157be5059bfb	eb7ad7504f3a8f3dfa3361a19fc14984	0.99403
1ef2eca98f33e2c8a632157be5059bfb	84e422b114928ef1d913b13075ca5903	0.99403
1ef2eca98f33e2c8a632157be5059bfb	f77e657f16617d6eefe6c409ead568e8	0.99403
1ef2eca98f33e2c8a632157be5059bfb	0e17c2c7eab35099465e8d4b48d8afd8	0.99403
1ef2eca98f33e2c8a632157be5059bfb	9b1e92389ef0cc5317353e8ea8426a70	0.99403
1ef2eca98f33e2c8a632157be5059bfb	f7d86c8f4aed4693cbdb2dfc950cc9ad	0.99403
1ef2eca98f33e2c8a632157be5059bfb	cd98632699c5f92b428dd2337fc27563	0.99403
1ef2eca98f33e2c8a632157be5059bfb	df976bbb8cae9501a9b0033a2df0750f	0.99403
1ef2eca98f33e2c8a632157be5059bfb	4ec07abdb860bda723972447dfa55ddc	0.99403
1ef2eca98f33e2c8a632157be5059bfb	675f47f52ab28cdcf30e23836997082e	0.99403
1ef2eca98f33e2c8a632157be5059bfb	7a45e5e45d7fa0edc47f2289b8334a4e	0.99403
1ef2eca98f33e2c8a632157be5059bfb	8ed57f2c85eafc0de2666de03e90eb14	0.99403
1ef2eca98f33e2c8a632157be5059bfb	f2467b82d3b5cfa2b5d6973a1a855d78	0.99403
7fc0ccbd86b09190f44369a934b3456c	55814a4ea8a202d9b328c7b68584bf90	0.99403
7fc0ccbd86b09190f44369a934b3456c	9c94712b0ac128883aeed3cf0cd696c7	0.99403
7fc0ccbd86b09190f44369a934b3456c	3b3bbab9ab17d53dd61ce47bd1aef746	0.99403
67f59db4c23e06a8484ab88a3e520323	b34fb0904caa8c1db6df0f5cb24da6b2	0.99403
5610f9fd4d05131f3274383ca5be7ed2	9836a665d89d50221c106ab49a9fd5f1	0.99403
5610f9fd4d05131f3274383ca5be7ed2	eb7ad7504f3a8f3dfa3361a19fc14984	0.99403
5610f9fd4d05131f3274383ca5be7ed2	da17572657f5636c66a5ce8c2d04922f	0.99403
5610f9fd4d05131f3274383ca5be7ed2	f77e657f16617d6eefe6c409ead568e8	0.99403
5610f9fd4d05131f3274383ca5be7ed2	0e17c2c7eab35099465e8d4b48d8afd8	0.99403
5610f9fd4d05131f3274383ca5be7ed2	9b1e92389ef0cc5317353e8ea8426a70	0.99403
5610f9fd4d05131f3274383ca5be7ed2	cd98632699c5f92b428dd2337fc27563	0.99403
5610f9fd4d05131f3274383ca5be7ed2	df976bbb8cae9501a9b0033a2df0750f	0.99403
5610f9fd4d05131f3274383ca5be7ed2	79b7674106bc3fb9eccf73c5bd64bfb5	0.99403
5610f9fd4d05131f3274383ca5be7ed2	7a45e5e45d7fa0edc47f2289b8334a4e	0.99403
5610f9fd4d05131f3274383ca5be7ed2	8ed57f2c85eafc0de2666de03e90eb14	0.99403
5610f9fd4d05131f3274383ca5be7ed2	56f9c987896664bf30b7df45f17c2c30	0.99403
6d9bcdb24b32c7202cf6f079065280f3	d1c251c192e93224962dbb899cf3ea24	0.99403
6d9bcdb24b32c7202cf6f079065280f3	3b3bbab9ab17d53dd61ce47bd1aef746	0.99403
6d9bcdb24b32c7202cf6f079065280f3	db15ab9a45047795ca19c70acb4bee26	0.99403
6d9bcdb24b32c7202cf6f079065280f3	20dd251ae02aea592d801d239b63f9e4	0.99403
2ffc32fd670446fa2a95b2209aaf1a9a	5511d7e46c7812c750470a3d28c32f4d	0.99403
2ffc32fd670446fa2a95b2209aaf1a9a	d8783ee923cd85c2a36a867210303e03	0.99403
2ffc32fd670446fa2a95b2209aaf1a9a	10ca86dccfe1472117a0599a1f4f1635	0.99403
2ffc32fd670446fa2a95b2209aaf1a9a	d56d487973829be6bedf092e2fc3b90e	0.99403
2ffc32fd670446fa2a95b2209aaf1a9a	8fe69c583807bcef08f9788fd3e5ad97	0.99403
2ffc32fd670446fa2a95b2209aaf1a9a	d239e96a3f1ad1ebf4ed9aee42656456	0.99403
2ffc32fd670446fa2a95b2209aaf1a9a	1ee948b5ef1c4af93bce919fe1350f59	0.99403
2ffc32fd670446fa2a95b2209aaf1a9a	0f6006dc9edddee73c4e03a918c3aa66	0.99403
2ffc32fd670446fa2a95b2209aaf1a9a	5f042513c67fdd55888051594cb486ac	0.99403
2ffc32fd670446fa2a95b2209aaf1a9a	741de23dfdfb60ee191b1bf3fb3e60e7	0.99403
2ffc32fd670446fa2a95b2209aaf1a9a	ad21821d85b6e1907c8a16adaa3c10ff	0.99403
2ffc32fd670446fa2a95b2209aaf1a9a	759ac655001806785218ecfb18b06a1d	0.99403
2ffc32fd670446fa2a95b2209aaf1a9a	b092f7f3425cc2dfc9965117ab63717d	0.99403
2ffc32fd670446fa2a95b2209aaf1a9a	96c5f928b96ff41ecf26e1e13259fa64	0.99403
2ffc32fd670446fa2a95b2209aaf1a9a	16d19beed9098b492bb799ec5c0441d7	0.99403
2ffc32fd670446fa2a95b2209aaf1a9a	39e70d892a1b487e00ae81b7b70491af	0.99403
2ffc32fd670446fa2a95b2209aaf1a9a	e543abb5f12c23a50072118b9454f001	0.99403
2ffc32fd670446fa2a95b2209aaf1a9a	3a9208d106ad373e9d8528bbe6b9c5ad	0.99403
2ffc32fd670446fa2a95b2209aaf1a9a	0b5e2d9f6e0cbf6d98e778a7111c4602	0.99403
1040ffc55a036894e9ec2cbe47802e07	79b7674106bc3fb9eccf73c5bd64bfb5	0.99403
1040ffc55a036894e9ec2cbe47802e07	a3ce2b76a5b2daccdcc5c58ee218896a	0.99403
5100343c1e946364d20e495e3e209bc6	fbe36876d118508cf7e4fb67cbc032e2	0.99403
5100343c1e946364d20e495e3e209bc6	422efbd87a37e2b1e7b7fa621cc99374	0.99403
5100343c1e946364d20e495e3e209bc6	8a13f20e0e4548413b745bf51c9980b3	0.99403
5100343c1e946364d20e495e3e209bc6	90a3648550c58dac0d8a380eeeb8cf17	0.99403
5100343c1e946364d20e495e3e209bc6	c4b50715602cceccd5ba14916e71bbbb	0.99403
5100343c1e946364d20e495e3e209bc6	1b6b519d3d862ee5aa5f5fb031cbedd7	0.99403
5511d7e46c7812c750470a3d28c32f4d	d8783ee923cd85c2a36a867210303e03	0.99403
5511d7e46c7812c750470a3d28c32f4d	10ca86dccfe1472117a0599a1f4f1635	0.99403
5511d7e46c7812c750470a3d28c32f4d	d56d487973829be6bedf092e2fc3b90e	0.99403
5511d7e46c7812c750470a3d28c32f4d	8fe69c583807bcef08f9788fd3e5ad97	0.99403
5511d7e46c7812c750470a3d28c32f4d	d239e96a3f1ad1ebf4ed9aee42656456	0.99403
5511d7e46c7812c750470a3d28c32f4d	1ee948b5ef1c4af93bce919fe1350f59	0.99403
5511d7e46c7812c750470a3d28c32f4d	0f6006dc9edddee73c4e03a918c3aa66	0.99403
5511d7e46c7812c750470a3d28c32f4d	5f042513c67fdd55888051594cb486ac	0.99403
5511d7e46c7812c750470a3d28c32f4d	741de23dfdfb60ee191b1bf3fb3e60e7	0.99403
5511d7e46c7812c750470a3d28c32f4d	ad21821d85b6e1907c8a16adaa3c10ff	0.99403
5511d7e46c7812c750470a3d28c32f4d	759ac655001806785218ecfb18b06a1d	0.99403
5511d7e46c7812c750470a3d28c32f4d	b092f7f3425cc2dfc9965117ab63717d	0.99403
5511d7e46c7812c750470a3d28c32f4d	96c5f928b96ff41ecf26e1e13259fa64	0.99403
5511d7e46c7812c750470a3d28c32f4d	16d19beed9098b492bb799ec5c0441d7	0.99403
5511d7e46c7812c750470a3d28c32f4d	39e70d892a1b487e00ae81b7b70491af	0.99403
5511d7e46c7812c750470a3d28c32f4d	e543abb5f12c23a50072118b9454f001	0.99403
5511d7e46c7812c750470a3d28c32f4d	3a9208d106ad373e9d8528bbe6b9c5ad	0.99403
5511d7e46c7812c750470a3d28c32f4d	0b5e2d9f6e0cbf6d98e778a7111c4602	0.99403
9836a665d89d50221c106ab49a9fd5f1	eb63b799d3c4037796161ba48a0a1f56	0.99403
9836a665d89d50221c106ab49a9fd5f1	da17572657f5636c66a5ce8c2d04922f	0.99403
9836a665d89d50221c106ab49a9fd5f1	cd98632699c5f92b428dd2337fc27563	0.99403
7ba3d25c1364399fcd59076c4d90732b	f1f38f42456ee7cfc1fa9bc7c1ee4105	0.99403
7ba3d25c1364399fcd59076c4d90732b	f2816e09b5444945d9cb7c5c801d427d	0.99403
5becdcb4c3c8cfac25525c0b7e4ff555	1659d7acb4a55ff27e3cbfc218639b9c	0.99403
d1c3545aa01f01c148c8b11eef74200b	55814a4ea8a202d9b328c7b68584bf90	0.99403
d1c3545aa01f01c148c8b11eef74200b	7eab0a327e61cde847742596712dcadb	0.99403
d1c3545aa01f01c148c8b11eef74200b	8bd33e664b9a859086f52c1737c36339	0.99403
d1c3545aa01f01c148c8b11eef74200b	ee1b83b83a5325710d6f1cf39d7f980f	0.99403
76d2032108822bcfaa90a4873f7a51aa	e74a94435f9a11aa7948c36985932c84	0.99403
eb7ad7504f3a8f3dfa3361a19fc14984	84e422b114928ef1d913b13075ca5903	0.99403
eb7ad7504f3a8f3dfa3361a19fc14984	f77e657f16617d6eefe6c409ead568e8	0.99403
eb7ad7504f3a8f3dfa3361a19fc14984	0e17c2c7eab35099465e8d4b48d8afd8	0.99403
eb7ad7504f3a8f3dfa3361a19fc14984	9b1e92389ef0cc5317353e8ea8426a70	0.99403
eb7ad7504f3a8f3dfa3361a19fc14984	cd98632699c5f92b428dd2337fc27563	0.99403
eb7ad7504f3a8f3dfa3361a19fc14984	df976bbb8cae9501a9b0033a2df0750f	0.99403
eb7ad7504f3a8f3dfa3361a19fc14984	4ec07abdb860bda723972447dfa55ddc	0.99403
eb7ad7504f3a8f3dfa3361a19fc14984	675f47f52ab28cdcf30e23836997082e	0.99403
eb7ad7504f3a8f3dfa3361a19fc14984	7a45e5e45d7fa0edc47f2289b8334a4e	0.99403
eb7ad7504f3a8f3dfa3361a19fc14984	8ed57f2c85eafc0de2666de03e90eb14	0.99403
d6165e0582a03dd12b473c294cdd3bcd	99847a0aad4c578374c41bae937991b6	0.99403
d6165e0582a03dd12b473c294cdd3bcd	d56d487973829be6bedf092e2fc3b90e	0.99403
d6165e0582a03dd12b473c294cdd3bcd	741de23dfdfb60ee191b1bf3fb3e60e7	0.99403
d6165e0582a03dd12b473c294cdd3bcd	759ac655001806785218ecfb18b06a1d	0.99403
d6165e0582a03dd12b473c294cdd3bcd	b092f7f3425cc2dfc9965117ab63717d	0.99403
d6165e0582a03dd12b473c294cdd3bcd	e543abb5f12c23a50072118b9454f001	0.99403
08aeba14cd002cb375f0f880423b0373	88e6f82436084085cc315124858fcceb	0.99403
08aeba14cd002cb375f0f880423b0373	db15ab9a45047795ca19c70acb4bee26	0.99403
d8783ee923cd85c2a36a867210303e03	8fe69c583807bcef08f9788fd3e5ad97	0.99403
d8783ee923cd85c2a36a867210303e03	16d19beed9098b492bb799ec5c0441d7	0.99403
d8783ee923cd85c2a36a867210303e03	6930c6e8b05fdc647188b4f611c6a705	0.99403
60f980bd7c0b414ac99a2c7faeae33bd	aa13b33f5e1937ef92b901d75f190fbe	0.99403
10ca86dccfe1472117a0599a1f4f1635	d56d487973829be6bedf092e2fc3b90e	0.99403
10ca86dccfe1472117a0599a1f4f1635	8fe69c583807bcef08f9788fd3e5ad97	0.99403
10ca86dccfe1472117a0599a1f4f1635	d239e96a3f1ad1ebf4ed9aee42656456	0.99403
10ca86dccfe1472117a0599a1f4f1635	1ee948b5ef1c4af93bce919fe1350f59	0.99403
10ca86dccfe1472117a0599a1f4f1635	0f6006dc9edddee73c4e03a918c3aa66	0.99403
10ca86dccfe1472117a0599a1f4f1635	5f042513c67fdd55888051594cb486ac	0.99403
10ca86dccfe1472117a0599a1f4f1635	741de23dfdfb60ee191b1bf3fb3e60e7	0.99403
10ca86dccfe1472117a0599a1f4f1635	ad21821d85b6e1907c8a16adaa3c10ff	0.99403
10ca86dccfe1472117a0599a1f4f1635	759ac655001806785218ecfb18b06a1d	0.99403
10ca86dccfe1472117a0599a1f4f1635	b092f7f3425cc2dfc9965117ab63717d	0.99403
10ca86dccfe1472117a0599a1f4f1635	96c5f928b96ff41ecf26e1e13259fa64	0.99403
10ca86dccfe1472117a0599a1f4f1635	16d19beed9098b492bb799ec5c0441d7	0.99403
10ca86dccfe1472117a0599a1f4f1635	39e70d892a1b487e00ae81b7b70491af	0.99403
10ca86dccfe1472117a0599a1f4f1635	e543abb5f12c23a50072118b9454f001	0.99403
10ca86dccfe1472117a0599a1f4f1635	3a9208d106ad373e9d8528bbe6b9c5ad	0.99403
10ca86dccfe1472117a0599a1f4f1635	0b5e2d9f6e0cbf6d98e778a7111c4602	0.99403
8645ac02dc586fcd4a083b94279834f7	6f70472a37bc090d135fd6a3cb14823f	0.99403
8645ac02dc586fcd4a083b94279834f7	e34b34995e0f45e58c99616d7abe9ef8	0.99403
33ec2672acc39980a0e805c26d08cb79	4008675bb29aa1265b7517ae3c608994	0.99403
790e976dfd7c72094f38aee1b759d212	60da738bc4b046c5c5c7b22f77832a90	0.99403
790e976dfd7c72094f38aee1b759d212	1567b4dacafc28391f53de9efb63c5b9	0.99403
790e976dfd7c72094f38aee1b759d212	b42fc99cbb9150042fb31318bd88b12c	0.99403
790e976dfd7c72094f38aee1b759d212	f7e7b8d4ffbc3a51d19581269876ac78	0.99403
6005a02ca4a778165ea119d7f2dab69f	2572e8056b65129f70695e5c4dbf8a2d	0.99403
6005a02ca4a778165ea119d7f2dab69f	69916a1cde832bb15ac5acc0ef5e3518	0.99403
6005a02ca4a778165ea119d7f2dab69f	0467b796cedda0e417b7e95a797eb8fd	0.99403
6005a02ca4a778165ea119d7f2dab69f	fbba10bc26152630ec70583c4fb41d7d	0.99403
443164c71768102f8656148048472610	0315be37f6165f1e87335603ad7d63e9	0.99403
443164c71768102f8656148048472610	6fd0abbdc549c1f98e8be4248bb8dcf6	0.99403
4201c8cbbc7f7323b35e8fbdb4f7704a	7dee4c2d595b453d1565bfa40e967376	0.99403
05564cb3c38d5c04657f9e430c92c9c0	3437f453277efee108b6338b65ec716d	0.99403
7cfed4230313e2ab5c148fe5aa34fe1c	4cc87bf12585f95f9a1de927168e045a	0.99403
fbe36876d118508cf7e4fb67cbc032e2	84e422b114928ef1d913b13075ca5903	0.99403
fbe36876d118508cf7e4fb67cbc032e2	f20ee43e33f1279fad16f974401722fe	0.99403
fbe36876d118508cf7e4fb67cbc032e2	4ec07abdb860bda723972447dfa55ddc	0.99403
fbe36876d118508cf7e4fb67cbc032e2	c4b50715602cceccd5ba14916e71bbbb	0.99403
fbe36876d118508cf7e4fb67cbc032e2	c32ce62e761aa03efc16dbbe38590a82	0.99403
801463e61abcfcc2938e84e16c3929d6	4e7254e7faee92f9868759c556ed73ae	0.99403
801463e61abcfcc2938e84e16c3929d6	05ee809c46ccca3097f50d1123609e5a	0.99403
4e7254e7faee92f9868759c556ed73ae	05ee809c46ccca3097f50d1123609e5a	0.99403
14525301bb4271314d10e75fe308a602	99847a0aad4c578374c41bae937991b6	0.99403
bf7c8b35b60d08c0bf62fc2894b0a543	ad21821d85b6e1907c8a16adaa3c10ff	0.99403
bf7c8b35b60d08c0bf62fc2894b0a543	0342f30ab678cb75dc7d44eb6d1f3c71	0.99403
bf7c8b35b60d08c0bf62fc2894b0a543	b98ca2342c154e97d19aa0130010922f	0.99403
b6be254413a7e7d160e6ca9101729245	8c68c8f1ca3ceb58bd95ff2e2f7444af	0.99403
b6be254413a7e7d160e6ca9101729245	34b68b1ef916cbbfcf7e587bb154452d	0.99403
b6be254413a7e7d160e6ca9101729245	dd2c4829035030d079cc39155292c30e	0.99403
b6be254413a7e7d160e6ca9101729245	878ac7527f7fdf86178eaa89ab6398fe	0.99403
55814a4ea8a202d9b328c7b68584bf90	9c94712b0ac128883aeed3cf0cd696c7	0.99403
55814a4ea8a202d9b328c7b68584bf90	3b3bbab9ab17d53dd61ce47bd1aef746	0.99403
55814a4ea8a202d9b328c7b68584bf90	7eab0a327e61cde847742596712dcadb	0.99403
55814a4ea8a202d9b328c7b68584bf90	ee1b83b83a5325710d6f1cf39d7f980f	0.99403
45ce9f54d9768cda11c5fd16fb7376f9	422efbd87a37e2b1e7b7fa621cc99374	0.99403
45ce9f54d9768cda11c5fd16fb7376f9	8a13f20e0e4548413b745bf51c9980b3	0.99403
d56d487973829be6bedf092e2fc3b90e	8fe69c583807bcef08f9788fd3e5ad97	0.99403
d56d487973829be6bedf092e2fc3b90e	741de23dfdfb60ee191b1bf3fb3e60e7	0.99403
d56d487973829be6bedf092e2fc3b90e	759ac655001806785218ecfb18b06a1d	0.99403
d56d487973829be6bedf092e2fc3b90e	b092f7f3425cc2dfc9965117ab63717d	0.99403
d56d487973829be6bedf092e2fc3b90e	16d19beed9098b492bb799ec5c0441d7	0.99403
d56d487973829be6bedf092e2fc3b90e	e543abb5f12c23a50072118b9454f001	0.99403
8fe69c583807bcef08f9788fd3e5ad97	d239e96a3f1ad1ebf4ed9aee42656456	0.99403
8fe69c583807bcef08f9788fd3e5ad97	1ee948b5ef1c4af93bce919fe1350f59	0.99403
8fe69c583807bcef08f9788fd3e5ad97	0f6006dc9edddee73c4e03a918c3aa66	0.99403
8fe69c583807bcef08f9788fd3e5ad97	5f042513c67fdd55888051594cb486ac	0.99403
8fe69c583807bcef08f9788fd3e5ad97	741de23dfdfb60ee191b1bf3fb3e60e7	0.99403
8fe69c583807bcef08f9788fd3e5ad97	ad21821d85b6e1907c8a16adaa3c10ff	0.99403
8fe69c583807bcef08f9788fd3e5ad97	759ac655001806785218ecfb18b06a1d	0.99403
8fe69c583807bcef08f9788fd3e5ad97	b092f7f3425cc2dfc9965117ab63717d	0.99403
8fe69c583807bcef08f9788fd3e5ad97	96c5f928b96ff41ecf26e1e13259fa64	0.99403
8fe69c583807bcef08f9788fd3e5ad97	16d19beed9098b492bb799ec5c0441d7	0.99403
8fe69c583807bcef08f9788fd3e5ad97	39e70d892a1b487e00ae81b7b70491af	0.99403
8fe69c583807bcef08f9788fd3e5ad97	e543abb5f12c23a50072118b9454f001	0.99403
8fe69c583807bcef08f9788fd3e5ad97	3a9208d106ad373e9d8528bbe6b9c5ad	0.99403
8fe69c583807bcef08f9788fd3e5ad97	0b5e2d9f6e0cbf6d98e778a7111c4602	0.99403
d239e96a3f1ad1ebf4ed9aee42656456	1ee948b5ef1c4af93bce919fe1350f59	0.99403
d239e96a3f1ad1ebf4ed9aee42656456	0f6006dc9edddee73c4e03a918c3aa66	0.99403
d239e96a3f1ad1ebf4ed9aee42656456	5f042513c67fdd55888051594cb486ac	0.99403
d239e96a3f1ad1ebf4ed9aee42656456	741de23dfdfb60ee191b1bf3fb3e60e7	0.99403
d239e96a3f1ad1ebf4ed9aee42656456	ad21821d85b6e1907c8a16adaa3c10ff	0.99403
d239e96a3f1ad1ebf4ed9aee42656456	759ac655001806785218ecfb18b06a1d	0.99403
d239e96a3f1ad1ebf4ed9aee42656456	b092f7f3425cc2dfc9965117ab63717d	0.99403
d239e96a3f1ad1ebf4ed9aee42656456	96c5f928b96ff41ecf26e1e13259fa64	0.99403
d239e96a3f1ad1ebf4ed9aee42656456	16d19beed9098b492bb799ec5c0441d7	0.99403
d239e96a3f1ad1ebf4ed9aee42656456	39e70d892a1b487e00ae81b7b70491af	0.99403
d239e96a3f1ad1ebf4ed9aee42656456	e543abb5f12c23a50072118b9454f001	0.99403
d239e96a3f1ad1ebf4ed9aee42656456	3a9208d106ad373e9d8528bbe6b9c5ad	0.99403
d239e96a3f1ad1ebf4ed9aee42656456	0b5e2d9f6e0cbf6d98e778a7111c4602	0.99403
60da738bc4b046c5c5c7b22f77832a90	0a7cff6daea23145cea146dfb78df6df	0.99403
60da738bc4b046c5c5c7b22f77832a90	0f6006dc9edddee73c4e03a918c3aa66	0.99403
60da738bc4b046c5c5c7b22f77832a90	1567b4dacafc28391f53de9efb63c5b9	0.99403
60da738bc4b046c5c5c7b22f77832a90	b42fc99cbb9150042fb31318bd88b12c	0.99403
60da738bc4b046c5c5c7b22f77832a90	84aa4e71cb32bea23dcce02d671b2dea	0.99403
60da738bc4b046c5c5c7b22f77832a90	96c5f928b96ff41ecf26e1e13259fa64	0.99403
60da738bc4b046c5c5c7b22f77832a90	3dd7c51220b26cbed0585ae27d62d3f8	0.99403
60da738bc4b046c5c5c7b22f77832a90	39e70d892a1b487e00ae81b7b70491af	0.99403
88e6f82436084085cc315124858fcceb	70c3da9a368397a37246d8dcdf38f4cb	0.99403
bd846af2fecac1a6d4c6feb5a79c19d6	9f3933039d989e97c9cddf12486db235	0.99403
0a7cff6daea23145cea146dfb78df6df	0f6006dc9edddee73c4e03a918c3aa66	0.99403
0a7cff6daea23145cea146dfb78df6df	1567b4dacafc28391f53de9efb63c5b9	0.99403
0a7cff6daea23145cea146dfb78df6df	b42fc99cbb9150042fb31318bd88b12c	0.99403
0a7cff6daea23145cea146dfb78df6df	84aa4e71cb32bea23dcce02d671b2dea	0.99403
0a7cff6daea23145cea146dfb78df6df	96c5f928b96ff41ecf26e1e13259fa64	0.99403
0a7cff6daea23145cea146dfb78df6df	3dd7c51220b26cbed0585ae27d62d3f8	0.99403
0a7cff6daea23145cea146dfb78df6df	39e70d892a1b487e00ae81b7b70491af	0.99403
84e422b114928ef1d913b13075ca5903	f77e657f16617d6eefe6c409ead568e8	0.99403
84e422b114928ef1d913b13075ca5903	0e17c2c7eab35099465e8d4b48d8afd8	0.99403
84e422b114928ef1d913b13075ca5903	9b1e92389ef0cc5317353e8ea8426a70	0.99403
84e422b114928ef1d913b13075ca5903	cd98632699c5f92b428dd2337fc27563	0.99403
84e422b114928ef1d913b13075ca5903	df976bbb8cae9501a9b0033a2df0750f	0.99403
84e422b114928ef1d913b13075ca5903	f20ee43e33f1279fad16f974401722fe	0.99403
84e422b114928ef1d913b13075ca5903	4ec07abdb860bda723972447dfa55ddc	0.99403
84e422b114928ef1d913b13075ca5903	675f47f52ab28cdcf30e23836997082e	0.99403
84e422b114928ef1d913b13075ca5903	7a45e5e45d7fa0edc47f2289b8334a4e	0.99403
84e422b114928ef1d913b13075ca5903	8ed57f2c85eafc0de2666de03e90eb14	0.99403
84e422b114928ef1d913b13075ca5903	c32ce62e761aa03efc16dbbe38590a82	0.99403
2fad69fe22cf51d5db90f9809e850883	3fc31391229b05e4b66e7950f1548840	0.99403
9c94712b0ac128883aeed3cf0cd696c7	3b3bbab9ab17d53dd61ce47bd1aef746	0.99403
6f70472a37bc090d135fd6a3cb14823f	82d44e32abc0cb731e83c993dc886c41	0.99403
6f70472a37bc090d135fd6a3cb14823f	f97c644b06dc37cb599522bdbebb00ce	0.99403
6f70472a37bc090d135fd6a3cb14823f	e8caf16f88368cc1ca62882084555291	0.99403
6f70472a37bc090d135fd6a3cb14823f	69916a1cde832bb15ac5acc0ef5e3518	0.99403
6f70472a37bc090d135fd6a3cb14823f	b98ca2342c154e97d19aa0130010922f	0.99403
6f70472a37bc090d135fd6a3cb14823f	fbba10bc26152630ec70583c4fb41d7d	0.99403
a73f97b94d85b164d70e228b442fd480	8080b535f4bf339a8d5fee285ddab60b	0.99403
a73f97b94d85b164d70e228b442fd480	9e8523807c59f3603834a25cbcd86494	0.99403
3b3bbab9ab17d53dd61ce47bd1aef746	db15ab9a45047795ca19c70acb4bee26	0.99403
3b3bbab9ab17d53dd61ce47bd1aef746	20dd251ae02aea592d801d239b63f9e4	0.99403
eb63b799d3c4037796161ba48a0a1f56	da17572657f5636c66a5ce8c2d04922f	0.99403
422efbd87a37e2b1e7b7fa621cc99374	8a13f20e0e4548413b745bf51c9980b3	0.99403
422efbd87a37e2b1e7b7fa621cc99374	90a3648550c58dac0d8a380eeeb8cf17	0.99403
422efbd87a37e2b1e7b7fa621cc99374	c4b50715602cceccd5ba14916e71bbbb	0.99403
422efbd87a37e2b1e7b7fa621cc99374	1b6b519d3d862ee5aa5f5fb031cbedd7	0.99403
da17572657f5636c66a5ce8c2d04922f	cd98632699c5f92b428dd2337fc27563	0.99403
f77e657f16617d6eefe6c409ead568e8	0e17c2c7eab35099465e8d4b48d8afd8	0.99403
f77e657f16617d6eefe6c409ead568e8	9b1e92389ef0cc5317353e8ea8426a70	0.99403
f77e657f16617d6eefe6c409ead568e8	cd98632699c5f92b428dd2337fc27563	0.99403
f77e657f16617d6eefe6c409ead568e8	df976bbb8cae9501a9b0033a2df0750f	0.99403
f77e657f16617d6eefe6c409ead568e8	4ec07abdb860bda723972447dfa55ddc	0.99403
f77e657f16617d6eefe6c409ead568e8	675f47f52ab28cdcf30e23836997082e	0.99403
f77e657f16617d6eefe6c409ead568e8	7a45e5e45d7fa0edc47f2289b8334a4e	0.99403
f77e657f16617d6eefe6c409ead568e8	8ed57f2c85eafc0de2666de03e90eb14	0.99403
7eab0a327e61cde847742596712dcadb	8bd33e664b9a859086f52c1737c36339	0.99403
7eab0a327e61cde847742596712dcadb	ee1b83b83a5325710d6f1cf39d7f980f	0.99403
6f2548da34731900e68ee1bbeed4a579	47591358addd7be611d87aa5fb1d0501	0.99403
0e17c2c7eab35099465e8d4b48d8afd8	9b1e92389ef0cc5317353e8ea8426a70	0.99403
0e17c2c7eab35099465e8d4b48d8afd8	cd98632699c5f92b428dd2337fc27563	0.99403
0e17c2c7eab35099465e8d4b48d8afd8	df976bbb8cae9501a9b0033a2df0750f	0.99403
0e17c2c7eab35099465e8d4b48d8afd8	4ec07abdb860bda723972447dfa55ddc	0.99403
0e17c2c7eab35099465e8d4b48d8afd8	675f47f52ab28cdcf30e23836997082e	0.99403
0e17c2c7eab35099465e8d4b48d8afd8	7a45e5e45d7fa0edc47f2289b8334a4e	0.99403
0e17c2c7eab35099465e8d4b48d8afd8	8ed57f2c85eafc0de2666de03e90eb14	0.99403
8a13f20e0e4548413b745bf51c9980b3	90a3648550c58dac0d8a380eeeb8cf17	0.99403
8a13f20e0e4548413b745bf51c9980b3	c4b50715602cceccd5ba14916e71bbbb	0.99403
8a13f20e0e4548413b745bf51c9980b3	1b6b519d3d862ee5aa5f5fb031cbedd7	0.99403
1ee948b5ef1c4af93bce919fe1350f59	7aafbadd556b5626a3002e486eb63de0	0.99403
1ee948b5ef1c4af93bce919fe1350f59	8c68c8f1ca3ceb58bd95ff2e2f7444af	0.99403
1ee948b5ef1c4af93bce919fe1350f59	16d19beed9098b492bb799ec5c0441d7	0.99403
1ee948b5ef1c4af93bce919fe1350f59	878ac7527f7fdf86178eaa89ab6398fe	0.99403
1ee948b5ef1c4af93bce919fe1350f59	20dd251ae02aea592d801d239b63f9e4	0.99403
1ee948b5ef1c4af93bce919fe1350f59	3a9208d106ad373e9d8528bbe6b9c5ad	0.99403
1ee948b5ef1c4af93bce919fe1350f59	0b5e2d9f6e0cbf6d98e778a7111c4602	0.99403
c8583ffc493e6da2028670a01931b6a7	19b0fb1765b3e69797548d682c6cc9e5	0.99403
0f6006dc9edddee73c4e03a918c3aa66	1567b4dacafc28391f53de9efb63c5b9	0.99403
0f6006dc9edddee73c4e03a918c3aa66	b42fc99cbb9150042fb31318bd88b12c	0.99403
0f6006dc9edddee73c4e03a918c3aa66	84aa4e71cb32bea23dcce02d671b2dea	0.99403
0f6006dc9edddee73c4e03a918c3aa66	96c5f928b96ff41ecf26e1e13259fa64	0.99403
0f6006dc9edddee73c4e03a918c3aa66	3dd7c51220b26cbed0585ae27d62d3f8	0.99403
0f6006dc9edddee73c4e03a918c3aa66	16d19beed9098b492bb799ec5c0441d7	0.99403
0f6006dc9edddee73c4e03a918c3aa66	39e70d892a1b487e00ae81b7b70491af	0.99403
7e857ab7033d8eae6b29d820ef13ebb5	58b68525f7a335fdba75a3ce75720e07	0.99403
7e857ab7033d8eae6b29d820ef13ebb5	34b68b1ef916cbbfcf7e587bb154452d	0.99403
7e857ab7033d8eae6b29d820ef13ebb5	f2816e09b5444945d9cb7c5c801d427d	0.99403
c3b62664bd1a4c55ed9dcd8c92b33583	eb56533502639959923e46d4d4ce2d36	0.99403
f6608e71c06674d8840e9cb8ccb2e74d	fa493aa4f1faf6be9820d19f83cdd969	0.99403
f6608e71c06674d8840e9cb8ccb2e74d	4cc87bf12585f95f9a1de927168e045a	0.99403
9b1e92389ef0cc5317353e8ea8426a70	cd98632699c5f92b428dd2337fc27563	0.99403
9b1e92389ef0cc5317353e8ea8426a70	df976bbb8cae9501a9b0033a2df0750f	0.99403
9b1e92389ef0cc5317353e8ea8426a70	79b7674106bc3fb9eccf73c5bd64bfb5	0.99403
9b1e92389ef0cc5317353e8ea8426a70	7a45e5e45d7fa0edc47f2289b8334a4e	0.99403
9b1e92389ef0cc5317353e8ea8426a70	8ed57f2c85eafc0de2666de03e90eb14	0.99403
9b1e92389ef0cc5317353e8ea8426a70	56f9c987896664bf30b7df45f17c2c30	0.99403
b991efbddcb23a9ce7cf362a9a85f7dd	63b8a1e752085e024b5a398e31b75a9a	0.99403
f7d86c8f4aed4693cbdb2dfc950cc9ad	f5894077625c801e89b4365be5964095	0.99403
f7d86c8f4aed4693cbdb2dfc950cc9ad	f2467b82d3b5cfa2b5d6973a1a855d78	0.99403
06c4da6859980f19124f84f1a07cf264	93c1449aef105c81ee44691574a04fa6	0.99403
c8d1e36cf0bc1f33faf48ef2b3a2cf41	63b8a1e752085e024b5a398e31b75a9a	0.99403
b9c94fb812e22b97b7af9c94291f7c4b	6916815c0ac8c809f4feffb4f33fa465	0.99403
ac2662d36a91cba0d6b8fee15d75ead0	6dd57d68807306a85a30f15e758134d4	0.99403
e131d6b9e4f997788460a450a69c3a99	64bcf94b568e9cbaa0404d841ad75435	0.99403
82d44e32abc0cb731e83c993dc886c41	f97c644b06dc37cb599522bdbebb00ce	0.99403
bce23b9b289bb43bff25cd148f080557	8e422b0b6170093273f54d40542df24c	0.99403
58b68525f7a335fdba75a3ce75720e07	34b68b1ef916cbbfcf7e587bb154452d	0.99403
58b68525f7a335fdba75a3ce75720e07	b06d1f86a1336811966c0e55dafe5152	0.99403
58b68525f7a335fdba75a3ce75720e07	f2816e09b5444945d9cb7c5c801d427d	0.99403
5f042513c67fdd55888051594cb486ac	16d19beed9098b492bb799ec5c0441d7	0.99403
8bd33e664b9a859086f52c1737c36339	ee1b83b83a5325710d6f1cf39d7f980f	0.99403
8bd33e664b9a859086f52c1737c36339	56f9c987896664bf30b7df45f17c2c30	0.99403
8bd33e664b9a859086f52c1737c36339	023ec9fb40715844e7a702c82c060480	0.99403
741de23dfdfb60ee191b1bf3fb3e60e7	ad21821d85b6e1907c8a16adaa3c10ff	0.99403
741de23dfdfb60ee191b1bf3fb3e60e7	759ac655001806785218ecfb18b06a1d	0.99403
741de23dfdfb60ee191b1bf3fb3e60e7	b092f7f3425cc2dfc9965117ab63717d	0.99403
741de23dfdfb60ee191b1bf3fb3e60e7	96c5f928b96ff41ecf26e1e13259fa64	0.99403
741de23dfdfb60ee191b1bf3fb3e60e7	16d19beed9098b492bb799ec5c0441d7	0.99403
741de23dfdfb60ee191b1bf3fb3e60e7	39e70d892a1b487e00ae81b7b70491af	0.99403
741de23dfdfb60ee191b1bf3fb3e60e7	e543abb5f12c23a50072118b9454f001	0.99403
741de23dfdfb60ee191b1bf3fb3e60e7	3a9208d106ad373e9d8528bbe6b9c5ad	0.99403
741de23dfdfb60ee191b1bf3fb3e60e7	0b5e2d9f6e0cbf6d98e778a7111c4602	0.99403
fa493aa4f1faf6be9820d19f83cdd969	0f407bb44ce651722dc620d0f9490b63	0.99403
6916815c0ac8c809f4feffb4f33fa465	7aafbadd556b5626a3002e486eb63de0	0.99403
6916815c0ac8c809f4feffb4f33fa465	3f1304fc1b0de80cad541bdcff9676a5	0.99403
90a3648550c58dac0d8a380eeeb8cf17	6fd0abbdc549c1f98e8be4248bb8dcf6	0.99403
90a3648550c58dac0d8a380eeeb8cf17	c4b50715602cceccd5ba14916e71bbbb	0.99403
90a3648550c58dac0d8a380eeeb8cf17	1b6b519d3d862ee5aa5f5fb031cbedd7	0.99403
7aafbadd556b5626a3002e486eb63de0	8c68c8f1ca3ceb58bd95ff2e2f7444af	0.99403
7aafbadd556b5626a3002e486eb63de0	878ac7527f7fdf86178eaa89ab6398fe	0.99403
7aafbadd556b5626a3002e486eb63de0	20dd251ae02aea592d801d239b63f9e4	0.99403
7aafbadd556b5626a3002e486eb63de0	3a9208d106ad373e9d8528bbe6b9c5ad	0.99403
7aafbadd556b5626a3002e486eb63de0	0b5e2d9f6e0cbf6d98e778a7111c4602	0.99403
f97c644b06dc37cb599522bdbebb00ce	e8caf16f88368cc1ca62882084555291	0.99403
f97c644b06dc37cb599522bdbebb00ce	69916a1cde832bb15ac5acc0ef5e3518	0.99403
f97c644b06dc37cb599522bdbebb00ce	b98ca2342c154e97d19aa0130010922f	0.99403
f97c644b06dc37cb599522bdbebb00ce	fbba10bc26152630ec70583c4fb41d7d	0.99403
ad21821d85b6e1907c8a16adaa3c10ff	16d19beed9098b492bb799ec5c0441d7	0.99403
ad21821d85b6e1907c8a16adaa3c10ff	0342f30ab678cb75dc7d44eb6d1f3c71	0.99403
ad21821d85b6e1907c8a16adaa3c10ff	b98ca2342c154e97d19aa0130010922f	0.99403
b100c6f62ce1fa1c32a8d86bf1166780	2718b99c6ba1460433b7a3bc3c2e35a6	0.99403
f1f38f42456ee7cfc1fa9bc7c1ee4105	f2816e09b5444945d9cb7c5c801d427d	0.99403
759ac655001806785218ecfb18b06a1d	b092f7f3425cc2dfc9965117ab63717d	0.99403
759ac655001806785218ecfb18b06a1d	16d19beed9098b492bb799ec5c0441d7	0.99403
759ac655001806785218ecfb18b06a1d	e543abb5f12c23a50072118b9454f001	0.99403
eb56533502639959923e46d4d4ce2d36	9e8523807c59f3603834a25cbcd86494	0.99403
8c68c8f1ca3ceb58bd95ff2e2f7444af	34b68b1ef916cbbfcf7e587bb154452d	0.99403
8c68c8f1ca3ceb58bd95ff2e2f7444af	dd2c4829035030d079cc39155292c30e	0.99403
8c68c8f1ca3ceb58bd95ff2e2f7444af	878ac7527f7fdf86178eaa89ab6398fe	0.99403
cd98632699c5f92b428dd2337fc27563	df976bbb8cae9501a9b0033a2df0750f	0.99403
cd98632699c5f92b428dd2337fc27563	79b7674106bc3fb9eccf73c5bd64bfb5	0.99403
cd98632699c5f92b428dd2337fc27563	7a45e5e45d7fa0edc47f2289b8334a4e	0.99403
cd98632699c5f92b428dd2337fc27563	8ed57f2c85eafc0de2666de03e90eb14	0.99403
cd98632699c5f92b428dd2337fc27563	56f9c987896664bf30b7df45f17c2c30	0.99403
df976bbb8cae9501a9b0033a2df0750f	4ec07abdb860bda723972447dfa55ddc	0.99403
df976bbb8cae9501a9b0033a2df0750f	675f47f52ab28cdcf30e23836997082e	0.99403
df976bbb8cae9501a9b0033a2df0750f	7a45e5e45d7fa0edc47f2289b8334a4e	0.99403
df976bbb8cae9501a9b0033a2df0750f	8ed57f2c85eafc0de2666de03e90eb14	0.99403
f20ee43e33f1279fad16f974401722fe	4ec07abdb860bda723972447dfa55ddc	0.99403
f20ee43e33f1279fad16f974401722fe	c32ce62e761aa03efc16dbbe38590a82	0.99403
1567b4dacafc28391f53de9efb63c5b9	b42fc99cbb9150042fb31318bd88b12c	0.99403
1567b4dacafc28391f53de9efb63c5b9	84aa4e71cb32bea23dcce02d671b2dea	0.99403
1567b4dacafc28391f53de9efb63c5b9	96c5f928b96ff41ecf26e1e13259fa64	0.99403
1567b4dacafc28391f53de9efb63c5b9	3dd7c51220b26cbed0585ae27d62d3f8	0.99403
1567b4dacafc28391f53de9efb63c5b9	39e70d892a1b487e00ae81b7b70491af	0.99403
93c1449aef105c81ee44691574a04fa6	4cdf9aeb68a51fc2fff2f82e2e682c5b	0.99403
34b68b1ef916cbbfcf7e587bb154452d	f2816e09b5444945d9cb7c5c801d427d	0.99403
b42fc99cbb9150042fb31318bd88b12c	84aa4e71cb32bea23dcce02d671b2dea	0.99403
b42fc99cbb9150042fb31318bd88b12c	96c5f928b96ff41ecf26e1e13259fa64	0.99403
b42fc99cbb9150042fb31318bd88b12c	3dd7c51220b26cbed0585ae27d62d3f8	0.99403
b42fc99cbb9150042fb31318bd88b12c	39e70d892a1b487e00ae81b7b70491af	0.99403
6fd0abbdc549c1f98e8be4248bb8dcf6	1b6b519d3d862ee5aa5f5fb031cbedd7	0.99403
84aa4e71cb32bea23dcce02d671b2dea	96c5f928b96ff41ecf26e1e13259fa64	0.99403
84aa4e71cb32bea23dcce02d671b2dea	3dd7c51220b26cbed0585ae27d62d3f8	0.99403
84aa4e71cb32bea23dcce02d671b2dea	39e70d892a1b487e00ae81b7b70491af	0.99403
b092f7f3425cc2dfc9965117ab63717d	16d19beed9098b492bb799ec5c0441d7	0.99403
b092f7f3425cc2dfc9965117ab63717d	e543abb5f12c23a50072118b9454f001	0.99403
96c5f928b96ff41ecf26e1e13259fa64	3dd7c51220b26cbed0585ae27d62d3f8	0.99403
96c5f928b96ff41ecf26e1e13259fa64	16d19beed9098b492bb799ec5c0441d7	0.99403
96c5f928b96ff41ecf26e1e13259fa64	39e70d892a1b487e00ae81b7b70491af	0.99403
f5894077625c801e89b4365be5964095	f2467b82d3b5cfa2b5d6973a1a855d78	0.99403
4ec07abdb860bda723972447dfa55ddc	c32ce62e761aa03efc16dbbe38590a82	0.99403
9e8523807c59f3603834a25cbcd86494	675f47f52ab28cdcf30e23836997082e	0.99403
79b7674106bc3fb9eccf73c5bd64bfb5	a3ce2b76a5b2daccdcc5c58ee218896a	0.99403
e34b34995e0f45e58c99616d7abe9ef8	6c553b44e9fd5caef365f5ea41f4d6f3	0.99403
675f47f52ab28cdcf30e23836997082e	7a45e5e45d7fa0edc47f2289b8334a4e	0.99403
675f47f52ab28cdcf30e23836997082e	8ed57f2c85eafc0de2666de03e90eb14	0.99403
69916a1cde832bb15ac5acc0ef5e3518	b98ca2342c154e97d19aa0130010922f	0.99403
69916a1cde832bb15ac5acc0ef5e3518	fbba10bc26152630ec70583c4fb41d7d	0.99403
3dd7c51220b26cbed0585ae27d62d3f8	39e70d892a1b487e00ae81b7b70491af	0.99403
16d19beed9098b492bb799ec5c0441d7	39e70d892a1b487e00ae81b7b70491af	0.99403
16d19beed9098b492bb799ec5c0441d7	e543abb5f12c23a50072118b9454f001	0.99403
16d19beed9098b492bb799ec5c0441d7	3a9208d106ad373e9d8528bbe6b9c5ad	0.99403
16d19beed9098b492bb799ec5c0441d7	0b5e2d9f6e0cbf6d98e778a7111c4602	0.99403
7a45e5e45d7fa0edc47f2289b8334a4e	8ed57f2c85eafc0de2666de03e90eb14	0.99403
8ed57f2c85eafc0de2666de03e90eb14	56f9c987896664bf30b7df45f17c2c30	0.99403
c4b50715602cceccd5ba14916e71bbbb	1b6b519d3d862ee5aa5f5fb031cbedd7	0.99403
39e70d892a1b487e00ae81b7b70491af	e543abb5f12c23a50072118b9454f001	0.99403
39e70d892a1b487e00ae81b7b70491af	3a9208d106ad373e9d8528bbe6b9c5ad	0.99403
39e70d892a1b487e00ae81b7b70491af	0b5e2d9f6e0cbf6d98e778a7111c4602	0.99403
0342f30ab678cb75dc7d44eb6d1f3c71	b98ca2342c154e97d19aa0130010922f	0.99403
db15ab9a45047795ca19c70acb4bee26	20dd251ae02aea592d801d239b63f9e4	0.99403
e543abb5f12c23a50072118b9454f001	3a9208d106ad373e9d8528bbe6b9c5ad	0.99403
e543abb5f12c23a50072118b9454f001	0b5e2d9f6e0cbf6d98e778a7111c4602	0.99403
0467b796cedda0e417b7e95a797eb8fd	fbba10bc26152630ec70583c4fb41d7d	0.99403
56f9c987896664bf30b7df45f17c2c30	023ec9fb40715844e7a702c82c060480	0.99403
3a9208d106ad373e9d8528bbe6b9c5ad	0b5e2d9f6e0cbf6d98e778a7111c4602	0.99403
Kbrevis	a1a830867e5263c7c5a346034d0665dd	0.94566
Kbrevis	8784c48f2e25f83675c16a766ef0a315	0.94566
Kbrevis	1040ffc55a036894e9ec2cbe47802e07	0.94566
Kbrevis	eb56533502639959923e46d4d4ce2d36	0.94566
Kbrevis	b70898de946a803c963584e6b7b27bea	0.94566
Kbrevis	f5894077625c801e89b4365be5964095	0.94566
Kbrevis	b428acd97e6af974db1b053a2bc2b5c8	0.94566
56dfd9d7e24de5f67e68506768209dca	22f26cc2c7277df74d59aa1f5adb05e4	0.94566
56dfd9d7e24de5f67e68506768209dca	33ec2672acc39980a0e805c26d08cb79	0.94566
56dfd9d7e24de5f67e68506768209dca	45ce9f54d9768cda11c5fd16fb7376f9	0.94566
56dfd9d7e24de5f67e68506768209dca	8a13f20e0e4548413b745bf51c9980b3	0.94566
56dfd9d7e24de5f67e68506768209dca	7eef68355ee10d425106b785b6fea3c0	0.94566
56dfd9d7e24de5f67e68506768209dca	34453ea17edd76b152c9eccce0400675	0.94566
56dfd9d7e24de5f67e68506768209dca	f1f38f42456ee7cfc1fa9bc7c1ee4105	0.94566
56dfd9d7e24de5f67e68506768209dca	519d9f87c7b9684dab0bac9e872e50bb	0.94566
56dfd9d7e24de5f67e68506768209dca	df5a861dbf82d100812defe4b06ce542	0.94566
56dfd9d7e24de5f67e68506768209dca	c4b50715602cceccd5ba14916e71bbbb	0.94566
56dfd9d7e24de5f67e68506768209dca	b06d1f86a1336811966c0e55dafe5152	0.94566
88f9ec475057a64bf4002030270aea28	ee127d2b4880fc0a1f416d3c6907bfea	0.94566
88f9ec475057a64bf4002030270aea28	c4b95a9b5ca76755b59ccd86ae6deba0	0.94566
88f9ec475057a64bf4002030270aea28	5e6553c89aa09df554730e0e0dcddff2	0.94566
88f9ec475057a64bf4002030270aea28	bdb19eb6ef13bfed15a7ebb821a6d403	0.94566
f1dd1bbb2b0ce8bcad3ed39593851859	0a35faf6cbcfae24b7eaebccac354133	0.94566
f1dd1bbb2b0ce8bcad3ed39593851859	bf486bb1d9da587f9f41912eee4b2e77	0.94566
f1dd1bbb2b0ce8bcad3ed39593851859	05734150853338b5e489721794a7c826	0.94566
5249b2f97c8d63c67a14cb2444d6e6b0	d8783ee923cd85c2a36a867210303e03	0.94566
5249b2f97c8d63c67a14cb2444d6e6b0	5cc2976bed9e5c72c1777004a95a44d2	0.94566
e209928576629d90c305bcb9bcde90af	c4b95a9b5ca76755b59ccd86ae6deba0	0.94566
e209928576629d90c305bcb9bcde90af	1ef2eca98f33e2c8a632157be5059bfb	0.94566
e209928576629d90c305bcb9bcde90af	1040ffc55a036894e9ec2cbe47802e07	0.94566
e209928576629d90c305bcb9bcde90af	d6165e0582a03dd12b473c294cdd3bcd	0.94566
e209928576629d90c305bcb9bcde90af	f7e7b8d4ffbc3a51d19581269876ac78	0.94566
e209928576629d90c305bcb9bcde90af	f5894077625c801e89b4365be5964095	0.94566
e209928576629d90c305bcb9bcde90af	79b7674106bc3fb9eccf73c5bd64bfb5	0.94566
e209928576629d90c305bcb9bcde90af	7a45e5e45d7fa0edc47f2289b8334a4e	0.94566
e209928576629d90c305bcb9bcde90af	56f9c987896664bf30b7df45f17c2c30	0.94566
827e158b58edb9143492782dd442a065	16bf085946684ed5fe695352fdaa04bd	0.94566
827e158b58edb9143492782dd442a065	6d9bcdb24b32c7202cf6f079065280f3	0.94566
827e158b58edb9143492782dd442a065	88e6f82436084085cc315124858fcceb	0.94566
827e158b58edb9143492782dd442a065	6916815c0ac8c809f4feffb4f33fa465	0.94566
827e158b58edb9143492782dd442a065	2caff5d38e49fbbde12d8e372e8c6c7c	0.94566
827e158b58edb9143492782dd442a065	3f1304fc1b0de80cad541bdcff9676a5	0.94566
827e158b58edb9143492782dd442a065	20dd251ae02aea592d801d239b63f9e4	0.94566
827e158b58edb9143492782dd442a065	70c3da9a368397a37246d8dcdf38f4cb	0.94566
827e158b58edb9143492782dd442a065	d9ba875ec594e62c868f973b4a4d7a05	0.94566
0d5e635df614a9c9a7b42ca3500c0d3c	9c941d1bd9eaa2157cf519e2fc7d1aed	0.94566
0d5e635df614a9c9a7b42ca3500c0d3c	d239e96a3f1ad1ebf4ed9aee42656456	0.94566
0d5e635df614a9c9a7b42ca3500c0d3c	82d44e32abc0cb731e83c993dc886c41	0.94566
0d5e635df614a9c9a7b42ca3500c0d3c	741de23dfdfb60ee191b1bf3fb3e60e7	0.94566
0d5e635df614a9c9a7b42ca3500c0d3c	3f1304fc1b0de80cad541bdcff9676a5	0.94566
0d5e635df614a9c9a7b42ca3500c0d3c	6930c6e8b05fdc647188b4f611c6a705	0.94566
0d5e635df614a9c9a7b42ca3500c0d3c	e543abb5f12c23a50072118b9454f001	0.94566
0d5e635df614a9c9a7b42ca3500c0d3c	0b5e2d9f6e0cbf6d98e778a7111c4602	0.94566
36c542375a8bbe47f1ac5c1dc0d0fed3	a05ba1ba10f7ad7834d8ae32490b920c	0.94566
36c542375a8bbe47f1ac5c1dc0d0fed3	8784c48f2e25f83675c16a766ef0a315	0.94566
36c542375a8bbe47f1ac5c1dc0d0fed3	67f59db4c23e06a8484ab88a3e520323	0.94566
36c542375a8bbe47f1ac5c1dc0d0fed3	5610f9fd4d05131f3274383ca5be7ed2	0.94566
36c542375a8bbe47f1ac5c1dc0d0fed3	eb7ad7504f3a8f3dfa3361a19fc14984	0.94566
36c542375a8bbe47f1ac5c1dc0d0fed3	8bd33e664b9a859086f52c1737c36339	0.94566
36c542375a8bbe47f1ac5c1dc0d0fed3	8ed57f2c85eafc0de2666de03e90eb14	0.94566
2df027f1916ba6adc16236ddf0fb17a6	bf486bb1d9da587f9f41912eee4b2e77	0.94566
2df027f1916ba6adc16236ddf0fb17a6	e577a29f0e642142678e3336b0404b24	0.94566
2df027f1916ba6adc16236ddf0fb17a6	6dfadde7fb5268d8c6b03f5820ed9540	0.94566
2df027f1916ba6adc16236ddf0fb17a6	a8804d65d0ea95f1b73a643fc8cd2abd	0.94566
2df027f1916ba6adc16236ddf0fb17a6	c54c0e51b015bda8d964d841302b5aaf	0.94566
2df027f1916ba6adc16236ddf0fb17a6	e5842c9c88530748259c56a35e84fb9a	0.94566
2df027f1916ba6adc16236ddf0fb17a6	d6165e0582a03dd12b473c294cdd3bcd	0.94566
2df027f1916ba6adc16236ddf0fb17a6	4201c8cbbc7f7323b35e8fbdb4f7704a	0.94566
2df027f1916ba6adc16236ddf0fb17a6	55814a4ea8a202d9b328c7b68584bf90	0.94566
2df027f1916ba6adc16236ddf0fb17a6	60da738bc4b046c5c5c7b22f77832a90	0.94566
2df027f1916ba6adc16236ddf0fb17a6	7eab0a327e61cde847742596712dcadb	0.94566
2df027f1916ba6adc16236ddf0fb17a6	0e17c2c7eab35099465e8d4b48d8afd8	0.94566
2df027f1916ba6adc16236ddf0fb17a6	8bd33e664b9a859086f52c1737c36339	0.94566
2df027f1916ba6adc16236ddf0fb17a6	741de23dfdfb60ee191b1bf3fb3e60e7	0.94566
2df027f1916ba6adc16236ddf0fb17a6	ee1b83b83a5325710d6f1cf39d7f980f	0.94566
2df027f1916ba6adc16236ddf0fb17a6	759ac655001806785218ecfb18b06a1d	0.94566
2df027f1916ba6adc16236ddf0fb17a6	1567b4dacafc28391f53de9efb63c5b9	0.94566
2df027f1916ba6adc16236ddf0fb17a6	7dee4c2d595b453d1565bfa40e967376	0.94566
2df027f1916ba6adc16236ddf0fb17a6	b42fc99cbb9150042fb31318bd88b12c	0.94566
2df027f1916ba6adc16236ddf0fb17a6	e6bf388f645d191d15b3b52d2c55325e	0.94566
2df027f1916ba6adc16236ddf0fb17a6	b092f7f3425cc2dfc9965117ab63717d	0.94566
2df027f1916ba6adc16236ddf0fb17a6	6d17ed796a25ea35dc19e67c30960976	0.94566
ee127d2b4880fc0a1f416d3c6907bfea	c4b95a9b5ca76755b59ccd86ae6deba0	0.94566
ee127d2b4880fc0a1f416d3c6907bfea	5e6553c89aa09df554730e0e0dcddff2	0.94566
ee127d2b4880fc0a1f416d3c6907bfea	bd846af2fecac1a6d4c6feb5a79c19d6	0.94566
6bb3cfdda2d01ec3bae2be8e68c469e4	ce851835782c77fa754b92d567741d8d	0.94566
6bb3cfdda2d01ec3bae2be8e68c469e4	3ceb758c49920cee71fe6e65c3493a43	0.94566
6bb3cfdda2d01ec3bae2be8e68c469e4	5100343c1e946364d20e495e3e209bc6	0.94566
6bb3cfdda2d01ec3bae2be8e68c469e4	8a13f20e0e4548413b745bf51c9980b3	0.94566
6bb3cfdda2d01ec3bae2be8e68c469e4	90a3648550c58dac0d8a380eeeb8cf17	0.94566
6bb3cfdda2d01ec3bae2be8e68c469e4	34b68b1ef916cbbfcf7e587bb154452d	0.94566
932c94ef9ab7cd5dbb25803383b81a78	012a40b76058db2b9dc546e8b24e7359	0.94566
932c94ef9ab7cd5dbb25803383b81a78	53b359329adc6fecebfc0eb42b6c0e71	0.94566
932c94ef9ab7cd5dbb25803383b81a78	4201c8cbbc7f7323b35e8fbdb4f7704a	0.94566
932c94ef9ab7cd5dbb25803383b81a78	2718b99c6ba1460433b7a3bc3c2e35a6	0.94566
f322ca331475f9f8e883a0bc356b5c64	9c941d1bd9eaa2157cf519e2fc7d1aed	0.94566
f322ca331475f9f8e883a0bc356b5c64	d239e96a3f1ad1ebf4ed9aee42656456	0.94566
f322ca331475f9f8e883a0bc356b5c64	82d44e32abc0cb731e83c993dc886c41	0.94566
f322ca331475f9f8e883a0bc356b5c64	741de23dfdfb60ee191b1bf3fb3e60e7	0.94566
f322ca331475f9f8e883a0bc356b5c64	6930c6e8b05fdc647188b4f611c6a705	0.94566
f322ca331475f9f8e883a0bc356b5c64	e543abb5f12c23a50072118b9454f001	0.94566
20cc9d134cc89f1b62860bf6bdd4046d	8299aadd889b6ed7e5ca688053e8acb5	0.94566
e92f6b23305b0d2751ffb8542f70b7b5	eda6f9881bff8aea35a15d26cc534efd	0.94566
e92f6b23305b0d2751ffb8542f70b7b5	b6be254413a7e7d160e6ca9101729245	0.94566
e92f6b23305b0d2751ffb8542f70b7b5	fa493aa4f1faf6be9820d19f83cdd969	0.94566
e92f6b23305b0d2751ffb8542f70b7b5	878ac7527f7fdf86178eaa89ab6398fe	0.94566
82ab1c4ae0247432ba9b9493cfbc6b14	e577a29f0e642142678e3336b0404b24	0.94566
82ab1c4ae0247432ba9b9493cfbc6b14	4d87d614337faa60df423f918a0978b3	0.94566
82ab1c4ae0247432ba9b9493cfbc6b14	a8804d65d0ea95f1b73a643fc8cd2abd	0.94566
82ab1c4ae0247432ba9b9493cfbc6b14	d6165e0582a03dd12b473c294cdd3bcd	0.94566
82ab1c4ae0247432ba9b9493cfbc6b14	741de23dfdfb60ee191b1bf3fb3e60e7	0.94566
82ab1c4ae0247432ba9b9493cfbc6b14	759ac655001806785218ecfb18b06a1d	0.94566
82ab1c4ae0247432ba9b9493cfbc6b14	e6bf388f645d191d15b3b52d2c55325e	0.94566
82ab1c4ae0247432ba9b9493cfbc6b14	b092f7f3425cc2dfc9965117ab63717d	0.94566
82ab1c4ae0247432ba9b9493cfbc6b14	df5a861dbf82d100812defe4b06ce542	0.94566
a1a830867e5263c7c5a346034d0665dd	a18f563b60ef31afe1d5aaf0b4331f3d	0.94566
a1a830867e5263c7c5a346034d0665dd	1e3a2aad4f8f247c7245ee7836ba20bd	0.94566
a1a830867e5263c7c5a346034d0665dd	93b2cb19723f915a805a4cd20f594f07	0.94566
a1a830867e5263c7c5a346034d0665dd	fbe36876d118508cf7e4fb67cbc032e2	0.94566
a1a830867e5263c7c5a346034d0665dd	5a51468c56dc64f4c68518fc06712dc9	0.94566
a1a830867e5263c7c5a346034d0665dd	9f3933039d989e97c9cddf12486db235	0.94566
a1a830867e5263c7c5a346034d0665dd	f77e657f16617d6eefe6c409ead568e8	0.94566
a1a830867e5263c7c5a346034d0665dd	0abe519a9a8a45aa86cceaf9f3c33f05	0.94566
a1a830867e5263c7c5a346034d0665dd	0315be37f6165f1e87335603ad7d63e9	0.94566
a1a830867e5263c7c5a346034d0665dd	4ec07abdb860bda723972447dfa55ddc	0.94566
a1a830867e5263c7c5a346034d0665dd	ccedbacba71f5225e8911acbd4552b5d	0.94566
a1a830867e5263c7c5a346034d0665dd	b428acd97e6af974db1b053a2bc2b5c8	0.94566
a1a830867e5263c7c5a346034d0665dd	f2467b82d3b5cfa2b5d6973a1a855d78	0.94566
a1a830867e5263c7c5a346034d0665dd	1b6b519d3d862ee5aa5f5fb031cbedd7	0.94566
6144a85c82e8a1270fcf3d3d9e75a21f	eb7ad7504f3a8f3dfa3361a19fc14984	0.94566
6144a85c82e8a1270fcf3d3d9e75a21f	9b1e92389ef0cc5317353e8ea8426a70	0.94566
6144a85c82e8a1270fcf3d3d9e75a21f	47591358addd7be611d87aa5fb1d0501	0.94566
0a35faf6cbcfae24b7eaebccac354133	bf486bb1d9da587f9f41912eee4b2e77	0.94566
0a35faf6cbcfae24b7eaebccac354133	05734150853338b5e489721794a7c826	0.94566
0a35faf6cbcfae24b7eaebccac354133	4cc87bf12585f95f9a1de927168e045a	0.94566
c4b95a9b5ca76755b59ccd86ae6deba0	1ef2eca98f33e2c8a632157be5059bfb	0.94566
c4b95a9b5ca76755b59ccd86ae6deba0	1040ffc55a036894e9ec2cbe47802e07	0.94566
c4b95a9b5ca76755b59ccd86ae6deba0	5e6553c89aa09df554730e0e0dcddff2	0.94566
c4b95a9b5ca76755b59ccd86ae6deba0	d6165e0582a03dd12b473c294cdd3bcd	0.94566
c4b95a9b5ca76755b59ccd86ae6deba0	bd846af2fecac1a6d4c6feb5a79c19d6	0.94566
c4b95a9b5ca76755b59ccd86ae6deba0	bdb19eb6ef13bfed15a7ebb821a6d403	0.94566
c4b95a9b5ca76755b59ccd86ae6deba0	f5894077625c801e89b4365be5964095	0.94566
c4b95a9b5ca76755b59ccd86ae6deba0	79b7674106bc3fb9eccf73c5bd64bfb5	0.94566
c4b95a9b5ca76755b59ccd86ae6deba0	7a45e5e45d7fa0edc47f2289b8334a4e	0.94566
c4b95a9b5ca76755b59ccd86ae6deba0	56f9c987896664bf30b7df45f17c2c30	0.94566
aafcb8286072f743504c5ffde9d97035	5100343c1e946364d20e495e3e209bc6	0.94566
ce851835782c77fa754b92d567741d8d	3ceb758c49920cee71fe6e65c3493a43	0.94566
ce851835782c77fa754b92d567741d8d	1c926ca8fd259c89ece07dfe79c62dfa	0.94566
ce851835782c77fa754b92d567741d8d	7fc0ccbd86b09190f44369a934b3456c	0.94566
ce851835782c77fa754b92d567741d8d	5100343c1e946364d20e495e3e209bc6	0.94566
ce851835782c77fa754b92d567741d8d	790e976dfd7c72094f38aee1b759d212	0.94566
ce851835782c77fa754b92d567741d8d	0a7cff6daea23145cea146dfb78df6df	0.94566
ce851835782c77fa754b92d567741d8d	8a13f20e0e4548413b745bf51c9980b3	0.94566
ce851835782c77fa754b92d567741d8d	0f6006dc9edddee73c4e03a918c3aa66	0.94566
ce851835782c77fa754b92d567741d8d	06c4da6859980f19124f84f1a07cf264	0.94566
ce851835782c77fa754b92d567741d8d	e131d6b9e4f997788460a450a69c3a99	0.94566
ce851835782c77fa754b92d567741d8d	64bcf94b568e9cbaa0404d841ad75435	0.94566
ce851835782c77fa754b92d567741d8d	fa493aa4f1faf6be9820d19f83cdd969	0.94566
ce851835782c77fa754b92d567741d8d	90a3648550c58dac0d8a380eeeb8cf17	0.94566
ce851835782c77fa754b92d567741d8d	0f407bb44ce651722dc620d0f9490b63	0.94566
ce851835782c77fa754b92d567741d8d	34b68b1ef916cbbfcf7e587bb154452d	0.94566
ce851835782c77fa754b92d567741d8d	b42fc99cbb9150042fb31318bd88b12c	0.94566
ce851835782c77fa754b92d567741d8d	96c5f928b96ff41ecf26e1e13259fa64	0.94566
ce851835782c77fa754b92d567741d8d	39e70d892a1b487e00ae81b7b70491af	0.94566
ce851835782c77fa754b92d567741d8d	f2816e09b5444945d9cb7c5c801d427d	0.94566
9ff870beffc06840cef39de196bcc29e	f1fec4dfaa2202d002a437cc4a248e66	0.94566
9ff870beffc06840cef39de196bcc29e	86b2330bed886db04003f3661fb61d5b	0.94566
9ff870beffc06840cef39de196bcc29e	efebe77af15ff501e89f88e27ae9ca8b	0.94566
9ff870beffc06840cef39de196bcc29e	e6f36661db6fbcff3ccc39aa0a823810	0.94566
9ff870beffc06840cef39de196bcc29e	2ffc32fd670446fa2a95b2209aaf1a9a	0.94566
9ff870beffc06840cef39de196bcc29e	08aeba14cd002cb375f0f880423b0373	0.94566
9ff870beffc06840cef39de196bcc29e	10ca86dccfe1472117a0599a1f4f1635	0.94566
9ff870beffc06840cef39de196bcc29e	88e6f82436084085cc315124858fcceb	0.94566
9ff870beffc06840cef39de196bcc29e	422efbd87a37e2b1e7b7fa621cc99374	0.94566
9ff870beffc06840cef39de196bcc29e	b9c94fb812e22b97b7af9c94291f7c4b	0.94566
9ff870beffc06840cef39de196bcc29e	5f042513c67fdd55888051594cb486ac	0.94566
9ff870beffc06840cef39de196bcc29e	6916815c0ac8c809f4feffb4f33fa465	0.94566
9ff870beffc06840cef39de196bcc29e	90a3648550c58dac0d8a380eeeb8cf17	0.94566
9ff870beffc06840cef39de196bcc29e	6fd0abbdc549c1f98e8be4248bb8dcf6	0.94566
9ff870beffc06840cef39de196bcc29e	878ac7527f7fdf86178eaa89ab6398fe	0.94566
9ff870beffc06840cef39de196bcc29e	db15ab9a45047795ca19c70acb4bee26	0.94566
e11b4263eb7a82f04b0bc4333a6bad57	fdf673791a1beb3f2d6bd09343085aa0	0.94566
e11b4263eb7a82f04b0bc4333a6bad57	d2a27974b76251f51920e40d7c7d08bd	0.94566
e11b4263eb7a82f04b0bc4333a6bad57	7b1896181def8abf5ada238339bed916	0.94566
e11b4263eb7a82f04b0bc4333a6bad57	9836a665d89d50221c106ab49a9fd5f1	0.94566
e11b4263eb7a82f04b0bc4333a6bad57	5135b86f37750dfe66b4941dbb4cf998	0.94566
e11b4263eb7a82f04b0bc4333a6bad57	80dd72ca270b553f5c7419db052fde78	0.94566
e11b4263eb7a82f04b0bc4333a6bad57	a73f97b94d85b164d70e228b442fd480	0.94566
e11b4263eb7a82f04b0bc4333a6bad57	da17572657f5636c66a5ce8c2d04922f	0.94566
e11b4263eb7a82f04b0bc4333a6bad57	6f2548da34731900e68ee1bbeed4a579	0.94566
e11b4263eb7a82f04b0bc4333a6bad57	9b1e92389ef0cc5317353e8ea8426a70	0.94566
e11b4263eb7a82f04b0bc4333a6bad57	f7d86c8f4aed4693cbdb2dfc950cc9ad	0.94566
e11b4263eb7a82f04b0bc4333a6bad57	cd98632699c5f92b428dd2337fc27563	0.94566
e11b4263eb7a82f04b0bc4333a6bad57	675f47f52ab28cdcf30e23836997082e	0.94566
e11b4263eb7a82f04b0bc4333a6bad57	7a45e5e45d7fa0edc47f2289b8334a4e	0.94566
fdf673791a1beb3f2d6bd09343085aa0	7b1896181def8abf5ada238339bed916	0.94566
fdf673791a1beb3f2d6bd09343085aa0	5135b86f37750dfe66b4941dbb4cf998	0.94566
fdf673791a1beb3f2d6bd09343085aa0	80dd72ca270b553f5c7419db052fde78	0.94566
fdf673791a1beb3f2d6bd09343085aa0	a73f97b94d85b164d70e228b442fd480	0.94566
fdf673791a1beb3f2d6bd09343085aa0	f7d86c8f4aed4693cbdb2dfc950cc9ad	0.94566
bf486bb1d9da587f9f41912eee4b2e77	6dfadde7fb5268d8c6b03f5820ed9540	0.94566
bf486bb1d9da587f9f41912eee4b2e77	e5842c9c88530748259c56a35e84fb9a	0.94566
bf486bb1d9da587f9f41912eee4b2e77	4201c8cbbc7f7323b35e8fbdb4f7704a	0.94566
bf486bb1d9da587f9f41912eee4b2e77	55814a4ea8a202d9b328c7b68584bf90	0.94566
bf486bb1d9da587f9f41912eee4b2e77	05734150853338b5e489721794a7c826	0.94566
bf486bb1d9da587f9f41912eee4b2e77	60da738bc4b046c5c5c7b22f77832a90	0.94566
bf486bb1d9da587f9f41912eee4b2e77	7eab0a327e61cde847742596712dcadb	0.94566
bf486bb1d9da587f9f41912eee4b2e77	8bd33e664b9a859086f52c1737c36339	0.94566
bf486bb1d9da587f9f41912eee4b2e77	ee1b83b83a5325710d6f1cf39d7f980f	0.94566
bf486bb1d9da587f9f41912eee4b2e77	7dee4c2d595b453d1565bfa40e967376	0.94566
bf486bb1d9da587f9f41912eee4b2e77	b42fc99cbb9150042fb31318bd88b12c	0.94566
bf486bb1d9da587f9f41912eee4b2e77	6d17ed796a25ea35dc19e67c30960976	0.94566
69a038a32cdce0e9c59aa15868003dc0	d9b7d98120e626b2f0f10e3febe8682c	0.94566
69a038a32cdce0e9c59aa15868003dc0	9c94712b0ac128883aeed3cf0cd696c7	0.94566
69a038a32cdce0e9c59aa15868003dc0	a73f97b94d85b164d70e228b442fd480	0.94566
69a038a32cdce0e9c59aa15868003dc0	3b3bbab9ab17d53dd61ce47bd1aef746	0.94566
69a038a32cdce0e9c59aa15868003dc0	8080b535f4bf339a8d5fee285ddab60b	0.94566
69a038a32cdce0e9c59aa15868003dc0	64bcf94b568e9cbaa0404d841ad75435	0.94566
c5110bc820a22854866d6b5ee21344c2	53b359329adc6fecebfc0eb42b6c0e71	0.94566
c5110bc820a22854866d6b5ee21344c2	b991efbddcb23a9ce7cf362a9a85f7dd	0.94566
c5110bc820a22854866d6b5ee21344c2	bce23b9b289bb43bff25cd148f080557	0.94566
c5110bc820a22854866d6b5ee21344c2	b100c6f62ce1fa1c32a8d86bf1166780	0.94566
c5110bc820a22854866d6b5ee21344c2	84aa4e71cb32bea23dcce02d671b2dea	0.94566
c5110bc820a22854866d6b5ee21344c2	4cdf9aeb68a51fc2fff2f82e2e682c5b	0.94566
c5110bc820a22854866d6b5ee21344c2	3dd7c51220b26cbed0585ae27d62d3f8	0.94566
012a40b76058db2b9dc546e8b24e7359	08aeba14cd002cb375f0f880423b0373	0.94566
012a40b76058db2b9dc546e8b24e7359	4201c8cbbc7f7323b35e8fbdb4f7704a	0.94566
8cf51cdf7c7c33f95196eed87ff337de	1ee948b5ef1c4af93bce919fe1350f59	0.94566
8cf51cdf7c7c33f95196eed87ff337de	dd2c4829035030d079cc39155292c30e	0.94566
8cf51cdf7c7c33f95196eed87ff337de	e543abb5f12c23a50072118b9454f001	0.94566
8cf51cdf7c7c33f95196eed87ff337de	3a9208d106ad373e9d8528bbe6b9c5ad	0.94566
d2ab948d10088c5dc2d6ebc1858bc08a	8c68c8f1ca3ceb58bd95ff2e2f7444af	0.94566
a18f563b60ef31afe1d5aaf0b4331f3d	58dc27f2b74613aea2454e8da6e2b0e5	0.94566
a18f563b60ef31afe1d5aaf0b4331f3d	6914f32d9ee2679f7f74b6d5f8f1e9e7	0.94566
a18f563b60ef31afe1d5aaf0b4331f3d	1e3a2aad4f8f247c7245ee7836ba20bd	0.94566
a18f563b60ef31afe1d5aaf0b4331f3d	93b2cb19723f915a805a4cd20f594f07	0.94566
a18f563b60ef31afe1d5aaf0b4331f3d	2e11738f8baef08f6d2f70a60a84d49c	0.94566
a18f563b60ef31afe1d5aaf0b4331f3d	fbe36876d118508cf7e4fb67cbc032e2	0.94566
a18f563b60ef31afe1d5aaf0b4331f3d	5a51468c56dc64f4c68518fc06712dc9	0.94566
a18f563b60ef31afe1d5aaf0b4331f3d	9f3933039d989e97c9cddf12486db235	0.94566
a18f563b60ef31afe1d5aaf0b4331f3d	84e422b114928ef1d913b13075ca5903	0.94566
a18f563b60ef31afe1d5aaf0b4331f3d	f77e657f16617d6eefe6c409ead568e8	0.94566
a18f563b60ef31afe1d5aaf0b4331f3d	0abe519a9a8a45aa86cceaf9f3c33f05	0.94566
a18f563b60ef31afe1d5aaf0b4331f3d	0315be37f6165f1e87335603ad7d63e9	0.94566
a18f563b60ef31afe1d5aaf0b4331f3d	4ec07abdb860bda723972447dfa55ddc	0.94566
a18f563b60ef31afe1d5aaf0b4331f3d	ccedbacba71f5225e8911acbd4552b5d	0.94566
a18f563b60ef31afe1d5aaf0b4331f3d	1b6b519d3d862ee5aa5f5fb031cbedd7	0.94566
e577a29f0e642142678e3336b0404b24	4d87d614337faa60df423f918a0978b3	0.94566
e577a29f0e642142678e3336b0404b24	a8804d65d0ea95f1b73a643fc8cd2abd	0.94566
e577a29f0e642142678e3336b0404b24	d6165e0582a03dd12b473c294cdd3bcd	0.94566
e577a29f0e642142678e3336b0404b24	60da738bc4b046c5c5c7b22f77832a90	0.94566
e577a29f0e642142678e3336b0404b24	741de23dfdfb60ee191b1bf3fb3e60e7	0.94566
e577a29f0e642142678e3336b0404b24	759ac655001806785218ecfb18b06a1d	0.94566
e577a29f0e642142678e3336b0404b24	1567b4dacafc28391f53de9efb63c5b9	0.94566
e577a29f0e642142678e3336b0404b24	e6bf388f645d191d15b3b52d2c55325e	0.94566
e577a29f0e642142678e3336b0404b24	b092f7f3425cc2dfc9965117ab63717d	0.94566
60d593dcc8007742d4962bd8ab803953	c3b7bf0e9723ee25d30372e02f56677d	0.94566
8e5281a27251d237ae4b293a88ea1fca	56f9c987896664bf30b7df45f17c2c30	0.94566
c3b7bf0e9723ee25d30372e02f56677d	dbfcd916937526065e7ad8120f2ed360	0.94566
c3b7bf0e9723ee25d30372e02f56677d	7ba3d25c1364399fcd59076c4d90732b	0.94566
3973bb919ef5f6f485a77988e67b9866	5511d7e46c7812c750470a3d28c32f4d	0.94566
3973bb919ef5f6f485a77988e67b9866	96c5f928b96ff41ecf26e1e13259fa64	0.94566
f1fec4dfaa2202d002a437cc4a248e66	86b2330bed886db04003f3661fb61d5b	0.94566
f1fec4dfaa2202d002a437cc4a248e66	efebe77af15ff501e89f88e27ae9ca8b	0.94566
f1fec4dfaa2202d002a437cc4a248e66	e6f36661db6fbcff3ccc39aa0a823810	0.94566
f1fec4dfaa2202d002a437cc4a248e66	2ffc32fd670446fa2a95b2209aaf1a9a	0.94566
f1fec4dfaa2202d002a437cc4a248e66	eb32459bd42821aedd3001b8cfbb676e	0.94566
f1fec4dfaa2202d002a437cc4a248e66	d741fb51a419da5d9265233ce7d677d4	0.94566
f1fec4dfaa2202d002a437cc4a248e66	08aeba14cd002cb375f0f880423b0373	0.94566
f1fec4dfaa2202d002a437cc4a248e66	10ca86dccfe1472117a0599a1f4f1635	0.94566
f1fec4dfaa2202d002a437cc4a248e66	88e6f82436084085cc315124858fcceb	0.94566
f1fec4dfaa2202d002a437cc4a248e66	422efbd87a37e2b1e7b7fa621cc99374	0.94566
f1fec4dfaa2202d002a437cc4a248e66	b9c94fb812e22b97b7af9c94291f7c4b	0.94566
f1fec4dfaa2202d002a437cc4a248e66	5f042513c67fdd55888051594cb486ac	0.94566
f1fec4dfaa2202d002a437cc4a248e66	6916815c0ac8c809f4feffb4f33fa465	0.94566
f1fec4dfaa2202d002a437cc4a248e66	90a3648550c58dac0d8a380eeeb8cf17	0.94566
f1fec4dfaa2202d002a437cc4a248e66	f20ee43e33f1279fad16f974401722fe	0.94566
f1fec4dfaa2202d002a437cc4a248e66	878ac7527f7fdf86178eaa89ab6398fe	0.94566
f1fec4dfaa2202d002a437cc4a248e66	db15ab9a45047795ca19c70acb4bee26	0.94566
58dc27f2b74613aea2454e8da6e2b0e5	6914f32d9ee2679f7f74b6d5f8f1e9e7	0.94566
58dc27f2b74613aea2454e8da6e2b0e5	93b2cb19723f915a805a4cd20f594f07	0.94566
58dc27f2b74613aea2454e8da6e2b0e5	2e11738f8baef08f6d2f70a60a84d49c	0.94566
58dc27f2b74613aea2454e8da6e2b0e5	84e422b114928ef1d913b13075ca5903	0.94566
58dc27f2b74613aea2454e8da6e2b0e5	4ec07abdb860bda723972447dfa55ddc	0.94566
53b359329adc6fecebfc0eb42b6c0e71	84aa4e71cb32bea23dcce02d671b2dea	0.94566
53b359329adc6fecebfc0eb42b6c0e71	3dd7c51220b26cbed0585ae27d62d3f8	0.94566
53b359329adc6fecebfc0eb42b6c0e71	2718b99c6ba1460433b7a3bc3c2e35a6	0.94566
f0ad8d0f7539cbfc185f437bd21f0e0f	bee6c2d572a23973ad932f48649b4e8c	0.94566
f0ad8d0f7539cbfc185f437bd21f0e0f	2ffc32fd670446fa2a95b2209aaf1a9a	0.94566
f0ad8d0f7539cbfc185f437bd21f0e0f	7ba3d25c1364399fcd59076c4d90732b	0.94566
f0ad8d0f7539cbfc185f437bd21f0e0f	10ca86dccfe1472117a0599a1f4f1635	0.94566
f0ad8d0f7539cbfc185f437bd21f0e0f	dd2c4829035030d079cc39155292c30e	0.94566
6dfadde7fb5268d8c6b03f5820ed9540	c54c0e51b015bda8d964d841302b5aaf	0.94566
6dfadde7fb5268d8c6b03f5820ed9540	e5842c9c88530748259c56a35e84fb9a	0.94566
6dfadde7fb5268d8c6b03f5820ed9540	9836a665d89d50221c106ab49a9fd5f1	0.94566
6dfadde7fb5268d8c6b03f5820ed9540	d1c3545aa01f01c148c8b11eef74200b	0.94566
6dfadde7fb5268d8c6b03f5820ed9540	4201c8cbbc7f7323b35e8fbdb4f7704a	0.94566
6dfadde7fb5268d8c6b03f5820ed9540	55814a4ea8a202d9b328c7b68584bf90	0.94566
6dfadde7fb5268d8c6b03f5820ed9540	da17572657f5636c66a5ce8c2d04922f	0.94566
6dfadde7fb5268d8c6b03f5820ed9540	7eab0a327e61cde847742596712dcadb	0.94566
6dfadde7fb5268d8c6b03f5820ed9540	0e17c2c7eab35099465e8d4b48d8afd8	0.94566
6dfadde7fb5268d8c6b03f5820ed9540	8bd33e664b9a859086f52c1737c36339	0.94566
6dfadde7fb5268d8c6b03f5820ed9540	ee1b83b83a5325710d6f1cf39d7f980f	0.94566
6dfadde7fb5268d8c6b03f5820ed9540	7dee4c2d595b453d1565bfa40e967376	0.94566
6dfadde7fb5268d8c6b03f5820ed9540	6d17ed796a25ea35dc19e67c30960976	0.94566
fe55a2a9399891b5d85be7e695ebf130	36f7c4e642ba4bcfe5c4bd0d9173adda	0.94566
0ad88eda91ad12012d4642bbb446f45b	82e4b4a214f2418f9f684f6e28464431	0.94566
0ad88eda91ad12012d4642bbb446f45b	56f9c987896664bf30b7df45f17c2c30	0.94566
82e4b4a214f2418f9f684f6e28464431	86b2330bed886db04003f3661fb61d5b	0.94566
82e4b4a214f2418f9f684f6e28464431	1c926ca8fd259c89ece07dfe79c62dfa	0.94566
82e4b4a214f2418f9f684f6e28464431	bf7c8b35b60d08c0bf62fc2894b0a543	0.94566
82e4b4a214f2418f9f684f6e28464431	1ee948b5ef1c4af93bce919fe1350f59	0.94566
82e4b4a214f2418f9f684f6e28464431	0f6006dc9edddee73c4e03a918c3aa66	0.94566
82e4b4a214f2418f9f684f6e28464431	b9c94fb812e22b97b7af9c94291f7c4b	0.94566
82e4b4a214f2418f9f684f6e28464431	47ca7fea12ad5495291a9c082ccab40b	0.94566
82e4b4a214f2418f9f684f6e28464431	1567b4dacafc28391f53de9efb63c5b9	0.94566
82e4b4a214f2418f9f684f6e28464431	39e70d892a1b487e00ae81b7b70491af	0.94566
82e4b4a214f2418f9f684f6e28464431	0342f30ab678cb75dc7d44eb6d1f3c71	0.94566
82e4b4a214f2418f9f684f6e28464431	56f9c987896664bf30b7df45f17c2c30	0.94566
82e4b4a214f2418f9f684f6e28464431	023ec9fb40715844e7a702c82c060480	0.94566
82e4b4a214f2418f9f684f6e28464431	0b5e2d9f6e0cbf6d98e778a7111c4602	0.94566
86b2330bed886db04003f3661fb61d5b	efebe77af15ff501e89f88e27ae9ca8b	0.94566
86b2330bed886db04003f3661fb61d5b	e6f36661db6fbcff3ccc39aa0a823810	0.94566
86b2330bed886db04003f3661fb61d5b	eb32459bd42821aedd3001b8cfbb676e	0.94566
86b2330bed886db04003f3661fb61d5b	08aeba14cd002cb375f0f880423b0373	0.94566
86b2330bed886db04003f3661fb61d5b	bf7c8b35b60d08c0bf62fc2894b0a543	0.94566
86b2330bed886db04003f3661fb61d5b	88e6f82436084085cc315124858fcceb	0.94566
86b2330bed886db04003f3661fb61d5b	eb63b799d3c4037796161ba48a0a1f56	0.94566
86b2330bed886db04003f3661fb61d5b	422efbd87a37e2b1e7b7fa621cc99374	0.94566
86b2330bed886db04003f3661fb61d5b	b9c94fb812e22b97b7af9c94291f7c4b	0.94566
86b2330bed886db04003f3661fb61d5b	6916815c0ac8c809f4feffb4f33fa465	0.94566
86b2330bed886db04003f3661fb61d5b	90a3648550c58dac0d8a380eeeb8cf17	0.94566
86b2330bed886db04003f3661fb61d5b	47ca7fea12ad5495291a9c082ccab40b	0.94566
86b2330bed886db04003f3661fb61d5b	1567b4dacafc28391f53de9efb63c5b9	0.94566
86b2330bed886db04003f3661fb61d5b	6fd0abbdc549c1f98e8be4248bb8dcf6	0.94566
86b2330bed886db04003f3661fb61d5b	0342f30ab678cb75dc7d44eb6d1f3c71	0.94566
86b2330bed886db04003f3661fb61d5b	878ac7527f7fdf86178eaa89ab6398fe	0.94566
86b2330bed886db04003f3661fb61d5b	db15ab9a45047795ca19c70acb4bee26	0.94566
3ceb758c49920cee71fe6e65c3493a43	5100343c1e946364d20e495e3e209bc6	0.94566
3ceb758c49920cee71fe6e65c3493a43	8a13f20e0e4548413b745bf51c9980b3	0.94566
3ceb758c49920cee71fe6e65c3493a43	06c4da6859980f19124f84f1a07cf264	0.94566
3ceb758c49920cee71fe6e65c3493a43	90a3648550c58dac0d8a380eeeb8cf17	0.94566
3ceb758c49920cee71fe6e65c3493a43	d27d6b231f6a4f1332b9f29d89c335e7	0.94566
e8e41c3bffbc0882edeb85a4a6a7eb94	f97c644b06dc37cb599522bdbebb00ce	0.94566
e8e41c3bffbc0882edeb85a4a6a7eb94	9e8523807c59f3603834a25cbcd86494	0.94566
9c941d1bd9eaa2157cf519e2fc7d1aed	d239e96a3f1ad1ebf4ed9aee42656456	0.94566
9c941d1bd9eaa2157cf519e2fc7d1aed	f6608e71c06674d8840e9cb8ccb2e74d	0.94566
9c941d1bd9eaa2157cf519e2fc7d1aed	82d44e32abc0cb731e83c993dc886c41	0.94566
9c941d1bd9eaa2157cf519e2fc7d1aed	741de23dfdfb60ee191b1bf3fb3e60e7	0.94566
9c941d1bd9eaa2157cf519e2fc7d1aed	6930c6e8b05fdc647188b4f611c6a705	0.94566
9c941d1bd9eaa2157cf519e2fc7d1aed	e543abb5f12c23a50072118b9454f001	0.94566
bee6c2d572a23973ad932f48649b4e8c	2ffc32fd670446fa2a95b2209aaf1a9a	0.94566
bee6c2d572a23973ad932f48649b4e8c	7ba3d25c1364399fcd59076c4d90732b	0.94566
bee6c2d572a23973ad932f48649b4e8c	10ca86dccfe1472117a0599a1f4f1635	0.94566
bee6c2d572a23973ad932f48649b4e8c	dd2c4829035030d079cc39155292c30e	0.94566
bee6c2d572a23973ad932f48649b4e8c	26e3172c82dba111de5112291a32e042	0.94566
4d87d614337faa60df423f918a0978b3	df5a861dbf82d100812defe4b06ce542	0.94566
4d87d614337faa60df423f918a0978b3	3fc31391229b05e4b66e7950f1548840	0.94566
d309d639912b9c368bc80e4a5c48bae2	b34fb0904caa8c1db6df0f5cb24da6b2	0.94566
d309d639912b9c368bc80e4a5c48bae2	6dd57d68807306a85a30f15e758134d4	0.94566
d309d639912b9c368bc80e4a5c48bae2	8ed57f2c85eafc0de2666de03e90eb14	0.94566
cc8866f3920c1a4759b779a2afe615fa	55814a4ea8a202d9b328c7b68584bf90	0.94566
cc8866f3920c1a4759b779a2afe615fa	9c94712b0ac128883aeed3cf0cd696c7	0.94566
cc8866f3920c1a4759b779a2afe615fa	0f407bb44ce651722dc620d0f9490b63	0.94566
a8804d65d0ea95f1b73a643fc8cd2abd	d6165e0582a03dd12b473c294cdd3bcd	0.94566
a8804d65d0ea95f1b73a643fc8cd2abd	60da738bc4b046c5c5c7b22f77832a90	0.94566
a8804d65d0ea95f1b73a643fc8cd2abd	741de23dfdfb60ee191b1bf3fb3e60e7	0.94566
a8804d65d0ea95f1b73a643fc8cd2abd	759ac655001806785218ecfb18b06a1d	0.94566
a8804d65d0ea95f1b73a643fc8cd2abd	1567b4dacafc28391f53de9efb63c5b9	0.94566
a8804d65d0ea95f1b73a643fc8cd2abd	e6bf388f645d191d15b3b52d2c55325e	0.94566
a8804d65d0ea95f1b73a643fc8cd2abd	b092f7f3425cc2dfc9965117ab63717d	0.94566
6914f32d9ee2679f7f74b6d5f8f1e9e7	93b2cb19723f915a805a4cd20f594f07	0.94566
6914f32d9ee2679f7f74b6d5f8f1e9e7	2e11738f8baef08f6d2f70a60a84d49c	0.94566
6914f32d9ee2679f7f74b6d5f8f1e9e7	84e422b114928ef1d913b13075ca5903	0.94566
6914f32d9ee2679f7f74b6d5f8f1e9e7	4ec07abdb860bda723972447dfa55ddc	0.94566
dbfcd916937526065e7ad8120f2ed360	7ba3d25c1364399fcd59076c4d90732b	0.94566
1e3a2aad4f8f247c7245ee7836ba20bd	93b2cb19723f915a805a4cd20f594f07	0.94566
1e3a2aad4f8f247c7245ee7836ba20bd	fbe36876d118508cf7e4fb67cbc032e2	0.94566
1e3a2aad4f8f247c7245ee7836ba20bd	5a51468c56dc64f4c68518fc06712dc9	0.94566
1e3a2aad4f8f247c7245ee7836ba20bd	9f3933039d989e97c9cddf12486db235	0.94566
1e3a2aad4f8f247c7245ee7836ba20bd	f77e657f16617d6eefe6c409ead568e8	0.94566
1e3a2aad4f8f247c7245ee7836ba20bd	0abe519a9a8a45aa86cceaf9f3c33f05	0.94566
1e3a2aad4f8f247c7245ee7836ba20bd	0315be37f6165f1e87335603ad7d63e9	0.94566
1e3a2aad4f8f247c7245ee7836ba20bd	4ec07abdb860bda723972447dfa55ddc	0.94566
1e3a2aad4f8f247c7245ee7836ba20bd	ccedbacba71f5225e8911acbd4552b5d	0.94566
1e3a2aad4f8f247c7245ee7836ba20bd	f2467b82d3b5cfa2b5d6973a1a855d78	0.94566
1e3a2aad4f8f247c7245ee7836ba20bd	1b6b519d3d862ee5aa5f5fb031cbedd7	0.94566
1c926ca8fd259c89ece07dfe79c62dfa	7fc0ccbd86b09190f44369a934b3456c	0.94566
1c926ca8fd259c89ece07dfe79c62dfa	6d9bcdb24b32c7202cf6f079065280f3	0.94566
1c926ca8fd259c89ece07dfe79c62dfa	790e976dfd7c72094f38aee1b759d212	0.94566
1c926ca8fd259c89ece07dfe79c62dfa	bf7c8b35b60d08c0bf62fc2894b0a543	0.94566
1c926ca8fd259c89ece07dfe79c62dfa	b6be254413a7e7d160e6ca9101729245	0.94566
1c926ca8fd259c89ece07dfe79c62dfa	0a7cff6daea23145cea146dfb78df6df	0.94566
1c926ca8fd259c89ece07dfe79c62dfa	eb63b799d3c4037796161ba48a0a1f56	0.94566
1c926ca8fd259c89ece07dfe79c62dfa	b9c94fb812e22b97b7af9c94291f7c4b	0.94566
1c926ca8fd259c89ece07dfe79c62dfa	e131d6b9e4f997788460a450a69c3a99	0.94566
1c926ca8fd259c89ece07dfe79c62dfa	64bcf94b568e9cbaa0404d841ad75435	0.94566
1c926ca8fd259c89ece07dfe79c62dfa	fa493aa4f1faf6be9820d19f83cdd969	0.94566
1c926ca8fd259c89ece07dfe79c62dfa	7aafbadd556b5626a3002e486eb63de0	0.94566
1c926ca8fd259c89ece07dfe79c62dfa	0f407bb44ce651722dc620d0f9490b63	0.94566
1c926ca8fd259c89ece07dfe79c62dfa	47ca7fea12ad5495291a9c082ccab40b	0.94566
1c926ca8fd259c89ece07dfe79c62dfa	1567b4dacafc28391f53de9efb63c5b9	0.94566
1c926ca8fd259c89ece07dfe79c62dfa	34b68b1ef916cbbfcf7e587bb154452d	0.94566
1c926ca8fd259c89ece07dfe79c62dfa	b42fc99cbb9150042fb31318bd88b12c	0.94566
1c926ca8fd259c89ece07dfe79c62dfa	f2816e09b5444945d9cb7c5c801d427d	0.94566
1c926ca8fd259c89ece07dfe79c62dfa	0342f30ab678cb75dc7d44eb6d1f3c71	0.94566
1c926ca8fd259c89ece07dfe79c62dfa	20dd251ae02aea592d801d239b63f9e4	0.94566
c54c0e51b015bda8d964d841302b5aaf	e5842c9c88530748259c56a35e84fb9a	0.94566
c54c0e51b015bda8d964d841302b5aaf	8784c48f2e25f83675c16a766ef0a315	0.94566
c54c0e51b015bda8d964d841302b5aaf	1040ffc55a036894e9ec2cbe47802e07	0.94566
c54c0e51b015bda8d964d841302b5aaf	9836a665d89d50221c106ab49a9fd5f1	0.94566
c54c0e51b015bda8d964d841302b5aaf	4201c8cbbc7f7323b35e8fbdb4f7704a	0.94566
c54c0e51b015bda8d964d841302b5aaf	55814a4ea8a202d9b328c7b68584bf90	0.94566
c54c0e51b015bda8d964d841302b5aaf	60da738bc4b046c5c5c7b22f77832a90	0.94566
c54c0e51b015bda8d964d841302b5aaf	da17572657f5636c66a5ce8c2d04922f	0.94566
c54c0e51b015bda8d964d841302b5aaf	7eab0a327e61cde847742596712dcadb	0.94566
c54c0e51b015bda8d964d841302b5aaf	8bd33e664b9a859086f52c1737c36339	0.94566
c54c0e51b015bda8d964d841302b5aaf	ee1b83b83a5325710d6f1cf39d7f980f	0.94566
c54c0e51b015bda8d964d841302b5aaf	eb56533502639959923e46d4d4ce2d36	0.94566
c54c0e51b015bda8d964d841302b5aaf	b70898de946a803c963584e6b7b27bea	0.94566
c54c0e51b015bda8d964d841302b5aaf	7dee4c2d595b453d1565bfa40e967376	0.94566
c54c0e51b015bda8d964d841302b5aaf	b42fc99cbb9150042fb31318bd88b12c	0.94566
c54c0e51b015bda8d964d841302b5aaf	f5894077625c801e89b4365be5964095	0.94566
c54c0e51b015bda8d964d841302b5aaf	6d17ed796a25ea35dc19e67c30960976	0.94566
cf8aee773c26f256dcd6d66e3db30a12	33ec2672acc39980a0e805c26d08cb79	0.94566
cf8aee773c26f256dcd6d66e3db30a12	6005a02ca4a778165ea119d7f2dab69f	0.94566
cf8aee773c26f256dcd6d66e3db30a12	7233e4cdaface6927d43773c964f94e4	0.94566
cf8aee773c26f256dcd6d66e3db30a12	e8caf16f88368cc1ca62882084555291	0.94566
cf8aee773c26f256dcd6d66e3db30a12	69916a1cde832bb15ac5acc0ef5e3518	0.94566
cf8aee773c26f256dcd6d66e3db30a12	0467b796cedda0e417b7e95a797eb8fd	0.94566
cf8aee773c26f256dcd6d66e3db30a12	fbba10bc26152630ec70583c4fb41d7d	0.94566
d9b7d98120e626b2f0f10e3febe8682c	64bcf94b568e9cbaa0404d841ad75435	0.94566
e5842c9c88530748259c56a35e84fb9a	9836a665d89d50221c106ab49a9fd5f1	0.94566
e5842c9c88530748259c56a35e84fb9a	4201c8cbbc7f7323b35e8fbdb4f7704a	0.94566
e5842c9c88530748259c56a35e84fb9a	60da738bc4b046c5c5c7b22f77832a90	0.94566
e5842c9c88530748259c56a35e84fb9a	da17572657f5636c66a5ce8c2d04922f	0.94566
e5842c9c88530748259c56a35e84fb9a	0e17c2c7eab35099465e8d4b48d8afd8	0.94566
e5842c9c88530748259c56a35e84fb9a	7dee4c2d595b453d1565bfa40e967376	0.94566
e5842c9c88530748259c56a35e84fb9a	b42fc99cbb9150042fb31318bd88b12c	0.94566
e5842c9c88530748259c56a35e84fb9a	6d17ed796a25ea35dc19e67c30960976	0.94566
efebe77af15ff501e89f88e27ae9ca8b	e6f36661db6fbcff3ccc39aa0a823810	0.94566
efebe77af15ff501e89f88e27ae9ca8b	2ffc32fd670446fa2a95b2209aaf1a9a	0.94566
efebe77af15ff501e89f88e27ae9ca8b	10ca86dccfe1472117a0599a1f4f1635	0.94566
efebe77af15ff501e89f88e27ae9ca8b	422efbd87a37e2b1e7b7fa621cc99374	0.94566
efebe77af15ff501e89f88e27ae9ca8b	b9c94fb812e22b97b7af9c94291f7c4b	0.94566
efebe77af15ff501e89f88e27ae9ca8b	5f042513c67fdd55888051594cb486ac	0.94566
efebe77af15ff501e89f88e27ae9ca8b	6916815c0ac8c809f4feffb4f33fa465	0.94566
efebe77af15ff501e89f88e27ae9ca8b	90a3648550c58dac0d8a380eeeb8cf17	0.94566
efebe77af15ff501e89f88e27ae9ca8b	878ac7527f7fdf86178eaa89ab6398fe	0.94566
efebe77af15ff501e89f88e27ae9ca8b	db15ab9a45047795ca19c70acb4bee26	0.94566
e6f36661db6fbcff3ccc39aa0a823810	2ffc32fd670446fa2a95b2209aaf1a9a	0.94566
e6f36661db6fbcff3ccc39aa0a823810	eb32459bd42821aedd3001b8cfbb676e	0.94566
e6f36661db6fbcff3ccc39aa0a823810	08aeba14cd002cb375f0f880423b0373	0.94566
e6f36661db6fbcff3ccc39aa0a823810	10ca86dccfe1472117a0599a1f4f1635	0.94566
e6f36661db6fbcff3ccc39aa0a823810	88e6f82436084085cc315124858fcceb	0.94566
e6f36661db6fbcff3ccc39aa0a823810	b9c94fb812e22b97b7af9c94291f7c4b	0.94566
e6f36661db6fbcff3ccc39aa0a823810	5f042513c67fdd55888051594cb486ac	0.94566
e6f36661db6fbcff3ccc39aa0a823810	6916815c0ac8c809f4feffb4f33fa465	0.94566
e6f36661db6fbcff3ccc39aa0a823810	878ac7527f7fdf86178eaa89ab6398fe	0.94566
e6f36661db6fbcff3ccc39aa0a823810	db15ab9a45047795ca19c70acb4bee26	0.94566
79b035a12b3b42cfb548824c6bdc72a4	16bf085946684ed5fe695352fdaa04bd	0.94566
93b2cb19723f915a805a4cd20f594f07	2e11738f8baef08f6d2f70a60a84d49c	0.94566
93b2cb19723f915a805a4cd20f594f07	5a51468c56dc64f4c68518fc06712dc9	0.94566
93b2cb19723f915a805a4cd20f594f07	9f3933039d989e97c9cddf12486db235	0.94566
93b2cb19723f915a805a4cd20f594f07	84e422b114928ef1d913b13075ca5903	0.94566
93b2cb19723f915a805a4cd20f594f07	f77e657f16617d6eefe6c409ead568e8	0.94566
93b2cb19723f915a805a4cd20f594f07	0abe519a9a8a45aa86cceaf9f3c33f05	0.94566
93b2cb19723f915a805a4cd20f594f07	0315be37f6165f1e87335603ad7d63e9	0.94566
93b2cb19723f915a805a4cd20f594f07	4ec07abdb860bda723972447dfa55ddc	0.94566
93b2cb19723f915a805a4cd20f594f07	ccedbacba71f5225e8911acbd4552b5d	0.94566
93b2cb19723f915a805a4cd20f594f07	f2467b82d3b5cfa2b5d6973a1a855d78	0.94566
8784c48f2e25f83675c16a766ef0a315	1040ffc55a036894e9ec2cbe47802e07	0.94566
8784c48f2e25f83675c16a766ef0a315	84e422b114928ef1d913b13075ca5903	0.94566
8784c48f2e25f83675c16a766ef0a315	eb56533502639959923e46d4d4ce2d36	0.94566
8784c48f2e25f83675c16a766ef0a315	b70898de946a803c963584e6b7b27bea	0.94566
8784c48f2e25f83675c16a766ef0a315	df976bbb8cae9501a9b0033a2df0750f	0.94566
8784c48f2e25f83675c16a766ef0a315	f5894077625c801e89b4365be5964095	0.94566
8784c48f2e25f83675c16a766ef0a315	c32ce62e761aa03efc16dbbe38590a82	0.94566
16bf085946684ed5fe695352fdaa04bd	2caff5d38e49fbbde12d8e372e8c6c7c	0.94566
1ef2eca98f33e2c8a632157be5059bfb	1040ffc55a036894e9ec2cbe47802e07	0.94566
1ef2eca98f33e2c8a632157be5059bfb	d6165e0582a03dd12b473c294cdd3bcd	0.94566
1ef2eca98f33e2c8a632157be5059bfb	93c1449aef105c81ee44691574a04fa6	0.94566
1ef2eca98f33e2c8a632157be5059bfb	4cdf9aeb68a51fc2fff2f82e2e682c5b	0.94566
1ef2eca98f33e2c8a632157be5059bfb	f5894077625c801e89b4365be5964095	0.94566
1ef2eca98f33e2c8a632157be5059bfb	79b7674106bc3fb9eccf73c5bd64bfb5	0.94566
1ef2eca98f33e2c8a632157be5059bfb	56f9c987896664bf30b7df45f17c2c30	0.94566
7fc0ccbd86b09190f44369a934b3456c	6d9bcdb24b32c7202cf6f079065280f3	0.94566
7fc0ccbd86b09190f44369a934b3456c	5511d7e46c7812c750470a3d28c32f4d	0.94566
7fc0ccbd86b09190f44369a934b3456c	d8783ee923cd85c2a36a867210303e03	0.94566
7fc0ccbd86b09190f44369a934b3456c	790e976dfd7c72094f38aee1b759d212	0.94566
7fc0ccbd86b09190f44369a934b3456c	d1c251c192e93224962dbb899cf3ea24	0.94566
7fc0ccbd86b09190f44369a934b3456c	b6be254413a7e7d160e6ca9101729245	0.94566
7fc0ccbd86b09190f44369a934b3456c	d56d487973829be6bedf092e2fc3b90e	0.94566
7fc0ccbd86b09190f44369a934b3456c	8fe69c583807bcef08f9788fd3e5ad97	0.94566
7fc0ccbd86b09190f44369a934b3456c	d239e96a3f1ad1ebf4ed9aee42656456	0.94566
7fc0ccbd86b09190f44369a934b3456c	0a7cff6daea23145cea146dfb78df6df	0.94566
7fc0ccbd86b09190f44369a934b3456c	0f6006dc9edddee73c4e03a918c3aa66	0.94566
7fc0ccbd86b09190f44369a934b3456c	e131d6b9e4f997788460a450a69c3a99	0.94566
7fc0ccbd86b09190f44369a934b3456c	64bcf94b568e9cbaa0404d841ad75435	0.94566
7fc0ccbd86b09190f44369a934b3456c	5f042513c67fdd55888051594cb486ac	0.94566
7fc0ccbd86b09190f44369a934b3456c	fa493aa4f1faf6be9820d19f83cdd969	0.94566
7fc0ccbd86b09190f44369a934b3456c	7aafbadd556b5626a3002e486eb63de0	0.94566
7fc0ccbd86b09190f44369a934b3456c	ad21821d85b6e1907c8a16adaa3c10ff	0.94566
7fc0ccbd86b09190f44369a934b3456c	0f407bb44ce651722dc620d0f9490b63	0.94566
7fc0ccbd86b09190f44369a934b3456c	759ac655001806785218ecfb18b06a1d	0.94566
7fc0ccbd86b09190f44369a934b3456c	34b68b1ef916cbbfcf7e587bb154452d	0.94566
7fc0ccbd86b09190f44369a934b3456c	b42fc99cbb9150042fb31318bd88b12c	0.94566
7fc0ccbd86b09190f44369a934b3456c	b092f7f3425cc2dfc9965117ab63717d	0.94566
7fc0ccbd86b09190f44369a934b3456c	96c5f928b96ff41ecf26e1e13259fa64	0.94566
7fc0ccbd86b09190f44369a934b3456c	a3ce2b76a5b2daccdcc5c58ee218896a	0.94566
7fc0ccbd86b09190f44369a934b3456c	16d19beed9098b492bb799ec5c0441d7	0.94566
7fc0ccbd86b09190f44369a934b3456c	39e70d892a1b487e00ae81b7b70491af	0.94566
7fc0ccbd86b09190f44369a934b3456c	f2816e09b5444945d9cb7c5c801d427d	0.94566
7fc0ccbd86b09190f44369a934b3456c	db15ab9a45047795ca19c70acb4bee26	0.94566
7fc0ccbd86b09190f44369a934b3456c	20dd251ae02aea592d801d239b63f9e4	0.94566
7fc0ccbd86b09190f44369a934b3456c	3a9208d106ad373e9d8528bbe6b9c5ad	0.94566
67f59db4c23e06a8484ab88a3e520323	eb7ad7504f3a8f3dfa3361a19fc14984	0.94566
67f59db4c23e06a8484ab88a3e520323	443164c71768102f8656148048472610	0.94566
67f59db4c23e06a8484ab88a3e520323	fbe36876d118508cf7e4fb67cbc032e2	0.94566
67f59db4c23e06a8484ab88a3e520323	8bd33e664b9a859086f52c1737c36339	0.94566
67f59db4c23e06a8484ab88a3e520323	8ed57f2c85eafc0de2666de03e90eb14	0.94566
67f59db4c23e06a8484ab88a3e520323	1b6b519d3d862ee5aa5f5fb031cbedd7	0.94566
5610f9fd4d05131f3274383ca5be7ed2	1040ffc55a036894e9ec2cbe47802e07	0.94566
5610f9fd4d05131f3274383ca5be7ed2	84e422b114928ef1d913b13075ca5903	0.94566
5610f9fd4d05131f3274383ca5be7ed2	eb56533502639959923e46d4d4ce2d36	0.94566
5610f9fd4d05131f3274383ca5be7ed2	b70898de946a803c963584e6b7b27bea	0.94566
5610f9fd4d05131f3274383ca5be7ed2	f5894077625c801e89b4365be5964095	0.94566
5610f9fd4d05131f3274383ca5be7ed2	c32ce62e761aa03efc16dbbe38590a82	0.94566
6d9bcdb24b32c7202cf6f079065280f3	5511d7e46c7812c750470a3d28c32f4d	0.94566
6d9bcdb24b32c7202cf6f079065280f3	790e976dfd7c72094f38aee1b759d212	0.94566
6d9bcdb24b32c7202cf6f079065280f3	b6be254413a7e7d160e6ca9101729245	0.94566
6d9bcdb24b32c7202cf6f079065280f3	d239e96a3f1ad1ebf4ed9aee42656456	0.94566
6d9bcdb24b32c7202cf6f079065280f3	88e6f82436084085cc315124858fcceb	0.94566
6d9bcdb24b32c7202cf6f079065280f3	0a7cff6daea23145cea146dfb78df6df	0.94566
6d9bcdb24b32c7202cf6f079065280f3	0f6006dc9edddee73c4e03a918c3aa66	0.94566
6d9bcdb24b32c7202cf6f079065280f3	e131d6b9e4f997788460a450a69c3a99	0.94566
6d9bcdb24b32c7202cf6f079065280f3	64bcf94b568e9cbaa0404d841ad75435	0.94566
6d9bcdb24b32c7202cf6f079065280f3	fa493aa4f1faf6be9820d19f83cdd969	0.94566
6d9bcdb24b32c7202cf6f079065280f3	6916815c0ac8c809f4feffb4f33fa465	0.94566
6d9bcdb24b32c7202cf6f079065280f3	7aafbadd556b5626a3002e486eb63de0	0.94566
6d9bcdb24b32c7202cf6f079065280f3	0f407bb44ce651722dc620d0f9490b63	0.94566
6d9bcdb24b32c7202cf6f079065280f3	34b68b1ef916cbbfcf7e587bb154452d	0.94566
6d9bcdb24b32c7202cf6f079065280f3	b42fc99cbb9150042fb31318bd88b12c	0.94566
6d9bcdb24b32c7202cf6f079065280f3	96c5f928b96ff41ecf26e1e13259fa64	0.94566
6d9bcdb24b32c7202cf6f079065280f3	3f1304fc1b0de80cad541bdcff9676a5	0.94566
6d9bcdb24b32c7202cf6f079065280f3	39e70d892a1b487e00ae81b7b70491af	0.94566
6d9bcdb24b32c7202cf6f079065280f3	f2816e09b5444945d9cb7c5c801d427d	0.94566
6d9bcdb24b32c7202cf6f079065280f3	70c3da9a368397a37246d8dcdf38f4cb	0.94566
6d9bcdb24b32c7202cf6f079065280f3	d9ba875ec594e62c868f973b4a4d7a05	0.94566
d2a27974b76251f51920e40d7c7d08bd	9836a665d89d50221c106ab49a9fd5f1	0.94566
d2a27974b76251f51920e40d7c7d08bd	da17572657f5636c66a5ce8c2d04922f	0.94566
d2a27974b76251f51920e40d7c7d08bd	6f2548da34731900e68ee1bbeed4a579	0.94566
d2a27974b76251f51920e40d7c7d08bd	9b1e92389ef0cc5317353e8ea8426a70	0.94566
d2a27974b76251f51920e40d7c7d08bd	cd98632699c5f92b428dd2337fc27563	0.94566
d2a27974b76251f51920e40d7c7d08bd	675f47f52ab28cdcf30e23836997082e	0.94566
d2a27974b76251f51920e40d7c7d08bd	7a45e5e45d7fa0edc47f2289b8334a4e	0.94566
ae886675883425b4c649a7478e1b7577	441b997bec002a7fe05e0ad7e4bfc14e	0.94566
ae886675883425b4c649a7478e1b7577	e34b34995e0f45e58c99616d7abe9ef8	0.94566
ae886675883425b4c649a7478e1b7577	53af9abd745b84058c0d2ae0df538470	0.94566
2ffc32fd670446fa2a95b2209aaf1a9a	eb32459bd42821aedd3001b8cfbb676e	0.94566
2ffc32fd670446fa2a95b2209aaf1a9a	7ba3d25c1364399fcd59076c4d90732b	0.94566
2ffc32fd670446fa2a95b2209aaf1a9a	08aeba14cd002cb375f0f880423b0373	0.94566
2ffc32fd670446fa2a95b2209aaf1a9a	88e6f82436084085cc315124858fcceb	0.94566
2ffc32fd670446fa2a95b2209aaf1a9a	422efbd87a37e2b1e7b7fa621cc99374	0.94566
2ffc32fd670446fa2a95b2209aaf1a9a	b9c94fb812e22b97b7af9c94291f7c4b	0.94566
2ffc32fd670446fa2a95b2209aaf1a9a	6916815c0ac8c809f4feffb4f33fa465	0.94566
2ffc32fd670446fa2a95b2209aaf1a9a	90a3648550c58dac0d8a380eeeb8cf17	0.94566
2ffc32fd670446fa2a95b2209aaf1a9a	6fd0abbdc549c1f98e8be4248bb8dcf6	0.94566
2ffc32fd670446fa2a95b2209aaf1a9a	dd2c4829035030d079cc39155292c30e	0.94566
2ffc32fd670446fa2a95b2209aaf1a9a	878ac7527f7fdf86178eaa89ab6398fe	0.94566
2ffc32fd670446fa2a95b2209aaf1a9a	db15ab9a45047795ca19c70acb4bee26	0.94566
2ffc32fd670446fa2a95b2209aaf1a9a	26e3172c82dba111de5112291a32e042	0.94566
7b1896181def8abf5ada238339bed916	5135b86f37750dfe66b4941dbb4cf998	0.94566
7b1896181def8abf5ada238339bed916	80dd72ca270b553f5c7419db052fde78	0.94566
7b1896181def8abf5ada238339bed916	a73f97b94d85b164d70e228b442fd480	0.94566
7b1896181def8abf5ada238339bed916	f7d86c8f4aed4693cbdb2dfc950cc9ad	0.94566
1040ffc55a036894e9ec2cbe47802e07	d6165e0582a03dd12b473c294cdd3bcd	0.94566
1040ffc55a036894e9ec2cbe47802e07	84e422b114928ef1d913b13075ca5903	0.94566
1040ffc55a036894e9ec2cbe47802e07	eb56533502639959923e46d4d4ce2d36	0.94566
1040ffc55a036894e9ec2cbe47802e07	b70898de946a803c963584e6b7b27bea	0.94566
1040ffc55a036894e9ec2cbe47802e07	df976bbb8cae9501a9b0033a2df0750f	0.94566
1040ffc55a036894e9ec2cbe47802e07	f5894077625c801e89b4365be5964095	0.94566
1040ffc55a036894e9ec2cbe47802e07	7a45e5e45d7fa0edc47f2289b8334a4e	0.94566
1040ffc55a036894e9ec2cbe47802e07	56f9c987896664bf30b7df45f17c2c30	0.94566
5e6553c89aa09df554730e0e0dcddff2	bd846af2fecac1a6d4c6feb5a79c19d6	0.94566
5e6553c89aa09df554730e0e0dcddff2	bdb19eb6ef13bfed15a7ebb821a6d403	0.94566
76240e87266985cc9060e1de38170bc2	6c553b44e9fd5caef365f5ea41f4d6f3	0.94566
5100343c1e946364d20e495e3e209bc6	06c4da6859980f19124f84f1a07cf264	0.94566
5100343c1e946364d20e495e3e209bc6	34b68b1ef916cbbfcf7e587bb154452d	0.94566
eb32459bd42821aedd3001b8cfbb676e	08aeba14cd002cb375f0f880423b0373	0.94566
eb32459bd42821aedd3001b8cfbb676e	10ca86dccfe1472117a0599a1f4f1635	0.94566
eb32459bd42821aedd3001b8cfbb676e	88e6f82436084085cc315124858fcceb	0.94566
eb32459bd42821aedd3001b8cfbb676e	422efbd87a37e2b1e7b7fa621cc99374	0.94566
eb32459bd42821aedd3001b8cfbb676e	b9c94fb812e22b97b7af9c94291f7c4b	0.94566
eb32459bd42821aedd3001b8cfbb676e	5f042513c67fdd55888051594cb486ac	0.94566
eb32459bd42821aedd3001b8cfbb676e	6916815c0ac8c809f4feffb4f33fa465	0.94566
eb32459bd42821aedd3001b8cfbb676e	90a3648550c58dac0d8a380eeeb8cf17	0.94566
eb32459bd42821aedd3001b8cfbb676e	878ac7527f7fdf86178eaa89ab6398fe	0.94566
eb32459bd42821aedd3001b8cfbb676e	db15ab9a45047795ca19c70acb4bee26	0.94566
5511d7e46c7812c750470a3d28c32f4d	790e976dfd7c72094f38aee1b759d212	0.94566
5511d7e46c7812c750470a3d28c32f4d	b6be254413a7e7d160e6ca9101729245	0.94566
5511d7e46c7812c750470a3d28c32f4d	0a7cff6daea23145cea146dfb78df6df	0.94566
5511d7e46c7812c750470a3d28c32f4d	e131d6b9e4f997788460a450a69c3a99	0.94566
5511d7e46c7812c750470a3d28c32f4d	64bcf94b568e9cbaa0404d841ad75435	0.94566
5511d7e46c7812c750470a3d28c32f4d	fa493aa4f1faf6be9820d19f83cdd969	0.94566
5511d7e46c7812c750470a3d28c32f4d	7aafbadd556b5626a3002e486eb63de0	0.94566
5511d7e46c7812c750470a3d28c32f4d	0f407bb44ce651722dc620d0f9490b63	0.94566
5511d7e46c7812c750470a3d28c32f4d	34b68b1ef916cbbfcf7e587bb154452d	0.94566
5511d7e46c7812c750470a3d28c32f4d	b42fc99cbb9150042fb31318bd88b12c	0.94566
5511d7e46c7812c750470a3d28c32f4d	f2816e09b5444945d9cb7c5c801d427d	0.94566
5511d7e46c7812c750470a3d28c32f4d	20dd251ae02aea592d801d239b63f9e4	0.94566
9836a665d89d50221c106ab49a9fd5f1	4201c8cbbc7f7323b35e8fbdb4f7704a	0.94566
9836a665d89d50221c106ab49a9fd5f1	55814a4ea8a202d9b328c7b68584bf90	0.94566
9836a665d89d50221c106ab49a9fd5f1	60da738bc4b046c5c5c7b22f77832a90	0.94566
9836a665d89d50221c106ab49a9fd5f1	7eab0a327e61cde847742596712dcadb	0.94566
9836a665d89d50221c106ab49a9fd5f1	6f2548da34731900e68ee1bbeed4a579	0.94566
9836a665d89d50221c106ab49a9fd5f1	0e17c2c7eab35099465e8d4b48d8afd8	0.94566
9836a665d89d50221c106ab49a9fd5f1	9b1e92389ef0cc5317353e8ea8426a70	0.94566
9836a665d89d50221c106ab49a9fd5f1	8bd33e664b9a859086f52c1737c36339	0.94566
9836a665d89d50221c106ab49a9fd5f1	ee1b83b83a5325710d6f1cf39d7f980f	0.94566
9836a665d89d50221c106ab49a9fd5f1	7dee4c2d595b453d1565bfa40e967376	0.94566
9836a665d89d50221c106ab49a9fd5f1	b42fc99cbb9150042fb31318bd88b12c	0.94566
9836a665d89d50221c106ab49a9fd5f1	675f47f52ab28cdcf30e23836997082e	0.94566
9836a665d89d50221c106ab49a9fd5f1	7a45e5e45d7fa0edc47f2289b8334a4e	0.94566
9836a665d89d50221c106ab49a9fd5f1	6d17ed796a25ea35dc19e67c30960976	0.94566
7ba3d25c1364399fcd59076c4d90732b	10ca86dccfe1472117a0599a1f4f1635	0.94566
7ba3d25c1364399fcd59076c4d90732b	dd2c4829035030d079cc39155292c30e	0.94566
7ba3d25c1364399fcd59076c4d90732b	26e3172c82dba111de5112291a32e042	0.94566
5becdcb4c3c8cfac25525c0b7e4ff555	8c68c8f1ca3ceb58bd95ff2e2f7444af	0.94566
5becdcb4c3c8cfac25525c0b7e4ff555	6930c6e8b05fdc647188b4f611c6a705	0.94566
76d2032108822bcfaa90a4873f7a51aa	68b6f352877ccbaddbc5ebbdcd2c87a4	0.94566
eb7ad7504f3a8f3dfa3361a19fc14984	8bd33e664b9a859086f52c1737c36339	0.94566
d741fb51a419da5d9265233ce7d677d4	f20ee43e33f1279fad16f974401722fe	0.94566
d6165e0582a03dd12b473c294cdd3bcd	60da738bc4b046c5c5c7b22f77832a90	0.94566
d6165e0582a03dd12b473c294cdd3bcd	1567b4dacafc28391f53de9efb63c5b9	0.94566
d6165e0582a03dd12b473c294cdd3bcd	e6bf388f645d191d15b3b52d2c55325e	0.94566
d6165e0582a03dd12b473c294cdd3bcd	f5894077625c801e89b4365be5964095	0.94566
d6165e0582a03dd12b473c294cdd3bcd	79b7674106bc3fb9eccf73c5bd64bfb5	0.94566
d6165e0582a03dd12b473c294cdd3bcd	7a45e5e45d7fa0edc47f2289b8334a4e	0.94566
d6165e0582a03dd12b473c294cdd3bcd	56f9c987896664bf30b7df45f17c2c30	0.94566
08aeba14cd002cb375f0f880423b0373	10ca86dccfe1472117a0599a1f4f1635	0.94566
08aeba14cd002cb375f0f880423b0373	422efbd87a37e2b1e7b7fa621cc99374	0.94566
08aeba14cd002cb375f0f880423b0373	b9c94fb812e22b97b7af9c94291f7c4b	0.94566
08aeba14cd002cb375f0f880423b0373	5f042513c67fdd55888051594cb486ac	0.94566
08aeba14cd002cb375f0f880423b0373	6916815c0ac8c809f4feffb4f33fa465	0.94566
08aeba14cd002cb375f0f880423b0373	90a3648550c58dac0d8a380eeeb8cf17	0.94566
08aeba14cd002cb375f0f880423b0373	6fd0abbdc549c1f98e8be4248bb8dcf6	0.94566
08aeba14cd002cb375f0f880423b0373	878ac7527f7fdf86178eaa89ab6398fe	0.94566
d8783ee923cd85c2a36a867210303e03	d1c251c192e93224962dbb899cf3ea24	0.94566
d8783ee923cd85c2a36a867210303e03	d56d487973829be6bedf092e2fc3b90e	0.94566
d8783ee923cd85c2a36a867210303e03	3b3bbab9ab17d53dd61ce47bd1aef746	0.94566
d8783ee923cd85c2a36a867210303e03	5f042513c67fdd55888051594cb486ac	0.94566
d8783ee923cd85c2a36a867210303e03	ad21821d85b6e1907c8a16adaa3c10ff	0.94566
d8783ee923cd85c2a36a867210303e03	759ac655001806785218ecfb18b06a1d	0.94566
d8783ee923cd85c2a36a867210303e03	5cc2976bed9e5c72c1777004a95a44d2	0.94566
d8783ee923cd85c2a36a867210303e03	b092f7f3425cc2dfc9965117ab63717d	0.94566
d8783ee923cd85c2a36a867210303e03	a3ce2b76a5b2daccdcc5c58ee218896a	0.94566
d8783ee923cd85c2a36a867210303e03	db15ab9a45047795ca19c70acb4bee26	0.94566
d8783ee923cd85c2a36a867210303e03	3a9208d106ad373e9d8528bbe6b9c5ad	0.94566
eda6f9881bff8aea35a15d26cc534efd	b6be254413a7e7d160e6ca9101729245	0.94566
eda6f9881bff8aea35a15d26cc534efd	fa493aa4f1faf6be9820d19f83cdd969	0.94566
eda6f9881bff8aea35a15d26cc534efd	878ac7527f7fdf86178eaa89ab6398fe	0.94566
9002f85b03d9dcb79bdf61619b029a94	7cfed4230313e2ab5c148fe5aa34fe1c	0.94566
5135b86f37750dfe66b4941dbb4cf998	80dd72ca270b553f5c7419db052fde78	0.94566
5135b86f37750dfe66b4941dbb4cf998	a73f97b94d85b164d70e228b442fd480	0.94566
10ca86dccfe1472117a0599a1f4f1635	88e6f82436084085cc315124858fcceb	0.94566
10ca86dccfe1472117a0599a1f4f1635	422efbd87a37e2b1e7b7fa621cc99374	0.94566
10ca86dccfe1472117a0599a1f4f1635	b9c94fb812e22b97b7af9c94291f7c4b	0.94566
10ca86dccfe1472117a0599a1f4f1635	6916815c0ac8c809f4feffb4f33fa465	0.94566
10ca86dccfe1472117a0599a1f4f1635	90a3648550c58dac0d8a380eeeb8cf17	0.94566
10ca86dccfe1472117a0599a1f4f1635	6fd0abbdc549c1f98e8be4248bb8dcf6	0.94566
10ca86dccfe1472117a0599a1f4f1635	dd2c4829035030d079cc39155292c30e	0.94566
10ca86dccfe1472117a0599a1f4f1635	878ac7527f7fdf86178eaa89ab6398fe	0.94566
10ca86dccfe1472117a0599a1f4f1635	db15ab9a45047795ca19c70acb4bee26	0.94566
10ca86dccfe1472117a0599a1f4f1635	26e3172c82dba111de5112291a32e042	0.94566
8645ac02dc586fcd4a083b94279834f7	8299aadd889b6ed7e5ca688053e8acb5	0.94566
8645ac02dc586fcd4a083b94279834f7	b98ca2342c154e97d19aa0130010922f	0.94566
2e11738f8baef08f6d2f70a60a84d49c	84e422b114928ef1d913b13075ca5903	0.94566
2e11738f8baef08f6d2f70a60a84d49c	4ec07abdb860bda723972447dfa55ddc	0.94566
22f26cc2c7277df74d59aa1f5adb05e4	33ec2672acc39980a0e805c26d08cb79	0.94566
22f26cc2c7277df74d59aa1f5adb05e4	45ce9f54d9768cda11c5fd16fb7376f9	0.94566
22f26cc2c7277df74d59aa1f5adb05e4	8a13f20e0e4548413b745bf51c9980b3	0.94566
22f26cc2c7277df74d59aa1f5adb05e4	7eef68355ee10d425106b785b6fea3c0	0.94566
22f26cc2c7277df74d59aa1f5adb05e4	34453ea17edd76b152c9eccce0400675	0.94566
22f26cc2c7277df74d59aa1f5adb05e4	519d9f87c7b9684dab0bac9e872e50bb	0.94566
22f26cc2c7277df74d59aa1f5adb05e4	df5a861dbf82d100812defe4b06ce542	0.94566
22f26cc2c7277df74d59aa1f5adb05e4	c4b50715602cceccd5ba14916e71bbbb	0.94566
33ec2672acc39980a0e805c26d08cb79	6005a02ca4a778165ea119d7f2dab69f	0.94566
33ec2672acc39980a0e805c26d08cb79	45ce9f54d9768cda11c5fd16fb7376f9	0.94566
33ec2672acc39980a0e805c26d08cb79	7233e4cdaface6927d43773c964f94e4	0.94566
33ec2672acc39980a0e805c26d08cb79	8a13f20e0e4548413b745bf51c9980b3	0.94566
33ec2672acc39980a0e805c26d08cb79	7eef68355ee10d425106b785b6fea3c0	0.94566
33ec2672acc39980a0e805c26d08cb79	34453ea17edd76b152c9eccce0400675	0.94566
33ec2672acc39980a0e805c26d08cb79	e8caf16f88368cc1ca62882084555291	0.94566
33ec2672acc39980a0e805c26d08cb79	69916a1cde832bb15ac5acc0ef5e3518	0.94566
33ec2672acc39980a0e805c26d08cb79	519d9f87c7b9684dab0bac9e872e50bb	0.94566
33ec2672acc39980a0e805c26d08cb79	df5a861dbf82d100812defe4b06ce542	0.94566
33ec2672acc39980a0e805c26d08cb79	c4b50715602cceccd5ba14916e71bbbb	0.94566
33ec2672acc39980a0e805c26d08cb79	0467b796cedda0e417b7e95a797eb8fd	0.94566
33ec2672acc39980a0e805c26d08cb79	fbba10bc26152630ec70583c4fb41d7d	0.94566
790e976dfd7c72094f38aee1b759d212	b6be254413a7e7d160e6ca9101729245	0.94566
790e976dfd7c72094f38aee1b759d212	d239e96a3f1ad1ebf4ed9aee42656456	0.94566
790e976dfd7c72094f38aee1b759d212	0a7cff6daea23145cea146dfb78df6df	0.94566
790e976dfd7c72094f38aee1b759d212	0f6006dc9edddee73c4e03a918c3aa66	0.94566
790e976dfd7c72094f38aee1b759d212	e131d6b9e4f997788460a450a69c3a99	0.94566
790e976dfd7c72094f38aee1b759d212	64bcf94b568e9cbaa0404d841ad75435	0.94566
790e976dfd7c72094f38aee1b759d212	fa493aa4f1faf6be9820d19f83cdd969	0.94566
790e976dfd7c72094f38aee1b759d212	7aafbadd556b5626a3002e486eb63de0	0.94566
790e976dfd7c72094f38aee1b759d212	0f407bb44ce651722dc620d0f9490b63	0.94566
790e976dfd7c72094f38aee1b759d212	34b68b1ef916cbbfcf7e587bb154452d	0.94566
790e976dfd7c72094f38aee1b759d212	96c5f928b96ff41ecf26e1e13259fa64	0.94566
790e976dfd7c72094f38aee1b759d212	39e70d892a1b487e00ae81b7b70491af	0.94566
790e976dfd7c72094f38aee1b759d212	f2816e09b5444945d9cb7c5c801d427d	0.94566
790e976dfd7c72094f38aee1b759d212	20dd251ae02aea592d801d239b63f9e4	0.94566
6005a02ca4a778165ea119d7f2dab69f	7233e4cdaface6927d43773c964f94e4	0.94566
6005a02ca4a778165ea119d7f2dab69f	6f70472a37bc090d135fd6a3cb14823f	0.94566
6005a02ca4a778165ea119d7f2dab69f	e8caf16f88368cc1ca62882084555291	0.94566
443164c71768102f8656148048472610	fbe36876d118508cf7e4fb67cbc032e2	0.94566
443164c71768102f8656148048472610	1b6b519d3d862ee5aa5f5fb031cbedd7	0.94566
e74a94435f9a11aa7948c36985932c84	64bcf94b568e9cbaa0404d841ad75435	0.94566
36f7c4e642ba4bcfe5c4bd0d9173adda	2572e8056b65129f70695e5c4dbf8a2d	0.94566
e7738cf0bb82ac429231fb6fded5e47a	68b6f352877ccbaddbc5ebbdcd2c87a4	0.94566
4201c8cbbc7f7323b35e8fbdb4f7704a	55814a4ea8a202d9b328c7b68584bf90	0.94566
4201c8cbbc7f7323b35e8fbdb4f7704a	60da738bc4b046c5c5c7b22f77832a90	0.94566
4201c8cbbc7f7323b35e8fbdb4f7704a	da17572657f5636c66a5ce8c2d04922f	0.94566
4201c8cbbc7f7323b35e8fbdb4f7704a	7eab0a327e61cde847742596712dcadb	0.94566
4201c8cbbc7f7323b35e8fbdb4f7704a	0e17c2c7eab35099465e8d4b48d8afd8	0.94566
4201c8cbbc7f7323b35e8fbdb4f7704a	8bd33e664b9a859086f52c1737c36339	0.94566
4201c8cbbc7f7323b35e8fbdb4f7704a	ee1b83b83a5325710d6f1cf39d7f980f	0.94566
4201c8cbbc7f7323b35e8fbdb4f7704a	b42fc99cbb9150042fb31318bd88b12c	0.94566
4201c8cbbc7f7323b35e8fbdb4f7704a	6d17ed796a25ea35dc19e67c30960976	0.94566
7cfed4230313e2ab5c148fe5aa34fe1c	1659d7acb4a55ff27e3cbfc218639b9c	0.94566
fbe36876d118508cf7e4fb67cbc032e2	5a51468c56dc64f4c68518fc06712dc9	0.94566
fbe36876d118508cf7e4fb67cbc032e2	9f3933039d989e97c9cddf12486db235	0.94566
fbe36876d118508cf7e4fb67cbc032e2	f77e657f16617d6eefe6c409ead568e8	0.94566
fbe36876d118508cf7e4fb67cbc032e2	0abe519a9a8a45aa86cceaf9f3c33f05	0.94566
fbe36876d118508cf7e4fb67cbc032e2	0315be37f6165f1e87335603ad7d63e9	0.94566
fbe36876d118508cf7e4fb67cbc032e2	ccedbacba71f5225e8911acbd4552b5d	0.94566
fbe36876d118508cf7e4fb67cbc032e2	f2467b82d3b5cfa2b5d6973a1a855d78	0.94566
fbe36876d118508cf7e4fb67cbc032e2	1b6b519d3d862ee5aa5f5fb031cbedd7	0.94566
c5d6b14e6d887844fc9df15b83ebf099	14525301bb4271314d10e75fe308a602	0.94566
d1c251c192e93224962dbb899cf3ea24	d56d487973829be6bedf092e2fc3b90e	0.94566
d1c251c192e93224962dbb899cf3ea24	3b3bbab9ab17d53dd61ce47bd1aef746	0.94566
d1c251c192e93224962dbb899cf3ea24	5f042513c67fdd55888051594cb486ac	0.94566
d1c251c192e93224962dbb899cf3ea24	759ac655001806785218ecfb18b06a1d	0.94566
d1c251c192e93224962dbb899cf3ea24	b092f7f3425cc2dfc9965117ab63717d	0.94566
d1c251c192e93224962dbb899cf3ea24	a3ce2b76a5b2daccdcc5c58ee218896a	0.94566
d1c251c192e93224962dbb899cf3ea24	db15ab9a45047795ca19c70acb4bee26	0.94566
d1c251c192e93224962dbb899cf3ea24	3a9208d106ad373e9d8528bbe6b9c5ad	0.94566
80dd72ca270b553f5c7419db052fde78	a73f97b94d85b164d70e228b442fd480	0.94566
80dd72ca270b553f5c7419db052fde78	f7d86c8f4aed4693cbdb2dfc950cc9ad	0.94566
801463e61abcfcc2938e84e16c3929d6	8e422b0b6170093273f54d40542df24c	0.94566
5a51468c56dc64f4c68518fc06712dc9	9f3933039d989e97c9cddf12486db235	0.94566
5a51468c56dc64f4c68518fc06712dc9	f77e657f16617d6eefe6c409ead568e8	0.94566
5a51468c56dc64f4c68518fc06712dc9	0abe519a9a8a45aa86cceaf9f3c33f05	0.94566
5a51468c56dc64f4c68518fc06712dc9	0315be37f6165f1e87335603ad7d63e9	0.94566
5a51468c56dc64f4c68518fc06712dc9	4ec07abdb860bda723972447dfa55ddc	0.94566
5a51468c56dc64f4c68518fc06712dc9	ccedbacba71f5225e8911acbd4552b5d	0.94566
5a51468c56dc64f4c68518fc06712dc9	f2467b82d3b5cfa2b5d6973a1a855d78	0.94566
5a51468c56dc64f4c68518fc06712dc9	1b6b519d3d862ee5aa5f5fb031cbedd7	0.94566
bf7c8b35b60d08c0bf62fc2894b0a543	eb63b799d3c4037796161ba48a0a1f56	0.94566
bf7c8b35b60d08c0bf62fc2894b0a543	1ee948b5ef1c4af93bce919fe1350f59	0.94566
bf7c8b35b60d08c0bf62fc2894b0a543	0f6006dc9edddee73c4e03a918c3aa66	0.94566
bf7c8b35b60d08c0bf62fc2894b0a543	b9c94fb812e22b97b7af9c94291f7c4b	0.94566
bf7c8b35b60d08c0bf62fc2894b0a543	47ca7fea12ad5495291a9c082ccab40b	0.94566
bf7c8b35b60d08c0bf62fc2894b0a543	1567b4dacafc28391f53de9efb63c5b9	0.94566
bf7c8b35b60d08c0bf62fc2894b0a543	39e70d892a1b487e00ae81b7b70491af	0.94566
bf7c8b35b60d08c0bf62fc2894b0a543	0b5e2d9f6e0cbf6d98e778a7111c4602	0.94566
b6be254413a7e7d160e6ca9101729245	d239e96a3f1ad1ebf4ed9aee42656456	0.94566
b6be254413a7e7d160e6ca9101729245	0a7cff6daea23145cea146dfb78df6df	0.94566
b6be254413a7e7d160e6ca9101729245	0f6006dc9edddee73c4e03a918c3aa66	0.94566
b6be254413a7e7d160e6ca9101729245	e131d6b9e4f997788460a450a69c3a99	0.94566
b6be254413a7e7d160e6ca9101729245	64bcf94b568e9cbaa0404d841ad75435	0.94566
b6be254413a7e7d160e6ca9101729245	fa493aa4f1faf6be9820d19f83cdd969	0.94566
b6be254413a7e7d160e6ca9101729245	7aafbadd556b5626a3002e486eb63de0	0.94566
b6be254413a7e7d160e6ca9101729245	0f407bb44ce651722dc620d0f9490b63	0.94566
b6be254413a7e7d160e6ca9101729245	b42fc99cbb9150042fb31318bd88b12c	0.94566
b6be254413a7e7d160e6ca9101729245	96c5f928b96ff41ecf26e1e13259fa64	0.94566
b6be254413a7e7d160e6ca9101729245	39e70d892a1b487e00ae81b7b70491af	0.94566
b6be254413a7e7d160e6ca9101729245	f2816e09b5444945d9cb7c5c801d427d	0.94566
b6be254413a7e7d160e6ca9101729245	20dd251ae02aea592d801d239b63f9e4	0.94566
55814a4ea8a202d9b328c7b68584bf90	60da738bc4b046c5c5c7b22f77832a90	0.94566
55814a4ea8a202d9b328c7b68584bf90	da17572657f5636c66a5ce8c2d04922f	0.94566
55814a4ea8a202d9b328c7b68584bf90	0e17c2c7eab35099465e8d4b48d8afd8	0.94566
55814a4ea8a202d9b328c7b68584bf90	8bd33e664b9a859086f52c1737c36339	0.94566
55814a4ea8a202d9b328c7b68584bf90	7dee4c2d595b453d1565bfa40e967376	0.94566
55814a4ea8a202d9b328c7b68584bf90	b42fc99cbb9150042fb31318bd88b12c	0.94566
55814a4ea8a202d9b328c7b68584bf90	6d17ed796a25ea35dc19e67c30960976	0.94566
45ce9f54d9768cda11c5fd16fb7376f9	7eef68355ee10d425106b785b6fea3c0	0.94566
45ce9f54d9768cda11c5fd16fb7376f9	34453ea17edd76b152c9eccce0400675	0.94566
45ce9f54d9768cda11c5fd16fb7376f9	519d9f87c7b9684dab0bac9e872e50bb	0.94566
45ce9f54d9768cda11c5fd16fb7376f9	df5a861dbf82d100812defe4b06ce542	0.94566
45ce9f54d9768cda11c5fd16fb7376f9	c4b50715602cceccd5ba14916e71bbbb	0.94566
d56d487973829be6bedf092e2fc3b90e	3b3bbab9ab17d53dd61ce47bd1aef746	0.94566
d56d487973829be6bedf092e2fc3b90e	5f042513c67fdd55888051594cb486ac	0.94566
d56d487973829be6bedf092e2fc3b90e	ad21821d85b6e1907c8a16adaa3c10ff	0.94566
d56d487973829be6bedf092e2fc3b90e	a3ce2b76a5b2daccdcc5c58ee218896a	0.94566
d56d487973829be6bedf092e2fc3b90e	db15ab9a45047795ca19c70acb4bee26	0.94566
d56d487973829be6bedf092e2fc3b90e	3a9208d106ad373e9d8528bbe6b9c5ad	0.94566
8fe69c583807bcef08f9788fd3e5ad97	3b3bbab9ab17d53dd61ce47bd1aef746	0.94566
8fe69c583807bcef08f9788fd3e5ad97	a3ce2b76a5b2daccdcc5c58ee218896a	0.94566
8fe69c583807bcef08f9788fd3e5ad97	db15ab9a45047795ca19c70acb4bee26	0.94566
d239e96a3f1ad1ebf4ed9aee42656456	0a7cff6daea23145cea146dfb78df6df	0.94566
d239e96a3f1ad1ebf4ed9aee42656456	f6608e71c06674d8840e9cb8ccb2e74d	0.94566
d239e96a3f1ad1ebf4ed9aee42656456	e131d6b9e4f997788460a450a69c3a99	0.94566
d239e96a3f1ad1ebf4ed9aee42656456	82d44e32abc0cb731e83c993dc886c41	0.94566
d239e96a3f1ad1ebf4ed9aee42656456	64bcf94b568e9cbaa0404d841ad75435	0.94566
d239e96a3f1ad1ebf4ed9aee42656456	fa493aa4f1faf6be9820d19f83cdd969	0.94566
d239e96a3f1ad1ebf4ed9aee42656456	7aafbadd556b5626a3002e486eb63de0	0.94566
d239e96a3f1ad1ebf4ed9aee42656456	0f407bb44ce651722dc620d0f9490b63	0.94566
d239e96a3f1ad1ebf4ed9aee42656456	34b68b1ef916cbbfcf7e587bb154452d	0.94566
d239e96a3f1ad1ebf4ed9aee42656456	b42fc99cbb9150042fb31318bd88b12c	0.94566
d239e96a3f1ad1ebf4ed9aee42656456	6930c6e8b05fdc647188b4f611c6a705	0.94566
d239e96a3f1ad1ebf4ed9aee42656456	f2816e09b5444945d9cb7c5c801d427d	0.94566
d239e96a3f1ad1ebf4ed9aee42656456	20dd251ae02aea592d801d239b63f9e4	0.94566
60da738bc4b046c5c5c7b22f77832a90	da17572657f5636c66a5ce8c2d04922f	0.94566
60da738bc4b046c5c5c7b22f77832a90	7eab0a327e61cde847742596712dcadb	0.94566
60da738bc4b046c5c5c7b22f77832a90	0e17c2c7eab35099465e8d4b48d8afd8	0.94566
60da738bc4b046c5c5c7b22f77832a90	8bd33e664b9a859086f52c1737c36339	0.94566
60da738bc4b046c5c5c7b22f77832a90	741de23dfdfb60ee191b1bf3fb3e60e7	0.94566
60da738bc4b046c5c5c7b22f77832a90	ee1b83b83a5325710d6f1cf39d7f980f	0.94566
60da738bc4b046c5c5c7b22f77832a90	759ac655001806785218ecfb18b06a1d	0.94566
60da738bc4b046c5c5c7b22f77832a90	7dee4c2d595b453d1565bfa40e967376	0.94566
60da738bc4b046c5c5c7b22f77832a90	e6bf388f645d191d15b3b52d2c55325e	0.94566
60da738bc4b046c5c5c7b22f77832a90	b092f7f3425cc2dfc9965117ab63717d	0.94566
60da738bc4b046c5c5c7b22f77832a90	6d17ed796a25ea35dc19e67c30960976	0.94566
187566145fbeed598c7fa7e1d0f56893	bfc979fbc3bc5a4801c52c99b2891336	0.94566
88e6f82436084085cc315124858fcceb	422efbd87a37e2b1e7b7fa621cc99374	0.94566
88e6f82436084085cc315124858fcceb	b9c94fb812e22b97b7af9c94291f7c4b	0.94566
88e6f82436084085cc315124858fcceb	5f042513c67fdd55888051594cb486ac	0.94566
88e6f82436084085cc315124858fcceb	6916815c0ac8c809f4feffb4f33fa465	0.94566
88e6f82436084085cc315124858fcceb	90a3648550c58dac0d8a380eeeb8cf17	0.94566
88e6f82436084085cc315124858fcceb	6fd0abbdc549c1f98e8be4248bb8dcf6	0.94566
88e6f82436084085cc315124858fcceb	3f1304fc1b0de80cad541bdcff9676a5	0.94566
88e6f82436084085cc315124858fcceb	878ac7527f7fdf86178eaa89ab6398fe	0.94566
88e6f82436084085cc315124858fcceb	db15ab9a45047795ca19c70acb4bee26	0.94566
88e6f82436084085cc315124858fcceb	20dd251ae02aea592d801d239b63f9e4	0.94566
88e6f82436084085cc315124858fcceb	d9ba875ec594e62c868f973b4a4d7a05	0.94566
bd846af2fecac1a6d4c6feb5a79c19d6	bdb19eb6ef13bfed15a7ebb821a6d403	0.94566
9f3933039d989e97c9cddf12486db235	0abe519a9a8a45aa86cceaf9f3c33f05	0.94566
9f3933039d989e97c9cddf12486db235	4ec07abdb860bda723972447dfa55ddc	0.94566
9f3933039d989e97c9cddf12486db235	ccedbacba71f5225e8911acbd4552b5d	0.94566
9f3933039d989e97c9cddf12486db235	1b6b519d3d862ee5aa5f5fb031cbedd7	0.94566
8299aadd889b6ed7e5ca688053e8acb5	b98ca2342c154e97d19aa0130010922f	0.94566
0a7cff6daea23145cea146dfb78df6df	e131d6b9e4f997788460a450a69c3a99	0.94566
0a7cff6daea23145cea146dfb78df6df	f76d0ff8b2a18523b391183ec0615549	0.94566
0a7cff6daea23145cea146dfb78df6df	64bcf94b568e9cbaa0404d841ad75435	0.94566
0a7cff6daea23145cea146dfb78df6df	fa493aa4f1faf6be9820d19f83cdd969	0.94566
0a7cff6daea23145cea146dfb78df6df	7aafbadd556b5626a3002e486eb63de0	0.94566
0a7cff6daea23145cea146dfb78df6df	0f407bb44ce651722dc620d0f9490b63	0.94566
0a7cff6daea23145cea146dfb78df6df	34b68b1ef916cbbfcf7e587bb154452d	0.94566
0a7cff6daea23145cea146dfb78df6df	f7e7b8d4ffbc3a51d19581269876ac78	0.94566
0a7cff6daea23145cea146dfb78df6df	aa13b33f5e1937ef92b901d75f190fbe	0.94566
0a7cff6daea23145cea146dfb78df6df	f2816e09b5444945d9cb7c5c801d427d	0.94566
0a7cff6daea23145cea146dfb78df6df	20dd251ae02aea592d801d239b63f9e4	0.94566
7233e4cdaface6927d43773c964f94e4	e8caf16f88368cc1ca62882084555291	0.94566
7233e4cdaface6927d43773c964f94e4	69916a1cde832bb15ac5acc0ef5e3518	0.94566
7233e4cdaface6927d43773c964f94e4	7f02f8891c18a78c1ca3b37b4aa5ee79	0.94566
7233e4cdaface6927d43773c964f94e4	0467b796cedda0e417b7e95a797eb8fd	0.94566
7233e4cdaface6927d43773c964f94e4	fbba10bc26152630ec70583c4fb41d7d	0.94566
84e422b114928ef1d913b13075ca5903	eb56533502639959923e46d4d4ce2d36	0.94566
84e422b114928ef1d913b13075ca5903	b70898de946a803c963584e6b7b27bea	0.94566
84e422b114928ef1d913b13075ca5903	f5894077625c801e89b4365be5964095	0.94566
9c94712b0ac128883aeed3cf0cd696c7	a73f97b94d85b164d70e228b442fd480	0.94566
9c94712b0ac128883aeed3cf0cd696c7	8080b535f4bf339a8d5fee285ddab60b	0.94566
9c94712b0ac128883aeed3cf0cd696c7	0f407bb44ce651722dc620d0f9490b63	0.94566
a73f97b94d85b164d70e228b442fd480	3b3bbab9ab17d53dd61ce47bd1aef746	0.94566
a73f97b94d85b164d70e228b442fd480	f7d86c8f4aed4693cbdb2dfc950cc9ad	0.94566
3b3bbab9ab17d53dd61ce47bd1aef746	8080b535f4bf339a8d5fee285ddab60b	0.94566
3b3bbab9ab17d53dd61ce47bd1aef746	5f042513c67fdd55888051594cb486ac	0.94566
3b3bbab9ab17d53dd61ce47bd1aef746	ad21821d85b6e1907c8a16adaa3c10ff	0.94566
3b3bbab9ab17d53dd61ce47bd1aef746	759ac655001806785218ecfb18b06a1d	0.94566
3b3bbab9ab17d53dd61ce47bd1aef746	b092f7f3425cc2dfc9965117ab63717d	0.94566
3b3bbab9ab17d53dd61ce47bd1aef746	a3ce2b76a5b2daccdcc5c58ee218896a	0.94566
3b3bbab9ab17d53dd61ce47bd1aef746	16d19beed9098b492bb799ec5c0441d7	0.94566
3b3bbab9ab17d53dd61ce47bd1aef746	3a9208d106ad373e9d8528bbe6b9c5ad	0.94566
441b997bec002a7fe05e0ad7e4bfc14e	e34b34995e0f45e58c99616d7abe9ef8	0.94566
441b997bec002a7fe05e0ad7e4bfc14e	53af9abd745b84058c0d2ae0df538470	0.94566
6916d97494489296801671b8d18a0309	f97c644b06dc37cb599522bdbebb00ce	0.94566
6916d97494489296801671b8d18a0309	69916a1cde832bb15ac5acc0ef5e3518	0.94566
6916d97494489296801671b8d18a0309	19b0fb1765b3e69797548d682c6cc9e5	0.94566
eb63b799d3c4037796161ba48a0a1f56	1ee948b5ef1c4af93bce919fe1350f59	0.94566
eb63b799d3c4037796161ba48a0a1f56	0f6006dc9edddee73c4e03a918c3aa66	0.94566
eb63b799d3c4037796161ba48a0a1f56	b9c94fb812e22b97b7af9c94291f7c4b	0.94566
eb63b799d3c4037796161ba48a0a1f56	47ca7fea12ad5495291a9c082ccab40b	0.94566
eb63b799d3c4037796161ba48a0a1f56	1567b4dacafc28391f53de9efb63c5b9	0.94566
eb63b799d3c4037796161ba48a0a1f56	39e70d892a1b487e00ae81b7b70491af	0.94566
eb63b799d3c4037796161ba48a0a1f56	0342f30ab678cb75dc7d44eb6d1f3c71	0.94566
eb63b799d3c4037796161ba48a0a1f56	0b5e2d9f6e0cbf6d98e778a7111c4602	0.94566
422efbd87a37e2b1e7b7fa621cc99374	b9c94fb812e22b97b7af9c94291f7c4b	0.94566
422efbd87a37e2b1e7b7fa621cc99374	5f042513c67fdd55888051594cb486ac	0.94566
422efbd87a37e2b1e7b7fa621cc99374	6916815c0ac8c809f4feffb4f33fa465	0.94566
422efbd87a37e2b1e7b7fa621cc99374	6fd0abbdc549c1f98e8be4248bb8dcf6	0.94566
422efbd87a37e2b1e7b7fa621cc99374	878ac7527f7fdf86178eaa89ab6398fe	0.94566
422efbd87a37e2b1e7b7fa621cc99374	db15ab9a45047795ca19c70acb4bee26	0.94566
53f106106d2d64f757ac71843f1abfd4	15e3be12e07b72a573253f48a59b633d	0.94566
53f106106d2d64f757ac71843f1abfd4	5f6afde2820b99deca9453b9c66a70df	0.94566
da17572657f5636c66a5ce8c2d04922f	7eab0a327e61cde847742596712dcadb	0.94566
da17572657f5636c66a5ce8c2d04922f	6f2548da34731900e68ee1bbeed4a579	0.94566
da17572657f5636c66a5ce8c2d04922f	0e17c2c7eab35099465e8d4b48d8afd8	0.94566
da17572657f5636c66a5ce8c2d04922f	9b1e92389ef0cc5317353e8ea8426a70	0.94566
da17572657f5636c66a5ce8c2d04922f	8bd33e664b9a859086f52c1737c36339	0.94566
da17572657f5636c66a5ce8c2d04922f	ee1b83b83a5325710d6f1cf39d7f980f	0.94566
da17572657f5636c66a5ce8c2d04922f	7dee4c2d595b453d1565bfa40e967376	0.94566
da17572657f5636c66a5ce8c2d04922f	b42fc99cbb9150042fb31318bd88b12c	0.94566
da17572657f5636c66a5ce8c2d04922f	675f47f52ab28cdcf30e23836997082e	0.94566
da17572657f5636c66a5ce8c2d04922f	7a45e5e45d7fa0edc47f2289b8334a4e	0.94566
da17572657f5636c66a5ce8c2d04922f	6d17ed796a25ea35dc19e67c30960976	0.94566
b34fb0904caa8c1db6df0f5cb24da6b2	6dd57d68807306a85a30f15e758134d4	0.94566
b34fb0904caa8c1db6df0f5cb24da6b2	8ed57f2c85eafc0de2666de03e90eb14	0.94566
f77e657f16617d6eefe6c409ead568e8	0abe519a9a8a45aa86cceaf9f3c33f05	0.94566
f77e657f16617d6eefe6c409ead568e8	ccedbacba71f5225e8911acbd4552b5d	0.94566
f77e657f16617d6eefe6c409ead568e8	1b6b519d3d862ee5aa5f5fb031cbedd7	0.94566
7eab0a327e61cde847742596712dcadb	0e17c2c7eab35099465e8d4b48d8afd8	0.94566
7eab0a327e61cde847742596712dcadb	7dee4c2d595b453d1565bfa40e967376	0.94566
7eab0a327e61cde847742596712dcadb	b42fc99cbb9150042fb31318bd88b12c	0.94566
7eab0a327e61cde847742596712dcadb	6d17ed796a25ea35dc19e67c30960976	0.94566
6f2548da34731900e68ee1bbeed4a579	9b1e92389ef0cc5317353e8ea8426a70	0.94566
6f2548da34731900e68ee1bbeed4a579	cd98632699c5f92b428dd2337fc27563	0.94566
6f2548da34731900e68ee1bbeed4a579	675f47f52ab28cdcf30e23836997082e	0.94566
6f2548da34731900e68ee1bbeed4a579	7a45e5e45d7fa0edc47f2289b8334a4e	0.94566
6f2548da34731900e68ee1bbeed4a579	bfc979fbc3bc5a4801c52c99b2891336	0.94566
0e17c2c7eab35099465e8d4b48d8afd8	8bd33e664b9a859086f52c1737c36339	0.94566
0e17c2c7eab35099465e8d4b48d8afd8	ee1b83b83a5325710d6f1cf39d7f980f	0.94566
0e17c2c7eab35099465e8d4b48d8afd8	93c1449aef105c81ee44691574a04fa6	0.94566
0e17c2c7eab35099465e8d4b48d8afd8	7dee4c2d595b453d1565bfa40e967376	0.94566
0e17c2c7eab35099465e8d4b48d8afd8	b42fc99cbb9150042fb31318bd88b12c	0.94566
0e17c2c7eab35099465e8d4b48d8afd8	4cdf9aeb68a51fc2fff2f82e2e682c5b	0.94566
0e17c2c7eab35099465e8d4b48d8afd8	6d17ed796a25ea35dc19e67c30960976	0.94566
8a13f20e0e4548413b745bf51c9980b3	06c4da6859980f19124f84f1a07cf264	0.94566
8a13f20e0e4548413b745bf51c9980b3	7eef68355ee10d425106b785b6fea3c0	0.94566
8a13f20e0e4548413b745bf51c9980b3	34453ea17edd76b152c9eccce0400675	0.94566
8a13f20e0e4548413b745bf51c9980b3	34b68b1ef916cbbfcf7e587bb154452d	0.94566
8a13f20e0e4548413b745bf51c9980b3	519d9f87c7b9684dab0bac9e872e50bb	0.94566
8a13f20e0e4548413b745bf51c9980b3	df5a861dbf82d100812defe4b06ce542	0.94566
1ee948b5ef1c4af93bce919fe1350f59	0f6006dc9edddee73c4e03a918c3aa66	0.94566
1ee948b5ef1c4af93bce919fe1350f59	b9c94fb812e22b97b7af9c94291f7c4b	0.94566
1ee948b5ef1c4af93bce919fe1350f59	47ca7fea12ad5495291a9c082ccab40b	0.94566
1ee948b5ef1c4af93bce919fe1350f59	1567b4dacafc28391f53de9efb63c5b9	0.94566
1ee948b5ef1c4af93bce919fe1350f59	1659d7acb4a55ff27e3cbfc218639b9c	0.94566
1ee948b5ef1c4af93bce919fe1350f59	dd2c4829035030d079cc39155292c30e	0.94566
1ee948b5ef1c4af93bce919fe1350f59	39e70d892a1b487e00ae81b7b70491af	0.94566
1ee948b5ef1c4af93bce919fe1350f59	0342f30ab678cb75dc7d44eb6d1f3c71	0.94566
1ee948b5ef1c4af93bce919fe1350f59	e543abb5f12c23a50072118b9454f001	0.94566
c8583ffc493e6da2028670a01931b6a7	47591358addd7be611d87aa5fb1d0501	0.94566
0f6006dc9edddee73c4e03a918c3aa66	b9c94fb812e22b97b7af9c94291f7c4b	0.94566
0f6006dc9edddee73c4e03a918c3aa66	e131d6b9e4f997788460a450a69c3a99	0.94566
0f6006dc9edddee73c4e03a918c3aa66	64bcf94b568e9cbaa0404d841ad75435	0.94566
0f6006dc9edddee73c4e03a918c3aa66	fa493aa4f1faf6be9820d19f83cdd969	0.94566
0f6006dc9edddee73c4e03a918c3aa66	7aafbadd556b5626a3002e486eb63de0	0.94566
0f6006dc9edddee73c4e03a918c3aa66	0f407bb44ce651722dc620d0f9490b63	0.94566
0f6006dc9edddee73c4e03a918c3aa66	47ca7fea12ad5495291a9c082ccab40b	0.94566
0f6006dc9edddee73c4e03a918c3aa66	34b68b1ef916cbbfcf7e587bb154452d	0.94566
0f6006dc9edddee73c4e03a918c3aa66	f2816e09b5444945d9cb7c5c801d427d	0.94566
0f6006dc9edddee73c4e03a918c3aa66	0342f30ab678cb75dc7d44eb6d1f3c71	0.94566
0f6006dc9edddee73c4e03a918c3aa66	20dd251ae02aea592d801d239b63f9e4	0.94566
0f6006dc9edddee73c4e03a918c3aa66	0b5e2d9f6e0cbf6d98e778a7111c4602	0.94566
7e857ab7033d8eae6b29d820ef13ebb5	06c4da6859980f19124f84f1a07cf264	0.94566
f6608e71c06674d8840e9cb8ccb2e74d	82d44e32abc0cb731e83c993dc886c41	0.94566
f6608e71c06674d8840e9cb8ccb2e74d	741de23dfdfb60ee191b1bf3fb3e60e7	0.94566
f6608e71c06674d8840e9cb8ccb2e74d	6930c6e8b05fdc647188b4f611c6a705	0.94566
f6608e71c06674d8840e9cb8ccb2e74d	e543abb5f12c23a50072118b9454f001	0.94566
9b1e92389ef0cc5317353e8ea8426a70	675f47f52ab28cdcf30e23836997082e	0.94566
b991efbddcb23a9ce7cf362a9a85f7dd	bce23b9b289bb43bff25cd148f080557	0.94566
b991efbddcb23a9ce7cf362a9a85f7dd	b100c6f62ce1fa1c32a8d86bf1166780	0.94566
b991efbddcb23a9ce7cf362a9a85f7dd	4cdf9aeb68a51fc2fff2f82e2e682c5b	0.94566
0abe519a9a8a45aa86cceaf9f3c33f05	0315be37f6165f1e87335603ad7d63e9	0.94566
0abe519a9a8a45aa86cceaf9f3c33f05	4ec07abdb860bda723972447dfa55ddc	0.94566
0abe519a9a8a45aa86cceaf9f3c33f05	ccedbacba71f5225e8911acbd4552b5d	0.94566
0abe519a9a8a45aa86cceaf9f3c33f05	f2467b82d3b5cfa2b5d6973a1a855d78	0.94566
0abe519a9a8a45aa86cceaf9f3c33f05	1b6b519d3d862ee5aa5f5fb031cbedd7	0.94566
06c4da6859980f19124f84f1a07cf264	58b68525f7a335fdba75a3ce75720e07	0.94566
06c4da6859980f19124f84f1a07cf264	90a3648550c58dac0d8a380eeeb8cf17	0.94566
06c4da6859980f19124f84f1a07cf264	34b68b1ef916cbbfcf7e587bb154452d	0.94566
b9c94fb812e22b97b7af9c94291f7c4b	5f042513c67fdd55888051594cb486ac	0.94566
b9c94fb812e22b97b7af9c94291f7c4b	90a3648550c58dac0d8a380eeeb8cf17	0.94566
b9c94fb812e22b97b7af9c94291f7c4b	47ca7fea12ad5495291a9c082ccab40b	0.94566
b9c94fb812e22b97b7af9c94291f7c4b	1567b4dacafc28391f53de9efb63c5b9	0.94566
b9c94fb812e22b97b7af9c94291f7c4b	6fd0abbdc549c1f98e8be4248bb8dcf6	0.94566
b9c94fb812e22b97b7af9c94291f7c4b	39e70d892a1b487e00ae81b7b70491af	0.94566
b9c94fb812e22b97b7af9c94291f7c4b	0342f30ab678cb75dc7d44eb6d1f3c71	0.94566
b9c94fb812e22b97b7af9c94291f7c4b	878ac7527f7fdf86178eaa89ab6398fe	0.94566
b9c94fb812e22b97b7af9c94291f7c4b	db15ab9a45047795ca19c70acb4bee26	0.94566
b9c94fb812e22b97b7af9c94291f7c4b	0b5e2d9f6e0cbf6d98e778a7111c4602	0.94566
ac2662d36a91cba0d6b8fee15d75ead0	7dee4c2d595b453d1565bfa40e967376	0.94566
e131d6b9e4f997788460a450a69c3a99	fa493aa4f1faf6be9820d19f83cdd969	0.94566
e131d6b9e4f997788460a450a69c3a99	7aafbadd556b5626a3002e486eb63de0	0.94566
e131d6b9e4f997788460a450a69c3a99	0f407bb44ce651722dc620d0f9490b63	0.94566
e131d6b9e4f997788460a450a69c3a99	34b68b1ef916cbbfcf7e587bb154452d	0.94566
e131d6b9e4f997788460a450a69c3a99	b42fc99cbb9150042fb31318bd88b12c	0.94566
e131d6b9e4f997788460a450a69c3a99	96c5f928b96ff41ecf26e1e13259fa64	0.94566
e131d6b9e4f997788460a450a69c3a99	39e70d892a1b487e00ae81b7b70491af	0.94566
e131d6b9e4f997788460a450a69c3a99	f2816e09b5444945d9cb7c5c801d427d	0.94566
e131d6b9e4f997788460a450a69c3a99	20dd251ae02aea592d801d239b63f9e4	0.94566
7eef68355ee10d425106b785b6fea3c0	34453ea17edd76b152c9eccce0400675	0.94566
7eef68355ee10d425106b785b6fea3c0	519d9f87c7b9684dab0bac9e872e50bb	0.94566
7eef68355ee10d425106b785b6fea3c0	df5a861dbf82d100812defe4b06ce542	0.94566
7eef68355ee10d425106b785b6fea3c0	c4b50715602cceccd5ba14916e71bbbb	0.94566
f76d0ff8b2a18523b391183ec0615549	f7e7b8d4ffbc3a51d19581269876ac78	0.94566
f76d0ff8b2a18523b391183ec0615549	aa13b33f5e1937ef92b901d75f190fbe	0.94566
82d44e32abc0cb731e83c993dc886c41	741de23dfdfb60ee191b1bf3fb3e60e7	0.94566
82d44e32abc0cb731e83c993dc886c41	6930c6e8b05fdc647188b4f611c6a705	0.94566
82d44e32abc0cb731e83c993dc886c41	e543abb5f12c23a50072118b9454f001	0.94566
6dd57d68807306a85a30f15e758134d4	f6ecd0322cb47d8786f055d9bcd06354	0.94566
6dd57d68807306a85a30f15e758134d4	8ed57f2c85eafc0de2666de03e90eb14	0.94566
bce23b9b289bb43bff25cd148f080557	b100c6f62ce1fa1c32a8d86bf1166780	0.94566
bce23b9b289bb43bff25cd148f080557	4cdf9aeb68a51fc2fff2f82e2e682c5b	0.94566
58b68525f7a335fdba75a3ce75720e07	8e422b0b6170093273f54d40542df24c	0.94566
64bcf94b568e9cbaa0404d841ad75435	fa493aa4f1faf6be9820d19f83cdd969	0.94566
64bcf94b568e9cbaa0404d841ad75435	7aafbadd556b5626a3002e486eb63de0	0.94566
64bcf94b568e9cbaa0404d841ad75435	0f407bb44ce651722dc620d0f9490b63	0.94566
64bcf94b568e9cbaa0404d841ad75435	34b68b1ef916cbbfcf7e587bb154452d	0.94566
64bcf94b568e9cbaa0404d841ad75435	b42fc99cbb9150042fb31318bd88b12c	0.94566
64bcf94b568e9cbaa0404d841ad75435	96c5f928b96ff41ecf26e1e13259fa64	0.94566
64bcf94b568e9cbaa0404d841ad75435	39e70d892a1b487e00ae81b7b70491af	0.94566
64bcf94b568e9cbaa0404d841ad75435	f2816e09b5444945d9cb7c5c801d427d	0.94566
64bcf94b568e9cbaa0404d841ad75435	20dd251ae02aea592d801d239b63f9e4	0.94566
5f042513c67fdd55888051594cb486ac	6916815c0ac8c809f4feffb4f33fa465	0.94566
5f042513c67fdd55888051594cb486ac	90a3648550c58dac0d8a380eeeb8cf17	0.94566
5f042513c67fdd55888051594cb486ac	ad21821d85b6e1907c8a16adaa3c10ff	0.94566
5f042513c67fdd55888051594cb486ac	759ac655001806785218ecfb18b06a1d	0.94566
5f042513c67fdd55888051594cb486ac	6fd0abbdc549c1f98e8be4248bb8dcf6	0.94566
5f042513c67fdd55888051594cb486ac	b092f7f3425cc2dfc9965117ab63717d	0.94566
5f042513c67fdd55888051594cb486ac	a3ce2b76a5b2daccdcc5c58ee218896a	0.94566
5f042513c67fdd55888051594cb486ac	878ac7527f7fdf86178eaa89ab6398fe	0.94566
5f042513c67fdd55888051594cb486ac	db15ab9a45047795ca19c70acb4bee26	0.94566
5f042513c67fdd55888051594cb486ac	3a9208d106ad373e9d8528bbe6b9c5ad	0.94566
8bd33e664b9a859086f52c1737c36339	7dee4c2d595b453d1565bfa40e967376	0.94566
8bd33e664b9a859086f52c1737c36339	b42fc99cbb9150042fb31318bd88b12c	0.94566
8bd33e664b9a859086f52c1737c36339	8ed57f2c85eafc0de2666de03e90eb14	0.94566
8bd33e664b9a859086f52c1737c36339	6d17ed796a25ea35dc19e67c30960976	0.94566
741de23dfdfb60ee191b1bf3fb3e60e7	1567b4dacafc28391f53de9efb63c5b9	0.94566
741de23dfdfb60ee191b1bf3fb3e60e7	e6bf388f645d191d15b3b52d2c55325e	0.94566
741de23dfdfb60ee191b1bf3fb3e60e7	6930c6e8b05fdc647188b4f611c6a705	0.94566
34453ea17edd76b152c9eccce0400675	519d9f87c7b9684dab0bac9e872e50bb	0.94566
34453ea17edd76b152c9eccce0400675	df5a861dbf82d100812defe4b06ce542	0.94566
34453ea17edd76b152c9eccce0400675	c4b50715602cceccd5ba14916e71bbbb	0.94566
fa493aa4f1faf6be9820d19f83cdd969	7aafbadd556b5626a3002e486eb63de0	0.94566
fa493aa4f1faf6be9820d19f83cdd969	34b68b1ef916cbbfcf7e587bb154452d	0.94566
fa493aa4f1faf6be9820d19f83cdd969	b42fc99cbb9150042fb31318bd88b12c	0.94566
fa493aa4f1faf6be9820d19f83cdd969	96c5f928b96ff41ecf26e1e13259fa64	0.94566
fa493aa4f1faf6be9820d19f83cdd969	39e70d892a1b487e00ae81b7b70491af	0.94566
fa493aa4f1faf6be9820d19f83cdd969	f2816e09b5444945d9cb7c5c801d427d	0.94566
fa493aa4f1faf6be9820d19f83cdd969	878ac7527f7fdf86178eaa89ab6398fe	0.94566
fa493aa4f1faf6be9820d19f83cdd969	20dd251ae02aea592d801d239b63f9e4	0.94566
6916815c0ac8c809f4feffb4f33fa465	90a3648550c58dac0d8a380eeeb8cf17	0.94566
6916815c0ac8c809f4feffb4f33fa465	6fd0abbdc549c1f98e8be4248bb8dcf6	0.94566
6916815c0ac8c809f4feffb4f33fa465	878ac7527f7fdf86178eaa89ab6398fe	0.94566
6916815c0ac8c809f4feffb4f33fa465	db15ab9a45047795ca19c70acb4bee26	0.94566
6916815c0ac8c809f4feffb4f33fa465	20dd251ae02aea592d801d239b63f9e4	0.94566
6916815c0ac8c809f4feffb4f33fa465	70c3da9a368397a37246d8dcdf38f4cb	0.94566
6916815c0ac8c809f4feffb4f33fa465	d9ba875ec594e62c868f973b4a4d7a05	0.94566
90a3648550c58dac0d8a380eeeb8cf17	34b68b1ef916cbbfcf7e587bb154452d	0.94566
90a3648550c58dac0d8a380eeeb8cf17	878ac7527f7fdf86178eaa89ab6398fe	0.94566
90a3648550c58dac0d8a380eeeb8cf17	db15ab9a45047795ca19c70acb4bee26	0.94566
0315be37f6165f1e87335603ad7d63e9	4ec07abdb860bda723972447dfa55ddc	0.94566
0315be37f6165f1e87335603ad7d63e9	ccedbacba71f5225e8911acbd4552b5d	0.94566
0315be37f6165f1e87335603ad7d63e9	1b6b519d3d862ee5aa5f5fb031cbedd7	0.94566
7aafbadd556b5626a3002e486eb63de0	0f407bb44ce651722dc620d0f9490b63	0.94566
7aafbadd556b5626a3002e486eb63de0	34b68b1ef916cbbfcf7e587bb154452d	0.94566
7aafbadd556b5626a3002e486eb63de0	b42fc99cbb9150042fb31318bd88b12c	0.94566
7aafbadd556b5626a3002e486eb63de0	96c5f928b96ff41ecf26e1e13259fa64	0.94566
7aafbadd556b5626a3002e486eb63de0	39e70d892a1b487e00ae81b7b70491af	0.94566
7aafbadd556b5626a3002e486eb63de0	f2816e09b5444945d9cb7c5c801d427d	0.94566
7aafbadd556b5626a3002e486eb63de0	4cc87bf12585f95f9a1de927168e045a	0.94566
f97c644b06dc37cb599522bdbebb00ce	9e8523807c59f3603834a25cbcd86494	0.94566
ad21821d85b6e1907c8a16adaa3c10ff	759ac655001806785218ecfb18b06a1d	0.94566
ad21821d85b6e1907c8a16adaa3c10ff	b092f7f3425cc2dfc9965117ab63717d	0.94566
ad21821d85b6e1907c8a16adaa3c10ff	a3ce2b76a5b2daccdcc5c58ee218896a	0.94566
ad21821d85b6e1907c8a16adaa3c10ff	db15ab9a45047795ca19c70acb4bee26	0.94566
ad21821d85b6e1907c8a16adaa3c10ff	3a9208d106ad373e9d8528bbe6b9c5ad	0.94566
b100c6f62ce1fa1c32a8d86bf1166780	4cdf9aeb68a51fc2fff2f82e2e682c5b	0.94566
0f407bb44ce651722dc620d0f9490b63	34b68b1ef916cbbfcf7e587bb154452d	0.94566
0f407bb44ce651722dc620d0f9490b63	b42fc99cbb9150042fb31318bd88b12c	0.94566
0f407bb44ce651722dc620d0f9490b63	96c5f928b96ff41ecf26e1e13259fa64	0.94566
0f407bb44ce651722dc620d0f9490b63	39e70d892a1b487e00ae81b7b70491af	0.94566
0f407bb44ce651722dc620d0f9490b63	f2816e09b5444945d9cb7c5c801d427d	0.94566
0f407bb44ce651722dc620d0f9490b63	20dd251ae02aea592d801d239b63f9e4	0.94566
ee1b83b83a5325710d6f1cf39d7f980f	7dee4c2d595b453d1565bfa40e967376	0.94566
ee1b83b83a5325710d6f1cf39d7f980f	b42fc99cbb9150042fb31318bd88b12c	0.94566
ee1b83b83a5325710d6f1cf39d7f980f	6d17ed796a25ea35dc19e67c30960976	0.94566
759ac655001806785218ecfb18b06a1d	1567b4dacafc28391f53de9efb63c5b9	0.94566
759ac655001806785218ecfb18b06a1d	e6bf388f645d191d15b3b52d2c55325e	0.94566
759ac655001806785218ecfb18b06a1d	a3ce2b76a5b2daccdcc5c58ee218896a	0.94566
759ac655001806785218ecfb18b06a1d	db15ab9a45047795ca19c70acb4bee26	0.94566
759ac655001806785218ecfb18b06a1d	3a9208d106ad373e9d8528bbe6b9c5ad	0.94566
eb56533502639959923e46d4d4ce2d36	b70898de946a803c963584e6b7b27bea	0.94566
eb56533502639959923e46d4d4ce2d36	df976bbb8cae9501a9b0033a2df0750f	0.94566
eb56533502639959923e46d4d4ce2d36	f5894077625c801e89b4365be5964095	0.94566
b70898de946a803c963584e6b7b27bea	df976bbb8cae9501a9b0033a2df0750f	0.94566
b70898de946a803c963584e6b7b27bea	f5894077625c801e89b4365be5964095	0.94566
8c68c8f1ca3ceb58bd95ff2e2f7444af	6930c6e8b05fdc647188b4f611c6a705	0.94566
47ca7fea12ad5495291a9c082ccab40b	1567b4dacafc28391f53de9efb63c5b9	0.94566
47ca7fea12ad5495291a9c082ccab40b	39e70d892a1b487e00ae81b7b70491af	0.94566
47ca7fea12ad5495291a9c082ccab40b	0342f30ab678cb75dc7d44eb6d1f3c71	0.94566
47ca7fea12ad5495291a9c082ccab40b	0b5e2d9f6e0cbf6d98e778a7111c4602	0.94566
cd98632699c5f92b428dd2337fc27563	675f47f52ab28cdcf30e23836997082e	0.94566
df976bbb8cae9501a9b0033a2df0750f	f5894077625c801e89b4365be5964095	0.94566
15e3be12e07b72a573253f48a59b633d	5f6afde2820b99deca9453b9c66a70df	0.94566
1567b4dacafc28391f53de9efb63c5b9	e6bf388f645d191d15b3b52d2c55325e	0.94566
1567b4dacafc28391f53de9efb63c5b9	b092f7f3425cc2dfc9965117ab63717d	0.94566
1567b4dacafc28391f53de9efb63c5b9	0342f30ab678cb75dc7d44eb6d1f3c71	0.94566
1567b4dacafc28391f53de9efb63c5b9	0b5e2d9f6e0cbf6d98e778a7111c4602	0.94566
7dee4c2d595b453d1565bfa40e967376	b42fc99cbb9150042fb31318bd88b12c	0.94566
7dee4c2d595b453d1565bfa40e967376	6d17ed796a25ea35dc19e67c30960976	0.94566
34b68b1ef916cbbfcf7e587bb154452d	b42fc99cbb9150042fb31318bd88b12c	0.94566
34b68b1ef916cbbfcf7e587bb154452d	96c5f928b96ff41ecf26e1e13259fa64	0.94566
34b68b1ef916cbbfcf7e587bb154452d	39e70d892a1b487e00ae81b7b70491af	0.94566
34b68b1ef916cbbfcf7e587bb154452d	20dd251ae02aea592d801d239b63f9e4	0.94566
b42fc99cbb9150042fb31318bd88b12c	f2816e09b5444945d9cb7c5c801d427d	0.94566
b42fc99cbb9150042fb31318bd88b12c	6d17ed796a25ea35dc19e67c30960976	0.94566
b42fc99cbb9150042fb31318bd88b12c	20dd251ae02aea592d801d239b63f9e4	0.94566
6fd0abbdc549c1f98e8be4248bb8dcf6	878ac7527f7fdf86178eaa89ab6398fe	0.94566
6fd0abbdc549c1f98e8be4248bb8dcf6	db15ab9a45047795ca19c70acb4bee26	0.94566
e6bf388f645d191d15b3b52d2c55325e	b092f7f3425cc2dfc9965117ab63717d	0.94566
f7e7b8d4ffbc3a51d19581269876ac78	aa13b33f5e1937ef92b901d75f190fbe	0.94566
b092f7f3425cc2dfc9965117ab63717d	a3ce2b76a5b2daccdcc5c58ee218896a	0.94566
b092f7f3425cc2dfc9965117ab63717d	db15ab9a45047795ca19c70acb4bee26	0.94566
b092f7f3425cc2dfc9965117ab63717d	3a9208d106ad373e9d8528bbe6b9c5ad	0.94566
96c5f928b96ff41ecf26e1e13259fa64	f2816e09b5444945d9cb7c5c801d427d	0.94566
96c5f928b96ff41ecf26e1e13259fa64	20dd251ae02aea592d801d239b63f9e4	0.94566
f5894077625c801e89b4365be5964095	79b7674106bc3fb9eccf73c5bd64bfb5	0.94566
f5894077625c801e89b4365be5964095	7a45e5e45d7fa0edc47f2289b8334a4e	0.94566
f5894077625c801e89b4365be5964095	56f9c987896664bf30b7df45f17c2c30	0.94566
4ec07abdb860bda723972447dfa55ddc	ccedbacba71f5225e8911acbd4552b5d	0.94566
4ec07abdb860bda723972447dfa55ddc	f2467b82d3b5cfa2b5d6973a1a855d78	0.94566
4ec07abdb860bda723972447dfa55ddc	1b6b519d3d862ee5aa5f5fb031cbedd7	0.94566
e8caf16f88368cc1ca62882084555291	69916a1cde832bb15ac5acc0ef5e3518	0.94566
e8caf16f88368cc1ca62882084555291	0467b796cedda0e417b7e95a797eb8fd	0.94566
e8caf16f88368cc1ca62882084555291	fbba10bc26152630ec70583c4fb41d7d	0.94566
79b7674106bc3fb9eccf73c5bd64bfb5	7a45e5e45d7fa0edc47f2289b8334a4e	0.94566
79b7674106bc3fb9eccf73c5bd64bfb5	56f9c987896664bf30b7df45f17c2c30	0.94566
a3ce2b76a5b2daccdcc5c58ee218896a	16d19beed9098b492bb799ec5c0441d7	0.94566
a3ce2b76a5b2daccdcc5c58ee218896a	db15ab9a45047795ca19c70acb4bee26	0.94566
a3ce2b76a5b2daccdcc5c58ee218896a	3a9208d106ad373e9d8528bbe6b9c5ad	0.94566
e34b34995e0f45e58c99616d7abe9ef8	53af9abd745b84058c0d2ae0df538470	0.94566
1659d7acb4a55ff27e3cbfc218639b9c	dd2c4829035030d079cc39155292c30e	0.94566
1659d7acb4a55ff27e3cbfc218639b9c	e543abb5f12c23a50072118b9454f001	0.94566
1659d7acb4a55ff27e3cbfc218639b9c	3a9208d106ad373e9d8528bbe6b9c5ad	0.94566
ccedbacba71f5225e8911acbd4552b5d	f2467b82d3b5cfa2b5d6973a1a855d78	0.94566
ccedbacba71f5225e8911acbd4552b5d	1b6b519d3d862ee5aa5f5fb031cbedd7	0.94566
69916a1cde832bb15ac5acc0ef5e3518	0467b796cedda0e417b7e95a797eb8fd	0.94566
519d9f87c7b9684dab0bac9e872e50bb	df5a861dbf82d100812defe4b06ce542	0.94566
519d9f87c7b9684dab0bac9e872e50bb	c4b50715602cceccd5ba14916e71bbbb	0.94566
16d19beed9098b492bb799ec5c0441d7	db15ab9a45047795ca19c70acb4bee26	0.94566
7a45e5e45d7fa0edc47f2289b8334a4e	56f9c987896664bf30b7df45f17c2c30	0.94566
df5a861dbf82d100812defe4b06ce542	c4b50715602cceccd5ba14916e71bbbb	0.94566
3f1304fc1b0de80cad541bdcff9676a5	20dd251ae02aea592d801d239b63f9e4	0.94566
3f1304fc1b0de80cad541bdcff9676a5	70c3da9a368397a37246d8dcdf38f4cb	0.94566
3f1304fc1b0de80cad541bdcff9676a5	d9ba875ec594e62c868f973b4a4d7a05	0.94566
3f1304fc1b0de80cad541bdcff9676a5	0b5e2d9f6e0cbf6d98e778a7111c4602	0.94566
5f6afde2820b99deca9453b9c66a70df	0467b796cedda0e417b7e95a797eb8fd	0.94566
5f6afde2820b99deca9453b9c66a70df	70c3da9a368397a37246d8dcdf38f4cb	0.94566
6930c6e8b05fdc647188b4f611c6a705	e543abb5f12c23a50072118b9454f001	0.94566
dd2c4829035030d079cc39155292c30e	e543abb5f12c23a50072118b9454f001	0.94566
dd2c4829035030d079cc39155292c30e	3a9208d106ad373e9d8528bbe6b9c5ad	0.94566
dd2c4829035030d079cc39155292c30e	26e3172c82dba111de5112291a32e042	0.94566
39e70d892a1b487e00ae81b7b70491af	f2816e09b5444945d9cb7c5c801d427d	0.94566
39e70d892a1b487e00ae81b7b70491af	0342f30ab678cb75dc7d44eb6d1f3c71	0.94566
39e70d892a1b487e00ae81b7b70491af	20dd251ae02aea592d801d239b63f9e4	0.94566
f2816e09b5444945d9cb7c5c801d427d	20dd251ae02aea592d801d239b63f9e4	0.94566
0342f30ab678cb75dc7d44eb6d1f3c71	0b5e2d9f6e0cbf6d98e778a7111c4602	0.94566
878ac7527f7fdf86178eaa89ab6398fe	db15ab9a45047795ca19c70acb4bee26	0.94566
db15ab9a45047795ca19c70acb4bee26	3a9208d106ad373e9d8528bbe6b9c5ad	0.94566
f2467b82d3b5cfa2b5d6973a1a855d78	1b6b519d3d862ee5aa5f5fb031cbedd7	0.94566
0467b796cedda0e417b7e95a797eb8fd	70c3da9a368397a37246d8dcdf38f4cb	0.94566
20dd251ae02aea592d801d239b63f9e4	70c3da9a368397a37246d8dcdf38f4cb	0.94566
20dd251ae02aea592d801d239b63f9e4	d9ba875ec594e62c868f973b4a4d7a05	0.94566
70c3da9a368397a37246d8dcdf38f4cb	d9ba875ec594e62c868f973b4a4d7a05	0.94566
Kbrevis	eb32459bd42821aedd3001b8cfbb676e	0.84535
Kbrevis	5becdcb4c3c8cfac25525c0b7e4ff555	0.84535
Kbrevis	eda6f9881bff8aea35a15d26cc534efd	0.84535
Kbrevis	2e7dc21a0f95dd7b7d840d410c07483d	0.84535
Kbrevis	82d44e32abc0cb731e83c993dc886c41	0.84535
Kbrevis	15e3be12e07b72a573253f48a59b633d	0.84535
Kbrevis	4cdf9aeb68a51fc2fff2f82e2e682c5b	0.84535
Kbrevis	16d19beed9098b492bb799ec5c0441d7	0.84535
Kbrevis	db15ab9a45047795ca19c70acb4bee26	0.84535

## Sheet: S6-MINE-3
Table S6: All pairs of taxa (Karenia brevis and all microbial SVs) in the intermediate size fraction with significant co-variation and the associated Maximal Information Coefficient value.
Source	Target	MICe
Kbrevis	c4b95a9b5ca76755b59ccd86ae6deba0	0.99403
Kbrevis	bf4864246283a3df9d2d93cd25ea6c74	0.99403
Kbrevis	bf486bb1d9da587f9f41912eee4b2e77	0.99403
Kbrevis	8f9f1aae9646df33f47a6cf3fe8e9739	0.99403
Kbrevis	f1bb935fa8a308892ff011e7813dfc5c	0.99403
Kbrevis	092eca9cd442d861a0923e8ff485bfe1	0.99403
Kbrevis	6f2548da34731900e68ee1bbeed4a579	0.99403
Kbrevis	c22273f574a6358a8544884020f7a822	0.99403
Kbrevis	0915263f5f4c5ca4e656773ecaeddd7a	0.99403
Kbrevis	c1b64e9ee44cded7174eb92430f7ac95	0.99403
Kbrevis	679dbf70f65f5ada0f1716630019651d	0.99403
Kbrevis	d9db432ac0d299dffcadd359c0e7120b	0.99403
Kbrevis	cd98632699c5f92b428dd2337fc27563	0.99403
Kbrevis	4ec07abdb860bda723972447dfa55ddc	0.99403
Kbrevis	675f47f52ab28cdcf30e23836997082e	0.99403
Kbrevis	9fc85a26ba4e62372a0510e76a6e616b	0.99403
Kbrevis	55ba03929d537e43f91aa98c36421f34	0.99403
56dfd9d7e24de5f67e68506768209dca	33ec2672acc39980a0e805c26d08cb79	0.99403
56dfd9d7e24de5f67e68506768209dca	99847a0aad4c578374c41bae937991b6	0.99403
56dfd9d7e24de5f67e68506768209dca	7233e4cdaface6927d43773c964f94e4	0.99403
56dfd9d7e24de5f67e68506768209dca	f6608e71c06674d8840e9cb8ccb2e74d	0.99403
56dfd9d7e24de5f67e68506768209dca	f2816e09b5444945d9cb7c5c801d427d	0.99403
56dfd9d7e24de5f67e68506768209dca	e543abb5f12c23a50072118b9454f001	0.99403
8b17dc24e50d2dc95225eab2c1a87f23	60d593dcc8007742d4962bd8ab803953	0.99403
8b17dc24e50d2dc95225eab2c1a87f23	5becdcb4c3c8cfac25525c0b7e4ff555	0.99403
8b17dc24e50d2dc95225eab2c1a87f23	63bf8d81940fc455b5cc541cc7a660bb	0.99403
8b17dc24e50d2dc95225eab2c1a87f23	70c3da9a368397a37246d8dcdf38f4cb	0.99403
a3a39c55a5ca46d938e682cd55dabcf0	bf4864246283a3df9d2d93cd25ea6c74	0.99403
a3a39c55a5ca46d938e682cd55dabcf0	1040ffc55a036894e9ec2cbe47802e07	0.99403
a3a39c55a5ca46d938e682cd55dabcf0	8645ac02dc586fcd4a083b94279834f7	0.99403
a3a39c55a5ca46d938e682cd55dabcf0	fcb732848a3d018dde12adafdf5fa5f9	0.99403
a3a39c55a5ca46d938e682cd55dabcf0	522f072a3e8ca88b8f8bdecea04465d9	0.99403
e209928576629d90c305bcb9bcde90af	74671b83e5c4600d0b1955b4c17ffb5c	0.99403
ca0ef16ea772060cc0bcc54428f9c1d3	eb7ad7504f3a8f3dfa3361a19fc14984	0.99403
827e158b58edb9143492782dd442a065	9c94712b0ac128883aeed3cf0cd696c7	0.99403
827e158b58edb9143492782dd442a065	64bcf94b568e9cbaa0404d841ad75435	0.99403
827e158b58edb9143492782dd442a065	696fcd39d96eaa84510ddbb3e00d8263	0.99403
827e158b58edb9143492782dd442a065	aa13b33f5e1937ef92b901d75f190fbe	0.99403
0d5e635df614a9c9a7b42ca3500c0d3c	fed75833daf5ab33e23b2bf6f6ce1d33	0.99403
0d5e635df614a9c9a7b42ca3500c0d3c	1c926ca8fd259c89ece07dfe79c62dfa	0.99403
0d5e635df614a9c9a7b42ca3500c0d3c	5e6553c89aa09df554730e0e0dcddff2	0.99403
0d5e635df614a9c9a7b42ca3500c0d3c	5511d7e46c7812c750470a3d28c32f4d	0.99403
0d5e635df614a9c9a7b42ca3500c0d3c	10ca86dccfe1472117a0599a1f4f1635	0.99403
0d5e635df614a9c9a7b42ca3500c0d3c	0f6006dc9edddee73c4e03a918c3aa66	0.99403
0d5e635df614a9c9a7b42ca3500c0d3c	fa493aa4f1faf6be9820d19f83cdd969	0.99403
0d5e635df614a9c9a7b42ca3500c0d3c	759ac655001806785218ecfb18b06a1d	0.99403
0d5e635df614a9c9a7b42ca3500c0d3c	b42fc99cbb9150042fb31318bd88b12c	0.99403
0d5e635df614a9c9a7b42ca3500c0d3c	96c5f928b96ff41ecf26e1e13259fa64	0.99403
0d5e635df614a9c9a7b42ca3500c0d3c	a018dfb928f901a2fbc3ee62c0e7362b	0.99403
0d5e635df614a9c9a7b42ca3500c0d3c	2652f19ead90e82ed89bbfd4143f6b0c	0.99403
36c542375a8bbe47f1ac5c1dc0d0fed3	82ab1c4ae0247432ba9b9493cfbc6b14	0.99403
36c542375a8bbe47f1ac5c1dc0d0fed3	c4b95a9b5ca76755b59ccd86ae6deba0	0.99403
36c542375a8bbe47f1ac5c1dc0d0fed3	69a038a32cdce0e9c59aa15868003dc0	0.99403
36c542375a8bbe47f1ac5c1dc0d0fed3	8e5281a27251d237ae4b293a88ea1fca	0.99403
36c542375a8bbe47f1ac5c1dc0d0fed3	493972dbac72c6de5d9e0713cb321192	0.99403
36c542375a8bbe47f1ac5c1dc0d0fed3	8f9f1aae9646df33f47a6cf3fe8e9739	0.99403
36c542375a8bbe47f1ac5c1dc0d0fed3	f3ec851b710817bb01a81540c8a17a53	0.99403
36c542375a8bbe47f1ac5c1dc0d0fed3	2c914ca6839f67afcfecf21668190d7e	0.99403
36c542375a8bbe47f1ac5c1dc0d0fed3	c0086f50c449526558dcbb7fd569043f	0.99403
36c542375a8bbe47f1ac5c1dc0d0fed3	b34fb0904caa8c1db6df0f5cb24da6b2	0.99403
36c542375a8bbe47f1ac5c1dc0d0fed3	47591358addd7be611d87aa5fb1d0501	0.99403
36c542375a8bbe47f1ac5c1dc0d0fed3	c1b64e9ee44cded7174eb92430f7ac95	0.99403
36c542375a8bbe47f1ac5c1dc0d0fed3	d9db432ac0d299dffcadd359c0e7120b	0.99403
36c542375a8bbe47f1ac5c1dc0d0fed3	a446207351cbb3a918183507652fbb97	0.99403
36c542375a8bbe47f1ac5c1dc0d0fed3	4cdf9aeb68a51fc2fff2f82e2e682c5b	0.99403
36c542375a8bbe47f1ac5c1dc0d0fed3	4975e9498ed5c0822a2f200287a6c612	0.99403
36c542375a8bbe47f1ac5c1dc0d0fed3	55ba03929d537e43f91aa98c36421f34	0.99403
b9d507fdd120f6930cb77be2a8f6b68d	e6f36661db6fbcff3ccc39aa0a823810	0.99403
b9d507fdd120f6930cb77be2a8f6b68d	94e10c92d744617d9880b78eef11a2c6	0.99403
b9d507fdd120f6930cb77be2a8f6b68d	4edec3e2a4504a62bdc1387a9f7bcc26	0.99403
b9d507fdd120f6930cb77be2a8f6b68d	7ee887337d29a3cd41f4648bbd1ef6ba	0.99403
2b35508b4e319298a088c9a20f5cf1b1	eb7ad7504f3a8f3dfa3361a19fc14984	0.99403
2b35508b4e319298a088c9a20f5cf1b1	1438af8d3f304470c4aee3d93544521e	0.99403
ee127d2b4880fc0a1f416d3c6907bfea	5610f9fd4d05131f3274383ca5be7ed2	0.99403
ee127d2b4880fc0a1f416d3c6907bfea	7c762c36ae20866e1998a696f50f9716	0.99403
ee127d2b4880fc0a1f416d3c6907bfea	0915263f5f4c5ca4e656773ecaeddd7a	0.99403
ee127d2b4880fc0a1f416d3c6907bfea	0315be37f6165f1e87335603ad7d63e9	0.99403
a34cbe9b30498b9c31eb71cea0584b56	416c2d057afa011278e4072aa985db0a	0.99403
a34cbe9b30498b9c31eb71cea0584b56	b06d1f86a1336811966c0e55dafe5152	0.99403
a90e3b691738b7aa64868ab8d00bea6d	bf486bb1d9da587f9f41912eee4b2e77	0.99403
a90e3b691738b7aa64868ab8d00bea6d	d9b7d98120e626b2f0f10e3febe8682c	0.99403
a90e3b691738b7aa64868ab8d00bea6d	22f26cc2c7277df74d59aa1f5adb05e4	0.99403
a90e3b691738b7aa64868ab8d00bea6d	e39b0a8cf183344fae62c2e14a46a910	0.99403
a90e3b691738b7aa64868ab8d00bea6d	c22273f574a6358a8544884020f7a822	0.99403
a90e3b691738b7aa64868ab8d00bea6d	59702671fe9c6d0fafd8225d1f68bd1f	0.99403
a90e3b691738b7aa64868ab8d00bea6d	cd98632699c5f92b428dd2337fc27563	0.99403
a90e3b691738b7aa64868ab8d00bea6d	ccedbacba71f5225e8911acbd4552b5d	0.99403
932c94ef9ab7cd5dbb25803383b81a78	33ec2672acc39980a0e805c26d08cb79	0.99403
932c94ef9ab7cd5dbb25803383b81a78	4e7254e7faee92f9868759c556ed73ae	0.99403
932c94ef9ab7cd5dbb25803383b81a78	fcaeef384902686a3bb1a45b9fd73d3c	0.99403
932c94ef9ab7cd5dbb25803383b81a78	0467b796cedda0e417b7e95a797eb8fd	0.99403
d127f00c91d8278183df0c94544bd583	a1a830867e5263c7c5a346034d0665dd	0.99403
d127f00c91d8278183df0c94544bd583	ce851835782c77fa754b92d567741d8d	0.99403
d127f00c91d8278183df0c94544bd583	d56d487973829be6bedf092e2fc3b90e	0.99403
d127f00c91d8278183df0c94544bd583	e131d6b9e4f997788460a450a69c3a99	0.99403
d127f00c91d8278183df0c94544bd583	58b68525f7a335fdba75a3ce75720e07	0.99403
d127f00c91d8278183df0c94544bd583	49c1ac3db0834e9040ad888443339e6f	0.99403
f322ca331475f9f8e883a0bc356b5c64	c5110bc820a22854866d6b5ee21344c2	0.99403
f322ca331475f9f8e883a0bc356b5c64	60c0b3ef3f120e37a029f9f74dd4fe22	0.99403
f322ca331475f9f8e883a0bc356b5c64	7fc0ccbd86b09190f44369a934b3456c	0.99403
f322ca331475f9f8e883a0bc356b5c64	da17572657f5636c66a5ce8c2d04922f	0.99403
82ab1c4ae0247432ba9b9493cfbc6b14	c4b95a9b5ca76755b59ccd86ae6deba0	0.99403
82ab1c4ae0247432ba9b9493cfbc6b14	69a038a32cdce0e9c59aa15868003dc0	0.99403
82ab1c4ae0247432ba9b9493cfbc6b14	8f9f1aae9646df33f47a6cf3fe8e9739	0.99403
82ab1c4ae0247432ba9b9493cfbc6b14	2c914ca6839f67afcfecf21668190d7e	0.99403
82ab1c4ae0247432ba9b9493cfbc6b14	c0086f50c449526558dcbb7fd569043f	0.99403
82ab1c4ae0247432ba9b9493cfbc6b14	b34fb0904caa8c1db6df0f5cb24da6b2	0.99403
82ab1c4ae0247432ba9b9493cfbc6b14	47591358addd7be611d87aa5fb1d0501	0.99403
82ab1c4ae0247432ba9b9493cfbc6b14	c1b64e9ee44cded7174eb92430f7ac95	0.99403
82ab1c4ae0247432ba9b9493cfbc6b14	22a7879edff5dac58a2323ea2f5f00cf	0.99403
82ab1c4ae0247432ba9b9493cfbc6b14	d9db432ac0d299dffcadd359c0e7120b	0.99403
82ab1c4ae0247432ba9b9493cfbc6b14	a446207351cbb3a918183507652fbb97	0.99403
82ab1c4ae0247432ba9b9493cfbc6b14	4cdf9aeb68a51fc2fff2f82e2e682c5b	0.99403
82ab1c4ae0247432ba9b9493cfbc6b14	4975e9498ed5c0822a2f200287a6c612	0.99403
82ab1c4ae0247432ba9b9493cfbc6b14	55ba03929d537e43f91aa98c36421f34	0.99403
fed75833daf5ab33e23b2bf6f6ce1d33	10ca86dccfe1472117a0599a1f4f1635	0.99403
70d97de680664e76b509834800991031	d2ab948d10088c5dc2d6ebc1858bc08a	0.99403
70d97de680664e76b509834800991031	d6165e0582a03dd12b473c294cdd3bcd	0.99403
70d97de680664e76b509834800991031	d8783ee923cd85c2a36a867210303e03	0.99403
a1a830867e5263c7c5a346034d0665dd	ce851835782c77fa754b92d567741d8d	0.99403
a1a830867e5263c7c5a346034d0665dd	d56d487973829be6bedf092e2fc3b90e	0.99403
a1a830867e5263c7c5a346034d0665dd	e131d6b9e4f997788460a450a69c3a99	0.99403
a1a830867e5263c7c5a346034d0665dd	58b68525f7a335fdba75a3ce75720e07	0.99403
a1a830867e5263c7c5a346034d0665dd	49c1ac3db0834e9040ad888443339e6f	0.99403
6aa1d95a0d4764b83e0925b3122274ed	bee6c2d572a23973ad932f48649b4e8c	0.99403
6aa1d95a0d4764b83e0925b3122274ed	1c926ca8fd259c89ece07dfe79c62dfa	0.99403
6aa1d95a0d4764b83e0925b3122274ed	1ee948b5ef1c4af93bce919fe1350f59	0.99403
6aa1d95a0d4764b83e0925b3122274ed	741de23dfdfb60ee191b1bf3fb3e60e7	0.99403
6aa1d95a0d4764b83e0925b3122274ed	a018dfb928f901a2fbc3ee62c0e7362b	0.99403
c4b95a9b5ca76755b59ccd86ae6deba0	69a038a32cdce0e9c59aa15868003dc0	0.99403
c4b95a9b5ca76755b59ccd86ae6deba0	8f9f1aae9646df33f47a6cf3fe8e9739	0.99403
c4b95a9b5ca76755b59ccd86ae6deba0	f1bb935fa8a308892ff011e7813dfc5c	0.99403
c4b95a9b5ca76755b59ccd86ae6deba0	2c914ca6839f67afcfecf21668190d7e	0.99403
c4b95a9b5ca76755b59ccd86ae6deba0	c0086f50c449526558dcbb7fd569043f	0.99403
c4b95a9b5ca76755b59ccd86ae6deba0	092eca9cd442d861a0923e8ff485bfe1	0.99403
c4b95a9b5ca76755b59ccd86ae6deba0	b34fb0904caa8c1db6df0f5cb24da6b2	0.99403
c4b95a9b5ca76755b59ccd86ae6deba0	47591358addd7be611d87aa5fb1d0501	0.99403
c4b95a9b5ca76755b59ccd86ae6deba0	c1b64e9ee44cded7174eb92430f7ac95	0.99403
c4b95a9b5ca76755b59ccd86ae6deba0	679dbf70f65f5ada0f1716630019651d	0.99403
c4b95a9b5ca76755b59ccd86ae6deba0	d9db432ac0d299dffcadd359c0e7120b	0.99403
c4b95a9b5ca76755b59ccd86ae6deba0	a446207351cbb3a918183507652fbb97	0.99403
c4b95a9b5ca76755b59ccd86ae6deba0	4cdf9aeb68a51fc2fff2f82e2e682c5b	0.99403
c4b95a9b5ca76755b59ccd86ae6deba0	4975e9498ed5c0822a2f200287a6c612	0.99403
c4b95a9b5ca76755b59ccd86ae6deba0	55ba03929d537e43f91aa98c36421f34	0.99403
cb580583ea3fdb75c58a573e23f3b42e	67f59db4c23e06a8484ab88a3e520323	0.99403
cb580583ea3fdb75c58a573e23f3b42e	14525301bb4271314d10e75fe308a602	0.99403
aafcb8286072f743504c5ffde9d97035	f7e7b8d4ffbc3a51d19581269876ac78	0.99403
ce851835782c77fa754b92d567741d8d	d56d487973829be6bedf092e2fc3b90e	0.99403
ce851835782c77fa754b92d567741d8d	e131d6b9e4f997788460a450a69c3a99	0.99403
ce851835782c77fa754b92d567741d8d	58b68525f7a335fdba75a3ce75720e07	0.99403
ce851835782c77fa754b92d567741d8d	49c1ac3db0834e9040ad888443339e6f	0.99403
9ff870beffc06840cef39de196bcc29e	0a967780321add1ec3dc358acb17b3ff	0.99403
9ff870beffc06840cef39de196bcc29e	bdb19eb6ef13bfed15a7ebb821a6d403	0.99403
e11b4263eb7a82f04b0bc4333a6bad57	60c0b3ef3f120e37a029f9f74dd4fe22	0.99403
e11b4263eb7a82f04b0bc4333a6bad57	e5842c9c88530748259c56a35e84fb9a	0.99403
e11b4263eb7a82f04b0bc4333a6bad57	05734150853338b5e489721794a7c826	0.99403
e11b4263eb7a82f04b0bc4333a6bad57	9c94712b0ac128883aeed3cf0cd696c7	0.99403
e11b4263eb7a82f04b0bc4333a6bad57	696fcd39d96eaa84510ddbb3e00d8263	0.99403
e11b4263eb7a82f04b0bc4333a6bad57	8c68c8f1ca3ceb58bd95ff2e2f7444af	0.99403
e11b4263eb7a82f04b0bc4333a6bad57	79b7674106bc3fb9eccf73c5bd64bfb5	0.99403
e11b4263eb7a82f04b0bc4333a6bad57	aa13b33f5e1937ef92b901d75f190fbe	0.99403
e11b4263eb7a82f04b0bc4333a6bad57	69916a1cde832bb15ac5acc0ef5e3518	0.99403
e11b4263eb7a82f04b0bc4333a6bad57	6d17ed796a25ea35dc19e67c30960976	0.99403
bf4864246283a3df9d2d93cd25ea6c74	8cf51cdf7c7c33f95196eed87ff337de	0.99403
bf4864246283a3df9d2d93cd25ea6c74	f1bb935fa8a308892ff011e7813dfc5c	0.99403
bf4864246283a3df9d2d93cd25ea6c74	84e422b114928ef1d913b13075ca5903	0.99403
bf4864246283a3df9d2d93cd25ea6c74	736281d70ec672edc46ef1986b47e1a9	0.99403
bf4864246283a3df9d2d93cd25ea6c74	092eca9cd442d861a0923e8ff485bfe1	0.99403
bf4864246283a3df9d2d93cd25ea6c74	8080b535f4bf339a8d5fee285ddab60b	0.99403
bf4864246283a3df9d2d93cd25ea6c74	bce23b9b289bb43bff25cd148f080557	0.99403
bf4864246283a3df9d2d93cd25ea6c74	679dbf70f65f5ada0f1716630019651d	0.99403
bf4864246283a3df9d2d93cd25ea6c74	8bd33e664b9a859086f52c1737c36339	0.99403
bf4864246283a3df9d2d93cd25ea6c74	afede6d9aa8210bc3d25c9253a7a4f84	0.99403
bf4864246283a3df9d2d93cd25ea6c74	fcb732848a3d018dde12adafdf5fa5f9	0.99403
bf4864246283a3df9d2d93cd25ea6c74	9e8523807c59f3603834a25cbcd86494	0.99403
bf4864246283a3df9d2d93cd25ea6c74	3f1304fc1b0de80cad541bdcff9676a5	0.99403
bf486bb1d9da587f9f41912eee4b2e77	d9b7d98120e626b2f0f10e3febe8682c	0.99403
bf486bb1d9da587f9f41912eee4b2e77	f1bb935fa8a308892ff011e7813dfc5c	0.99403
bf486bb1d9da587f9f41912eee4b2e77	22f26cc2c7277df74d59aa1f5adb05e4	0.99403
bf486bb1d9da587f9f41912eee4b2e77	e39b0a8cf183344fae62c2e14a46a910	0.99403
bf486bb1d9da587f9f41912eee4b2e77	092eca9cd442d861a0923e8ff485bfe1	0.99403
bf486bb1d9da587f9f41912eee4b2e77	c22273f574a6358a8544884020f7a822	0.99403
bf486bb1d9da587f9f41912eee4b2e77	59702671fe9c6d0fafd8225d1f68bd1f	0.99403
bf486bb1d9da587f9f41912eee4b2e77	679dbf70f65f5ada0f1716630019651d	0.99403
bf486bb1d9da587f9f41912eee4b2e77	cd98632699c5f92b428dd2337fc27563	0.99403
69a038a32cdce0e9c59aa15868003dc0	8f9f1aae9646df33f47a6cf3fe8e9739	0.99403
69a038a32cdce0e9c59aa15868003dc0	2c914ca6839f67afcfecf21668190d7e	0.99403
69a038a32cdce0e9c59aa15868003dc0	c0086f50c449526558dcbb7fd569043f	0.99403
69a038a32cdce0e9c59aa15868003dc0	b34fb0904caa8c1db6df0f5cb24da6b2	0.99403
69a038a32cdce0e9c59aa15868003dc0	47591358addd7be611d87aa5fb1d0501	0.99403
69a038a32cdce0e9c59aa15868003dc0	c1b64e9ee44cded7174eb92430f7ac95	0.99403
69a038a32cdce0e9c59aa15868003dc0	d9db432ac0d299dffcadd359c0e7120b	0.99403
69a038a32cdce0e9c59aa15868003dc0	a446207351cbb3a918183507652fbb97	0.99403
69a038a32cdce0e9c59aa15868003dc0	4cdf9aeb68a51fc2fff2f82e2e682c5b	0.99403
69a038a32cdce0e9c59aa15868003dc0	4975e9498ed5c0822a2f200287a6c612	0.99403
69a038a32cdce0e9c59aa15868003dc0	55ba03929d537e43f91aa98c36421f34	0.99403
c5110bc820a22854866d6b5ee21344c2	60c0b3ef3f120e37a029f9f74dd4fe22	0.99403
c5110bc820a22854866d6b5ee21344c2	7fc0ccbd86b09190f44369a934b3456c	0.99403
c5110bc820a22854866d6b5ee21344c2	da17572657f5636c66a5ce8c2d04922f	0.99403
8cf51cdf7c7c33f95196eed87ff337de	84e422b114928ef1d913b13075ca5903	0.99403
8cf51cdf7c7c33f95196eed87ff337de	736281d70ec672edc46ef1986b47e1a9	0.99403
8cf51cdf7c7c33f95196eed87ff337de	8080b535f4bf339a8d5fee285ddab60b	0.99403
8cf51cdf7c7c33f95196eed87ff337de	bce23b9b289bb43bff25cd148f080557	0.99403
8cf51cdf7c7c33f95196eed87ff337de	8bd33e664b9a859086f52c1737c36339	0.99403
8cf51cdf7c7c33f95196eed87ff337de	afede6d9aa8210bc3d25c9253a7a4f84	0.99403
8cf51cdf7c7c33f95196eed87ff337de	fcb732848a3d018dde12adafdf5fa5f9	0.99403
8cf51cdf7c7c33f95196eed87ff337de	9e8523807c59f3603834a25cbcd86494	0.99403
8cf51cdf7c7c33f95196eed87ff337de	3f1304fc1b0de80cad541bdcff9676a5	0.99403
d2ab948d10088c5dc2d6ebc1858bc08a	d6165e0582a03dd12b473c294cdd3bcd	0.99403
d2ab948d10088c5dc2d6ebc1858bc08a	d8783ee923cd85c2a36a867210303e03	0.99403
f7e6c08a092ded8ff3312cab3b1b2f2d	a3ce2b76a5b2daccdcc5c58ee218896a	0.99403
60d593dcc8007742d4962bd8ab803953	5becdcb4c3c8cfac25525c0b7e4ff555	0.99403
8e5281a27251d237ae4b293a88ea1fca	493972dbac72c6de5d9e0713cb321192	0.99403
8e5281a27251d237ae4b293a88ea1fca	82e4b4a214f2418f9f684f6e28464431	0.99403
8e5281a27251d237ae4b293a88ea1fca	f3ec851b710817bb01a81540c8a17a53	0.99403
8e5281a27251d237ae4b293a88ea1fca	4201c8cbbc7f7323b35e8fbdb4f7704a	0.99403
8e5281a27251d237ae4b293a88ea1fca	2c914ca6839f67afcfecf21668190d7e	0.99403
8e5281a27251d237ae4b293a88ea1fca	47591358addd7be611d87aa5fb1d0501	0.99403
f1fec4dfaa2202d002a437cc4a248e66	d9b7d98120e626b2f0f10e3febe8682c	0.99403
f1fec4dfaa2202d002a437cc4a248e66	93b2cb19723f915a805a4cd20f594f07	0.99403
f1fec4dfaa2202d002a437cc4a248e66	22f26cc2c7277df74d59aa1f5adb05e4	0.99403
f1fec4dfaa2202d002a437cc4a248e66	59702671fe9c6d0fafd8225d1f68bd1f	0.99403
f1fec4dfaa2202d002a437cc4a248e66	ccedbacba71f5225e8911acbd4552b5d	0.99403
53b359329adc6fecebfc0eb42b6c0e71	9f694ae065fcfcf17a298da89935a0c7	0.99403
53b359329adc6fecebfc0eb42b6c0e71	b991efbddcb23a9ce7cf362a9a85f7dd	0.99403
493972dbac72c6de5d9e0713cb321192	82e4b4a214f2418f9f684f6e28464431	0.99403
493972dbac72c6de5d9e0713cb321192	f3ec851b710817bb01a81540c8a17a53	0.99403
493972dbac72c6de5d9e0713cb321192	4201c8cbbc7f7323b35e8fbdb4f7704a	0.99403
493972dbac72c6de5d9e0713cb321192	2c914ca6839f67afcfecf21668190d7e	0.99403
493972dbac72c6de5d9e0713cb321192	47591358addd7be611d87aa5fb1d0501	0.99403
2265a564eb3d7c2e1660a58fa49aae64	7f02f8891c18a78c1ca3b37b4aa5ee79	0.99403
b800ef37e180548cc94019d2c15a2d8d	6dfadde7fb5268d8c6b03f5820ed9540	0.99403
b800ef37e180548cc94019d2c15a2d8d	6914f32d9ee2679f7f74b6d5f8f1e9e7	0.99403
b800ef37e180548cc94019d2c15a2d8d	c6911e1ac67555f4a10f39df29c35a82	0.99403
b800ef37e180548cc94019d2c15a2d8d	9d510a1ee7233ab15bca064515917a04	0.99403
b800ef37e180548cc94019d2c15a2d8d	9b35d30a98d76cf13631eb86a5213d14	0.99403
6dfadde7fb5268d8c6b03f5820ed9540	6914f32d9ee2679f7f74b6d5f8f1e9e7	0.99403
6dfadde7fb5268d8c6b03f5820ed9540	c6911e1ac67555f4a10f39df29c35a82	0.99403
6dfadde7fb5268d8c6b03f5820ed9540	9d510a1ee7233ab15bca064515917a04	0.99403
6dfadde7fb5268d8c6b03f5820ed9540	9b35d30a98d76cf13631eb86a5213d14	0.99403
60c0b3ef3f120e37a029f9f74dd4fe22	e5842c9c88530748259c56a35e84fb9a	0.99403
60c0b3ef3f120e37a029f9f74dd4fe22	05734150853338b5e489721794a7c826	0.99403
60c0b3ef3f120e37a029f9f74dd4fe22	9c94712b0ac128883aeed3cf0cd696c7	0.99403
60c0b3ef3f120e37a029f9f74dd4fe22	696fcd39d96eaa84510ddbb3e00d8263	0.99403
60c0b3ef3f120e37a029f9f74dd4fe22	8c68c8f1ca3ceb58bd95ff2e2f7444af	0.99403
60c0b3ef3f120e37a029f9f74dd4fe22	79b7674106bc3fb9eccf73c5bd64bfb5	0.99403
60c0b3ef3f120e37a029f9f74dd4fe22	aa13b33f5e1937ef92b901d75f190fbe	0.99403
60c0b3ef3f120e37a029f9f74dd4fe22	69916a1cde832bb15ac5acc0ef5e3518	0.99403
60c0b3ef3f120e37a029f9f74dd4fe22	6d17ed796a25ea35dc19e67c30960976	0.99403
82e4b4a214f2418f9f684f6e28464431	f3ec851b710817bb01a81540c8a17a53	0.99403
82e4b4a214f2418f9f684f6e28464431	4201c8cbbc7f7323b35e8fbdb4f7704a	0.99403
82e4b4a214f2418f9f684f6e28464431	2c914ca6839f67afcfecf21668190d7e	0.99403
82e4b4a214f2418f9f684f6e28464431	47591358addd7be611d87aa5fb1d0501	0.99403
0a967780321add1ec3dc358acb17b3ff	bdb19eb6ef13bfed15a7ebb821a6d403	0.99403
3ceb758c49920cee71fe6e65c3493a43	e6f36661db6fbcff3ccc39aa0a823810	0.99403
3ceb758c49920cee71fe6e65c3493a43	e7738cf0bb82ac429231fb6fded5e47a	0.99403
3ceb758c49920cee71fe6e65c3493a43	e4db4b69f4dcb92e21a950f284ec8b75	0.99403
3ceb758c49920cee71fe6e65c3493a43	422efbd87a37e2b1e7b7fa621cc99374	0.99403
3ceb758c49920cee71fe6e65c3493a43	c6911e1ac67555f4a10f39df29c35a82	0.99403
3ceb758c49920cee71fe6e65c3493a43	90a3648550c58dac0d8a380eeeb8cf17	0.99403
3ceb758c49920cee71fe6e65c3493a43	9d510a1ee7233ab15bca064515917a04	0.99403
3ceb758c49920cee71fe6e65c3493a43	9b35d30a98d76cf13631eb86a5213d14	0.99403
3ceb758c49920cee71fe6e65c3493a43	96a9773aa46a3d58007f76fad394d5f4	0.99403
3ceb758c49920cee71fe6e65c3493a43	8c357abf174733947c627dde698d3f93	0.99403
da84b875691faabf9bc768ea4ed6851a	1438af8d3f304470c4aee3d93544521e	0.99403
5a6ac5dc72f33d90bc3e9891f2564f84	441b997bec002a7fe05e0ad7e4bfc14e	0.99403
5a6ac5dc72f33d90bc3e9891f2564f84	82c9e178eb04788207c4d1da199ee71b	0.99403
5a6ac5dc72f33d90bc3e9891f2564f84	22a7879edff5dac58a2323ea2f5f00cf	0.99403
5a6ac5dc72f33d90bc3e9891f2564f84	4cdf9aeb68a51fc2fff2f82e2e682c5b	0.99403
5656b737706ec07029a2669e0c1f904b	d6165e0582a03dd12b473c294cdd3bcd	0.99403
5656b737706ec07029a2669e0c1f904b	8080b535f4bf339a8d5fee285ddab60b	0.99403
4d87d614337faa60df423f918a0978b3	3437f453277efee108b6338b65ec716d	0.99403
4d87d614337faa60df423f918a0978b3	f20ee43e33f1279fad16f974401722fe	0.99403
cc8866f3920c1a4759b779a2afe615fa	0315be37f6165f1e87335603ad7d63e9	0.99403
cc8866f3920c1a4759b779a2afe615fa	bc61c16683aa91f4a47a2266993a69d1	0.99403
6914f32d9ee2679f7f74b6d5f8f1e9e7	c6911e1ac67555f4a10f39df29c35a82	0.99403
1c926ca8fd259c89ece07dfe79c62dfa	5e6553c89aa09df554730e0e0dcddff2	0.99403
1c926ca8fd259c89ece07dfe79c62dfa	5511d7e46c7812c750470a3d28c32f4d	0.99403
1c926ca8fd259c89ece07dfe79c62dfa	10ca86dccfe1472117a0599a1f4f1635	0.99403
1c926ca8fd259c89ece07dfe79c62dfa	0f6006dc9edddee73c4e03a918c3aa66	0.99403
1c926ca8fd259c89ece07dfe79c62dfa	fa493aa4f1faf6be9820d19f83cdd969	0.99403
1c926ca8fd259c89ece07dfe79c62dfa	759ac655001806785218ecfb18b06a1d	0.99403
1c926ca8fd259c89ece07dfe79c62dfa	b42fc99cbb9150042fb31318bd88b12c	0.99403
1c926ca8fd259c89ece07dfe79c62dfa	96c5f928b96ff41ecf26e1e13259fa64	0.99403
1c926ca8fd259c89ece07dfe79c62dfa	a018dfb928f901a2fbc3ee62c0e7362b	0.99403
1c926ca8fd259c89ece07dfe79c62dfa	2652f19ead90e82ed89bbfd4143f6b0c	0.99403
a9fe2fa970bc4b6487df11daf151ee81	6005a02ca4a778165ea119d7f2dab69f	0.99403
8f9f1aae9646df33f47a6cf3fe8e9739	f1bb935fa8a308892ff011e7813dfc5c	0.99403
8f9f1aae9646df33f47a6cf3fe8e9739	2c914ca6839f67afcfecf21668190d7e	0.99403
8f9f1aae9646df33f47a6cf3fe8e9739	c0086f50c449526558dcbb7fd569043f	0.99403
8f9f1aae9646df33f47a6cf3fe8e9739	092eca9cd442d861a0923e8ff485bfe1	0.99403
8f9f1aae9646df33f47a6cf3fe8e9739	b34fb0904caa8c1db6df0f5cb24da6b2	0.99403
8f9f1aae9646df33f47a6cf3fe8e9739	47591358addd7be611d87aa5fb1d0501	0.99403
8f9f1aae9646df33f47a6cf3fe8e9739	c1b64e9ee44cded7174eb92430f7ac95	0.99403
8f9f1aae9646df33f47a6cf3fe8e9739	679dbf70f65f5ada0f1716630019651d	0.99403
8f9f1aae9646df33f47a6cf3fe8e9739	d9db432ac0d299dffcadd359c0e7120b	0.99403
8f9f1aae9646df33f47a6cf3fe8e9739	a446207351cbb3a918183507652fbb97	0.99403
8f9f1aae9646df33f47a6cf3fe8e9739	4cdf9aeb68a51fc2fff2f82e2e682c5b	0.99403
8f9f1aae9646df33f47a6cf3fe8e9739	4975e9498ed5c0822a2f200287a6c612	0.99403
8f9f1aae9646df33f47a6cf3fe8e9739	55ba03929d537e43f91aa98c36421f34	0.99403
d9b7d98120e626b2f0f10e3febe8682c	22f26cc2c7277df74d59aa1f5adb05e4	0.99403
d9b7d98120e626b2f0f10e3febe8682c	e39b0a8cf183344fae62c2e14a46a910	0.99403
d9b7d98120e626b2f0f10e3febe8682c	c22273f574a6358a8544884020f7a822	0.99403
d9b7d98120e626b2f0f10e3febe8682c	59702671fe9c6d0fafd8225d1f68bd1f	0.99403
d9b7d98120e626b2f0f10e3febe8682c	cd98632699c5f92b428dd2337fc27563	0.99403
d9b7d98120e626b2f0f10e3febe8682c	ccedbacba71f5225e8911acbd4552b5d	0.99403
e5842c9c88530748259c56a35e84fb9a	05734150853338b5e489721794a7c826	0.99403
e5842c9c88530748259c56a35e84fb9a	9c94712b0ac128883aeed3cf0cd696c7	0.99403
e5842c9c88530748259c56a35e84fb9a	696fcd39d96eaa84510ddbb3e00d8263	0.99403
e5842c9c88530748259c56a35e84fb9a	8c68c8f1ca3ceb58bd95ff2e2f7444af	0.99403
e5842c9c88530748259c56a35e84fb9a	79b7674106bc3fb9eccf73c5bd64bfb5	0.99403
e5842c9c88530748259c56a35e84fb9a	aa13b33f5e1937ef92b901d75f190fbe	0.99403
e5842c9c88530748259c56a35e84fb9a	69916a1cde832bb15ac5acc0ef5e3518	0.99403
e5842c9c88530748259c56a35e84fb9a	6d17ed796a25ea35dc19e67c30960976	0.99403
efebe77af15ff501e89f88e27ae9ca8b	1659d7acb4a55ff27e3cbfc218639b9c	0.99403
e6f36661db6fbcff3ccc39aa0a823810	e7738cf0bb82ac429231fb6fded5e47a	0.99403
e6f36661db6fbcff3ccc39aa0a823810	e4db4b69f4dcb92e21a950f284ec8b75	0.99403
e6f36661db6fbcff3ccc39aa0a823810	422efbd87a37e2b1e7b7fa621cc99374	0.99403
e6f36661db6fbcff3ccc39aa0a823810	c6911e1ac67555f4a10f39df29c35a82	0.99403
e6f36661db6fbcff3ccc39aa0a823810	90a3648550c58dac0d8a380eeeb8cf17	0.99403
e6f36661db6fbcff3ccc39aa0a823810	9d510a1ee7233ab15bca064515917a04	0.99403
e6f36661db6fbcff3ccc39aa0a823810	7ee887337d29a3cd41f4648bbd1ef6ba	0.99403
e6f36661db6fbcff3ccc39aa0a823810	9b35d30a98d76cf13631eb86a5213d14	0.99403
e6f36661db6fbcff3ccc39aa0a823810	96a9773aa46a3d58007f76fad394d5f4	0.99403
e6f36661db6fbcff3ccc39aa0a823810	8c357abf174733947c627dde698d3f93	0.99403
79b035a12b3b42cfb548824c6bdc72a4	c7f8f0fbe7bf7c181bcede842f9e9da2	0.99403
93b2cb19723f915a805a4cd20f594f07	22f26cc2c7277df74d59aa1f5adb05e4	0.99403
93b2cb19723f915a805a4cd20f594f07	59702671fe9c6d0fafd8225d1f68bd1f	0.99403
93b2cb19723f915a805a4cd20f594f07	ccedbacba71f5225e8911acbd4552b5d	0.99403
16bf085946684ed5fe695352fdaa04bd	d3cc6fe93c28df4a00e082ab2e2a0017	0.99403
1ef2eca98f33e2c8a632157be5059bfb	74671b83e5c4600d0b1955b4c17ffb5c	0.99403
7fc0ccbd86b09190f44369a934b3456c	da17572657f5636c66a5ce8c2d04922f	0.99403
67f59db4c23e06a8484ab88a3e520323	14525301bb4271314d10e75fe308a602	0.99403
5610f9fd4d05131f3274383ca5be7ed2	ce62e1f26d0adbb3fff55b907a4a777a	0.99403
2ffc32fd670446fa2a95b2209aaf1a9a	3b3bbab9ab17d53dd61ce47bd1aef746	0.99403
2ffc32fd670446fa2a95b2209aaf1a9a	4626abe1b3958f24002d1d38b7e8ac91	0.99403
7b1896181def8abf5ada238339bed916	0abe519a9a8a45aa86cceaf9f3c33f05	0.99403
7b1896181def8abf5ada238339bed916	3fc31391229b05e4b66e7950f1548840	0.99403
1040ffc55a036894e9ec2cbe47802e07	8645ac02dc586fcd4a083b94279834f7	0.99403
1040ffc55a036894e9ec2cbe47802e07	fcb732848a3d018dde12adafdf5fa5f9	0.99403
1040ffc55a036894e9ec2cbe47802e07	522f072a3e8ca88b8f8bdecea04465d9	0.99403
d05ccd98167a72d13ec85a2e81c2da06	522f072a3e8ca88b8f8bdecea04465d9	0.99403
5100343c1e946364d20e495e3e209bc6	fbe36876d118508cf7e4fb67cbc032e2	0.99403
5100343c1e946364d20e495e3e209bc6	d56d487973829be6bedf092e2fc3b90e	0.99403
5100343c1e946364d20e495e3e209bc6	eb56533502639959923e46d4d4ce2d36	0.99403
eb32459bd42821aedd3001b8cfbb676e	9b03b9f9eb72fe49be3d2e4ee544f849	0.99403
5511d7e46c7812c750470a3d28c32f4d	10ca86dccfe1472117a0599a1f4f1635	0.99403
5511d7e46c7812c750470a3d28c32f4d	0f6006dc9edddee73c4e03a918c3aa66	0.99403
5511d7e46c7812c750470a3d28c32f4d	fa493aa4f1faf6be9820d19f83cdd969	0.99403
5511d7e46c7812c750470a3d28c32f4d	759ac655001806785218ecfb18b06a1d	0.99403
5511d7e46c7812c750470a3d28c32f4d	b42fc99cbb9150042fb31318bd88b12c	0.99403
5511d7e46c7812c750470a3d28c32f4d	96c5f928b96ff41ecf26e1e13259fa64	0.99403
5511d7e46c7812c750470a3d28c32f4d	a018dfb928f901a2fbc3ee62c0e7362b	0.99403
5511d7e46c7812c750470a3d28c32f4d	2652f19ead90e82ed89bbfd4143f6b0c	0.99403
7ba3d25c1364399fcd59076c4d90732b	6916d97494489296801671b8d18a0309	0.99403
7ba3d25c1364399fcd59076c4d90732b	0b04a06598d5b5b3f758c73cb8792ab9	0.99403
7ba3d25c1364399fcd59076c4d90732b	023ec9fb40715844e7a702c82c060480	0.99403
d1c3545aa01f01c148c8b11eef74200b	db15ab9a45047795ca19c70acb4bee26	0.99403
7c762c36ae20866e1998a696f50f9716	9bae969e46731bfb02da1c09e93c5605	0.99403
7c762c36ae20866e1998a696f50f9716	0915263f5f4c5ca4e656773ecaeddd7a	0.99403
7c762c36ae20866e1998a696f50f9716	93c1449aef105c81ee44691574a04fa6	0.99403
7c762c36ae20866e1998a696f50f9716	4ec07abdb860bda723972447dfa55ddc	0.99403
76d2032108822bcfaa90a4873f7a51aa	37f45f705bfc321df25ab0c8063a9618	0.99403
d6165e0582a03dd12b473c294cdd3bcd	8080b535f4bf339a8d5fee285ddab60b	0.99403
08aeba14cd002cb375f0f880423b0373	90a3648550c58dac0d8a380eeeb8cf17	0.99403
08aeba14cd002cb375f0f880423b0373	51262c0e7e875ebe8e03cf077ac177c5	0.99403
08aeba14cd002cb375f0f880423b0373	96a9773aa46a3d58007f76fad394d5f4	0.99403
f1bb935fa8a308892ff011e7813dfc5c	092eca9cd442d861a0923e8ff485bfe1	0.99403
f1bb935fa8a308892ff011e7813dfc5c	6f2548da34731900e68ee1bbeed4a579	0.99403
f1bb935fa8a308892ff011e7813dfc5c	c22273f574a6358a8544884020f7a822	0.99403
f1bb935fa8a308892ff011e7813dfc5c	c1b64e9ee44cded7174eb92430f7ac95	0.99403
f1bb935fa8a308892ff011e7813dfc5c	679dbf70f65f5ada0f1716630019651d	0.99403
f1bb935fa8a308892ff011e7813dfc5c	d9db432ac0d299dffcadd359c0e7120b	0.99403
f1bb935fa8a308892ff011e7813dfc5c	cd98632699c5f92b428dd2337fc27563	0.99403
f1bb935fa8a308892ff011e7813dfc5c	4ec07abdb860bda723972447dfa55ddc	0.99403
f1bb935fa8a308892ff011e7813dfc5c	675f47f52ab28cdcf30e23836997082e	0.99403
f1bb935fa8a308892ff011e7813dfc5c	9fc85a26ba4e62372a0510e76a6e616b	0.99403
f1bb935fa8a308892ff011e7813dfc5c	55ba03929d537e43f91aa98c36421f34	0.99403
60f980bd7c0b414ac99a2c7faeae33bd	19e9d62d5004a2940cf444e3390c37ff	0.99403
eda6f9881bff8aea35a15d26cc534efd	e39b0a8cf183344fae62c2e14a46a910	0.99403
10ca86dccfe1472117a0599a1f4f1635	0f6006dc9edddee73c4e03a918c3aa66	0.99403
10ca86dccfe1472117a0599a1f4f1635	fa493aa4f1faf6be9820d19f83cdd969	0.99403
10ca86dccfe1472117a0599a1f4f1635	759ac655001806785218ecfb18b06a1d	0.99403
10ca86dccfe1472117a0599a1f4f1635	b42fc99cbb9150042fb31318bd88b12c	0.99403
10ca86dccfe1472117a0599a1f4f1635	96c5f928b96ff41ecf26e1e13259fa64	0.99403
10ca86dccfe1472117a0599a1f4f1635	a018dfb928f901a2fbc3ee62c0e7362b	0.99403
10ca86dccfe1472117a0599a1f4f1635	2652f19ead90e82ed89bbfd4143f6b0c	0.99403
8645ac02dc586fcd4a083b94279834f7	441b997bec002a7fe05e0ad7e4bfc14e	0.99403
8645ac02dc586fcd4a083b94279834f7	64bcf94b568e9cbaa0404d841ad75435	0.99403
8645ac02dc586fcd4a083b94279834f7	a3ce2b76a5b2daccdcc5c58ee218896a	0.99403
1438af8d3f304470c4aee3d93544521e	61ab824b63756fa52f4adc38774d9cfd	0.99403
66c5253c6d7fc739b2d882966842f805	c8583ffc493e6da2028670a01931b6a7	0.99403
66c5253c6d7fc739b2d882966842f805	c8d1e36cf0bc1f33faf48ef2b3a2cf41	0.99403
66c5253c6d7fc739b2d882966842f805	4f33f9170e3d2e17aa38281ce119a0d2	0.99403
22f26cc2c7277df74d59aa1f5adb05e4	59702671fe9c6d0fafd8225d1f68bd1f	0.99403
22f26cc2c7277df74d59aa1f5adb05e4	cd98632699c5f92b428dd2337fc27563	0.99403
22f26cc2c7277df74d59aa1f5adb05e4	ccedbacba71f5225e8911acbd4552b5d	0.99403
566cad8c05c2852195e900301d143443	1c6a8d82c50697fc1082823692d45758	0.99403
33ec2672acc39980a0e805c26d08cb79	99847a0aad4c578374c41bae937991b6	0.99403
33ec2672acc39980a0e805c26d08cb79	7233e4cdaface6927d43773c964f94e4	0.99403
33ec2672acc39980a0e805c26d08cb79	f6608e71c06674d8840e9cb8ccb2e74d	0.99403
33ec2672acc39980a0e805c26d08cb79	fcaeef384902686a3bb1a45b9fd73d3c	0.99403
33ec2672acc39980a0e805c26d08cb79	f2816e09b5444945d9cb7c5c801d427d	0.99403
33ec2672acc39980a0e805c26d08cb79	e543abb5f12c23a50072118b9454f001	0.99403
cefbbaabbe2748b243095e71e7b86265	e7738cf0bb82ac429231fb6fded5e47a	0.99403
cefbbaabbe2748b243095e71e7b86265	99847a0aad4c578374c41bae937991b6	0.99403
cefbbaabbe2748b243095e71e7b86265	e4db4b69f4dcb92e21a950f284ec8b75	0.99403
cefbbaabbe2748b243095e71e7b86265	7233e4cdaface6927d43773c964f94e4	0.99403
cefbbaabbe2748b243095e71e7b86265	422efbd87a37e2b1e7b7fa621cc99374	0.99403
cefbbaabbe2748b243095e71e7b86265	f6608e71c06674d8840e9cb8ccb2e74d	0.99403
cefbbaabbe2748b243095e71e7b86265	bdb19eb6ef13bfed15a7ebb821a6d403	0.99403
cefbbaabbe2748b243095e71e7b86265	8c357abf174733947c627dde698d3f93	0.99403
59b2fcb3a698ac31bfbbb6b3c4b4f356	7cfed4230313e2ab5c148fe5aa34fe1c	0.99403
f3ec851b710817bb01a81540c8a17a53	4201c8cbbc7f7323b35e8fbdb4f7704a	0.99403
f3ec851b710817bb01a81540c8a17a53	2c914ca6839f67afcfecf21668190d7e	0.99403
f3ec851b710817bb01a81540c8a17a53	47591358addd7be611d87aa5fb1d0501	0.99403
790e976dfd7c72094f38aee1b759d212	9f694ae065fcfcf17a298da89935a0c7	0.99403
790e976dfd7c72094f38aee1b759d212	c3b62664bd1a4c55ed9dcd8c92b33583	0.99403
790e976dfd7c72094f38aee1b759d212	5f042513c67fdd55888051594cb486ac	0.99403
05d8c38aa39c708e6f1f4f29ee655f38	4819e8a06d5d9c28790f1793f527dfda	0.99403
05d8c38aa39c708e6f1f4f29ee655f38	f76d0ff8b2a18523b391183ec0615549	0.99403
05d8c38aa39c708e6f1f4f29ee655f38	0bd0f6f1464e5c3b3725a1b55774a667	0.99403
443164c71768102f8656148048472610	4dd120c42c5cdd3a2243b85667c65f86	0.99403
443164c71768102f8656148048472610	4819e8a06d5d9c28790f1793f527dfda	0.99403
8d2788d498bc6528a24e66350380fb78	63bf8d81940fc455b5cc541cc7a660bb	0.99403
8d2788d498bc6528a24e66350380fb78	a824b066eb0b77c728cfab213da2e002	0.99403
8d2788d498bc6528a24e66350380fb78	878ac7527f7fdf86178eaa89ab6398fe	0.99403
8d2788d498bc6528a24e66350380fb78	70c3da9a368397a37246d8dcdf38f4cb	0.99403
e7738cf0bb82ac429231fb6fded5e47a	99847a0aad4c578374c41bae937991b6	0.99403
e7738cf0bb82ac429231fb6fded5e47a	e4db4b69f4dcb92e21a950f284ec8b75	0.99403
e7738cf0bb82ac429231fb6fded5e47a	7233e4cdaface6927d43773c964f94e4	0.99403
e7738cf0bb82ac429231fb6fded5e47a	422efbd87a37e2b1e7b7fa621cc99374	0.99403
e7738cf0bb82ac429231fb6fded5e47a	f6608e71c06674d8840e9cb8ccb2e74d	0.99403
e7738cf0bb82ac429231fb6fded5e47a	bdb19eb6ef13bfed15a7ebb821a6d403	0.99403
e7738cf0bb82ac429231fb6fded5e47a	9b35d30a98d76cf13631eb86a5213d14	0.99403
e7738cf0bb82ac429231fb6fded5e47a	8c357abf174733947c627dde698d3f93	0.99403
0166ac0863837f3e87a4a75afd9e7ddf	ad21821d85b6e1907c8a16adaa3c10ff	0.99403
0166ac0863837f3e87a4a75afd9e7ddf	1567b4dacafc28391f53de9efb63c5b9	0.99403
7cfed4230313e2ab5c148fe5aa34fe1c	8299aadd889b6ed7e5ca688053e8acb5	0.99403
fbe36876d118508cf7e4fb67cbc032e2	8a13f20e0e4548413b745bf51c9980b3	0.99403
fbe36876d118508cf7e4fb67cbc032e2	1dad302680b9cc2a56187e8bdfb1cf58	0.99403
fbe36876d118508cf7e4fb67cbc032e2	eb56533502639959923e46d4d4ce2d36	0.99403
fbe36876d118508cf7e4fb67cbc032e2	c2146a3af5097133d4583f03c3a6b4a5	0.99403
9f694ae065fcfcf17a298da89935a0c7	c3b62664bd1a4c55ed9dcd8c92b33583	0.99403
9f694ae065fcfcf17a298da89935a0c7	b991efbddcb23a9ce7cf362a9a85f7dd	0.99403
801463e61abcfcc2938e84e16c3929d6	fbba10bc26152630ec70583c4fb41d7d	0.99403
4e7254e7faee92f9868759c556ed73ae	1c044f905d54cfc6c740710cb2599c0f	0.99403
4e7254e7faee92f9868759c556ed73ae	fcaeef384902686a3bb1a45b9fd73d3c	0.99403
4e7254e7faee92f9868759c556ed73ae	0467b796cedda0e417b7e95a797eb8fd	0.99403
1c044f905d54cfc6c740710cb2599c0f	cf128de805981908ffc28e6be7a5f7e8	0.99403
1c044f905d54cfc6c740710cb2599c0f	0467b796cedda0e417b7e95a797eb8fd	0.99403
1c044f905d54cfc6c740710cb2599c0f	bfc979fbc3bc5a4801c52c99b2891336	0.99403
99847a0aad4c578374c41bae937991b6	e4db4b69f4dcb92e21a950f284ec8b75	0.99403
99847a0aad4c578374c41bae937991b6	7233e4cdaface6927d43773c964f94e4	0.99403
99847a0aad4c578374c41bae937991b6	422efbd87a37e2b1e7b7fa621cc99374	0.99403
99847a0aad4c578374c41bae937991b6	f6608e71c06674d8840e9cb8ccb2e74d	0.99403
99847a0aad4c578374c41bae937991b6	bdb19eb6ef13bfed15a7ebb821a6d403	0.99403
99847a0aad4c578374c41bae937991b6	8c357abf174733947c627dde698d3f93	0.99403
bf7c8b35b60d08c0bf62fc2894b0a543	a73f97b94d85b164d70e228b442fd480	0.99403
b6be254413a7e7d160e6ca9101729245	db479043d01c7c0f52d725110a613bdc	0.99403
b6be254413a7e7d160e6ca9101729245	3a9208d106ad373e9d8528bbe6b9c5ad	0.99403
55814a4ea8a202d9b328c7b68584bf90	5f042513c67fdd55888051594cb486ac	0.99403
55814a4ea8a202d9b328c7b68584bf90	54a218d7e25df00236bb0e2ec1c02b79	0.99403
55814a4ea8a202d9b328c7b68584bf90	7a45e5e45d7fa0edc47f2289b8334a4e	0.99403
55814a4ea8a202d9b328c7b68584bf90	878ac7527f7fdf86178eaa89ab6398fe	0.99403
45ce9f54d9768cda11c5fd16fb7376f9	3548d70f9eb776a4c51d2f64abc3f1a1	0.99403
9bae969e46731bfb02da1c09e93c5605	0915263f5f4c5ca4e656773ecaeddd7a	0.99403
9bae969e46731bfb02da1c09e93c5605	93c1449aef105c81ee44691574a04fa6	0.99403
9bae969e46731bfb02da1c09e93c5605	4ec07abdb860bda723972447dfa55ddc	0.99403
d56d487973829be6bedf092e2fc3b90e	e131d6b9e4f997788460a450a69c3a99	0.99403
d56d487973829be6bedf092e2fc3b90e	58b68525f7a335fdba75a3ce75720e07	0.99403
d56d487973829be6bedf092e2fc3b90e	eb56533502639959923e46d4d4ce2d36	0.99403
d56d487973829be6bedf092e2fc3b90e	49c1ac3db0834e9040ad888443339e6f	0.99403
05734150853338b5e489721794a7c826	9c94712b0ac128883aeed3cf0cd696c7	0.99403
05734150853338b5e489721794a7c826	696fcd39d96eaa84510ddbb3e00d8263	0.99403
05734150853338b5e489721794a7c826	8c68c8f1ca3ceb58bd95ff2e2f7444af	0.99403
05734150853338b5e489721794a7c826	79b7674106bc3fb9eccf73c5bd64bfb5	0.99403
05734150853338b5e489721794a7c826	aa13b33f5e1937ef92b901d75f190fbe	0.99403
05734150853338b5e489721794a7c826	69916a1cde832bb15ac5acc0ef5e3518	0.99403
05734150853338b5e489721794a7c826	6d17ed796a25ea35dc19e67c30960976	0.99403
6a8d7b9353cb4112e42bc9975048431c	8ed57f2c85eafc0de2666de03e90eb14	0.99403
d239e96a3f1ad1ebf4ed9aee42656456	1ee948b5ef1c4af93bce919fe1350f59	0.99403
d239e96a3f1ad1ebf4ed9aee42656456	b06d1f86a1336811966c0e55dafe5152	0.99403
60da738bc4b046c5c5c7b22f77832a90	0a7cff6daea23145cea146dfb78df6df	0.99403
60da738bc4b046c5c5c7b22f77832a90	0f6006dc9edddee73c4e03a918c3aa66	0.99403
60da738bc4b046c5c5c7b22f77832a90	fa493aa4f1faf6be9820d19f83cdd969	0.99403
60da738bc4b046c5c5c7b22f77832a90	759ac655001806785218ecfb18b06a1d	0.99403
60da738bc4b046c5c5c7b22f77832a90	b092f7f3425cc2dfc9965117ab63717d	0.99403
60da738bc4b046c5c5c7b22f77832a90	20dd251ae02aea592d801d239b63f9e4	0.99403
e4db4b69f4dcb92e21a950f284ec8b75	422efbd87a37e2b1e7b7fa621cc99374	0.99403
e4db4b69f4dcb92e21a950f284ec8b75	c6911e1ac67555f4a10f39df29c35a82	0.99403
e4db4b69f4dcb92e21a950f284ec8b75	90a3648550c58dac0d8a380eeeb8cf17	0.99403
e4db4b69f4dcb92e21a950f284ec8b75	9d510a1ee7233ab15bca064515917a04	0.99403
e4db4b69f4dcb92e21a950f284ec8b75	9b35d30a98d76cf13631eb86a5213d14	0.99403
e4db4b69f4dcb92e21a950f284ec8b75	96a9773aa46a3d58007f76fad394d5f4	0.99403
e4db4b69f4dcb92e21a950f284ec8b75	8c357abf174733947c627dde698d3f93	0.99403
d326168fdf6ef6133f3de28b021dcb0b	b9b5730119aeb35ad16030e2188cb3bf	0.99403
88e6f82436084085cc315124858fcceb	b991efbddcb23a9ce7cf362a9a85f7dd	0.99403
e39b0a8cf183344fae62c2e14a46a910	c22273f574a6358a8544884020f7a822	0.99403
e39b0a8cf183344fae62c2e14a46a910	59702671fe9c6d0fafd8225d1f68bd1f	0.99403
e39b0a8cf183344fae62c2e14a46a910	cd98632699c5f92b428dd2337fc27563	0.99403
2c914ca6839f67afcfecf21668190d7e	c0086f50c449526558dcbb7fd569043f	0.99403
2c914ca6839f67afcfecf21668190d7e	b34fb0904caa8c1db6df0f5cb24da6b2	0.99403
2c914ca6839f67afcfecf21668190d7e	47591358addd7be611d87aa5fb1d0501	0.99403
2c914ca6839f67afcfecf21668190d7e	c1b64e9ee44cded7174eb92430f7ac95	0.99403
2c914ca6839f67afcfecf21668190d7e	d9db432ac0d299dffcadd359c0e7120b	0.99403
2c914ca6839f67afcfecf21668190d7e	a446207351cbb3a918183507652fbb97	0.99403
2c914ca6839f67afcfecf21668190d7e	4cdf9aeb68a51fc2fff2f82e2e682c5b	0.99403
2c914ca6839f67afcfecf21668190d7e	4975e9498ed5c0822a2f200287a6c612	0.99403
2c914ca6839f67afcfecf21668190d7e	55ba03929d537e43f91aa98c36421f34	0.99403
265f93f99468f9605a5031488c920eb1	cf128de805981908ffc28e6be7a5f7e8	0.99403
265f93f99468f9605a5031488c920eb1	bfc979fbc3bc5a4801c52c99b2891336	0.99403
0a7cff6daea23145cea146dfb78df6df	0f6006dc9edddee73c4e03a918c3aa66	0.99403
0a7cff6daea23145cea146dfb78df6df	fa493aa4f1faf6be9820d19f83cdd969	0.99403
0a7cff6daea23145cea146dfb78df6df	759ac655001806785218ecfb18b06a1d	0.99403
0a7cff6daea23145cea146dfb78df6df	b092f7f3425cc2dfc9965117ab63717d	0.99403
0a7cff6daea23145cea146dfb78df6df	20dd251ae02aea592d801d239b63f9e4	0.99403
7233e4cdaface6927d43773c964f94e4	f6608e71c06674d8840e9cb8ccb2e74d	0.99403
7233e4cdaface6927d43773c964f94e4	f2816e09b5444945d9cb7c5c801d427d	0.99403
7233e4cdaface6927d43773c964f94e4	e543abb5f12c23a50072118b9454f001	0.99403
84e422b114928ef1d913b13075ca5903	8bd33e664b9a859086f52c1737c36339	0.99403
84e422b114928ef1d913b13075ca5903	3437f453277efee108b6338b65ec716d	0.99403
84e422b114928ef1d913b13075ca5903	f20ee43e33f1279fad16f974401722fe	0.99403
736281d70ec672edc46ef1986b47e1a9	8080b535f4bf339a8d5fee285ddab60b	0.99403
736281d70ec672edc46ef1986b47e1a9	bce23b9b289bb43bff25cd148f080557	0.99403
736281d70ec672edc46ef1986b47e1a9	8bd33e664b9a859086f52c1737c36339	0.99403
736281d70ec672edc46ef1986b47e1a9	afede6d9aa8210bc3d25c9253a7a4f84	0.99403
736281d70ec672edc46ef1986b47e1a9	fcb732848a3d018dde12adafdf5fa5f9	0.99403
736281d70ec672edc46ef1986b47e1a9	9e8523807c59f3603834a25cbcd86494	0.99403
736281d70ec672edc46ef1986b47e1a9	3f1304fc1b0de80cad541bdcff9676a5	0.99403
9c94712b0ac128883aeed3cf0cd696c7	64bcf94b568e9cbaa0404d841ad75435	0.99403
9c94712b0ac128883aeed3cf0cd696c7	696fcd39d96eaa84510ddbb3e00d8263	0.99403
9c94712b0ac128883aeed3cf0cd696c7	79b7674106bc3fb9eccf73c5bd64bfb5	0.99403
9c94712b0ac128883aeed3cf0cd696c7	aa13b33f5e1937ef92b901d75f190fbe	0.99403
9c94712b0ac128883aeed3cf0cd696c7	6d17ed796a25ea35dc19e67c30960976	0.99403
c0086f50c449526558dcbb7fd569043f	b34fb0904caa8c1db6df0f5cb24da6b2	0.99403
c0086f50c449526558dcbb7fd569043f	47591358addd7be611d87aa5fb1d0501	0.99403
c0086f50c449526558dcbb7fd569043f	c1b64e9ee44cded7174eb92430f7ac95	0.99403
c0086f50c449526558dcbb7fd569043f	d9db432ac0d299dffcadd359c0e7120b	0.99403
c0086f50c449526558dcbb7fd569043f	a446207351cbb3a918183507652fbb97	0.99403
c0086f50c449526558dcbb7fd569043f	4cdf9aeb68a51fc2fff2f82e2e682c5b	0.99403
c0086f50c449526558dcbb7fd569043f	4975e9498ed5c0822a2f200287a6c612	0.99403
c0086f50c449526558dcbb7fd569043f	55ba03929d537e43f91aa98c36421f34	0.99403
b304e39a3a19e64aca096f29b6360682	0abe519a9a8a45aa86cceaf9f3c33f05	0.99403
3b3bbab9ab17d53dd61ce47bd1aef746	4626abe1b3958f24002d1d38b7e8ac91	0.99403
441b997bec002a7fe05e0ad7e4bfc14e	64bcf94b568e9cbaa0404d841ad75435	0.99403
441b997bec002a7fe05e0ad7e4bfc14e	22a7879edff5dac58a2323ea2f5f00cf	0.99403
441b997bec002a7fe05e0ad7e4bfc14e	a3ce2b76a5b2daccdcc5c58ee218896a	0.99403
092eca9cd442d861a0923e8ff485bfe1	6f2548da34731900e68ee1bbeed4a579	0.99403
092eca9cd442d861a0923e8ff485bfe1	c22273f574a6358a8544884020f7a822	0.99403
092eca9cd442d861a0923e8ff485bfe1	c1b64e9ee44cded7174eb92430f7ac95	0.99403
092eca9cd442d861a0923e8ff485bfe1	679dbf70f65f5ada0f1716630019651d	0.99403
092eca9cd442d861a0923e8ff485bfe1	d9db432ac0d299dffcadd359c0e7120b	0.99403
092eca9cd442d861a0923e8ff485bfe1	cd98632699c5f92b428dd2337fc27563	0.99403
092eca9cd442d861a0923e8ff485bfe1	4ec07abdb860bda723972447dfa55ddc	0.99403
092eca9cd442d861a0923e8ff485bfe1	675f47f52ab28cdcf30e23836997082e	0.99403
092eca9cd442d861a0923e8ff485bfe1	9fc85a26ba4e62372a0510e76a6e616b	0.99403
092eca9cd442d861a0923e8ff485bfe1	55ba03929d537e43f91aa98c36421f34	0.99403
8080b535f4bf339a8d5fee285ddab60b	bce23b9b289bb43bff25cd148f080557	0.99403
8080b535f4bf339a8d5fee285ddab60b	8bd33e664b9a859086f52c1737c36339	0.99403
8080b535f4bf339a8d5fee285ddab60b	afede6d9aa8210bc3d25c9253a7a4f84	0.99403
8080b535f4bf339a8d5fee285ddab60b	fcb732848a3d018dde12adafdf5fa5f9	0.99403
8080b535f4bf339a8d5fee285ddab60b	9e8523807c59f3603834a25cbcd86494	0.99403
8080b535f4bf339a8d5fee285ddab60b	3f1304fc1b0de80cad541bdcff9676a5	0.99403
65d24cb700a481a668a269cc4d4c0258	94e10c92d744617d9880b78eef11a2c6	0.99403
65d24cb700a481a668a269cc4d4c0258	5d0fee9c66e12c632ee634131979c10c	0.99403
6916d97494489296801671b8d18a0309	b42fc99cbb9150042fb31318bd88b12c	0.99403
6916d97494489296801671b8d18a0309	2652f19ead90e82ed89bbfd4143f6b0c	0.99403
6916d97494489296801671b8d18a0309	0b04a06598d5b5b3f758c73cb8792ab9	0.99403
6916d97494489296801671b8d18a0309	3a9208d106ad373e9d8528bbe6b9c5ad	0.99403
6916d97494489296801671b8d18a0309	023ec9fb40715844e7a702c82c060480	0.99403
422efbd87a37e2b1e7b7fa621cc99374	c6911e1ac67555f4a10f39df29c35a82	0.99403
422efbd87a37e2b1e7b7fa621cc99374	90a3648550c58dac0d8a380eeeb8cf17	0.99403
422efbd87a37e2b1e7b7fa621cc99374	9d510a1ee7233ab15bca064515917a04	0.99403
422efbd87a37e2b1e7b7fa621cc99374	9b35d30a98d76cf13631eb86a5213d14	0.99403
422efbd87a37e2b1e7b7fa621cc99374	96a9773aa46a3d58007f76fad394d5f4	0.99403
422efbd87a37e2b1e7b7fa621cc99374	8c357abf174733947c627dde698d3f93	0.99403
05ee809c46ccca3097f50d1123609e5a	9b1e92389ef0cc5317353e8ea8426a70	0.99403
b34fb0904caa8c1db6df0f5cb24da6b2	a446207351cbb3a918183507652fbb97	0.99403
b34fb0904caa8c1db6df0f5cb24da6b2	4975e9498ed5c0822a2f200287a6c612	0.99403
94e10c92d744617d9880b78eef11a2c6	4edec3e2a4504a62bdc1387a9f7bcc26	0.99403
94e10c92d744617d9880b78eef11a2c6	7ee887337d29a3cd41f4648bbd1ef6ba	0.99403
6f2548da34731900e68ee1bbeed4a579	c22273f574a6358a8544884020f7a822	0.99403
6f2548da34731900e68ee1bbeed4a579	c1b64e9ee44cded7174eb92430f7ac95	0.99403
6f2548da34731900e68ee1bbeed4a579	679dbf70f65f5ada0f1716630019651d	0.99403
6f2548da34731900e68ee1bbeed4a579	d9db432ac0d299dffcadd359c0e7120b	0.99403
6f2548da34731900e68ee1bbeed4a579	cd98632699c5f92b428dd2337fc27563	0.99403
6f2548da34731900e68ee1bbeed4a579	4ec07abdb860bda723972447dfa55ddc	0.99403
6f2548da34731900e68ee1bbeed4a579	675f47f52ab28cdcf30e23836997082e	0.99403
6f2548da34731900e68ee1bbeed4a579	9fc85a26ba4e62372a0510e76a6e616b	0.99403
6f2548da34731900e68ee1bbeed4a579	55ba03929d537e43f91aa98c36421f34	0.99403
c6911e1ac67555f4a10f39df29c35a82	9d510a1ee7233ab15bca064515917a04	0.99403
c6911e1ac67555f4a10f39df29c35a82	9b35d30a98d76cf13631eb86a5213d14	0.99403
1ee948b5ef1c4af93bce919fe1350f59	741de23dfdfb60ee191b1bf3fb3e60e7	0.99403
1ee948b5ef1c4af93bce919fe1350f59	a018dfb928f901a2fbc3ee62c0e7362b	0.99403
c22273f574a6358a8544884020f7a822	59702671fe9c6d0fafd8225d1f68bd1f	0.99403
c22273f574a6358a8544884020f7a822	679dbf70f65f5ada0f1716630019651d	0.99403
c22273f574a6358a8544884020f7a822	cd98632699c5f92b428dd2337fc27563	0.99403
0f6006dc9edddee73c4e03a918c3aa66	fa493aa4f1faf6be9820d19f83cdd969	0.99403
0f6006dc9edddee73c4e03a918c3aa66	759ac655001806785218ecfb18b06a1d	0.99403
0f6006dc9edddee73c4e03a918c3aa66	b092f7f3425cc2dfc9965117ab63717d	0.99403
0f6006dc9edddee73c4e03a918c3aa66	20dd251ae02aea592d801d239b63f9e4	0.99403
c3b62664bd1a4c55ed9dcd8c92b33583	5f042513c67fdd55888051594cb486ac	0.99403
59702671fe9c6d0fafd8225d1f68bd1f	cd98632699c5f92b428dd2337fc27563	0.99403
59702671fe9c6d0fafd8225d1f68bd1f	ccedbacba71f5225e8911acbd4552b5d	0.99403
82c9e178eb04788207c4d1da199ee71b	22a7879edff5dac58a2323ea2f5f00cf	0.99403
f6608e71c06674d8840e9cb8ccb2e74d	f2816e09b5444945d9cb7c5c801d427d	0.99403
f6608e71c06674d8840e9cb8ccb2e74d	e543abb5f12c23a50072118b9454f001	0.99403
f6264c5aaa7a9b9105a0ec0f9d26c608	51262c0e7e875ebe8e03cf077ac177c5	0.99403
0abe519a9a8a45aa86cceaf9f3c33f05	3fc31391229b05e4b66e7950f1548840	0.99403
06c4da6859980f19124f84f1a07cf264	1659d7acb4a55ff27e3cbfc218639b9c	0.99403
416c2d057afa011278e4072aa985db0a	b06d1f86a1336811966c0e55dafe5152	0.99403
c8d1e36cf0bc1f33faf48ef2b3a2cf41	4f33f9170e3d2e17aa38281ce119a0d2	0.99403
47591358addd7be611d87aa5fb1d0501	a446207351cbb3a918183507652fbb97	0.99403
0915263f5f4c5ca4e656773ecaeddd7a	93c1449aef105c81ee44691574a04fa6	0.99403
0915263f5f4c5ca4e656773ecaeddd7a	4ec07abdb860bda723972447dfa55ddc	0.99403
6dd57d68807306a85a30f15e758134d4	bec4470cfa6ca2e983d8d2d13fac0ea8	0.99403
bce23b9b289bb43bff25cd148f080557	afede6d9aa8210bc3d25c9253a7a4f84	0.99403
bce23b9b289bb43bff25cd148f080557	3f1304fc1b0de80cad541bdcff9676a5	0.99403
c1b64e9ee44cded7174eb92430f7ac95	679dbf70f65f5ada0f1716630019651d	0.99403
c1b64e9ee44cded7174eb92430f7ac95	d9db432ac0d299dffcadd359c0e7120b	0.99403
c1b64e9ee44cded7174eb92430f7ac95	a446207351cbb3a918183507652fbb97	0.99403
c1b64e9ee44cded7174eb92430f7ac95	4cdf9aeb68a51fc2fff2f82e2e682c5b	0.99403
c1b64e9ee44cded7174eb92430f7ac95	4975e9498ed5c0822a2f200287a6c612	0.99403
c1b64e9ee44cded7174eb92430f7ac95	55ba03929d537e43f91aa98c36421f34	0.99403
58b68525f7a335fdba75a3ce75720e07	49c1ac3db0834e9040ad888443339e6f	0.99403
679dbf70f65f5ada0f1716630019651d	d9db432ac0d299dffcadd359c0e7120b	0.99403
679dbf70f65f5ada0f1716630019651d	cd98632699c5f92b428dd2337fc27563	0.99403
679dbf70f65f5ada0f1716630019651d	4ec07abdb860bda723972447dfa55ddc	0.99403
679dbf70f65f5ada0f1716630019651d	675f47f52ab28cdcf30e23836997082e	0.99403
679dbf70f65f5ada0f1716630019651d	9fc85a26ba4e62372a0510e76a6e616b	0.99403
679dbf70f65f5ada0f1716630019651d	55ba03929d537e43f91aa98c36421f34	0.99403
64bcf94b568e9cbaa0404d841ad75435	696fcd39d96eaa84510ddbb3e00d8263	0.99403
64bcf94b568e9cbaa0404d841ad75435	a3ce2b76a5b2daccdcc5c58ee218896a	0.99403
696fcd39d96eaa84510ddbb3e00d8263	79b7674106bc3fb9eccf73c5bd64bfb5	0.99403
696fcd39d96eaa84510ddbb3e00d8263	aa13b33f5e1937ef92b901d75f190fbe	0.99403
696fcd39d96eaa84510ddbb3e00d8263	6d17ed796a25ea35dc19e67c30960976	0.99403
5f042513c67fdd55888051594cb486ac	878ac7527f7fdf86178eaa89ab6398fe	0.99403
8bd33e664b9a859086f52c1737c36339	3437f453277efee108b6338b65ec716d	0.99403
8bd33e664b9a859086f52c1737c36339	f20ee43e33f1279fad16f974401722fe	0.99403
22a7879edff5dac58a2323ea2f5f00cf	4cdf9aeb68a51fc2fff2f82e2e682c5b	0.99403
fa493aa4f1faf6be9820d19f83cdd969	759ac655001806785218ecfb18b06a1d	0.99403
fa493aa4f1faf6be9820d19f83cdd969	b092f7f3425cc2dfc9965117ab63717d	0.99403
fa493aa4f1faf6be9820d19f83cdd969	20dd251ae02aea592d801d239b63f9e4	0.99403
db479043d01c7c0f52d725110a613bdc	3a9208d106ad373e9d8528bbe6b9c5ad	0.99403
90a3648550c58dac0d8a380eeeb8cf17	9d510a1ee7233ab15bca064515917a04	0.99403
90a3648550c58dac0d8a380eeeb8cf17	9b35d30a98d76cf13631eb86a5213d14	0.99403
90a3648550c58dac0d8a380eeeb8cf17	96a9773aa46a3d58007f76fad394d5f4	0.99403
90a3648550c58dac0d8a380eeeb8cf17	8c357abf174733947c627dde698d3f93	0.99403
0315be37f6165f1e87335603ad7d63e9	bc61c16683aa91f4a47a2266993a69d1	0.99403
ad21821d85b6e1907c8a16adaa3c10ff	1567b4dacafc28391f53de9efb63c5b9	0.99403
b100c6f62ce1fa1c32a8d86bf1166780	e34b34995e0f45e58c99616d7abe9ef8	0.99403
3437f453277efee108b6338b65ec716d	f20ee43e33f1279fad16f974401722fe	0.99403
759ac655001806785218ecfb18b06a1d	b092f7f3425cc2dfc9965117ab63717d	0.99403
759ac655001806785218ecfb18b06a1d	20dd251ae02aea592d801d239b63f9e4	0.99403
51262c0e7e875ebe8e03cf077ac177c5	96a9773aa46a3d58007f76fad394d5f4	0.99403
cf128de805981908ffc28e6be7a5f7e8	0467b796cedda0e417b7e95a797eb8fd	0.99403
cf128de805981908ffc28e6be7a5f7e8	bfc979fbc3bc5a4801c52c99b2891336	0.99403
8c68c8f1ca3ceb58bd95ff2e2f7444af	79b7674106bc3fb9eccf73c5bd64bfb5	0.99403
8c68c8f1ca3ceb58bd95ff2e2f7444af	aa13b33f5e1937ef92b901d75f190fbe	0.99403
8c68c8f1ca3ceb58bd95ff2e2f7444af	69916a1cde832bb15ac5acc0ef5e3518	0.99403
8c68c8f1ca3ceb58bd95ff2e2f7444af	6d17ed796a25ea35dc19e67c30960976	0.99403
d9db432ac0d299dffcadd359c0e7120b	cd98632699c5f92b428dd2337fc27563	0.99403
d9db432ac0d299dffcadd359c0e7120b	a446207351cbb3a918183507652fbb97	0.99403
d9db432ac0d299dffcadd359c0e7120b	4ec07abdb860bda723972447dfa55ddc	0.99403
d9db432ac0d299dffcadd359c0e7120b	675f47f52ab28cdcf30e23836997082e	0.99403
d9db432ac0d299dffcadd359c0e7120b	9fc85a26ba4e62372a0510e76a6e616b	0.99403
d9db432ac0d299dffcadd359c0e7120b	55ba03929d537e43f91aa98c36421f34	0.99403
4edec3e2a4504a62bdc1387a9f7bcc26	7ee887337d29a3cd41f4648bbd1ef6ba	0.99403
a446207351cbb3a918183507652fbb97	4cdf9aeb68a51fc2fff2f82e2e682c5b	0.99403
a446207351cbb3a918183507652fbb97	4975e9498ed5c0822a2f200287a6c612	0.99403
a446207351cbb3a918183507652fbb97	55ba03929d537e43f91aa98c36421f34	0.99403
afede6d9aa8210bc3d25c9253a7a4f84	3f1304fc1b0de80cad541bdcff9676a5	0.99403
9d510a1ee7233ab15bca064515917a04	9b35d30a98d76cf13631eb86a5213d14	0.99403
9d510a1ee7233ab15bca064515917a04	96a9773aa46a3d58007f76fad394d5f4	0.99403
9d510a1ee7233ab15bca064515917a04	8c357abf174733947c627dde698d3f93	0.99403
1567b4dacafc28391f53de9efb63c5b9	69916a1cde832bb15ac5acc0ef5e3518	0.99403
1567b4dacafc28391f53de9efb63c5b9	db15ab9a45047795ca19c70acb4bee26	0.99403
34b68b1ef916cbbfcf7e587bb154452d	023ec9fb40715844e7a702c82c060480	0.99403
b42fc99cbb9150042fb31318bd88b12c	2652f19ead90e82ed89bbfd4143f6b0c	0.99403
b42fc99cbb9150042fb31318bd88b12c	0b04a06598d5b5b3f758c73cb8792ab9	0.99403
b42fc99cbb9150042fb31318bd88b12c	3a9208d106ad373e9d8528bbe6b9c5ad	0.99403
fcb732848a3d018dde12adafdf5fa5f9	522f072a3e8ca88b8f8bdecea04465d9	0.99403
54a218d7e25df00236bb0e2ec1c02b79	7a45e5e45d7fa0edc47f2289b8334a4e	0.99403
b092f7f3425cc2dfc9965117ab63717d	20dd251ae02aea592d801d239b63f9e4	0.99403
96c5f928b96ff41ecf26e1e13259fa64	519d9f87c7b9684dab0bac9e872e50bb	0.99403
96c5f928b96ff41ecf26e1e13259fa64	39e70d892a1b487e00ae81b7b70491af	0.99403
a018dfb928f901a2fbc3ee62c0e7362b	2652f19ead90e82ed89bbfd4143f6b0c	0.99403
9e8523807c59f3603834a25cbcd86494	3f1304fc1b0de80cad541bdcff9676a5	0.99403
79b7674106bc3fb9eccf73c5bd64bfb5	aa13b33f5e1937ef92b901d75f190fbe	0.99403
79b7674106bc3fb9eccf73c5bd64bfb5	69916a1cde832bb15ac5acc0ef5e3518	0.99403
79b7674106bc3fb9eccf73c5bd64bfb5	6d17ed796a25ea35dc19e67c30960976	0.99403
aa13b33f5e1937ef92b901d75f190fbe	6d17ed796a25ea35dc19e67c30960976	0.99403
675f47f52ab28cdcf30e23836997082e	9fc85a26ba4e62372a0510e76a6e616b	0.99403
675f47f52ab28cdcf30e23836997082e	55ba03929d537e43f91aa98c36421f34	0.99403
bd1c32eeb94c9964c973502a0e10120f	e543abb5f12c23a50072118b9454f001	0.99403
69916a1cde832bb15ac5acc0ef5e3518	db15ab9a45047795ca19c70acb4bee26	0.99403
69916a1cde832bb15ac5acc0ef5e3518	6d17ed796a25ea35dc19e67c30960976	0.99403
2718b99c6ba1460433b7a3bc3c2e35a6	bdd4edd596569762f1a417458449dde9	0.99403
519d9f87c7b9684dab0bac9e872e50bb	39e70d892a1b487e00ae81b7b70491af	0.99403
63bf8d81940fc455b5cc541cc7a660bb	a824b066eb0b77c728cfab213da2e002	0.99403
63bf8d81940fc455b5cc541cc7a660bb	878ac7527f7fdf86178eaa89ab6398fe	0.99403
63bf8d81940fc455b5cc541cc7a660bb	70c3da9a368397a37246d8dcdf38f4cb	0.99403
fcaeef384902686a3bb1a45b9fd73d3c	0467b796cedda0e417b7e95a797eb8fd	0.99403
19b0fb1765b3e69797548d682c6cc9e5	bec4470cfa6ca2e983d8d2d13fac0ea8	0.99403
a824b066eb0b77c728cfab213da2e002	878ac7527f7fdf86178eaa89ab6398fe	0.99403
a824b066eb0b77c728cfab213da2e002	70c3da9a368397a37246d8dcdf38f4cb	0.99403
f2816e09b5444945d9cb7c5c801d427d	e543abb5f12c23a50072118b9454f001	0.99403
0b04a06598d5b5b3f758c73cb8792ab9	023ec9fb40715844e7a702c82c060480	0.99403
878ac7527f7fdf86178eaa89ab6398fe	70c3da9a368397a37246d8dcdf38f4cb	0.99403
9b35d30a98d76cf13631eb86a5213d14	96a9773aa46a3d58007f76fad394d5f4	0.99403
9b35d30a98d76cf13631eb86a5213d14	8c357abf174733947c627dde698d3f93	0.99403
4975e9498ed5c0822a2f200287a6c612	55ba03929d537e43f91aa98c36421f34	0.99403
96a9773aa46a3d58007f76fad394d5f4	8c357abf174733947c627dde698d3f93	0.99403
0467b796cedda0e417b7e95a797eb8fd	bfc979fbc3bc5a4801c52c99b2891336	0.99403
Kbrevis	5249b2f97c8d63c67a14cb2444d6e6b0	0.94566
Kbrevis	a18f563b60ef31afe1d5aaf0b4331f3d	0.94566
Kbrevis	b800ef37e180548cc94019d2c15a2d8d	0.94566
Kbrevis	8e0853ccd09522a3a8c2742a374fab62	0.94566
Kbrevis	eda6f9881bff8aea35a15d26cc534efd	0.94566
Kbrevis	0166ac0863837f3e87a4a75afd9e7ddf	0.94566
Kbrevis	05ee809c46ccca3097f50d1123609e5a	0.94566
Kbrevis	9b1e92389ef0cc5317353e8ea8426a70	0.94566
Kbrevis	aff65597908099c9ee322aff6bec0a68	0.94566
Kbrevis	c2146a3af5097133d4583f03c3a6b4a5	0.94566
56dfd9d7e24de5f67e68506768209dca	932c94ef9ab7cd5dbb25803383b81a78	0.94566
56dfd9d7e24de5f67e68506768209dca	cb580583ea3fdb75c58a573e23f3b42e	0.94566
56dfd9d7e24de5f67e68506768209dca	f442143468f99eaa62a01a7bdf325409	0.94566
56dfd9d7e24de5f67e68506768209dca	f1fec4dfaa2202d002a437cc4a248e66	0.94566
56dfd9d7e24de5f67e68506768209dca	6914f32d9ee2679f7f74b6d5f8f1e9e7	0.94566
56dfd9d7e24de5f67e68506768209dca	a9fe2fa970bc4b6487df11daf151ee81	0.94566
56dfd9d7e24de5f67e68506768209dca	93b2cb19723f915a805a4cd20f594f07	0.94566
56dfd9d7e24de5f67e68506768209dca	eda6f9881bff8aea35a15d26cc534efd	0.94566
56dfd9d7e24de5f67e68506768209dca	22f26cc2c7277df74d59aa1f5adb05e4	0.94566
56dfd9d7e24de5f67e68506768209dca	cefbbaabbe2748b243095e71e7b86265	0.94566
56dfd9d7e24de5f67e68506768209dca	801463e61abcfcc2938e84e16c3929d6	0.94566
56dfd9d7e24de5f67e68506768209dca	bf7c8b35b60d08c0bf62fc2894b0a543	0.94566
56dfd9d7e24de5f67e68506768209dca	e4db4b69f4dcb92e21a950f284ec8b75	0.94566
56dfd9d7e24de5f67e68506768209dca	a1219c3e384b263c96f09ff1f1cea107	0.94566
56dfd9d7e24de5f67e68506768209dca	bdb19eb6ef13bfed15a7ebb821a6d403	0.94566
56dfd9d7e24de5f67e68506768209dca	9d510a1ee7233ab15bca064515917a04	0.94566
56dfd9d7e24de5f67e68506768209dca	15e3be12e07b72a573253f48a59b633d	0.94566
750cbe165ed5ca17e2d5d11c38183467	3581406d8e0d96b468d400cf9c49c8a1	0.94566
750cbe165ed5ca17e2d5d11c38183467	2b35508b4e319298a088c9a20f5cf1b1	0.94566
750cbe165ed5ca17e2d5d11c38183467	eb7ad7504f3a8f3dfa3361a19fc14984	0.94566
88f9ec475057a64bf4002030270aea28	a90e3b691738b7aa64868ab8d00bea6d	0.94566
88f9ec475057a64bf4002030270aea28	bf4864246283a3df9d2d93cd25ea6c74	0.94566
88f9ec475057a64bf4002030270aea28	1e3a2aad4f8f247c7245ee7836ba20bd	0.94566
88f9ec475057a64bf4002030270aea28	93b2cb19723f915a805a4cd20f594f07	0.94566
88f9ec475057a64bf4002030270aea28	f77e657f16617d6eefe6c409ead568e8	0.94566
88f9ec475057a64bf4002030270aea28	94e10c92d744617d9880b78eef11a2c6	0.94566
88f9ec475057a64bf4002030270aea28	7fd5a794906d83f5fc04700094b52f38	0.94566
88f9ec475057a64bf4002030270aea28	b70898de946a803c963584e6b7b27bea	0.94566
88f9ec475057a64bf4002030270aea28	51262c0e7e875ebe8e03cf077ac177c5	0.94566
88f9ec475057a64bf4002030270aea28	f5894077625c801e89b4365be5964095	0.94566
88f9ec475057a64bf4002030270aea28	4ec07abdb860bda723972447dfa55ddc	0.94566
88f9ec475057a64bf4002030270aea28	ccedbacba71f5225e8911acbd4552b5d	0.94566
88f9ec475057a64bf4002030270aea28	3fc31391229b05e4b66e7950f1548840	0.94566
88f9ec475057a64bf4002030270aea28	9fc85a26ba4e62372a0510e76a6e616b	0.94566
88f9ec475057a64bf4002030270aea28	6b8146cb68c2d5021bd95561bfc0e7ee	0.94566
88f9ec475057a64bf4002030270aea28	1b6b519d3d862ee5aa5f5fb031cbedd7	0.94566
88f9ec475057a64bf4002030270aea28	65cfe8b097fd708eaba653545f8f8e69	0.94566
88f9ec475057a64bf4002030270aea28	8c357abf174733947c627dde698d3f93	0.94566
8b17dc24e50d2dc95225eab2c1a87f23	2718b99c6ba1460433b7a3bc3c2e35a6	0.94566
f1dd1bbb2b0ce8bcad3ed39593851859	8c2a1eaecbc549497c8b1debe067b2fa	0.94566
5249b2f97c8d63c67a14cb2444d6e6b0	aff65597908099c9ee322aff6bec0a68	0.94566
5249b2f97c8d63c67a14cb2444d6e6b0	c2146a3af5097133d4583f03c3a6b4a5	0.94566
a3a39c55a5ca46d938e682cd55dabcf0	827e158b58edb9143492782dd442a065	0.94566
a3a39c55a5ca46d938e682cd55dabcf0	36c542375a8bbe47f1ac5c1dc0d0fed3	0.94566
a3a39c55a5ca46d938e682cd55dabcf0	a05ba1ba10f7ad7834d8ae32490b920c	0.94566
a3a39c55a5ca46d938e682cd55dabcf0	c5110bc820a22854866d6b5ee21344c2	0.94566
a3a39c55a5ca46d938e682cd55dabcf0	c3b7bf0e9723ee25d30372e02f56677d	0.94566
a3a39c55a5ca46d938e682cd55dabcf0	82e4b4a214f2418f9f684f6e28464431	0.94566
a3a39c55a5ca46d938e682cd55dabcf0	16bf085946684ed5fe695352fdaa04bd	0.94566
a3a39c55a5ca46d938e682cd55dabcf0	05734150853338b5e489721794a7c826	0.94566
a3a39c55a5ca46d938e682cd55dabcf0	60da738bc4b046c5c5c7b22f77832a90	0.94566
a3a39c55a5ca46d938e682cd55dabcf0	441b997bec002a7fe05e0ad7e4bfc14e	0.94566
a3a39c55a5ca46d938e682cd55dabcf0	da17572657f5636c66a5ce8c2d04922f	0.94566
a3a39c55a5ca46d938e682cd55dabcf0	b34fb0904caa8c1db6df0f5cb24da6b2	0.94566
a3a39c55a5ca46d938e682cd55dabcf0	bce23b9b289bb43bff25cd148f080557	0.94566
a3a39c55a5ca46d938e682cd55dabcf0	64bcf94b568e9cbaa0404d841ad75435	0.94566
a3a39c55a5ca46d938e682cd55dabcf0	696fcd39d96eaa84510ddbb3e00d8263	0.94566
a3a39c55a5ca46d938e682cd55dabcf0	8bd33e664b9a859086f52c1737c36339	0.94566
a3a39c55a5ca46d938e682cd55dabcf0	68b6f352877ccbaddbc5ebbdcd2c87a4	0.94566
a3a39c55a5ca46d938e682cd55dabcf0	5d0fee9c66e12c632ee634131979c10c	0.94566
a3a39c55a5ca46d938e682cd55dabcf0	337145739bb153cea3d3c53595acbf22	0.94566
a3a39c55a5ca46d938e682cd55dabcf0	0f407bb44ce651722dc620d0f9490b63	0.94566
a3a39c55a5ca46d938e682cd55dabcf0	afede6d9aa8210bc3d25c9253a7a4f84	0.94566
a3a39c55a5ca46d938e682cd55dabcf0	4cdf9aeb68a51fc2fff2f82e2e682c5b	0.94566
a3a39c55a5ca46d938e682cd55dabcf0	79b7674106bc3fb9eccf73c5bd64bfb5	0.94566
a3a39c55a5ca46d938e682cd55dabcf0	a3ce2b76a5b2daccdcc5c58ee218896a	0.94566
a3a39c55a5ca46d938e682cd55dabcf0	aa13b33f5e1937ef92b901d75f190fbe	0.94566
a3a39c55a5ca46d938e682cd55dabcf0	3f1304fc1b0de80cad541bdcff9676a5	0.94566
a3a39c55a5ca46d938e682cd55dabcf0	6b8146cb68c2d5021bd95561bfc0e7ee	0.94566
a3a39c55a5ca46d938e682cd55dabcf0	4975e9498ed5c0822a2f200287a6c612	0.94566
a3a39c55a5ca46d938e682cd55dabcf0	6d17ed796a25ea35dc19e67c30960976	0.94566
a3a39c55a5ca46d938e682cd55dabcf0	20dd251ae02aea592d801d239b63f9e4	0.94566
a3a39c55a5ca46d938e682cd55dabcf0	55ba03929d537e43f91aa98c36421f34	0.94566
4521bebdc60951cdc36981d163233185	19e9d62d5004a2940cf444e3390c37ff	0.94566
ca0ef16ea772060cc0bcc54428f9c1d3	306efcbd2c4bfb204f5edc78a3770079	0.94566
ca0ef16ea772060cc0bcc54428f9c1d3	16bf085946684ed5fe695352fdaa04bd	0.94566
827e158b58edb9143492782dd442a065	c3b7bf0e9723ee25d30372e02f56677d	0.94566
827e158b58edb9143492782dd442a065	16bf085946684ed5fe695352fdaa04bd	0.94566
827e158b58edb9143492782dd442a065	bce23b9b289bb43bff25cd148f080557	0.94566
827e158b58edb9143492782dd442a065	68b6f352877ccbaddbc5ebbdcd2c87a4	0.94566
827e158b58edb9143492782dd442a065	f97c644b06dc37cb599522bdbebb00ce	0.94566
827e158b58edb9143492782dd442a065	afede6d9aa8210bc3d25c9253a7a4f84	0.94566
827e158b58edb9143492782dd442a065	522f072a3e8ca88b8f8bdecea04465d9	0.94566
827e158b58edb9143492782dd442a065	3f1304fc1b0de80cad541bdcff9676a5	0.94566
0d5e635df614a9c9a7b42ca3500c0d3c	6aa1d95a0d4764b83e0925b3122274ed	0.94566
0d5e635df614a9c9a7b42ca3500c0d3c	7ba3d25c1364399fcd59076c4d90732b	0.94566
0d5e635df614a9c9a7b42ca3500c0d3c	66c5253c6d7fc739b2d882966842f805	0.94566
0d5e635df614a9c9a7b42ca3500c0d3c	c6eecb8a5f4550768cfd4d4a4723c636	0.94566
0d5e635df614a9c9a7b42ca3500c0d3c	d239e96a3f1ad1ebf4ed9aee42656456	0.94566
0d5e635df614a9c9a7b42ca3500c0d3c	3b3bbab9ab17d53dd61ce47bd1aef746	0.94566
0d5e635df614a9c9a7b42ca3500c0d3c	df5a861dbf82d100812defe4b06ce542	0.94566
36c542375a8bbe47f1ac5c1dc0d0fed3	ee127d2b4880fc0a1f416d3c6907bfea	0.94566
36c542375a8bbe47f1ac5c1dc0d0fed3	a05ba1ba10f7ad7834d8ae32490b920c	0.94566
36c542375a8bbe47f1ac5c1dc0d0fed3	c5110bc820a22854866d6b5ee21344c2	0.94566
36c542375a8bbe47f1ac5c1dc0d0fed3	82e4b4a214f2418f9f684f6e28464431	0.94566
36c542375a8bbe47f1ac5c1dc0d0fed3	67f59db4c23e06a8484ab88a3e520323	0.94566
36c542375a8bbe47f1ac5c1dc0d0fed3	5610f9fd4d05131f3274383ca5be7ed2	0.94566
36c542375a8bbe47f1ac5c1dc0d0fed3	1040ffc55a036894e9ec2cbe47802e07	0.94566
36c542375a8bbe47f1ac5c1dc0d0fed3	7c762c36ae20866e1998a696f50f9716	0.94566
36c542375a8bbe47f1ac5c1dc0d0fed3	f1bb935fa8a308892ff011e7813dfc5c	0.94566
36c542375a8bbe47f1ac5c1dc0d0fed3	14525301bb4271314d10e75fe308a602	0.94566
36c542375a8bbe47f1ac5c1dc0d0fed3	05734150853338b5e489721794a7c826	0.94566
36c542375a8bbe47f1ac5c1dc0d0fed3	60da738bc4b046c5c5c7b22f77832a90	0.94566
36c542375a8bbe47f1ac5c1dc0d0fed3	441b997bec002a7fe05e0ad7e4bfc14e	0.94566
36c542375a8bbe47f1ac5c1dc0d0fed3	da17572657f5636c66a5ce8c2d04922f	0.94566
36c542375a8bbe47f1ac5c1dc0d0fed3	0915263f5f4c5ca4e656773ecaeddd7a	0.94566
36c542375a8bbe47f1ac5c1dc0d0fed3	64bcf94b568e9cbaa0404d841ad75435	0.94566
36c542375a8bbe47f1ac5c1dc0d0fed3	696fcd39d96eaa84510ddbb3e00d8263	0.94566
36c542375a8bbe47f1ac5c1dc0d0fed3	8bd33e664b9a859086f52c1737c36339	0.94566
36c542375a8bbe47f1ac5c1dc0d0fed3	0315be37f6165f1e87335603ad7d63e9	0.94566
36c542375a8bbe47f1ac5c1dc0d0fed3	5d0fee9c66e12c632ee634131979c10c	0.94566
36c542375a8bbe47f1ac5c1dc0d0fed3	337145739bb153cea3d3c53595acbf22	0.94566
36c542375a8bbe47f1ac5c1dc0d0fed3	0f407bb44ce651722dc620d0f9490b63	0.94566
36c542375a8bbe47f1ac5c1dc0d0fed3	3437f453277efee108b6338b65ec716d	0.94566
36c542375a8bbe47f1ac5c1dc0d0fed3	cd98632699c5f92b428dd2337fc27563	0.94566
36c542375a8bbe47f1ac5c1dc0d0fed3	afede6d9aa8210bc3d25c9253a7a4f84	0.94566
36c542375a8bbe47f1ac5c1dc0d0fed3	79b7674106bc3fb9eccf73c5bd64bfb5	0.94566
36c542375a8bbe47f1ac5c1dc0d0fed3	a3ce2b76a5b2daccdcc5c58ee218896a	0.94566
36c542375a8bbe47f1ac5c1dc0d0fed3	aa13b33f5e1937ef92b901d75f190fbe	0.94566
36c542375a8bbe47f1ac5c1dc0d0fed3	c57eee14afd7a19174edd5b241350a02	0.94566
36c542375a8bbe47f1ac5c1dc0d0fed3	6b8146cb68c2d5021bd95561bfc0e7ee	0.94566
36c542375a8bbe47f1ac5c1dc0d0fed3	6d17ed796a25ea35dc19e67c30960976	0.94566
36c542375a8bbe47f1ac5c1dc0d0fed3	56f9c987896664bf30b7df45f17c2c30	0.94566
36c542375a8bbe47f1ac5c1dc0d0fed3	20dd251ae02aea592d801d239b63f9e4	0.94566
b9d507fdd120f6930cb77be2a8f6b68d	8784c48f2e25f83675c16a766ef0a315	0.94566
3581406d8e0d96b468d400cf9c49c8a1	2b35508b4e319298a088c9a20f5cf1b1	0.94566
3581406d8e0d96b468d400cf9c49c8a1	eb7ad7504f3a8f3dfa3361a19fc14984	0.94566
3581406d8e0d96b468d400cf9c49c8a1	522f072a3e8ca88b8f8bdecea04465d9	0.94566
2b35508b4e319298a088c9a20f5cf1b1	61ab824b63756fa52f4adc38774d9cfd	0.94566
ee127d2b4880fc0a1f416d3c6907bfea	67f59db4c23e06a8484ab88a3e520323	0.94566
ee127d2b4880fc0a1f416d3c6907bfea	f1bb935fa8a308892ff011e7813dfc5c	0.94566
ee127d2b4880fc0a1f416d3c6907bfea	14525301bb4271314d10e75fe308a602	0.94566
ee127d2b4880fc0a1f416d3c6907bfea	3437f453277efee108b6338b65ec716d	0.94566
ee127d2b4880fc0a1f416d3c6907bfea	cd98632699c5f92b428dd2337fc27563	0.94566
ee127d2b4880fc0a1f416d3c6907bfea	c57eee14afd7a19174edd5b241350a02	0.94566
ee127d2b4880fc0a1f416d3c6907bfea	56f9c987896664bf30b7df45f17c2c30	0.94566
a34cbe9b30498b9c31eb71cea0584b56	7f02f8891c18a78c1ca3b37b4aa5ee79	0.94566
ad310229cc4b6c354d351fa861d81d49	781658c5e0d0781fec4d34bd04d50fac	0.94566
6bb3cfdda2d01ec3bae2be8e68c469e4	2718b99c6ba1460433b7a3bc3c2e35a6	0.94566
a90e3b691738b7aa64868ab8d00bea6d	c4b95a9b5ca76755b59ccd86ae6deba0	0.94566
a90e3b691738b7aa64868ab8d00bea6d	bf4864246283a3df9d2d93cd25ea6c74	0.94566
a90e3b691738b7aa64868ab8d00bea6d	69a038a32cdce0e9c59aa15868003dc0	0.94566
a90e3b691738b7aa64868ab8d00bea6d	1e3a2aad4f8f247c7245ee7836ba20bd	0.94566
a90e3b691738b7aa64868ab8d00bea6d	8f9f1aae9646df33f47a6cf3fe8e9739	0.94566
a90e3b691738b7aa64868ab8d00bea6d	93b2cb19723f915a805a4cd20f594f07	0.94566
a90e3b691738b7aa64868ab8d00bea6d	c0086f50c449526558dcbb7fd569043f	0.94566
a90e3b691738b7aa64868ab8d00bea6d	f77e657f16617d6eefe6c409ead568e8	0.94566
a90e3b691738b7aa64868ab8d00bea6d	94e10c92d744617d9880b78eef11a2c6	0.94566
a90e3b691738b7aa64868ab8d00bea6d	ac2662d36a91cba0d6b8fee15d75ead0	0.94566
a90e3b691738b7aa64868ab8d00bea6d	c1b64e9ee44cded7174eb92430f7ac95	0.94566
a90e3b691738b7aa64868ab8d00bea6d	7fd5a794906d83f5fc04700094b52f38	0.94566
a90e3b691738b7aa64868ab8d00bea6d	b70898de946a803c963584e6b7b27bea	0.94566
a90e3b691738b7aa64868ab8d00bea6d	51262c0e7e875ebe8e03cf077ac177c5	0.94566
a90e3b691738b7aa64868ab8d00bea6d	d9db432ac0d299dffcadd359c0e7120b	0.94566
a90e3b691738b7aa64868ab8d00bea6d	f5894077625c801e89b4365be5964095	0.94566
a90e3b691738b7aa64868ab8d00bea6d	4ec07abdb860bda723972447dfa55ddc	0.94566
a90e3b691738b7aa64868ab8d00bea6d	3fc31391229b05e4b66e7950f1548840	0.94566
a90e3b691738b7aa64868ab8d00bea6d	9fc85a26ba4e62372a0510e76a6e616b	0.94566
a90e3b691738b7aa64868ab8d00bea6d	39e70d892a1b487e00ae81b7b70491af	0.94566
a90e3b691738b7aa64868ab8d00bea6d	6b8146cb68c2d5021bd95561bfc0e7ee	0.94566
a90e3b691738b7aa64868ab8d00bea6d	1b6b519d3d862ee5aa5f5fb031cbedd7	0.94566
a90e3b691738b7aa64868ab8d00bea6d	65cfe8b097fd708eaba653545f8f8e69	0.94566
a90e3b691738b7aa64868ab8d00bea6d	8c357abf174733947c627dde698d3f93	0.94566
932c94ef9ab7cd5dbb25803383b81a78	f7e6c08a092ded8ff3312cab3b1b2f2d	0.94566
932c94ef9ab7cd5dbb25803383b81a78	f442143468f99eaa62a01a7bdf325409	0.94566
932c94ef9ab7cd5dbb25803383b81a78	99847a0aad4c578374c41bae937991b6	0.94566
932c94ef9ab7cd5dbb25803383b81a78	bf7c8b35b60d08c0bf62fc2894b0a543	0.94566
932c94ef9ab7cd5dbb25803383b81a78	8bb8eb47069b3e919959aa111ba859ec	0.94566
932c94ef9ab7cd5dbb25803383b81a78	f6608e71c06674d8840e9cb8ccb2e74d	0.94566
932c94ef9ab7cd5dbb25803383b81a78	15e3be12e07b72a573253f48a59b633d	0.94566
932c94ef9ab7cd5dbb25803383b81a78	aa13b33f5e1937ef92b901d75f190fbe	0.94566
d127f00c91d8278183df0c94544bd583	33ec2672acc39980a0e805c26d08cb79	0.94566
d127f00c91d8278183df0c94544bd583	fbe36876d118508cf7e4fb67cbc032e2	0.94566
d127f00c91d8278183df0c94544bd583	4e7254e7faee92f9868759c556ed73ae	0.94566
d127f00c91d8278183df0c94544bd583	99847a0aad4c578374c41bae937991b6	0.94566
d127f00c91d8278183df0c94544bd583	265f93f99468f9605a5031488c920eb1	0.94566
d127f00c91d8278183df0c94544bd583	7233e4cdaface6927d43773c964f94e4	0.94566
d127f00c91d8278183df0c94544bd583	8a13f20e0e4548413b745bf51c9980b3	0.94566
d127f00c91d8278183df0c94544bd583	cf128de805981908ffc28e6be7a5f7e8	0.94566
d127f00c91d8278183df0c94544bd583	c4b50715602cceccd5ba14916e71bbbb	0.94566
d127f00c91d8278183df0c94544bd583	8c357abf174733947c627dde698d3f93	0.94566
f322ca331475f9f8e883a0bc356b5c64	f7e6c08a092ded8ff3312cab3b1b2f2d	0.94566
f322ca331475f9f8e883a0bc356b5c64	1c926ca8fd259c89ece07dfe79c62dfa	0.94566
f322ca331475f9f8e883a0bc356b5c64	2263acc68242b53cdc14a7ca1fccd018	0.94566
f322ca331475f9f8e883a0bc356b5c64	10ca86dccfe1472117a0599a1f4f1635	0.94566
f322ca331475f9f8e883a0bc356b5c64	4626abe1b3958f24002d1d38b7e8ac91	0.94566
f322ca331475f9f8e883a0bc356b5c64	759ac655001806785218ecfb18b06a1d	0.94566
f322ca331475f9f8e883a0bc356b5c64	96c5f928b96ff41ecf26e1e13259fa64	0.94566
f322ca331475f9f8e883a0bc356b5c64	a018dfb928f901a2fbc3ee62c0e7362b	0.94566
82ab1c4ae0247432ba9b9493cfbc6b14	3cb8694ff15e6edee5f2eb61a64c0aa9	0.94566
82ab1c4ae0247432ba9b9493cfbc6b14	5a6ac5dc72f33d90bc3e9891f2564f84	0.94566
82ab1c4ae0247432ba9b9493cfbc6b14	65d24cb700a481a668a269cc4d4c0258	0.94566
82ab1c4ae0247432ba9b9493cfbc6b14	e34b34995e0f45e58c99616d7abe9ef8	0.94566
82ab1c4ae0247432ba9b9493cfbc6b14	675f47f52ab28cdcf30e23836997082e	0.94566
880f19723e37a17e038c37be8f22c3a8	8e5281a27251d237ae4b293a88ea1fca	0.94566
880f19723e37a17e038c37be8f22c3a8	b34fb0904caa8c1db6df0f5cb24da6b2	0.94566
880f19723e37a17e038c37be8f22c3a8	47591358addd7be611d87aa5fb1d0501	0.94566
880f19723e37a17e038c37be8f22c3a8	fa493aa4f1faf6be9820d19f83cdd969	0.94566
880f19723e37a17e038c37be8f22c3a8	96c5f928b96ff41ecf26e1e13259fa64	0.94566
880f19723e37a17e038c37be8f22c3a8	39e70d892a1b487e00ae81b7b70491af	0.94566
fed75833daf5ab33e23b2bf6f6ce1d33	9ff870beffc06840cef39de196bcc29e	0.94566
fed75833daf5ab33e23b2bf6f6ce1d33	5100343c1e946364d20e495e3e209bc6	0.94566
fed75833daf5ab33e23b2bf6f6ce1d33	5511d7e46c7812c750470a3d28c32f4d	0.94566
fed75833daf5ab33e23b2bf6f6ce1d33	d56d487973829be6bedf092e2fc3b90e	0.94566
fed75833daf5ab33e23b2bf6f6ce1d33	0f6006dc9edddee73c4e03a918c3aa66	0.94566
fed75833daf5ab33e23b2bf6f6ce1d33	fa493aa4f1faf6be9820d19f83cdd969	0.94566
70d97de680664e76b509834800991031	d1c3545aa01f01c148c8b11eef74200b	0.94566
70d97de680664e76b509834800991031	736281d70ec672edc46ef1986b47e1a9	0.94566
70d97de680664e76b509834800991031	69916a1cde832bb15ac5acc0ef5e3518	0.94566
a1a830867e5263c7c5a346034d0665dd	c5110bc820a22854866d6b5ee21344c2	0.94566
a1a830867e5263c7c5a346034d0665dd	3ceb758c49920cee71fe6e65c3493a43	0.94566
a1a830867e5263c7c5a346034d0665dd	5511d7e46c7812c750470a3d28c32f4d	0.94566
a1a830867e5263c7c5a346034d0665dd	790e976dfd7c72094f38aee1b759d212	0.94566
a1a830867e5263c7c5a346034d0665dd	8d2788d498bc6528a24e66350380fb78	0.94566
a1a830867e5263c7c5a346034d0665dd	55814a4ea8a202d9b328c7b68584bf90	0.94566
a1a830867e5263c7c5a346034d0665dd	60da738bc4b046c5c5c7b22f77832a90	0.94566
a1a830867e5263c7c5a346034d0665dd	0a7cff6daea23145cea146dfb78df6df	0.94566
a1a830867e5263c7c5a346034d0665dd	baaac2b84af41b8a30bd36a3ce0afdf6	0.94566
a1a830867e5263c7c5a346034d0665dd	6916d97494489296801671b8d18a0309	0.94566
a1a830867e5263c7c5a346034d0665dd	c6911e1ac67555f4a10f39df29c35a82	0.94566
a1a830867e5263c7c5a346034d0665dd	0f6006dc9edddee73c4e03a918c3aa66	0.94566
a1a830867e5263c7c5a346034d0665dd	6dd57d68807306a85a30f15e758134d4	0.94566
a1a830867e5263c7c5a346034d0665dd	5f042513c67fdd55888051594cb486ac	0.94566
a1a830867e5263c7c5a346034d0665dd	90a3648550c58dac0d8a380eeeb8cf17	0.94566
a1a830867e5263c7c5a346034d0665dd	eb56533502639959923e46d4d4ce2d36	0.94566
a1a830867e5263c7c5a346034d0665dd	8c68c8f1ca3ceb58bd95ff2e2f7444af	0.94566
a1a830867e5263c7c5a346034d0665dd	9d510a1ee7233ab15bca064515917a04	0.94566
a1a830867e5263c7c5a346034d0665dd	b092f7f3425cc2dfc9965117ab63717d	0.94566
a1a830867e5263c7c5a346034d0665dd	63bf8d81940fc455b5cc541cc7a660bb	0.94566
a1a830867e5263c7c5a346034d0665dd	0b04a06598d5b5b3f758c73cb8792ab9	0.94566
a1a830867e5263c7c5a346034d0665dd	96a9773aa46a3d58007f76fad394d5f4	0.94566
a1a830867e5263c7c5a346034d0665dd	20dd251ae02aea592d801d239b63f9e4	0.94566
a1a830867e5263c7c5a346034d0665dd	3a9208d106ad373e9d8528bbe6b9c5ad	0.94566
6144a85c82e8a1270fcf3d3d9e75a21f	e543abb5f12c23a50072118b9454f001	0.94566
6aa1d95a0d4764b83e0925b3122274ed	7ba3d25c1364399fcd59076c4d90732b	0.94566
6aa1d95a0d4764b83e0925b3122274ed	d239e96a3f1ad1ebf4ed9aee42656456	0.94566
6aa1d95a0d4764b83e0925b3122274ed	3b3bbab9ab17d53dd61ce47bd1aef746	0.94566
c4b95a9b5ca76755b59ccd86ae6deba0	a18f563b60ef31afe1d5aaf0b4331f3d	0.94566
c4b95a9b5ca76755b59ccd86ae6deba0	8e0853ccd09522a3a8c2742a374fab62	0.94566
c4b95a9b5ca76755b59ccd86ae6deba0	eda6f9881bff8aea35a15d26cc534efd	0.94566
c4b95a9b5ca76755b59ccd86ae6deba0	0166ac0863837f3e87a4a75afd9e7ddf	0.94566
c4b95a9b5ca76755b59ccd86ae6deba0	e39b0a8cf183344fae62c2e14a46a910	0.94566
c4b95a9b5ca76755b59ccd86ae6deba0	05ee809c46ccca3097f50d1123609e5a	0.94566
c4b95a9b5ca76755b59ccd86ae6deba0	59702671fe9c6d0fafd8225d1f68bd1f	0.94566
c4b95a9b5ca76755b59ccd86ae6deba0	9b1e92389ef0cc5317353e8ea8426a70	0.94566
c4b95a9b5ca76755b59ccd86ae6deba0	ac2662d36a91cba0d6b8fee15d75ead0	0.94566
c4b95a9b5ca76755b59ccd86ae6deba0	675f47f52ab28cdcf30e23836997082e	0.94566
c4b95a9b5ca76755b59ccd86ae6deba0	39e70d892a1b487e00ae81b7b70491af	0.94566
cb580583ea3fdb75c58a573e23f3b42e	f1fec4dfaa2202d002a437cc4a248e66	0.94566
cb580583ea3fdb75c58a573e23f3b42e	a9fe2fa970bc4b6487df11daf151ee81	0.94566
cb580583ea3fdb75c58a573e23f3b42e	93b2cb19723f915a805a4cd20f594f07	0.94566
cb580583ea3fdb75c58a573e23f3b42e	eda6f9881bff8aea35a15d26cc534efd	0.94566
cb580583ea3fdb75c58a573e23f3b42e	22f26cc2c7277df74d59aa1f5adb05e4	0.94566
cb580583ea3fdb75c58a573e23f3b42e	cefbbaabbe2748b243095e71e7b86265	0.94566
cb580583ea3fdb75c58a573e23f3b42e	801463e61abcfcc2938e84e16c3929d6	0.94566
cb580583ea3fdb75c58a573e23f3b42e	a1219c3e384b263c96f09ff1f1cea107	0.94566
cb580583ea3fdb75c58a573e23f3b42e	f6608e71c06674d8840e9cb8ccb2e74d	0.94566
cb580583ea3fdb75c58a573e23f3b42e	bdb19eb6ef13bfed15a7ebb821a6d403	0.94566
cb580583ea3fdb75c58a573e23f3b42e	9d510a1ee7233ab15bca064515917a04	0.94566
458be152e26161a413024ea884a040eb	a9fe2fa970bc4b6487df11daf151ee81	0.94566
458be152e26161a413024ea884a040eb	612178cd150839c87d82cdbf4fbb8b4b	0.94566
458be152e26161a413024ea884a040eb	37f45f705bfc321df25ab0c8063a9618	0.94566
458be152e26161a413024ea884a040eb	624331d46eb13cb2bafe7e8a846c0bdc	0.94566
458be152e26161a413024ea884a040eb	3a9208d106ad373e9d8528bbe6b9c5ad	0.94566
a05ba1ba10f7ad7834d8ae32490b920c	c5110bc820a22854866d6b5ee21344c2	0.94566
a05ba1ba10f7ad7834d8ae32490b920c	82e4b4a214f2418f9f684f6e28464431	0.94566
a05ba1ba10f7ad7834d8ae32490b920c	1040ffc55a036894e9ec2cbe47802e07	0.94566
a05ba1ba10f7ad7834d8ae32490b920c	05734150853338b5e489721794a7c826	0.94566
a05ba1ba10f7ad7834d8ae32490b920c	60da738bc4b046c5c5c7b22f77832a90	0.94566
a05ba1ba10f7ad7834d8ae32490b920c	441b997bec002a7fe05e0ad7e4bfc14e	0.94566
a05ba1ba10f7ad7834d8ae32490b920c	da17572657f5636c66a5ce8c2d04922f	0.94566
a05ba1ba10f7ad7834d8ae32490b920c	b34fb0904caa8c1db6df0f5cb24da6b2	0.94566
a05ba1ba10f7ad7834d8ae32490b920c	64bcf94b568e9cbaa0404d841ad75435	0.94566
a05ba1ba10f7ad7834d8ae32490b920c	696fcd39d96eaa84510ddbb3e00d8263	0.94566
a05ba1ba10f7ad7834d8ae32490b920c	8bd33e664b9a859086f52c1737c36339	0.94566
a05ba1ba10f7ad7834d8ae32490b920c	5d0fee9c66e12c632ee634131979c10c	0.94566
a05ba1ba10f7ad7834d8ae32490b920c	337145739bb153cea3d3c53595acbf22	0.94566
a05ba1ba10f7ad7834d8ae32490b920c	0f407bb44ce651722dc620d0f9490b63	0.94566
a05ba1ba10f7ad7834d8ae32490b920c	afede6d9aa8210bc3d25c9253a7a4f84	0.94566
a05ba1ba10f7ad7834d8ae32490b920c	4cdf9aeb68a51fc2fff2f82e2e682c5b	0.94566
a05ba1ba10f7ad7834d8ae32490b920c	79b7674106bc3fb9eccf73c5bd64bfb5	0.94566
a05ba1ba10f7ad7834d8ae32490b920c	a3ce2b76a5b2daccdcc5c58ee218896a	0.94566
a05ba1ba10f7ad7834d8ae32490b920c	aa13b33f5e1937ef92b901d75f190fbe	0.94566
a05ba1ba10f7ad7834d8ae32490b920c	6b8146cb68c2d5021bd95561bfc0e7ee	0.94566
a05ba1ba10f7ad7834d8ae32490b920c	4975e9498ed5c0822a2f200287a6c612	0.94566
a05ba1ba10f7ad7834d8ae32490b920c	6d17ed796a25ea35dc19e67c30960976	0.94566
a05ba1ba10f7ad7834d8ae32490b920c	20dd251ae02aea592d801d239b63f9e4	0.94566
a05ba1ba10f7ad7834d8ae32490b920c	55ba03929d537e43f91aa98c36421f34	0.94566
ce851835782c77fa754b92d567741d8d	c5110bc820a22854866d6b5ee21344c2	0.94566
ce851835782c77fa754b92d567741d8d	5511d7e46c7812c750470a3d28c32f4d	0.94566
ce851835782c77fa754b92d567741d8d	790e976dfd7c72094f38aee1b759d212	0.94566
ce851835782c77fa754b92d567741d8d	8d2788d498bc6528a24e66350380fb78	0.94566
ce851835782c77fa754b92d567741d8d	55814a4ea8a202d9b328c7b68584bf90	0.94566
ce851835782c77fa754b92d567741d8d	60da738bc4b046c5c5c7b22f77832a90	0.94566
ce851835782c77fa754b92d567741d8d	0a7cff6daea23145cea146dfb78df6df	0.94566
ce851835782c77fa754b92d567741d8d	6916d97494489296801671b8d18a0309	0.94566
ce851835782c77fa754b92d567741d8d	0f6006dc9edddee73c4e03a918c3aa66	0.94566
ce851835782c77fa754b92d567741d8d	bdb19eb6ef13bfed15a7ebb821a6d403	0.94566
ce851835782c77fa754b92d567741d8d	5f042513c67fdd55888051594cb486ac	0.94566
ce851835782c77fa754b92d567741d8d	8c68c8f1ca3ceb58bd95ff2e2f7444af	0.94566
ce851835782c77fa754b92d567741d8d	b092f7f3425cc2dfc9965117ab63717d	0.94566
ce851835782c77fa754b92d567741d8d	0b04a06598d5b5b3f758c73cb8792ab9	0.94566
ce851835782c77fa754b92d567741d8d	20dd251ae02aea592d801d239b63f9e4	0.94566
ce851835782c77fa754b92d567741d8d	3a9208d106ad373e9d8528bbe6b9c5ad	0.94566
9ff870beffc06840cef39de196bcc29e	10ca86dccfe1472117a0599a1f4f1635	0.94566
e11b4263eb7a82f04b0bc4333a6bad57	eb32459bd42821aedd3001b8cfbb676e	0.94566
e11b4263eb7a82f04b0bc4333a6bad57	5135b86f37750dfe66b4941dbb4cf998	0.94566
e11b4263eb7a82f04b0bc4333a6bad57	7eab0a327e61cde847742596712dcadb	0.94566
e11b4263eb7a82f04b0bc4333a6bad57	e8ead60320c81b952c5a45aa67271a48	0.94566
bf4864246283a3df9d2d93cd25ea6c74	1e3a2aad4f8f247c7245ee7836ba20bd	0.94566
bf4864246283a3df9d2d93cd25ea6c74	93b2cb19723f915a805a4cd20f594f07	0.94566
bf4864246283a3df9d2d93cd25ea6c74	f77e657f16617d6eefe6c409ead568e8	0.94566
bf4864246283a3df9d2d93cd25ea6c74	94e10c92d744617d9880b78eef11a2c6	0.94566
bf4864246283a3df9d2d93cd25ea6c74	7fd5a794906d83f5fc04700094b52f38	0.94566
bf4864246283a3df9d2d93cd25ea6c74	b70898de946a803c963584e6b7b27bea	0.94566
bf4864246283a3df9d2d93cd25ea6c74	51262c0e7e875ebe8e03cf077ac177c5	0.94566
bf4864246283a3df9d2d93cd25ea6c74	f5894077625c801e89b4365be5964095	0.94566
bf4864246283a3df9d2d93cd25ea6c74	4ec07abdb860bda723972447dfa55ddc	0.94566
bf4864246283a3df9d2d93cd25ea6c74	9fc85a26ba4e62372a0510e76a6e616b	0.94566
bf4864246283a3df9d2d93cd25ea6c74	6b8146cb68c2d5021bd95561bfc0e7ee	0.94566
bf4864246283a3df9d2d93cd25ea6c74	1b6b519d3d862ee5aa5f5fb031cbedd7	0.94566
bf4864246283a3df9d2d93cd25ea6c74	65cfe8b097fd708eaba653545f8f8e69	0.94566
bf4864246283a3df9d2d93cd25ea6c74	8c357abf174733947c627dde698d3f93	0.94566
bf486bb1d9da587f9f41912eee4b2e77	8f9f1aae9646df33f47a6cf3fe8e9739	0.94566
bf486bb1d9da587f9f41912eee4b2e77	1438af8d3f304470c4aee3d93544521e	0.94566
bf486bb1d9da587f9f41912eee4b2e77	3548d70f9eb776a4c51d2f64abc3f1a1	0.94566
bf486bb1d9da587f9f41912eee4b2e77	4ec07abdb860bda723972447dfa55ddc	0.94566
9a9c72fade7074b9d85aebd9c40e182c	8cf51cdf7c7c33f95196eed87ff337de	0.94566
9a9c72fade7074b9d85aebd9c40e182c	7c762c36ae20866e1998a696f50f9716	0.94566
9a9c72fade7074b9d85aebd9c40e182c	9bae969e46731bfb02da1c09e93c5605	0.94566
9a9c72fade7074b9d85aebd9c40e182c	736281d70ec672edc46ef1986b47e1a9	0.94566
9a9c72fade7074b9d85aebd9c40e182c	bce23b9b289bb43bff25cd148f080557	0.94566
9a9c72fade7074b9d85aebd9c40e182c	bc61c16683aa91f4a47a2266993a69d1	0.94566
9a9c72fade7074b9d85aebd9c40e182c	93c1449aef105c81ee44691574a04fa6	0.94566
9a9c72fade7074b9d85aebd9c40e182c	fcb732848a3d018dde12adafdf5fa5f9	0.94566
9a9c72fade7074b9d85aebd9c40e182c	3f1304fc1b0de80cad541bdcff9676a5	0.94566
5d4637e6bc731530d4e85609c34df22e	da84b875691faabf9bc768ea4ed6851a	0.94566
5d4637e6bc731530d4e85609c34df22e	f7d86c8f4aed4693cbdb2dfc950cc9ad	0.94566
69a038a32cdce0e9c59aa15868003dc0	82e4b4a214f2418f9f684f6e28464431	0.94566
69a038a32cdce0e9c59aa15868003dc0	9002f85b03d9dcb79bdf61619b029a94	0.94566
69a038a32cdce0e9c59aa15868003dc0	e39b0a8cf183344fae62c2e14a46a910	0.94566
69a038a32cdce0e9c59aa15868003dc0	da17572657f5636c66a5ce8c2d04922f	0.94566
69a038a32cdce0e9c59aa15868003dc0	59702671fe9c6d0fafd8225d1f68bd1f	0.94566
69a038a32cdce0e9c59aa15868003dc0	ac2662d36a91cba0d6b8fee15d75ead0	0.94566
69a038a32cdce0e9c59aa15868003dc0	f6ecd0322cb47d8786f055d9bcd06354	0.94566
69a038a32cdce0e9c59aa15868003dc0	39e70d892a1b487e00ae81b7b70491af	0.94566
c5110bc820a22854866d6b5ee21344c2	82e4b4a214f2418f9f684f6e28464431	0.94566
c5110bc820a22854866d6b5ee21344c2	1040ffc55a036894e9ec2cbe47802e07	0.94566
c5110bc820a22854866d6b5ee21344c2	5511d7e46c7812c750470a3d28c32f4d	0.94566
c5110bc820a22854866d6b5ee21344c2	790e976dfd7c72094f38aee1b759d212	0.94566
c5110bc820a22854866d6b5ee21344c2	8d2788d498bc6528a24e66350380fb78	0.94566
c5110bc820a22854866d6b5ee21344c2	55814a4ea8a202d9b328c7b68584bf90	0.94566
c5110bc820a22854866d6b5ee21344c2	d56d487973829be6bedf092e2fc3b90e	0.94566
c5110bc820a22854866d6b5ee21344c2	05734150853338b5e489721794a7c826	0.94566
c5110bc820a22854866d6b5ee21344c2	60da738bc4b046c5c5c7b22f77832a90	0.94566
c5110bc820a22854866d6b5ee21344c2	0a7cff6daea23145cea146dfb78df6df	0.94566
c5110bc820a22854866d6b5ee21344c2	441b997bec002a7fe05e0ad7e4bfc14e	0.94566
c5110bc820a22854866d6b5ee21344c2	6916d97494489296801671b8d18a0309	0.94566
c5110bc820a22854866d6b5ee21344c2	b34fb0904caa8c1db6df0f5cb24da6b2	0.94566
c5110bc820a22854866d6b5ee21344c2	0f6006dc9edddee73c4e03a918c3aa66	0.94566
c5110bc820a22854866d6b5ee21344c2	e131d6b9e4f997788460a450a69c3a99	0.94566
c5110bc820a22854866d6b5ee21344c2	64bcf94b568e9cbaa0404d841ad75435	0.94566
c5110bc820a22854866d6b5ee21344c2	696fcd39d96eaa84510ddbb3e00d8263	0.94566
c5110bc820a22854866d6b5ee21344c2	5f042513c67fdd55888051594cb486ac	0.94566
c5110bc820a22854866d6b5ee21344c2	8bd33e664b9a859086f52c1737c36339	0.94566
c5110bc820a22854866d6b5ee21344c2	5d0fee9c66e12c632ee634131979c10c	0.94566
c5110bc820a22854866d6b5ee21344c2	337145739bb153cea3d3c53595acbf22	0.94566
c5110bc820a22854866d6b5ee21344c2	0f407bb44ce651722dc620d0f9490b63	0.94566
c5110bc820a22854866d6b5ee21344c2	8c68c8f1ca3ceb58bd95ff2e2f7444af	0.94566
c5110bc820a22854866d6b5ee21344c2	afede6d9aa8210bc3d25c9253a7a4f84	0.94566
c5110bc820a22854866d6b5ee21344c2	b092f7f3425cc2dfc9965117ab63717d	0.94566
c5110bc820a22854866d6b5ee21344c2	4cdf9aeb68a51fc2fff2f82e2e682c5b	0.94566
c5110bc820a22854866d6b5ee21344c2	49c1ac3db0834e9040ad888443339e6f	0.94566
c5110bc820a22854866d6b5ee21344c2	79b7674106bc3fb9eccf73c5bd64bfb5	0.94566
c5110bc820a22854866d6b5ee21344c2	a3ce2b76a5b2daccdcc5c58ee218896a	0.94566
c5110bc820a22854866d6b5ee21344c2	aa13b33f5e1937ef92b901d75f190fbe	0.94566
c5110bc820a22854866d6b5ee21344c2	6b8146cb68c2d5021bd95561bfc0e7ee	0.94566
c5110bc820a22854866d6b5ee21344c2	0b04a06598d5b5b3f758c73cb8792ab9	0.94566
c5110bc820a22854866d6b5ee21344c2	4975e9498ed5c0822a2f200287a6c612	0.94566
c5110bc820a22854866d6b5ee21344c2	6d17ed796a25ea35dc19e67c30960976	0.94566
c5110bc820a22854866d6b5ee21344c2	20dd251ae02aea592d801d239b63f9e4	0.94566
c5110bc820a22854866d6b5ee21344c2	3a9208d106ad373e9d8528bbe6b9c5ad	0.94566
c5110bc820a22854866d6b5ee21344c2	55ba03929d537e43f91aa98c36421f34	0.94566
c824e808b7a8c64946538e9eb6d48fbc	416c2d057afa011278e4072aa985db0a	0.94566
5451d510f6989eb29028ea625b9b55ae	d6165e0582a03dd12b473c294cdd3bcd	0.94566
5451d510f6989eb29028ea625b9b55ae	84e422b114928ef1d913b13075ca5903	0.94566
5451d510f6989eb29028ea625b9b55ae	8080b535f4bf339a8d5fee285ddab60b	0.94566
5451d510f6989eb29028ea625b9b55ae	759ac655001806785218ecfb18b06a1d	0.94566
8cf51cdf7c7c33f95196eed87ff337de	7c762c36ae20866e1998a696f50f9716	0.94566
8cf51cdf7c7c33f95196eed87ff337de	8645ac02dc586fcd4a083b94279834f7	0.94566
8cf51cdf7c7c33f95196eed87ff337de	9bae969e46731bfb02da1c09e93c5605	0.94566
8cf51cdf7c7c33f95196eed87ff337de	bc61c16683aa91f4a47a2266993a69d1	0.94566
8cf51cdf7c7c33f95196eed87ff337de	93c1449aef105c81ee44691574a04fa6	0.94566
d2ab948d10088c5dc2d6ebc1858bc08a	d309d639912b9c368bc80e4a5c48bae2	0.94566
d2ab948d10088c5dc2d6ebc1858bc08a	2ffc32fd670446fa2a95b2209aaf1a9a	0.94566
d2ab948d10088c5dc2d6ebc1858bc08a	741de23dfdfb60ee191b1bf3fb3e60e7	0.94566
f7e6c08a092ded8ff3312cab3b1b2f2d	1c926ca8fd259c89ece07dfe79c62dfa	0.94566
f7e6c08a092ded8ff3312cab3b1b2f2d	2263acc68242b53cdc14a7ca1fccd018	0.94566
f7e6c08a092ded8ff3312cab3b1b2f2d	10ca86dccfe1472117a0599a1f4f1635	0.94566
f7e6c08a092ded8ff3312cab3b1b2f2d	8bb8eb47069b3e919959aa111ba859ec	0.94566
f7e6c08a092ded8ff3312cab3b1b2f2d	4626abe1b3958f24002d1d38b7e8ac91	0.94566
f7e6c08a092ded8ff3312cab3b1b2f2d	db479043d01c7c0f52d725110a613bdc	0.94566
f7e6c08a092ded8ff3312cab3b1b2f2d	ab13b942cfeed744362c9214b1c659ba	0.94566
f7e6c08a092ded8ff3312cab3b1b2f2d	759ac655001806785218ecfb18b06a1d	0.94566
f7e6c08a092ded8ff3312cab3b1b2f2d	96c5f928b96ff41ecf26e1e13259fa64	0.94566
f7e6c08a092ded8ff3312cab3b1b2f2d	a018dfb928f901a2fbc3ee62c0e7362b	0.94566
f7e6c08a092ded8ff3312cab3b1b2f2d	aa13b33f5e1937ef92b901d75f190fbe	0.94566
40a3d5eb1bbf06dd8a8a58bcdc643058	5a6ac5dc72f33d90bc3e9891f2564f84	0.94566
40a3d5eb1bbf06dd8a8a58bcdc643058	da8260f3fd39c10fa491e191f903c14e	0.94566
40a3d5eb1bbf06dd8a8a58bcdc643058	7f02f8891c18a78c1ca3b37b4aa5ee79	0.94566
a18f563b60ef31afe1d5aaf0b4331f3d	8e0853ccd09522a3a8c2742a374fab62	0.94566
a18f563b60ef31afe1d5aaf0b4331f3d	eda6f9881bff8aea35a15d26cc534efd	0.94566
a18f563b60ef31afe1d5aaf0b4331f3d	0166ac0863837f3e87a4a75afd9e7ddf	0.94566
a18f563b60ef31afe1d5aaf0b4331f3d	05ee809c46ccca3097f50d1123609e5a	0.94566
a18f563b60ef31afe1d5aaf0b4331f3d	9b1e92389ef0cc5317353e8ea8426a70	0.94566
a18f563b60ef31afe1d5aaf0b4331f3d	c1b64e9ee44cded7174eb92430f7ac95	0.94566
a18f563b60ef31afe1d5aaf0b4331f3d	d9db432ac0d299dffcadd359c0e7120b	0.94566
a18f563b60ef31afe1d5aaf0b4331f3d	675f47f52ab28cdcf30e23836997082e	0.94566
a18f563b60ef31afe1d5aaf0b4331f3d	55ba03929d537e43f91aa98c36421f34	0.94566
8e5281a27251d237ae4b293a88ea1fca	b34fb0904caa8c1db6df0f5cb24da6b2	0.94566
8e5281a27251d237ae4b293a88ea1fca	fa493aa4f1faf6be9820d19f83cdd969	0.94566
8e5281a27251d237ae4b293a88ea1fca	96c5f928b96ff41ecf26e1e13259fa64	0.94566
8e5281a27251d237ae4b293a88ea1fca	39e70d892a1b487e00ae81b7b70491af	0.94566
c3b7bf0e9723ee25d30372e02f56677d	16bf085946684ed5fe695352fdaa04bd	0.94566
c3b7bf0e9723ee25d30372e02f56677d	eb7ad7504f3a8f3dfa3361a19fc14984	0.94566
c3b7bf0e9723ee25d30372e02f56677d	dffe8a7b6f5c4f32a70cf6caa6c988c8	0.94566
c3b7bf0e9723ee25d30372e02f56677d	bce23b9b289bb43bff25cd148f080557	0.94566
c3b7bf0e9723ee25d30372e02f56677d	68b6f352877ccbaddbc5ebbdcd2c87a4	0.94566
c3b7bf0e9723ee25d30372e02f56677d	afede6d9aa8210bc3d25c9253a7a4f84	0.94566
c3b7bf0e9723ee25d30372e02f56677d	522f072a3e8ca88b8f8bdecea04465d9	0.94566
c3b7bf0e9723ee25d30372e02f56677d	3f1304fc1b0de80cad541bdcff9676a5	0.94566
f442143468f99eaa62a01a7bdf325409	99847a0aad4c578374c41bae937991b6	0.94566
f442143468f99eaa62a01a7bdf325409	bf7c8b35b60d08c0bf62fc2894b0a543	0.94566
f442143468f99eaa62a01a7bdf325409	f6608e71c06674d8840e9cb8ccb2e74d	0.94566
f442143468f99eaa62a01a7bdf325409	15e3be12e07b72a573253f48a59b633d	0.94566
f1fec4dfaa2202d002a437cc4a248e66	6914f32d9ee2679f7f74b6d5f8f1e9e7	0.94566
f1fec4dfaa2202d002a437cc4a248e66	a9fe2fa970bc4b6487df11daf151ee81	0.94566
f1fec4dfaa2202d002a437cc4a248e66	eda6f9881bff8aea35a15d26cc534efd	0.94566
f1fec4dfaa2202d002a437cc4a248e66	cefbbaabbe2748b243095e71e7b86265	0.94566
f1fec4dfaa2202d002a437cc4a248e66	801463e61abcfcc2938e84e16c3929d6	0.94566
f1fec4dfaa2202d002a437cc4a248e66	ec9285bc70461b117d8a562a8ecc6779	0.94566
f1fec4dfaa2202d002a437cc4a248e66	e4db4b69f4dcb92e21a950f284ec8b75	0.94566
f1fec4dfaa2202d002a437cc4a248e66	a1219c3e384b263c96f09ff1f1cea107	0.94566
f1fec4dfaa2202d002a437cc4a248e66	f6608e71c06674d8840e9cb8ccb2e74d	0.94566
f1fec4dfaa2202d002a437cc4a248e66	bdb19eb6ef13bfed15a7ebb821a6d403	0.94566
f1fec4dfaa2202d002a437cc4a248e66	9d510a1ee7233ab15bca064515917a04	0.94566
7ee97d95e00cb93ca7618c360fb50a46	f5894077625c801e89b4365be5964095	0.94566
53b359329adc6fecebfc0eb42b6c0e71	6005a02ca4a778165ea119d7f2dab69f	0.94566
493972dbac72c6de5d9e0713cb321192	443164c71768102f8656148048472610	0.94566
493972dbac72c6de5d9e0713cb321192	5d0fee9c66e12c632ee634131979c10c	0.94566
2265a564eb3d7c2e1660a58fa49aae64	0f02ff7fd08fac168e40a173832ebc36	0.94566
2265a564eb3d7c2e1660a58fa49aae64	2c914ca6839f67afcfecf21668190d7e	0.94566
2265a564eb3d7c2e1660a58fa49aae64	c0086f50c449526558dcbb7fd569043f	0.94566
2265a564eb3d7c2e1660a58fa49aae64	47591358addd7be611d87aa5fb1d0501	0.94566
2265a564eb3d7c2e1660a58fa49aae64	4edec3e2a4504a62bdc1387a9f7bcc26	0.94566
2265a564eb3d7c2e1660a58fa49aae64	da8260f3fd39c10fa491e191f903c14e	0.94566
3cb8694ff15e6edee5f2eb61a64c0aa9	5a6ac5dc72f33d90bc3e9891f2564f84	0.94566
3cb8694ff15e6edee5f2eb61a64c0aa9	675f47f52ab28cdcf30e23836997082e	0.94566
b800ef37e180548cc94019d2c15a2d8d	aff65597908099c9ee322aff6bec0a68	0.94566
b800ef37e180548cc94019d2c15a2d8d	c2146a3af5097133d4583f03c3a6b4a5	0.94566
60c0b3ef3f120e37a029f9f74dd4fe22	f663b8bf5da90a50a54540d696f1a8a4	0.94566
60c0b3ef3f120e37a029f9f74dd4fe22	7fc0ccbd86b09190f44369a934b3456c	0.94566
60c0b3ef3f120e37a029f9f74dd4fe22	eb32459bd42821aedd3001b8cfbb676e	0.94566
60c0b3ef3f120e37a029f9f74dd4fe22	5135b86f37750dfe66b4941dbb4cf998	0.94566
60c0b3ef3f120e37a029f9f74dd4fe22	7eab0a327e61cde847742596712dcadb	0.94566
60c0b3ef3f120e37a029f9f74dd4fe22	0f407bb44ce651722dc620d0f9490b63	0.94566
60c0b3ef3f120e37a029f9f74dd4fe22	e8ead60320c81b952c5a45aa67271a48	0.94566
82e4b4a214f2418f9f684f6e28464431	1040ffc55a036894e9ec2cbe47802e07	0.94566
82e4b4a214f2418f9f684f6e28464431	9002f85b03d9dcb79bdf61619b029a94	0.94566
82e4b4a214f2418f9f684f6e28464431	05734150853338b5e489721794a7c826	0.94566
82e4b4a214f2418f9f684f6e28464431	60da738bc4b046c5c5c7b22f77832a90	0.94566
82e4b4a214f2418f9f684f6e28464431	441b997bec002a7fe05e0ad7e4bfc14e	0.94566
82e4b4a214f2418f9f684f6e28464431	da17572657f5636c66a5ce8c2d04922f	0.94566
82e4b4a214f2418f9f684f6e28464431	b34fb0904caa8c1db6df0f5cb24da6b2	0.94566
82e4b4a214f2418f9f684f6e28464431	f6ecd0322cb47d8786f055d9bcd06354	0.94566
82e4b4a214f2418f9f684f6e28464431	64bcf94b568e9cbaa0404d841ad75435	0.94566
82e4b4a214f2418f9f684f6e28464431	696fcd39d96eaa84510ddbb3e00d8263	0.94566
82e4b4a214f2418f9f684f6e28464431	8bd33e664b9a859086f52c1737c36339	0.94566
82e4b4a214f2418f9f684f6e28464431	5d0fee9c66e12c632ee634131979c10c	0.94566
82e4b4a214f2418f9f684f6e28464431	337145739bb153cea3d3c53595acbf22	0.94566
82e4b4a214f2418f9f684f6e28464431	0f407bb44ce651722dc620d0f9490b63	0.94566
82e4b4a214f2418f9f684f6e28464431	afede6d9aa8210bc3d25c9253a7a4f84	0.94566
82e4b4a214f2418f9f684f6e28464431	4cdf9aeb68a51fc2fff2f82e2e682c5b	0.94566
82e4b4a214f2418f9f684f6e28464431	79b7674106bc3fb9eccf73c5bd64bfb5	0.94566
82e4b4a214f2418f9f684f6e28464431	a3ce2b76a5b2daccdcc5c58ee218896a	0.94566
82e4b4a214f2418f9f684f6e28464431	aa13b33f5e1937ef92b901d75f190fbe	0.94566
82e4b4a214f2418f9f684f6e28464431	6b8146cb68c2d5021bd95561bfc0e7ee	0.94566
82e4b4a214f2418f9f684f6e28464431	4975e9498ed5c0822a2f200287a6c612	0.94566
82e4b4a214f2418f9f684f6e28464431	6d17ed796a25ea35dc19e67c30960976	0.94566
82e4b4a214f2418f9f684f6e28464431	20dd251ae02aea592d801d239b63f9e4	0.94566
82e4b4a214f2418f9f684f6e28464431	55ba03929d537e43f91aa98c36421f34	0.94566
733e7d6a3db4d4a5ec59f162c56f4f2f	3ceb758c49920cee71fe6e65c3493a43	0.94566
733e7d6a3db4d4a5ec59f162c56f4f2f	eb32459bd42821aedd3001b8cfbb676e	0.94566
733e7d6a3db4d4a5ec59f162c56f4f2f	08aeba14cd002cb375f0f880423b0373	0.94566
733e7d6a3db4d4a5ec59f162c56f4f2f	b6be254413a7e7d160e6ca9101729245	0.94566
733e7d6a3db4d4a5ec59f162c56f4f2f	9b03b9f9eb72fe49be3d2e4ee544f849	0.94566
733e7d6a3db4d4a5ec59f162c56f4f2f	6916815c0ac8c809f4feffb4f33fa465	0.94566
733e7d6a3db4d4a5ec59f162c56f4f2f	90a3648550c58dac0d8a380eeeb8cf17	0.94566
733e7d6a3db4d4a5ec59f162c56f4f2f	02e5fcb493c97a6162bc6ed94e037aac	0.94566
733e7d6a3db4d4a5ec59f162c56f4f2f	34b68b1ef916cbbfcf7e587bb154452d	0.94566
733e7d6a3db4d4a5ec59f162c56f4f2f	2652f19ead90e82ed89bbfd4143f6b0c	0.94566
733e7d6a3db4d4a5ec59f162c56f4f2f	96a9773aa46a3d58007f76fad394d5f4	0.94566
0a967780321add1ec3dc358acb17b3ff	33ec2672acc39980a0e805c26d08cb79	0.94566
0a967780321add1ec3dc358acb17b3ff	fbe36876d118508cf7e4fb67cbc032e2	0.94566
0a967780321add1ec3dc358acb17b3ff	4e7254e7faee92f9868759c556ed73ae	0.94566
0a967780321add1ec3dc358acb17b3ff	99847a0aad4c578374c41bae937991b6	0.94566
0a967780321add1ec3dc358acb17b3ff	265f93f99468f9605a5031488c920eb1	0.94566
0a967780321add1ec3dc358acb17b3ff	7233e4cdaface6927d43773c964f94e4	0.94566
0a967780321add1ec3dc358acb17b3ff	8a13f20e0e4548413b745bf51c9980b3	0.94566
0a967780321add1ec3dc358acb17b3ff	58b68525f7a335fdba75a3ce75720e07	0.94566
0a967780321add1ec3dc358acb17b3ff	cf128de805981908ffc28e6be7a5f7e8	0.94566
0a967780321add1ec3dc358acb17b3ff	c4b50715602cceccd5ba14916e71bbbb	0.94566
0a967780321add1ec3dc358acb17b3ff	8c357abf174733947c627dde698d3f93	0.94566
3ceb758c49920cee71fe6e65c3493a43	eb32459bd42821aedd3001b8cfbb676e	0.94566
3ceb758c49920cee71fe6e65c3493a43	08aeba14cd002cb375f0f880423b0373	0.94566
3ceb758c49920cee71fe6e65c3493a43	b6be254413a7e7d160e6ca9101729245	0.94566
3ceb758c49920cee71fe6e65c3493a43	9b03b9f9eb72fe49be3d2e4ee544f849	0.94566
3ceb758c49920cee71fe6e65c3493a43	baaac2b84af41b8a30bd36a3ce0afdf6	0.94566
3ceb758c49920cee71fe6e65c3493a43	6dd57d68807306a85a30f15e758134d4	0.94566
3ceb758c49920cee71fe6e65c3493a43	6916815c0ac8c809f4feffb4f33fa465	0.94566
3ceb758c49920cee71fe6e65c3493a43	eb56533502639959923e46d4d4ce2d36	0.94566
3ceb758c49920cee71fe6e65c3493a43	02e5fcb493c97a6162bc6ed94e037aac	0.94566
3ceb758c49920cee71fe6e65c3493a43	34b68b1ef916cbbfcf7e587bb154452d	0.94566
3ceb758c49920cee71fe6e65c3493a43	63bf8d81940fc455b5cc541cc7a660bb	0.94566
3ceb758c49920cee71fe6e65c3493a43	2652f19ead90e82ed89bbfd4143f6b0c	0.94566
5a6ac5dc72f33d90bc3e9891f2564f84	da8260f3fd39c10fa491e191f903c14e	0.94566
5a6ac5dc72f33d90bc3e9891f2564f84	675f47f52ab28cdcf30e23836997082e	0.94566
5a6ac5dc72f33d90bc3e9891f2564f84	7f02f8891c18a78c1ca3b37b4aa5ee79	0.94566
9c941d1bd9eaa2157cf519e2fc7d1aed	0166ac0863837f3e87a4a75afd9e7ddf	0.94566
9c941d1bd9eaa2157cf519e2fc7d1aed	6916d97494489296801671b8d18a0309	0.94566
9c941d1bd9eaa2157cf519e2fc7d1aed	b42fc99cbb9150042fb31318bd88b12c	0.94566
9c941d1bd9eaa2157cf519e2fc7d1aed	9efb69f287a7f7fffdc3ba17b646628f	0.94566
9c941d1bd9eaa2157cf519e2fc7d1aed	0b04a06598d5b5b3f758c73cb8792ab9	0.94566
5656b737706ec07029a2669e0c1f904b	1040ffc55a036894e9ec2cbe47802e07	0.94566
bee6c2d572a23973ad932f48649b4e8c	1c926ca8fd259c89ece07dfe79c62dfa	0.94566
bee6c2d572a23973ad932f48649b4e8c	45ce9f54d9768cda11c5fd16fb7376f9	0.94566
bee6c2d572a23973ad932f48649b4e8c	1ee948b5ef1c4af93bce919fe1350f59	0.94566
bee6c2d572a23973ad932f48649b4e8c	fbba10bc26152630ec70583c4fb41d7d	0.94566
4d87d614337faa60df423f918a0978b3	a3ce2b76a5b2daccdcc5c58ee218896a	0.94566
cc8866f3920c1a4759b779a2afe615fa	e543abb5f12c23a50072118b9454f001	0.94566
6914f32d9ee2679f7f74b6d5f8f1e9e7	a9fe2fa970bc4b6487df11daf151ee81	0.94566
6914f32d9ee2679f7f74b6d5f8f1e9e7	93b2cb19723f915a805a4cd20f594f07	0.94566
6914f32d9ee2679f7f74b6d5f8f1e9e7	eda6f9881bff8aea35a15d26cc534efd	0.94566
6914f32d9ee2679f7f74b6d5f8f1e9e7	22f26cc2c7277df74d59aa1f5adb05e4	0.94566
6914f32d9ee2679f7f74b6d5f8f1e9e7	cefbbaabbe2748b243095e71e7b86265	0.94566
6914f32d9ee2679f7f74b6d5f8f1e9e7	801463e61abcfcc2938e84e16c3929d6	0.94566
6914f32d9ee2679f7f74b6d5f8f1e9e7	a1219c3e384b263c96f09ff1f1cea107	0.94566
6914f32d9ee2679f7f74b6d5f8f1e9e7	f6608e71c06674d8840e9cb8ccb2e74d	0.94566
6914f32d9ee2679f7f74b6d5f8f1e9e7	bdb19eb6ef13bfed15a7ebb821a6d403	0.94566
6914f32d9ee2679f7f74b6d5f8f1e9e7	9d510a1ee7233ab15bca064515917a04	0.94566
b02cb547b80f488db8e691c9a562f264	e6f36661db6fbcff3ccc39aa0a823810	0.94566
b02cb547b80f488db8e691c9a562f264	94e10c92d744617d9880b78eef11a2c6	0.94566
b02cb547b80f488db8e691c9a562f264	7ee887337d29a3cd41f4648bbd1ef6ba	0.94566
1e3a2aad4f8f247c7245ee7836ba20bd	93b2cb19723f915a805a4cd20f594f07	0.94566
1e3a2aad4f8f247c7245ee7836ba20bd	f77e657f16617d6eefe6c409ead568e8	0.94566
1e3a2aad4f8f247c7245ee7836ba20bd	94e10c92d744617d9880b78eef11a2c6	0.94566
1e3a2aad4f8f247c7245ee7836ba20bd	7fd5a794906d83f5fc04700094b52f38	0.94566
1e3a2aad4f8f247c7245ee7836ba20bd	b70898de946a803c963584e6b7b27bea	0.94566
1e3a2aad4f8f247c7245ee7836ba20bd	51262c0e7e875ebe8e03cf077ac177c5	0.94566
1e3a2aad4f8f247c7245ee7836ba20bd	f5894077625c801e89b4365be5964095	0.94566
1e3a2aad4f8f247c7245ee7836ba20bd	4ec07abdb860bda723972447dfa55ddc	0.94566
1e3a2aad4f8f247c7245ee7836ba20bd	ccedbacba71f5225e8911acbd4552b5d	0.94566
1e3a2aad4f8f247c7245ee7836ba20bd	3fc31391229b05e4b66e7950f1548840	0.94566
1e3a2aad4f8f247c7245ee7836ba20bd	9fc85a26ba4e62372a0510e76a6e616b	0.94566
1e3a2aad4f8f247c7245ee7836ba20bd	6b8146cb68c2d5021bd95561bfc0e7ee	0.94566
1e3a2aad4f8f247c7245ee7836ba20bd	1b6b519d3d862ee5aa5f5fb031cbedd7	0.94566
1e3a2aad4f8f247c7245ee7836ba20bd	65cfe8b097fd708eaba653545f8f8e69	0.94566
1e3a2aad4f8f247c7245ee7836ba20bd	8c357abf174733947c627dde698d3f93	0.94566
1c926ca8fd259c89ece07dfe79c62dfa	2263acc68242b53cdc14a7ca1fccd018	0.94566
1c926ca8fd259c89ece07dfe79c62dfa	45ce9f54d9768cda11c5fd16fb7376f9	0.94566
1c926ca8fd259c89ece07dfe79c62dfa	1ee948b5ef1c4af93bce919fe1350f59	0.94566
1c926ca8fd259c89ece07dfe79c62dfa	4626abe1b3958f24002d1d38b7e8ac91	0.94566
1c926ca8fd259c89ece07dfe79c62dfa	db479043d01c7c0f52d725110a613bdc	0.94566
1c926ca8fd259c89ece07dfe79c62dfa	ab13b942cfeed744362c9214b1c659ba	0.94566
1c926ca8fd259c89ece07dfe79c62dfa	fbba10bc26152630ec70583c4fb41d7d	0.94566
a9fe2fa970bc4b6487df11daf151ee81	93b2cb19723f915a805a4cd20f594f07	0.94566
a9fe2fa970bc4b6487df11daf151ee81	eda6f9881bff8aea35a15d26cc534efd	0.94566
a9fe2fa970bc4b6487df11daf151ee81	22f26cc2c7277df74d59aa1f5adb05e4	0.94566
a9fe2fa970bc4b6487df11daf151ee81	cefbbaabbe2748b243095e71e7b86265	0.94566
a9fe2fa970bc4b6487df11daf151ee81	801463e61abcfcc2938e84e16c3929d6	0.94566
a9fe2fa970bc4b6487df11daf151ee81	e4db4b69f4dcb92e21a950f284ec8b75	0.94566
a9fe2fa970bc4b6487df11daf151ee81	a1219c3e384b263c96f09ff1f1cea107	0.94566
a9fe2fa970bc4b6487df11daf151ee81	f6608e71c06674d8840e9cb8ccb2e74d	0.94566
a9fe2fa970bc4b6487df11daf151ee81	bdb19eb6ef13bfed15a7ebb821a6d403	0.94566
a9fe2fa970bc4b6487df11daf151ee81	37f45f705bfc321df25ab0c8063a9618	0.94566
a9fe2fa970bc4b6487df11daf151ee81	9d510a1ee7233ab15bca064515917a04	0.94566
0f02ff7fd08fac168e40a173832ebc36	c0086f50c449526558dcbb7fd569043f	0.94566
0f02ff7fd08fac168e40a173832ebc36	4edec3e2a4504a62bdc1387a9f7bcc26	0.94566
8f9f1aae9646df33f47a6cf3fe8e9739	1438af8d3f304470c4aee3d93544521e	0.94566
8f9f1aae9646df33f47a6cf3fe8e9739	e39b0a8cf183344fae62c2e14a46a910	0.94566
8f9f1aae9646df33f47a6cf3fe8e9739	c22273f574a6358a8544884020f7a822	0.94566
8f9f1aae9646df33f47a6cf3fe8e9739	59702671fe9c6d0fafd8225d1f68bd1f	0.94566
8f9f1aae9646df33f47a6cf3fe8e9739	ac2662d36a91cba0d6b8fee15d75ead0	0.94566
8f9f1aae9646df33f47a6cf3fe8e9739	39e70d892a1b487e00ae81b7b70491af	0.94566
fe7524c7b9627fef8d04e09255ab2434	8784c48f2e25f83675c16a766ef0a315	0.94566
556c737693b8da58d2dddbdf145583a7	a4f9aa3109031f2e031f8db7f91cd28a	0.94566
556c737693b8da58d2dddbdf145583a7	df5a861dbf82d100812defe4b06ce542	0.94566
f663b8bf5da90a50a54540d696f1a8a4	7fc0ccbd86b09190f44369a934b3456c	0.94566
f663b8bf5da90a50a54540d696f1a8a4	0f407bb44ce651722dc620d0f9490b63	0.94566
d9b7d98120e626b2f0f10e3febe8682c	ec9285bc70461b117d8a562a8ecc6779	0.94566
d9b7d98120e626b2f0f10e3febe8682c	3548d70f9eb776a4c51d2f64abc3f1a1	0.94566
d9b7d98120e626b2f0f10e3febe8682c	4ec07abdb860bda723972447dfa55ddc	0.94566
e5842c9c88530748259c56a35e84fb9a	eb32459bd42821aedd3001b8cfbb676e	0.94566
e5842c9c88530748259c56a35e84fb9a	5135b86f37750dfe66b4941dbb4cf998	0.94566
e5842c9c88530748259c56a35e84fb9a	7eab0a327e61cde847742596712dcadb	0.94566
e5842c9c88530748259c56a35e84fb9a	e8ead60320c81b952c5a45aa67271a48	0.94566
e6f36661db6fbcff3ccc39aa0a823810	94e10c92d744617d9880b78eef11a2c6	0.94566
e6f36661db6fbcff3ccc39aa0a823810	8a13f20e0e4548413b745bf51c9980b3	0.94566
e6f36661db6fbcff3ccc39aa0a823810	f2816e09b5444945d9cb7c5c801d427d	0.94566
306efcbd2c4bfb204f5edc78a3770079	16bf085946684ed5fe695352fdaa04bd	0.94566
306efcbd2c4bfb204f5edc78a3770079	6b1ddc9b1fd57fc4171262a1c09d2c1e	0.94566
306efcbd2c4bfb204f5edc78a3770079	9e8523807c59f3603834a25cbcd86494	0.94566
79b035a12b3b42cfb548824c6bdc72a4	7ba3d25c1364399fcd59076c4d90732b	0.94566
79b035a12b3b42cfb548824c6bdc72a4	790e976dfd7c72094f38aee1b759d212	0.94566
79b035a12b3b42cfb548824c6bdc72a4	9f694ae065fcfcf17a298da89935a0c7	0.94566
79b035a12b3b42cfb548824c6bdc72a4	e39b0a8cf183344fae62c2e14a46a910	0.94566
79b035a12b3b42cfb548824c6bdc72a4	27153535b92b8bd0d59aeee8456e91ca	0.94566
79b035a12b3b42cfb548824c6bdc72a4	5f042513c67fdd55888051594cb486ac	0.94566
79b035a12b3b42cfb548824c6bdc72a4	6c553b44e9fd5caef365f5ea41f4d6f3	0.94566
93b2cb19723f915a805a4cd20f594f07	eda6f9881bff8aea35a15d26cc534efd	0.94566
93b2cb19723f915a805a4cd20f594f07	cefbbaabbe2748b243095e71e7b86265	0.94566
93b2cb19723f915a805a4cd20f594f07	801463e61abcfcc2938e84e16c3929d6	0.94566
93b2cb19723f915a805a4cd20f594f07	e4db4b69f4dcb92e21a950f284ec8b75	0.94566
93b2cb19723f915a805a4cd20f594f07	a1219c3e384b263c96f09ff1f1cea107	0.94566
93b2cb19723f915a805a4cd20f594f07	f77e657f16617d6eefe6c409ead568e8	0.94566
93b2cb19723f915a805a4cd20f594f07	94e10c92d744617d9880b78eef11a2c6	0.94566
93b2cb19723f915a805a4cd20f594f07	f6608e71c06674d8840e9cb8ccb2e74d	0.94566
93b2cb19723f915a805a4cd20f594f07	bdb19eb6ef13bfed15a7ebb821a6d403	0.94566
93b2cb19723f915a805a4cd20f594f07	7fd5a794906d83f5fc04700094b52f38	0.94566
93b2cb19723f915a805a4cd20f594f07	b70898de946a803c963584e6b7b27bea	0.94566
93b2cb19723f915a805a4cd20f594f07	51262c0e7e875ebe8e03cf077ac177c5	0.94566
93b2cb19723f915a805a4cd20f594f07	9d510a1ee7233ab15bca064515917a04	0.94566
93b2cb19723f915a805a4cd20f594f07	f5894077625c801e89b4365be5964095	0.94566
93b2cb19723f915a805a4cd20f594f07	4ec07abdb860bda723972447dfa55ddc	0.94566
93b2cb19723f915a805a4cd20f594f07	3fc31391229b05e4b66e7950f1548840	0.94566
93b2cb19723f915a805a4cd20f594f07	9fc85a26ba4e62372a0510e76a6e616b	0.94566
93b2cb19723f915a805a4cd20f594f07	6b8146cb68c2d5021bd95561bfc0e7ee	0.94566
93b2cb19723f915a805a4cd20f594f07	1b6b519d3d862ee5aa5f5fb031cbedd7	0.94566
93b2cb19723f915a805a4cd20f594f07	65cfe8b097fd708eaba653545f8f8e69	0.94566
93b2cb19723f915a805a4cd20f594f07	8c357abf174733947c627dde698d3f93	0.94566
8784c48f2e25f83675c16a766ef0a315	4edec3e2a4504a62bdc1387a9f7bcc26	0.94566
16bf085946684ed5fe695352fdaa04bd	bce23b9b289bb43bff25cd148f080557	0.94566
16bf085946684ed5fe695352fdaa04bd	68b6f352877ccbaddbc5ebbdcd2c87a4	0.94566
16bf085946684ed5fe695352fdaa04bd	afede6d9aa8210bc3d25c9253a7a4f84	0.94566
16bf085946684ed5fe695352fdaa04bd	522f072a3e8ca88b8f8bdecea04465d9	0.94566
16bf085946684ed5fe695352fdaa04bd	3f1304fc1b0de80cad541bdcff9676a5	0.94566
7fc0ccbd86b09190f44369a934b3456c	801b3393e0a3890bcce4fa4681e31ea9	0.94566
7fc0ccbd86b09190f44369a934b3456c	e131d6b9e4f997788460a450a69c3a99	0.94566
7fc0ccbd86b09190f44369a934b3456c	0f407bb44ce651722dc620d0f9490b63	0.94566
7fc0ccbd86b09190f44369a934b3456c	b092f7f3425cc2dfc9965117ab63717d	0.94566
67f59db4c23e06a8484ab88a3e520323	5610f9fd4d05131f3274383ca5be7ed2	0.94566
67f59db4c23e06a8484ab88a3e520323	7c762c36ae20866e1998a696f50f9716	0.94566
67f59db4c23e06a8484ab88a3e520323	0315be37f6165f1e87335603ad7d63e9	0.94566
67f59db4c23e06a8484ab88a3e520323	3437f453277efee108b6338b65ec716d	0.94566
67f59db4c23e06a8484ab88a3e520323	c57eee14afd7a19174edd5b241350a02	0.94566
5610f9fd4d05131f3274383ca5be7ed2	7c762c36ae20866e1998a696f50f9716	0.94566
5610f9fd4d05131f3274383ca5be7ed2	f1bb935fa8a308892ff011e7813dfc5c	0.94566
5610f9fd4d05131f3274383ca5be7ed2	14525301bb4271314d10e75fe308a602	0.94566
5610f9fd4d05131f3274383ca5be7ed2	0915263f5f4c5ca4e656773ecaeddd7a	0.94566
5610f9fd4d05131f3274383ca5be7ed2	0315be37f6165f1e87335603ad7d63e9	0.94566
5610f9fd4d05131f3274383ca5be7ed2	3437f453277efee108b6338b65ec716d	0.94566
5610f9fd4d05131f3274383ca5be7ed2	cd98632699c5f92b428dd2337fc27563	0.94566
5610f9fd4d05131f3274383ca5be7ed2	c57eee14afd7a19174edd5b241350a02	0.94566
5610f9fd4d05131f3274383ca5be7ed2	56f9c987896664bf30b7df45f17c2c30	0.94566
2ffc32fd670446fa2a95b2209aaf1a9a	7b1896181def8abf5ada238339bed916	0.94566
2ffc32fd670446fa2a95b2209aaf1a9a	d6165e0582a03dd12b473c294cdd3bcd	0.94566
2ffc32fd670446fa2a95b2209aaf1a9a	d8783ee923cd85c2a36a867210303e03	0.94566
2ffc32fd670446fa2a95b2209aaf1a9a	84e422b114928ef1d913b13075ca5903	0.94566
2ffc32fd670446fa2a95b2209aaf1a9a	8080b535f4bf339a8d5fee285ddab60b	0.94566
2ffc32fd670446fa2a95b2209aaf1a9a	741de23dfdfb60ee191b1bf3fb3e60e7	0.94566
2ffc32fd670446fa2a95b2209aaf1a9a	b07a379d1b16d945fac249328c0fc3d4	0.94566
2ffc32fd670446fa2a95b2209aaf1a9a	9e8523807c59f3603834a25cbcd86494	0.94566
2ffc32fd670446fa2a95b2209aaf1a9a	0342f30ab678cb75dc7d44eb6d1f3c71	0.94566
2263acc68242b53cdc14a7ca1fccd018	10ca86dccfe1472117a0599a1f4f1635	0.94566
2263acc68242b53cdc14a7ca1fccd018	4626abe1b3958f24002d1d38b7e8ac91	0.94566
2263acc68242b53cdc14a7ca1fccd018	db479043d01c7c0f52d725110a613bdc	0.94566
2263acc68242b53cdc14a7ca1fccd018	ab13b942cfeed744362c9214b1c659ba	0.94566
2263acc68242b53cdc14a7ca1fccd018	759ac655001806785218ecfb18b06a1d	0.94566
2263acc68242b53cdc14a7ca1fccd018	96c5f928b96ff41ecf26e1e13259fa64	0.94566
2263acc68242b53cdc14a7ca1fccd018	a018dfb928f901a2fbc3ee62c0e7362b	0.94566
2263acc68242b53cdc14a7ca1fccd018	788c4775dc4bc276f0e7890372a3d758	0.94566
7b1896181def8abf5ada238339bed916	d6165e0582a03dd12b473c294cdd3bcd	0.94566
7b1896181def8abf5ada238339bed916	d8783ee923cd85c2a36a867210303e03	0.94566
7b1896181def8abf5ada238339bed916	84e422b114928ef1d913b13075ca5903	0.94566
7b1896181def8abf5ada238339bed916	8080b535f4bf339a8d5fee285ddab60b	0.94566
7b1896181def8abf5ada238339bed916	b07a379d1b16d945fac249328c0fc3d4	0.94566
7b1896181def8abf5ada238339bed916	9e8523807c59f3603834a25cbcd86494	0.94566
7b1896181def8abf5ada238339bed916	0342f30ab678cb75dc7d44eb6d1f3c71	0.94566
1040ffc55a036894e9ec2cbe47802e07	05734150853338b5e489721794a7c826	0.94566
1040ffc55a036894e9ec2cbe47802e07	60da738bc4b046c5c5c7b22f77832a90	0.94566
1040ffc55a036894e9ec2cbe47802e07	441b997bec002a7fe05e0ad7e4bfc14e	0.94566
1040ffc55a036894e9ec2cbe47802e07	da17572657f5636c66a5ce8c2d04922f	0.94566
1040ffc55a036894e9ec2cbe47802e07	b34fb0904caa8c1db6df0f5cb24da6b2	0.94566
1040ffc55a036894e9ec2cbe47802e07	64bcf94b568e9cbaa0404d841ad75435	0.94566
1040ffc55a036894e9ec2cbe47802e07	696fcd39d96eaa84510ddbb3e00d8263	0.94566
1040ffc55a036894e9ec2cbe47802e07	8bd33e664b9a859086f52c1737c36339	0.94566
1040ffc55a036894e9ec2cbe47802e07	5d0fee9c66e12c632ee634131979c10c	0.94566
1040ffc55a036894e9ec2cbe47802e07	337145739bb153cea3d3c53595acbf22	0.94566
1040ffc55a036894e9ec2cbe47802e07	0f407bb44ce651722dc620d0f9490b63	0.94566
1040ffc55a036894e9ec2cbe47802e07	afede6d9aa8210bc3d25c9253a7a4f84	0.94566
1040ffc55a036894e9ec2cbe47802e07	4cdf9aeb68a51fc2fff2f82e2e682c5b	0.94566
1040ffc55a036894e9ec2cbe47802e07	79b7674106bc3fb9eccf73c5bd64bfb5	0.94566
1040ffc55a036894e9ec2cbe47802e07	a3ce2b76a5b2daccdcc5c58ee218896a	0.94566
1040ffc55a036894e9ec2cbe47802e07	aa13b33f5e1937ef92b901d75f190fbe	0.94566
1040ffc55a036894e9ec2cbe47802e07	6b8146cb68c2d5021bd95561bfc0e7ee	0.94566
1040ffc55a036894e9ec2cbe47802e07	4975e9498ed5c0822a2f200287a6c612	0.94566
1040ffc55a036894e9ec2cbe47802e07	6d17ed796a25ea35dc19e67c30960976	0.94566
1040ffc55a036894e9ec2cbe47802e07	20dd251ae02aea592d801d239b63f9e4	0.94566
1040ffc55a036894e9ec2cbe47802e07	55ba03929d537e43f91aa98c36421f34	0.94566
e5000feada22d584f2b1ef717d1f1b1d	05d8c38aa39c708e6f1f4f29ee655f38	0.94566
e5000feada22d584f2b1ef717d1f1b1d	58b68525f7a335fdba75a3ce75720e07	0.94566
5e6553c89aa09df554730e0e0dcddff2	5becdcb4c3c8cfac25525c0b7e4ff555	0.94566
5e6553c89aa09df554730e0e0dcddff2	8d2788d498bc6528a24e66350380fb78	0.94566
5e6553c89aa09df554730e0e0dcddff2	55814a4ea8a202d9b328c7b68584bf90	0.94566
5e6553c89aa09df554730e0e0dcddff2	a824b066eb0b77c728cfab213da2e002	0.94566
5e6553c89aa09df554730e0e0dcddff2	2652f19ead90e82ed89bbfd4143f6b0c	0.94566
5e6553c89aa09df554730e0e0dcddff2	878ac7527f7fdf86178eaa89ab6398fe	0.94566
5e6553c89aa09df554730e0e0dcddff2	70c3da9a368397a37246d8dcdf38f4cb	0.94566
a4f9aa3109031f2e031f8db7f91cd28a	df5a861dbf82d100812defe4b06ce542	0.94566
d05ccd98167a72d13ec85a2e81c2da06	5becdcb4c3c8cfac25525c0b7e4ff555	0.94566
d05ccd98167a72d13ec85a2e81c2da06	519d9f87c7b9684dab0bac9e872e50bb	0.94566
d05ccd98167a72d13ec85a2e81c2da06	63bf8d81940fc455b5cc541cc7a660bb	0.94566
5100343c1e946364d20e495e3e209bc6	5511d7e46c7812c750470a3d28c32f4d	0.94566
5100343c1e946364d20e495e3e209bc6	0f6006dc9edddee73c4e03a918c3aa66	0.94566
5100343c1e946364d20e495e3e209bc6	fa493aa4f1faf6be9820d19f83cdd969	0.94566
8e0853ccd09522a3a8c2742a374fab62	eda6f9881bff8aea35a15d26cc534efd	0.94566
8e0853ccd09522a3a8c2742a374fab62	0166ac0863837f3e87a4a75afd9e7ddf	0.94566
8e0853ccd09522a3a8c2742a374fab62	05ee809c46ccca3097f50d1123609e5a	0.94566
8e0853ccd09522a3a8c2742a374fab62	9b1e92389ef0cc5317353e8ea8426a70	0.94566
8e0853ccd09522a3a8c2742a374fab62	c1b64e9ee44cded7174eb92430f7ac95	0.94566
8e0853ccd09522a3a8c2742a374fab62	d9db432ac0d299dffcadd359c0e7120b	0.94566
8e0853ccd09522a3a8c2742a374fab62	675f47f52ab28cdcf30e23836997082e	0.94566
8e0853ccd09522a3a8c2742a374fab62	55ba03929d537e43f91aa98c36421f34	0.94566
eb32459bd42821aedd3001b8cfbb676e	08aeba14cd002cb375f0f880423b0373	0.94566
eb32459bd42821aedd3001b8cfbb676e	5135b86f37750dfe66b4941dbb4cf998	0.94566
eb32459bd42821aedd3001b8cfbb676e	b6be254413a7e7d160e6ca9101729245	0.94566
eb32459bd42821aedd3001b8cfbb676e	9c94712b0ac128883aeed3cf0cd696c7	0.94566
eb32459bd42821aedd3001b8cfbb676e	7eab0a327e61cde847742596712dcadb	0.94566
eb32459bd42821aedd3001b8cfbb676e	6916815c0ac8c809f4feffb4f33fa465	0.94566
eb32459bd42821aedd3001b8cfbb676e	90a3648550c58dac0d8a380eeeb8cf17	0.94566
eb32459bd42821aedd3001b8cfbb676e	02e5fcb493c97a6162bc6ed94e037aac	0.94566
eb32459bd42821aedd3001b8cfbb676e	34b68b1ef916cbbfcf7e587bb154452d	0.94566
eb32459bd42821aedd3001b8cfbb676e	e8ead60320c81b952c5a45aa67271a48	0.94566
eb32459bd42821aedd3001b8cfbb676e	2652f19ead90e82ed89bbfd4143f6b0c	0.94566
eb32459bd42821aedd3001b8cfbb676e	96a9773aa46a3d58007f76fad394d5f4	0.94566
5511d7e46c7812c750470a3d28c32f4d	790e976dfd7c72094f38aee1b759d212	0.94566
5511d7e46c7812c750470a3d28c32f4d	8d2788d498bc6528a24e66350380fb78	0.94566
5511d7e46c7812c750470a3d28c32f4d	55814a4ea8a202d9b328c7b68584bf90	0.94566
5511d7e46c7812c750470a3d28c32f4d	d56d487973829be6bedf092e2fc3b90e	0.94566
5511d7e46c7812c750470a3d28c32f4d	60da738bc4b046c5c5c7b22f77832a90	0.94566
5511d7e46c7812c750470a3d28c32f4d	0a7cff6daea23145cea146dfb78df6df	0.94566
5511d7e46c7812c750470a3d28c32f4d	6916d97494489296801671b8d18a0309	0.94566
5511d7e46c7812c750470a3d28c32f4d	e131d6b9e4f997788460a450a69c3a99	0.94566
5511d7e46c7812c750470a3d28c32f4d	5f042513c67fdd55888051594cb486ac	0.94566
5511d7e46c7812c750470a3d28c32f4d	8c68c8f1ca3ceb58bd95ff2e2f7444af	0.94566
5511d7e46c7812c750470a3d28c32f4d	b092f7f3425cc2dfc9965117ab63717d	0.94566
5511d7e46c7812c750470a3d28c32f4d	49c1ac3db0834e9040ad888443339e6f	0.94566
5511d7e46c7812c750470a3d28c32f4d	0b04a06598d5b5b3f758c73cb8792ab9	0.94566
5511d7e46c7812c750470a3d28c32f4d	20dd251ae02aea592d801d239b63f9e4	0.94566
5511d7e46c7812c750470a3d28c32f4d	3a9208d106ad373e9d8528bbe6b9c5ad	0.94566
7ba3d25c1364399fcd59076c4d90732b	66c5253c6d7fc739b2d882966842f805	0.94566
7ba3d25c1364399fcd59076c4d90732b	790e976dfd7c72094f38aee1b759d212	0.94566
7ba3d25c1364399fcd59076c4d90732b	9f694ae065fcfcf17a298da89935a0c7	0.94566
7ba3d25c1364399fcd59076c4d90732b	c6eecb8a5f4550768cfd4d4a4723c636	0.94566
7ba3d25c1364399fcd59076c4d90732b	d239e96a3f1ad1ebf4ed9aee42656456	0.94566
7ba3d25c1364399fcd59076c4d90732b	3b3bbab9ab17d53dd61ce47bd1aef746	0.94566
7ba3d25c1364399fcd59076c4d90732b	5f042513c67fdd55888051594cb486ac	0.94566
7ba3d25c1364399fcd59076c4d90732b	a018dfb928f901a2fbc3ee62c0e7362b	0.94566
7ba3d25c1364399fcd59076c4d90732b	6c553b44e9fd5caef365f5ea41f4d6f3	0.94566
5becdcb4c3c8cfac25525c0b7e4ff555	8d2788d498bc6528a24e66350380fb78	0.94566
5becdcb4c3c8cfac25525c0b7e4ff555	55814a4ea8a202d9b328c7b68584bf90	0.94566
5becdcb4c3c8cfac25525c0b7e4ff555	63bf8d81940fc455b5cc541cc7a660bb	0.94566
5becdcb4c3c8cfac25525c0b7e4ff555	a824b066eb0b77c728cfab213da2e002	0.94566
5becdcb4c3c8cfac25525c0b7e4ff555	2652f19ead90e82ed89bbfd4143f6b0c	0.94566
5becdcb4c3c8cfac25525c0b7e4ff555	878ac7527f7fdf86178eaa89ab6398fe	0.94566
5becdcb4c3c8cfac25525c0b7e4ff555	70c3da9a368397a37246d8dcdf38f4cb	0.94566
d1c3545aa01f01c148c8b11eef74200b	d8783ee923cd85c2a36a867210303e03	0.94566
d1c3545aa01f01c148c8b11eef74200b	cefbbaabbe2748b243095e71e7b86265	0.94566
d1c3545aa01f01c148c8b11eef74200b	736281d70ec672edc46ef1986b47e1a9	0.94566
d1c3545aa01f01c148c8b11eef74200b	69916a1cde832bb15ac5acc0ef5e3518	0.94566
7c762c36ae20866e1998a696f50f9716	f1bb935fa8a308892ff011e7813dfc5c	0.94566
7c762c36ae20866e1998a696f50f9716	14525301bb4271314d10e75fe308a602	0.94566
7c762c36ae20866e1998a696f50f9716	736281d70ec672edc46ef1986b47e1a9	0.94566
7c762c36ae20866e1998a696f50f9716	bce23b9b289bb43bff25cd148f080557	0.94566
7c762c36ae20866e1998a696f50f9716	0315be37f6165f1e87335603ad7d63e9	0.94566
7c762c36ae20866e1998a696f50f9716	3437f453277efee108b6338b65ec716d	0.94566
7c762c36ae20866e1998a696f50f9716	bc61c16683aa91f4a47a2266993a69d1	0.94566
7c762c36ae20866e1998a696f50f9716	cd98632699c5f92b428dd2337fc27563	0.94566
7c762c36ae20866e1998a696f50f9716	fcb732848a3d018dde12adafdf5fa5f9	0.94566
7c762c36ae20866e1998a696f50f9716	c57eee14afd7a19174edd5b241350a02	0.94566
7c762c36ae20866e1998a696f50f9716	3f1304fc1b0de80cad541bdcff9676a5	0.94566
7c762c36ae20866e1998a696f50f9716	56f9c987896664bf30b7df45f17c2c30	0.94566
76d2032108822bcfaa90a4873f7a51aa	624331d46eb13cb2bafe7e8a846c0bdc	0.94566
76d2032108822bcfaa90a4873f7a51aa	69916a1cde832bb15ac5acc0ef5e3518	0.94566
eb7ad7504f3a8f3dfa3361a19fc14984	dffe8a7b6f5c4f32a70cf6caa6c988c8	0.94566
d741fb51a419da5d9265233ce7d677d4	4cc87bf12585f95f9a1de927168e045a	0.94566
d6165e0582a03dd12b473c294cdd3bcd	d8783ee923cd85c2a36a867210303e03	0.94566
d6165e0582a03dd12b473c294cdd3bcd	84e422b114928ef1d913b13075ca5903	0.94566
d6165e0582a03dd12b473c294cdd3bcd	759ac655001806785218ecfb18b06a1d	0.94566
d6165e0582a03dd12b473c294cdd3bcd	b07a379d1b16d945fac249328c0fc3d4	0.94566
d6165e0582a03dd12b473c294cdd3bcd	9e8523807c59f3603834a25cbcd86494	0.94566
d6165e0582a03dd12b473c294cdd3bcd	0342f30ab678cb75dc7d44eb6d1f3c71	0.94566
08aeba14cd002cb375f0f880423b0373	b6be254413a7e7d160e6ca9101729245	0.94566
08aeba14cd002cb375f0f880423b0373	9b03b9f9eb72fe49be3d2e4ee544f849	0.94566
08aeba14cd002cb375f0f880423b0373	6916815c0ac8c809f4feffb4f33fa465	0.94566
08aeba14cd002cb375f0f880423b0373	02e5fcb493c97a6162bc6ed94e037aac	0.94566
08aeba14cd002cb375f0f880423b0373	34b68b1ef916cbbfcf7e587bb154452d	0.94566
08aeba14cd002cb375f0f880423b0373	2652f19ead90e82ed89bbfd4143f6b0c	0.94566
f1bb935fa8a308892ff011e7813dfc5c	14525301bb4271314d10e75fe308a602	0.94566
f1bb935fa8a308892ff011e7813dfc5c	0315be37f6165f1e87335603ad7d63e9	0.94566
f1bb935fa8a308892ff011e7813dfc5c	3437f453277efee108b6338b65ec716d	0.94566
f1bb935fa8a308892ff011e7813dfc5c	c57eee14afd7a19174edd5b241350a02	0.94566
d8783ee923cd85c2a36a867210303e03	84e422b114928ef1d913b13075ca5903	0.94566
d8783ee923cd85c2a36a867210303e03	736281d70ec672edc46ef1986b47e1a9	0.94566
d8783ee923cd85c2a36a867210303e03	8080b535f4bf339a8d5fee285ddab60b	0.94566
d8783ee923cd85c2a36a867210303e03	b07a379d1b16d945fac249328c0fc3d4	0.94566
d8783ee923cd85c2a36a867210303e03	9e8523807c59f3603834a25cbcd86494	0.94566
d8783ee923cd85c2a36a867210303e03	69916a1cde832bb15ac5acc0ef5e3518	0.94566
d8783ee923cd85c2a36a867210303e03	0342f30ab678cb75dc7d44eb6d1f3c71	0.94566
60f980bd7c0b414ac99a2c7faeae33bd	49c1ac3db0834e9040ad888443339e6f	0.94566
eda6f9881bff8aea35a15d26cc534efd	22f26cc2c7277df74d59aa1f5adb05e4	0.94566
eda6f9881bff8aea35a15d26cc534efd	cefbbaabbe2748b243095e71e7b86265	0.94566
eda6f9881bff8aea35a15d26cc534efd	0166ac0863837f3e87a4a75afd9e7ddf	0.94566
eda6f9881bff8aea35a15d26cc534efd	801463e61abcfcc2938e84e16c3929d6	0.94566
eda6f9881bff8aea35a15d26cc534efd	e4db4b69f4dcb92e21a950f284ec8b75	0.94566
eda6f9881bff8aea35a15d26cc534efd	a1219c3e384b263c96f09ff1f1cea107	0.94566
eda6f9881bff8aea35a15d26cc534efd	05ee809c46ccca3097f50d1123609e5a	0.94566
eda6f9881bff8aea35a15d26cc534efd	f6608e71c06674d8840e9cb8ccb2e74d	0.94566
eda6f9881bff8aea35a15d26cc534efd	9b1e92389ef0cc5317353e8ea8426a70	0.94566
eda6f9881bff8aea35a15d26cc534efd	bdb19eb6ef13bfed15a7ebb821a6d403	0.94566
eda6f9881bff8aea35a15d26cc534efd	c1b64e9ee44cded7174eb92430f7ac95	0.94566
eda6f9881bff8aea35a15d26cc534efd	d9db432ac0d299dffcadd359c0e7120b	0.94566
eda6f9881bff8aea35a15d26cc534efd	9d510a1ee7233ab15bca064515917a04	0.94566
eda6f9881bff8aea35a15d26cc534efd	675f47f52ab28cdcf30e23836997082e	0.94566
eda6f9881bff8aea35a15d26cc534efd	55ba03929d537e43f91aa98c36421f34	0.94566
9002f85b03d9dcb79bdf61619b029a94	da17572657f5636c66a5ce8c2d04922f	0.94566
9002f85b03d9dcb79bdf61619b029a94	f6ecd0322cb47d8786f055d9bcd06354	0.94566
5135b86f37750dfe66b4941dbb4cf998	9c94712b0ac128883aeed3cf0cd696c7	0.94566
5135b86f37750dfe66b4941dbb4cf998	7eab0a327e61cde847742596712dcadb	0.94566
5135b86f37750dfe66b4941dbb4cf998	e8ead60320c81b952c5a45aa67271a48	0.94566
10ca86dccfe1472117a0599a1f4f1635	4626abe1b3958f24002d1d38b7e8ac91	0.94566
10ca86dccfe1472117a0599a1f4f1635	db479043d01c7c0f52d725110a613bdc	0.94566
10ca86dccfe1472117a0599a1f4f1635	ab13b942cfeed744362c9214b1c659ba	0.94566
8645ac02dc586fcd4a083b94279834f7	9affe599a6d2f44999e629303626ac7e	0.94566
8645ac02dc586fcd4a083b94279834f7	88e6f82436084085cc315124858fcceb	0.94566
8645ac02dc586fcd4a083b94279834f7	b991efbddcb23a9ce7cf362a9a85f7dd	0.94566
8645ac02dc586fcd4a083b94279834f7	fcb732848a3d018dde12adafdf5fa5f9	0.94566
8645ac02dc586fcd4a083b94279834f7	5d4c6ff0af28c31e7a1ed5f68d427a1e	0.94566
1438af8d3f304470c4aee3d93544521e	c22273f574a6358a8544884020f7a822	0.94566
66c5253c6d7fc739b2d882966842f805	d239e96a3f1ad1ebf4ed9aee42656456	0.94566
66c5253c6d7fc739b2d882966842f805	3b3bbab9ab17d53dd61ce47bd1aef746	0.94566
66c5253c6d7fc739b2d882966842f805	a018dfb928f901a2fbc3ee62c0e7362b	0.94566
22f26cc2c7277df74d59aa1f5adb05e4	cefbbaabbe2748b243095e71e7b86265	0.94566
22f26cc2c7277df74d59aa1f5adb05e4	801463e61abcfcc2938e84e16c3929d6	0.94566
22f26cc2c7277df74d59aa1f5adb05e4	e4db4b69f4dcb92e21a950f284ec8b75	0.94566
22f26cc2c7277df74d59aa1f5adb05e4	a1219c3e384b263c96f09ff1f1cea107	0.94566
22f26cc2c7277df74d59aa1f5adb05e4	f6608e71c06674d8840e9cb8ccb2e74d	0.94566
22f26cc2c7277df74d59aa1f5adb05e4	bdb19eb6ef13bfed15a7ebb821a6d403	0.94566
22f26cc2c7277df74d59aa1f5adb05e4	9d510a1ee7233ab15bca064515917a04	0.94566
22f26cc2c7277df74d59aa1f5adb05e4	26e3172c82dba111de5112291a32e042	0.94566
566cad8c05c2852195e900301d143443	265f93f99468f9605a5031488c920eb1	0.94566
566cad8c05c2852195e900301d143443	3b3bbab9ab17d53dd61ce47bd1aef746	0.94566
33ec2672acc39980a0e805c26d08cb79	fbe36876d118508cf7e4fb67cbc032e2	0.94566
33ec2672acc39980a0e805c26d08cb79	801463e61abcfcc2938e84e16c3929d6	0.94566
33ec2672acc39980a0e805c26d08cb79	4e7254e7faee92f9868759c556ed73ae	0.94566
33ec2672acc39980a0e805c26d08cb79	265f93f99468f9605a5031488c920eb1	0.94566
33ec2672acc39980a0e805c26d08cb79	422efbd87a37e2b1e7b7fa621cc99374	0.94566
33ec2672acc39980a0e805c26d08cb79	8a13f20e0e4548413b745bf51c9980b3	0.94566
33ec2672acc39980a0e805c26d08cb79	58b68525f7a335fdba75a3ce75720e07	0.94566
33ec2672acc39980a0e805c26d08cb79	1dad302680b9cc2a56187e8bdfb1cf58	0.94566
33ec2672acc39980a0e805c26d08cb79	6541e91fe6c7318b063690b1da719852	0.94566
33ec2672acc39980a0e805c26d08cb79	cf128de805981908ffc28e6be7a5f7e8	0.94566
33ec2672acc39980a0e805c26d08cb79	c4b50715602cceccd5ba14916e71bbbb	0.94566
33ec2672acc39980a0e805c26d08cb79	0467b796cedda0e417b7e95a797eb8fd	0.94566
33ec2672acc39980a0e805c26d08cb79	8e422b0b6170093273f54d40542df24c	0.94566
33ec2672acc39980a0e805c26d08cb79	8c357abf174733947c627dde698d3f93	0.94566
d6daa9a6e5792039508ec8abae22a8ea	6f2548da34731900e68ee1bbeed4a579	0.94566
d6daa9a6e5792039508ec8abae22a8ea	82c9e178eb04788207c4d1da199ee71b	0.94566
d6daa9a6e5792039508ec8abae22a8ea	44de42967ac70282bc8850cc2a9647ce	0.94566
d6daa9a6e5792039508ec8abae22a8ea	93c1449aef105c81ee44691574a04fa6	0.94566
cefbbaabbe2748b243095e71e7b86265	801463e61abcfcc2938e84e16c3929d6	0.94566
cefbbaabbe2748b243095e71e7b86265	a1219c3e384b263c96f09ff1f1cea107	0.94566
cefbbaabbe2748b243095e71e7b86265	9d510a1ee7233ab15bca064515917a04	0.94566
f2830995d6cbc95a7373bae372ab8659	5f1e11b766b8b422db0c1f28549d2c34	0.94566
f3ec851b710817bb01a81540c8a17a53	441b997bec002a7fe05e0ad7e4bfc14e	0.94566
f3ec851b710817bb01a81540c8a17a53	4cdf9aeb68a51fc2fff2f82e2e682c5b	0.94566
790e976dfd7c72094f38aee1b759d212	8d2788d498bc6528a24e66350380fb78	0.94566
790e976dfd7c72094f38aee1b759d212	55814a4ea8a202d9b328c7b68584bf90	0.94566
790e976dfd7c72094f38aee1b759d212	d56d487973829be6bedf092e2fc3b90e	0.94566
790e976dfd7c72094f38aee1b759d212	60da738bc4b046c5c5c7b22f77832a90	0.94566
790e976dfd7c72094f38aee1b759d212	0a7cff6daea23145cea146dfb78df6df	0.94566
790e976dfd7c72094f38aee1b759d212	6916d97494489296801671b8d18a0309	0.94566
790e976dfd7c72094f38aee1b759d212	0f6006dc9edddee73c4e03a918c3aa66	0.94566
790e976dfd7c72094f38aee1b759d212	e131d6b9e4f997788460a450a69c3a99	0.94566
790e976dfd7c72094f38aee1b759d212	8c68c8f1ca3ceb58bd95ff2e2f7444af	0.94566
790e976dfd7c72094f38aee1b759d212	b092f7f3425cc2dfc9965117ab63717d	0.94566
790e976dfd7c72094f38aee1b759d212	49c1ac3db0834e9040ad888443339e6f	0.94566
790e976dfd7c72094f38aee1b759d212	6c553b44e9fd5caef365f5ea41f4d6f3	0.94566
790e976dfd7c72094f38aee1b759d212	0b04a06598d5b5b3f758c73cb8792ab9	0.94566
790e976dfd7c72094f38aee1b759d212	20dd251ae02aea592d801d239b63f9e4	0.94566
790e976dfd7c72094f38aee1b759d212	3a9208d106ad373e9d8528bbe6b9c5ad	0.94566
05d8c38aa39c708e6f1f4f29ee655f38	58b68525f7a335fdba75a3ce75720e07	0.94566
443164c71768102f8656148048472610	2c914ca6839f67afcfecf21668190d7e	0.94566
443164c71768102f8656148048472610	5d0fee9c66e12c632ee634131979c10c	0.94566
8d2788d498bc6528a24e66350380fb78	55814a4ea8a202d9b328c7b68584bf90	0.94566
8d2788d498bc6528a24e66350380fb78	d56d487973829be6bedf092e2fc3b90e	0.94566
8d2788d498bc6528a24e66350380fb78	60da738bc4b046c5c5c7b22f77832a90	0.94566
8d2788d498bc6528a24e66350380fb78	0a7cff6daea23145cea146dfb78df6df	0.94566
8d2788d498bc6528a24e66350380fb78	6916d97494489296801671b8d18a0309	0.94566
8d2788d498bc6528a24e66350380fb78	0f6006dc9edddee73c4e03a918c3aa66	0.94566
8d2788d498bc6528a24e66350380fb78	e131d6b9e4f997788460a450a69c3a99	0.94566
8d2788d498bc6528a24e66350380fb78	5f042513c67fdd55888051594cb486ac	0.94566
8d2788d498bc6528a24e66350380fb78	8c68c8f1ca3ceb58bd95ff2e2f7444af	0.94566
8d2788d498bc6528a24e66350380fb78	b092f7f3425cc2dfc9965117ab63717d	0.94566
8d2788d498bc6528a24e66350380fb78	49c1ac3db0834e9040ad888443339e6f	0.94566
8d2788d498bc6528a24e66350380fb78	2652f19ead90e82ed89bbfd4143f6b0c	0.94566
8d2788d498bc6528a24e66350380fb78	0b04a06598d5b5b3f758c73cb8792ab9	0.94566
8d2788d498bc6528a24e66350380fb78	20dd251ae02aea592d801d239b63f9e4	0.94566
8d2788d498bc6528a24e66350380fb78	3a9208d106ad373e9d8528bbe6b9c5ad	0.94566
e7738cf0bb82ac429231fb6fded5e47a	8a13f20e0e4548413b745bf51c9980b3	0.94566
e7738cf0bb82ac429231fb6fded5e47a	f2816e09b5444945d9cb7c5c801d427d	0.94566
4201c8cbbc7f7323b35e8fbdb4f7704a	441b997bec002a7fe05e0ad7e4bfc14e	0.94566
4201c8cbbc7f7323b35e8fbdb4f7704a	22a7879edff5dac58a2323ea2f5f00cf	0.94566
4201c8cbbc7f7323b35e8fbdb4f7704a	4cdf9aeb68a51fc2fff2f82e2e682c5b	0.94566
4201c8cbbc7f7323b35e8fbdb4f7704a	ce62e1f26d0adbb3fff55b907a4a777a	0.94566
4201c8cbbc7f7323b35e8fbdb4f7704a	b9b5730119aeb35ad16030e2188cb3bf	0.94566
0166ac0863837f3e87a4a75afd9e7ddf	6916d97494489296801671b8d18a0309	0.94566
0166ac0863837f3e87a4a75afd9e7ddf	05ee809c46ccca3097f50d1123609e5a	0.94566
0166ac0863837f3e87a4a75afd9e7ddf	9b1e92389ef0cc5317353e8ea8426a70	0.94566
0166ac0863837f3e87a4a75afd9e7ddf	c1b64e9ee44cded7174eb92430f7ac95	0.94566
0166ac0863837f3e87a4a75afd9e7ddf	d9db432ac0d299dffcadd359c0e7120b	0.94566
0166ac0863837f3e87a4a75afd9e7ddf	b42fc99cbb9150042fb31318bd88b12c	0.94566
0166ac0863837f3e87a4a75afd9e7ddf	675f47f52ab28cdcf30e23836997082e	0.94566
0166ac0863837f3e87a4a75afd9e7ddf	9efb69f287a7f7fffdc3ba17b646628f	0.94566
0166ac0863837f3e87a4a75afd9e7ddf	0b04a06598d5b5b3f758c73cb8792ab9	0.94566
0166ac0863837f3e87a4a75afd9e7ddf	55ba03929d537e43f91aa98c36421f34	0.94566
fbe36876d118508cf7e4fb67cbc032e2	4e7254e7faee92f9868759c556ed73ae	0.94566
fbe36876d118508cf7e4fb67cbc032e2	99847a0aad4c578374c41bae937991b6	0.94566
fbe36876d118508cf7e4fb67cbc032e2	265f93f99468f9605a5031488c920eb1	0.94566
fbe36876d118508cf7e4fb67cbc032e2	7233e4cdaface6927d43773c964f94e4	0.94566
fbe36876d118508cf7e4fb67cbc032e2	422efbd87a37e2b1e7b7fa621cc99374	0.94566
fbe36876d118508cf7e4fb67cbc032e2	53f106106d2d64f757ac71843f1abfd4	0.94566
fbe36876d118508cf7e4fb67cbc032e2	58b68525f7a335fdba75a3ce75720e07	0.94566
fbe36876d118508cf7e4fb67cbc032e2	6541e91fe6c7318b063690b1da719852	0.94566
fbe36876d118508cf7e4fb67cbc032e2	cf128de805981908ffc28e6be7a5f7e8	0.94566
fbe36876d118508cf7e4fb67cbc032e2	c4b50715602cceccd5ba14916e71bbbb	0.94566
fbe36876d118508cf7e4fb67cbc032e2	8c357abf174733947c627dde698d3f93	0.94566
9f694ae065fcfcf17a298da89935a0c7	5f042513c67fdd55888051594cb486ac	0.94566
9f694ae065fcfcf17a298da89935a0c7	6c553b44e9fd5caef365f5ea41f4d6f3	0.94566
801463e61abcfcc2938e84e16c3929d6	e4db4b69f4dcb92e21a950f284ec8b75	0.94566
801463e61abcfcc2938e84e16c3929d6	7233e4cdaface6927d43773c964f94e4	0.94566
801463e61abcfcc2938e84e16c3929d6	a1219c3e384b263c96f09ff1f1cea107	0.94566
801463e61abcfcc2938e84e16c3929d6	f6608e71c06674d8840e9cb8ccb2e74d	0.94566
801463e61abcfcc2938e84e16c3929d6	bdb19eb6ef13bfed15a7ebb821a6d403	0.94566
801463e61abcfcc2938e84e16c3929d6	cf128de805981908ffc28e6be7a5f7e8	0.94566
801463e61abcfcc2938e84e16c3929d6	9d510a1ee7233ab15bca064515917a04	0.94566
801463e61abcfcc2938e84e16c3929d6	0467b796cedda0e417b7e95a797eb8fd	0.94566
801463e61abcfcc2938e84e16c3929d6	8e422b0b6170093273f54d40542df24c	0.94566
c6eecb8a5f4550768cfd4d4a4723c636	d239e96a3f1ad1ebf4ed9aee42656456	0.94566
c6eecb8a5f4550768cfd4d4a4723c636	3b3bbab9ab17d53dd61ce47bd1aef746	0.94566
c6eecb8a5f4550768cfd4d4a4723c636	a018dfb928f901a2fbc3ee62c0e7362b	0.94566
4e7254e7faee92f9868759c556ed73ae	99847a0aad4c578374c41bae937991b6	0.94566
4e7254e7faee92f9868759c556ed73ae	265f93f99468f9605a5031488c920eb1	0.94566
4e7254e7faee92f9868759c556ed73ae	7233e4cdaface6927d43773c964f94e4	0.94566
4e7254e7faee92f9868759c556ed73ae	422efbd87a37e2b1e7b7fa621cc99374	0.94566
4e7254e7faee92f9868759c556ed73ae	8a13f20e0e4548413b745bf51c9980b3	0.94566
4e7254e7faee92f9868759c556ed73ae	58b68525f7a335fdba75a3ce75720e07	0.94566
4e7254e7faee92f9868759c556ed73ae	1dad302680b9cc2a56187e8bdfb1cf58	0.94566
4e7254e7faee92f9868759c556ed73ae	6541e91fe6c7318b063690b1da719852	0.94566
4e7254e7faee92f9868759c556ed73ae	cf128de805981908ffc28e6be7a5f7e8	0.94566
4e7254e7faee92f9868759c556ed73ae	c4b50715602cceccd5ba14916e71bbbb	0.94566
4e7254e7faee92f9868759c556ed73ae	8c357abf174733947c627dde698d3f93	0.94566
14525301bb4271314d10e75fe308a602	0915263f5f4c5ca4e656773ecaeddd7a	0.94566
14525301bb4271314d10e75fe308a602	0315be37f6165f1e87335603ad7d63e9	0.94566
14525301bb4271314d10e75fe308a602	3437f453277efee108b6338b65ec716d	0.94566
14525301bb4271314d10e75fe308a602	cd98632699c5f92b428dd2337fc27563	0.94566
14525301bb4271314d10e75fe308a602	c57eee14afd7a19174edd5b241350a02	0.94566
14525301bb4271314d10e75fe308a602	56f9c987896664bf30b7df45f17c2c30	0.94566
4dd120c42c5cdd3a2243b85667c65f86	c8583ffc493e6da2028670a01931b6a7	0.94566
1c6a8d82c50697fc1082823692d45758	61ab824b63756fa52f4adc38774d9cfd	0.94566
1c6a8d82c50697fc1082823692d45758	22de55f19b9739b7daa0e448bad17f34	0.94566
1c6a8d82c50697fc1082823692d45758	dd2c4829035030d079cc39155292c30e	0.94566
9affe599a6d2f44999e629303626ac7e	88e6f82436084085cc315124858fcceb	0.94566
9affe599a6d2f44999e629303626ac7e	b991efbddcb23a9ce7cf362a9a85f7dd	0.94566
9affe599a6d2f44999e629303626ac7e	5d4c6ff0af28c31e7a1ed5f68d427a1e	0.94566
99847a0aad4c578374c41bae937991b6	bf7c8b35b60d08c0bf62fc2894b0a543	0.94566
99847a0aad4c578374c41bae937991b6	265f93f99468f9605a5031488c920eb1	0.94566
99847a0aad4c578374c41bae937991b6	8a13f20e0e4548413b745bf51c9980b3	0.94566
99847a0aad4c578374c41bae937991b6	58b68525f7a335fdba75a3ce75720e07	0.94566
99847a0aad4c578374c41bae937991b6	1dad302680b9cc2a56187e8bdfb1cf58	0.94566
99847a0aad4c578374c41bae937991b6	6541e91fe6c7318b063690b1da719852	0.94566
99847a0aad4c578374c41bae937991b6	cf128de805981908ffc28e6be7a5f7e8	0.94566
99847a0aad4c578374c41bae937991b6	15e3be12e07b72a573253f48a59b633d	0.94566
99847a0aad4c578374c41bae937991b6	c4b50715602cceccd5ba14916e71bbbb	0.94566
bf7c8b35b60d08c0bf62fc2894b0a543	f6608e71c06674d8840e9cb8ccb2e74d	0.94566
bf7c8b35b60d08c0bf62fc2894b0a543	15e3be12e07b72a573253f48a59b633d	0.94566
bf7c8b35b60d08c0bf62fc2894b0a543	d1a77854e0dbdb2bf473c8e3eb48c0ee	0.94566
b6be254413a7e7d160e6ca9101729245	9b03b9f9eb72fe49be3d2e4ee544f849	0.94566
b6be254413a7e7d160e6ca9101729245	7e857ab7033d8eae6b29d820ef13ebb5	0.94566
b6be254413a7e7d160e6ca9101729245	6916815c0ac8c809f4feffb4f33fa465	0.94566
b6be254413a7e7d160e6ca9101729245	90a3648550c58dac0d8a380eeeb8cf17	0.94566
b6be254413a7e7d160e6ca9101729245	02e5fcb493c97a6162bc6ed94e037aac	0.94566
b6be254413a7e7d160e6ca9101729245	34b68b1ef916cbbfcf7e587bb154452d	0.94566
b6be254413a7e7d160e6ca9101729245	2652f19ead90e82ed89bbfd4143f6b0c	0.94566
b6be254413a7e7d160e6ca9101729245	96a9773aa46a3d58007f76fad394d5f4	0.94566
55814a4ea8a202d9b328c7b68584bf90	d56d487973829be6bedf092e2fc3b90e	0.94566
55814a4ea8a202d9b328c7b68584bf90	60da738bc4b046c5c5c7b22f77832a90	0.94566
55814a4ea8a202d9b328c7b68584bf90	0a7cff6daea23145cea146dfb78df6df	0.94566
55814a4ea8a202d9b328c7b68584bf90	6916d97494489296801671b8d18a0309	0.94566
55814a4ea8a202d9b328c7b68584bf90	0f6006dc9edddee73c4e03a918c3aa66	0.94566
55814a4ea8a202d9b328c7b68584bf90	e131d6b9e4f997788460a450a69c3a99	0.94566
55814a4ea8a202d9b328c7b68584bf90	8c68c8f1ca3ceb58bd95ff2e2f7444af	0.94566
55814a4ea8a202d9b328c7b68584bf90	b092f7f3425cc2dfc9965117ab63717d	0.94566
55814a4ea8a202d9b328c7b68584bf90	49c1ac3db0834e9040ad888443339e6f	0.94566
55814a4ea8a202d9b328c7b68584bf90	a824b066eb0b77c728cfab213da2e002	0.94566
55814a4ea8a202d9b328c7b68584bf90	2652f19ead90e82ed89bbfd4143f6b0c	0.94566
55814a4ea8a202d9b328c7b68584bf90	0b04a06598d5b5b3f758c73cb8792ab9	0.94566
55814a4ea8a202d9b328c7b68584bf90	20dd251ae02aea592d801d239b63f9e4	0.94566
55814a4ea8a202d9b328c7b68584bf90	70c3da9a368397a37246d8dcdf38f4cb	0.94566
55814a4ea8a202d9b328c7b68584bf90	3a9208d106ad373e9d8528bbe6b9c5ad	0.94566
45ce9f54d9768cda11c5fd16fb7376f9	1ee948b5ef1c4af93bce919fe1350f59	0.94566
45ce9f54d9768cda11c5fd16fb7376f9	fbba10bc26152630ec70583c4fb41d7d	0.94566
9bae969e46731bfb02da1c09e93c5605	736281d70ec672edc46ef1986b47e1a9	0.94566
9bae969e46731bfb02da1c09e93c5605	bce23b9b289bb43bff25cd148f080557	0.94566
9bae969e46731bfb02da1c09e93c5605	bc61c16683aa91f4a47a2266993a69d1	0.94566
9bae969e46731bfb02da1c09e93c5605	fcb732848a3d018dde12adafdf5fa5f9	0.94566
9bae969e46731bfb02da1c09e93c5605	3f1304fc1b0de80cad541bdcff9676a5	0.94566
d56d487973829be6bedf092e2fc3b90e	60da738bc4b046c5c5c7b22f77832a90	0.94566
d56d487973829be6bedf092e2fc3b90e	0a7cff6daea23145cea146dfb78df6df	0.94566
d56d487973829be6bedf092e2fc3b90e	6916d97494489296801671b8d18a0309	0.94566
d56d487973829be6bedf092e2fc3b90e	0f6006dc9edddee73c4e03a918c3aa66	0.94566
d56d487973829be6bedf092e2fc3b90e	5f042513c67fdd55888051594cb486ac	0.94566
d56d487973829be6bedf092e2fc3b90e	fa493aa4f1faf6be9820d19f83cdd969	0.94566
d56d487973829be6bedf092e2fc3b90e	8c68c8f1ca3ceb58bd95ff2e2f7444af	0.94566
d56d487973829be6bedf092e2fc3b90e	b092f7f3425cc2dfc9965117ab63717d	0.94566
d56d487973829be6bedf092e2fc3b90e	0b04a06598d5b5b3f758c73cb8792ab9	0.94566
d56d487973829be6bedf092e2fc3b90e	20dd251ae02aea592d801d239b63f9e4	0.94566
d56d487973829be6bedf092e2fc3b90e	3a9208d106ad373e9d8528bbe6b9c5ad	0.94566
05734150853338b5e489721794a7c826	60da738bc4b046c5c5c7b22f77832a90	0.94566
05734150853338b5e489721794a7c826	441b997bec002a7fe05e0ad7e4bfc14e	0.94566
05734150853338b5e489721794a7c826	da17572657f5636c66a5ce8c2d04922f	0.94566
05734150853338b5e489721794a7c826	b34fb0904caa8c1db6df0f5cb24da6b2	0.94566
05734150853338b5e489721794a7c826	64bcf94b568e9cbaa0404d841ad75435	0.94566
05734150853338b5e489721794a7c826	8bd33e664b9a859086f52c1737c36339	0.94566
05734150853338b5e489721794a7c826	5d0fee9c66e12c632ee634131979c10c	0.94566
05734150853338b5e489721794a7c826	337145739bb153cea3d3c53595acbf22	0.94566
05734150853338b5e489721794a7c826	0f407bb44ce651722dc620d0f9490b63	0.94566
05734150853338b5e489721794a7c826	afede6d9aa8210bc3d25c9253a7a4f84	0.94566
05734150853338b5e489721794a7c826	4cdf9aeb68a51fc2fff2f82e2e682c5b	0.94566
05734150853338b5e489721794a7c826	a3ce2b76a5b2daccdcc5c58ee218896a	0.94566
05734150853338b5e489721794a7c826	6b8146cb68c2d5021bd95561bfc0e7ee	0.94566
05734150853338b5e489721794a7c826	4975e9498ed5c0822a2f200287a6c612	0.94566
05734150853338b5e489721794a7c826	20dd251ae02aea592d801d239b63f9e4	0.94566
05734150853338b5e489721794a7c826	55ba03929d537e43f91aa98c36421f34	0.94566
d239e96a3f1ad1ebf4ed9aee42656456	3b3bbab9ab17d53dd61ce47bd1aef746	0.94566
d239e96a3f1ad1ebf4ed9aee42656456	a018dfb928f901a2fbc3ee62c0e7362b	0.94566
d239e96a3f1ad1ebf4ed9aee42656456	df5a861dbf82d100812defe4b06ce542	0.94566
60da738bc4b046c5c5c7b22f77832a90	441b997bec002a7fe05e0ad7e4bfc14e	0.94566
60da738bc4b046c5c5c7b22f77832a90	6916d97494489296801671b8d18a0309	0.94566
60da738bc4b046c5c5c7b22f77832a90	da17572657f5636c66a5ce8c2d04922f	0.94566
60da738bc4b046c5c5c7b22f77832a90	b34fb0904caa8c1db6df0f5cb24da6b2	0.94566
60da738bc4b046c5c5c7b22f77832a90	e131d6b9e4f997788460a450a69c3a99	0.94566
60da738bc4b046c5c5c7b22f77832a90	64bcf94b568e9cbaa0404d841ad75435	0.94566
60da738bc4b046c5c5c7b22f77832a90	696fcd39d96eaa84510ddbb3e00d8263	0.94566
60da738bc4b046c5c5c7b22f77832a90	5f042513c67fdd55888051594cb486ac	0.94566
60da738bc4b046c5c5c7b22f77832a90	8bd33e664b9a859086f52c1737c36339	0.94566
60da738bc4b046c5c5c7b22f77832a90	5d0fee9c66e12c632ee634131979c10c	0.94566
60da738bc4b046c5c5c7b22f77832a90	337145739bb153cea3d3c53595acbf22	0.94566
60da738bc4b046c5c5c7b22f77832a90	0f407bb44ce651722dc620d0f9490b63	0.94566
60da738bc4b046c5c5c7b22f77832a90	8c68c8f1ca3ceb58bd95ff2e2f7444af	0.94566
60da738bc4b046c5c5c7b22f77832a90	afede6d9aa8210bc3d25c9253a7a4f84	0.94566
60da738bc4b046c5c5c7b22f77832a90	4cdf9aeb68a51fc2fff2f82e2e682c5b	0.94566
60da738bc4b046c5c5c7b22f77832a90	49c1ac3db0834e9040ad888443339e6f	0.94566
60da738bc4b046c5c5c7b22f77832a90	79b7674106bc3fb9eccf73c5bd64bfb5	0.94566
60da738bc4b046c5c5c7b22f77832a90	a3ce2b76a5b2daccdcc5c58ee218896a	0.94566
60da738bc4b046c5c5c7b22f77832a90	aa13b33f5e1937ef92b901d75f190fbe	0.94566
60da738bc4b046c5c5c7b22f77832a90	6b8146cb68c2d5021bd95561bfc0e7ee	0.94566
60da738bc4b046c5c5c7b22f77832a90	0b04a06598d5b5b3f758c73cb8792ab9	0.94566
60da738bc4b046c5c5c7b22f77832a90	4975e9498ed5c0822a2f200287a6c612	0.94566
60da738bc4b046c5c5c7b22f77832a90	6d17ed796a25ea35dc19e67c30960976	0.94566
60da738bc4b046c5c5c7b22f77832a90	3a9208d106ad373e9d8528bbe6b9c5ad	0.94566
60da738bc4b046c5c5c7b22f77832a90	55ba03929d537e43f91aa98c36421f34	0.94566
e4db4b69f4dcb92e21a950f284ec8b75	a1219c3e384b263c96f09ff1f1cea107	0.94566
e4db4b69f4dcb92e21a950f284ec8b75	f6608e71c06674d8840e9cb8ccb2e74d	0.94566
e4db4b69f4dcb92e21a950f284ec8b75	bdb19eb6ef13bfed15a7ebb821a6d403	0.94566
61ab824b63756fa52f4adc38774d9cfd	22de55f19b9739b7daa0e448bad17f34	0.94566
61ab824b63756fa52f4adc38774d9cfd	dd2c4829035030d079cc39155292c30e	0.94566
88e6f82436084085cc315124858fcceb	51262c0e7e875ebe8e03cf077ac177c5	0.94566
88e6f82436084085cc315124858fcceb	878ac7527f7fdf86178eaa89ab6398fe	0.94566
88e6f82436084085cc315124858fcceb	5d4c6ff0af28c31e7a1ed5f68d427a1e	0.94566
e39b0a8cf183344fae62c2e14a46a910	c0086f50c449526558dcbb7fd569043f	0.94566
e39b0a8cf183344fae62c2e14a46a910	27153535b92b8bd0d59aeee8456e91ca	0.94566
e39b0a8cf183344fae62c2e14a46a910	ac2662d36a91cba0d6b8fee15d75ead0	0.94566
e39b0a8cf183344fae62c2e14a46a910	c1b64e9ee44cded7174eb92430f7ac95	0.94566
e39b0a8cf183344fae62c2e14a46a910	d9db432ac0d299dffcadd359c0e7120b	0.94566
e39b0a8cf183344fae62c2e14a46a910	39e70d892a1b487e00ae81b7b70491af	0.94566
2c914ca6839f67afcfecf21668190d7e	5d0fee9c66e12c632ee634131979c10c	0.94566
2c914ca6839f67afcfecf21668190d7e	da8260f3fd39c10fa491e191f903c14e	0.94566
9b03b9f9eb72fe49be3d2e4ee544f849	6916815c0ac8c809f4feffb4f33fa465	0.94566
9b03b9f9eb72fe49be3d2e4ee544f849	90a3648550c58dac0d8a380eeeb8cf17	0.94566
9b03b9f9eb72fe49be3d2e4ee544f849	02e5fcb493c97a6162bc6ed94e037aac	0.94566
9b03b9f9eb72fe49be3d2e4ee544f849	34b68b1ef916cbbfcf7e587bb154452d	0.94566
9b03b9f9eb72fe49be3d2e4ee544f849	2652f19ead90e82ed89bbfd4143f6b0c	0.94566
9b03b9f9eb72fe49be3d2e4ee544f849	96a9773aa46a3d58007f76fad394d5f4	0.94566
801b3393e0a3890bcce4fa4681e31ea9	e131d6b9e4f997788460a450a69c3a99	0.94566
801b3393e0a3890bcce4fa4681e31ea9	b092f7f3425cc2dfc9965117ab63717d	0.94566
265f93f99468f9605a5031488c920eb1	7233e4cdaface6927d43773c964f94e4	0.94566
265f93f99468f9605a5031488c920eb1	422efbd87a37e2b1e7b7fa621cc99374	0.94566
265f93f99468f9605a5031488c920eb1	8a13f20e0e4548413b745bf51c9980b3	0.94566
265f93f99468f9605a5031488c920eb1	58b68525f7a335fdba75a3ce75720e07	0.94566
265f93f99468f9605a5031488c920eb1	1dad302680b9cc2a56187e8bdfb1cf58	0.94566
265f93f99468f9605a5031488c920eb1	6541e91fe6c7318b063690b1da719852	0.94566
265f93f99468f9605a5031488c920eb1	c4b50715602cceccd5ba14916e71bbbb	0.94566
265f93f99468f9605a5031488c920eb1	8c357abf174733947c627dde698d3f93	0.94566
0a7cff6daea23145cea146dfb78df6df	6916d97494489296801671b8d18a0309	0.94566
0a7cff6daea23145cea146dfb78df6df	bdb19eb6ef13bfed15a7ebb821a6d403	0.94566
0a7cff6daea23145cea146dfb78df6df	e131d6b9e4f997788460a450a69c3a99	0.94566
0a7cff6daea23145cea146dfb78df6df	5f042513c67fdd55888051594cb486ac	0.94566
0a7cff6daea23145cea146dfb78df6df	8c68c8f1ca3ceb58bd95ff2e2f7444af	0.94566
0a7cff6daea23145cea146dfb78df6df	49c1ac3db0834e9040ad888443339e6f	0.94566
0a7cff6daea23145cea146dfb78df6df	0b04a06598d5b5b3f758c73cb8792ab9	0.94566
0a7cff6daea23145cea146dfb78df6df	3a9208d106ad373e9d8528bbe6b9c5ad	0.94566
7233e4cdaface6927d43773c964f94e4	422efbd87a37e2b1e7b7fa621cc99374	0.94566
7233e4cdaface6927d43773c964f94e4	8a13f20e0e4548413b745bf51c9980b3	0.94566
7233e4cdaface6927d43773c964f94e4	58b68525f7a335fdba75a3ce75720e07	0.94566
7233e4cdaface6927d43773c964f94e4	1dad302680b9cc2a56187e8bdfb1cf58	0.94566
7233e4cdaface6927d43773c964f94e4	6541e91fe6c7318b063690b1da719852	0.94566
7233e4cdaface6927d43773c964f94e4	cf128de805981908ffc28e6be7a5f7e8	0.94566
7233e4cdaface6927d43773c964f94e4	c4b50715602cceccd5ba14916e71bbbb	0.94566
7233e4cdaface6927d43773c964f94e4	0467b796cedda0e417b7e95a797eb8fd	0.94566
7233e4cdaface6927d43773c964f94e4	8e422b0b6170093273f54d40542df24c	0.94566
7233e4cdaface6927d43773c964f94e4	8c357abf174733947c627dde698d3f93	0.94566
84e422b114928ef1d913b13075ca5903	8080b535f4bf339a8d5fee285ddab60b	0.94566
84e422b114928ef1d913b13075ca5903	759ac655001806785218ecfb18b06a1d	0.94566
84e422b114928ef1d913b13075ca5903	b07a379d1b16d945fac249328c0fc3d4	0.94566
84e422b114928ef1d913b13075ca5903	9e8523807c59f3603834a25cbcd86494	0.94566
84e422b114928ef1d913b13075ca5903	0342f30ab678cb75dc7d44eb6d1f3c71	0.94566
736281d70ec672edc46ef1986b47e1a9	bc61c16683aa91f4a47a2266993a69d1	0.94566
736281d70ec672edc46ef1986b47e1a9	93c1449aef105c81ee44691574a04fa6	0.94566
736281d70ec672edc46ef1986b47e1a9	69916a1cde832bb15ac5acc0ef5e3518	0.94566
baaac2b84af41b8a30bd36a3ce0afdf6	c6911e1ac67555f4a10f39df29c35a82	0.94566
baaac2b84af41b8a30bd36a3ce0afdf6	6dd57d68807306a85a30f15e758134d4	0.94566
baaac2b84af41b8a30bd36a3ce0afdf6	90a3648550c58dac0d8a380eeeb8cf17	0.94566
baaac2b84af41b8a30bd36a3ce0afdf6	eb56533502639959923e46d4d4ce2d36	0.94566
baaac2b84af41b8a30bd36a3ce0afdf6	9d510a1ee7233ab15bca064515917a04	0.94566
baaac2b84af41b8a30bd36a3ce0afdf6	63bf8d81940fc455b5cc541cc7a660bb	0.94566
baaac2b84af41b8a30bd36a3ce0afdf6	96a9773aa46a3d58007f76fad394d5f4	0.94566
4819e8a06d5d9c28790f1793f527dfda	f76d0ff8b2a18523b391183ec0615549	0.94566
4819e8a06d5d9c28790f1793f527dfda	0bd0f6f1464e5c3b3725a1b55774a667	0.94566
4819e8a06d5d9c28790f1793f527dfda	5f6afde2820b99deca9453b9c66a70df	0.94566
9c94712b0ac128883aeed3cf0cd696c7	7eab0a327e61cde847742596712dcadb	0.94566
9c94712b0ac128883aeed3cf0cd696c7	e8ead60320c81b952c5a45aa67271a48	0.94566
c0086f50c449526558dcbb7fd569043f	59702671fe9c6d0fafd8225d1f68bd1f	0.94566
c0086f50c449526558dcbb7fd569043f	ac2662d36a91cba0d6b8fee15d75ead0	0.94566
c0086f50c449526558dcbb7fd569043f	4edec3e2a4504a62bdc1387a9f7bcc26	0.94566
c0086f50c449526558dcbb7fd569043f	39e70d892a1b487e00ae81b7b70491af	0.94566
3b3bbab9ab17d53dd61ce47bd1aef746	a018dfb928f901a2fbc3ee62c0e7362b	0.94566
441b997bec002a7fe05e0ad7e4bfc14e	da17572657f5636c66a5ce8c2d04922f	0.94566
441b997bec002a7fe05e0ad7e4bfc14e	b34fb0904caa8c1db6df0f5cb24da6b2	0.94566
441b997bec002a7fe05e0ad7e4bfc14e	696fcd39d96eaa84510ddbb3e00d8263	0.94566
441b997bec002a7fe05e0ad7e4bfc14e	8bd33e664b9a859086f52c1737c36339	0.94566
441b997bec002a7fe05e0ad7e4bfc14e	5d0fee9c66e12c632ee634131979c10c	0.94566
441b997bec002a7fe05e0ad7e4bfc14e	337145739bb153cea3d3c53595acbf22	0.94566
441b997bec002a7fe05e0ad7e4bfc14e	0f407bb44ce651722dc620d0f9490b63	0.94566
441b997bec002a7fe05e0ad7e4bfc14e	afede6d9aa8210bc3d25c9253a7a4f84	0.94566
441b997bec002a7fe05e0ad7e4bfc14e	4cdf9aeb68a51fc2fff2f82e2e682c5b	0.94566
441b997bec002a7fe05e0ad7e4bfc14e	79b7674106bc3fb9eccf73c5bd64bfb5	0.94566
441b997bec002a7fe05e0ad7e4bfc14e	aa13b33f5e1937ef92b901d75f190fbe	0.94566
441b997bec002a7fe05e0ad7e4bfc14e	6b8146cb68c2d5021bd95561bfc0e7ee	0.94566
441b997bec002a7fe05e0ad7e4bfc14e	4975e9498ed5c0822a2f200287a6c612	0.94566
441b997bec002a7fe05e0ad7e4bfc14e	6d17ed796a25ea35dc19e67c30960976	0.94566
441b997bec002a7fe05e0ad7e4bfc14e	20dd251ae02aea592d801d239b63f9e4	0.94566
441b997bec002a7fe05e0ad7e4bfc14e	55ba03929d537e43f91aa98c36421f34	0.94566
89f40f2cb797e9fdf5984815ddc20041	7e857ab7033d8eae6b29d820ef13ebb5	0.94566
a1219c3e384b263c96f09ff1f1cea107	f6608e71c06674d8840e9cb8ccb2e74d	0.94566
a1219c3e384b263c96f09ff1f1cea107	bdb19eb6ef13bfed15a7ebb821a6d403	0.94566
a1219c3e384b263c96f09ff1f1cea107	9d510a1ee7233ab15bca064515917a04	0.94566
8bb8eb47069b3e919959aa111ba859ec	aa13b33f5e1937ef92b901d75f190fbe	0.94566
8080b535f4bf339a8d5fee285ddab60b	759ac655001806785218ecfb18b06a1d	0.94566
8080b535f4bf339a8d5fee285ddab60b	b07a379d1b16d945fac249328c0fc3d4	0.94566
8080b535f4bf339a8d5fee285ddab60b	0342f30ab678cb75dc7d44eb6d1f3c71	0.94566
6916d97494489296801671b8d18a0309	0f6006dc9edddee73c4e03a918c3aa66	0.94566
6916d97494489296801671b8d18a0309	e131d6b9e4f997788460a450a69c3a99	0.94566
6916d97494489296801671b8d18a0309	5f042513c67fdd55888051594cb486ac	0.94566
6916d97494489296801671b8d18a0309	8c68c8f1ca3ceb58bd95ff2e2f7444af	0.94566
6916d97494489296801671b8d18a0309	b092f7f3425cc2dfc9965117ab63717d	0.94566
6916d97494489296801671b8d18a0309	49c1ac3db0834e9040ad888443339e6f	0.94566
6916d97494489296801671b8d18a0309	9efb69f287a7f7fffdc3ba17b646628f	0.94566
6916d97494489296801671b8d18a0309	20dd251ae02aea592d801d239b63f9e4	0.94566
eb63b799d3c4037796161ba48a0a1f56	34b68b1ef916cbbfcf7e587bb154452d	0.94566
422efbd87a37e2b1e7b7fa621cc99374	8a13f20e0e4548413b745bf51c9980b3	0.94566
422efbd87a37e2b1e7b7fa621cc99374	58b68525f7a335fdba75a3ce75720e07	0.94566
422efbd87a37e2b1e7b7fa621cc99374	cf128de805981908ffc28e6be7a5f7e8	0.94566
422efbd87a37e2b1e7b7fa621cc99374	c4b50715602cceccd5ba14916e71bbbb	0.94566
05ee809c46ccca3097f50d1123609e5a	c1b64e9ee44cded7174eb92430f7ac95	0.94566
05ee809c46ccca3097f50d1123609e5a	d9db432ac0d299dffcadd359c0e7120b	0.94566
05ee809c46ccca3097f50d1123609e5a	675f47f52ab28cdcf30e23836997082e	0.94566
05ee809c46ccca3097f50d1123609e5a	55ba03929d537e43f91aa98c36421f34	0.94566
da17572657f5636c66a5ce8c2d04922f	b34fb0904caa8c1db6df0f5cb24da6b2	0.94566
da17572657f5636c66a5ce8c2d04922f	f6ecd0322cb47d8786f055d9bcd06354	0.94566
da17572657f5636c66a5ce8c2d04922f	64bcf94b568e9cbaa0404d841ad75435	0.94566
da17572657f5636c66a5ce8c2d04922f	696fcd39d96eaa84510ddbb3e00d8263	0.94566
da17572657f5636c66a5ce8c2d04922f	8bd33e664b9a859086f52c1737c36339	0.94566
da17572657f5636c66a5ce8c2d04922f	5d0fee9c66e12c632ee634131979c10c	0.94566
da17572657f5636c66a5ce8c2d04922f	337145739bb153cea3d3c53595acbf22	0.94566
da17572657f5636c66a5ce8c2d04922f	0f407bb44ce651722dc620d0f9490b63	0.94566
da17572657f5636c66a5ce8c2d04922f	afede6d9aa8210bc3d25c9253a7a4f84	0.94566
da17572657f5636c66a5ce8c2d04922f	4cdf9aeb68a51fc2fff2f82e2e682c5b	0.94566
da17572657f5636c66a5ce8c2d04922f	79b7674106bc3fb9eccf73c5bd64bfb5	0.94566
da17572657f5636c66a5ce8c2d04922f	a3ce2b76a5b2daccdcc5c58ee218896a	0.94566
da17572657f5636c66a5ce8c2d04922f	aa13b33f5e1937ef92b901d75f190fbe	0.94566
da17572657f5636c66a5ce8c2d04922f	6b8146cb68c2d5021bd95561bfc0e7ee	0.94566
da17572657f5636c66a5ce8c2d04922f	4975e9498ed5c0822a2f200287a6c612	0.94566
da17572657f5636c66a5ce8c2d04922f	6d17ed796a25ea35dc19e67c30960976	0.94566
da17572657f5636c66a5ce8c2d04922f	20dd251ae02aea592d801d239b63f9e4	0.94566
da17572657f5636c66a5ce8c2d04922f	55ba03929d537e43f91aa98c36421f34	0.94566
b34fb0904caa8c1db6df0f5cb24da6b2	47591358addd7be611d87aa5fb1d0501	0.94566
b34fb0904caa8c1db6df0f5cb24da6b2	64bcf94b568e9cbaa0404d841ad75435	0.94566
b34fb0904caa8c1db6df0f5cb24da6b2	696fcd39d96eaa84510ddbb3e00d8263	0.94566
b34fb0904caa8c1db6df0f5cb24da6b2	8bd33e664b9a859086f52c1737c36339	0.94566
b34fb0904caa8c1db6df0f5cb24da6b2	fa493aa4f1faf6be9820d19f83cdd969	0.94566
b34fb0904caa8c1db6df0f5cb24da6b2	5d0fee9c66e12c632ee634131979c10c	0.94566
b34fb0904caa8c1db6df0f5cb24da6b2	337145739bb153cea3d3c53595acbf22	0.94566
b34fb0904caa8c1db6df0f5cb24da6b2	0f407bb44ce651722dc620d0f9490b63	0.94566
b34fb0904caa8c1db6df0f5cb24da6b2	afede6d9aa8210bc3d25c9253a7a4f84	0.94566
b34fb0904caa8c1db6df0f5cb24da6b2	96c5f928b96ff41ecf26e1e13259fa64	0.94566
b34fb0904caa8c1db6df0f5cb24da6b2	4cdf9aeb68a51fc2fff2f82e2e682c5b	0.94566
b34fb0904caa8c1db6df0f5cb24da6b2	79b7674106bc3fb9eccf73c5bd64bfb5	0.94566
b34fb0904caa8c1db6df0f5cb24da6b2	a3ce2b76a5b2daccdcc5c58ee218896a	0.94566
b34fb0904caa8c1db6df0f5cb24da6b2	aa13b33f5e1937ef92b901d75f190fbe	0.94566
b34fb0904caa8c1db6df0f5cb24da6b2	39e70d892a1b487e00ae81b7b70491af	0.94566
b34fb0904caa8c1db6df0f5cb24da6b2	6b8146cb68c2d5021bd95561bfc0e7ee	0.94566
b34fb0904caa8c1db6df0f5cb24da6b2	6d17ed796a25ea35dc19e67c30960976	0.94566
b34fb0904caa8c1db6df0f5cb24da6b2	20dd251ae02aea592d801d239b63f9e4	0.94566
b34fb0904caa8c1db6df0f5cb24da6b2	55ba03929d537e43f91aa98c36421f34	0.94566
f77e657f16617d6eefe6c409ead568e8	94e10c92d744617d9880b78eef11a2c6	0.94566
f77e657f16617d6eefe6c409ead568e8	7fd5a794906d83f5fc04700094b52f38	0.94566
f77e657f16617d6eefe6c409ead568e8	b70898de946a803c963584e6b7b27bea	0.94566
f77e657f16617d6eefe6c409ead568e8	51262c0e7e875ebe8e03cf077ac177c5	0.94566
f77e657f16617d6eefe6c409ead568e8	f5894077625c801e89b4365be5964095	0.94566
f77e657f16617d6eefe6c409ead568e8	4ec07abdb860bda723972447dfa55ddc	0.94566
f77e657f16617d6eefe6c409ead568e8	ccedbacba71f5225e8911acbd4552b5d	0.94566
f77e657f16617d6eefe6c409ead568e8	3fc31391229b05e4b66e7950f1548840	0.94566
f77e657f16617d6eefe6c409ead568e8	9fc85a26ba4e62372a0510e76a6e616b	0.94566
f77e657f16617d6eefe6c409ead568e8	6b8146cb68c2d5021bd95561bfc0e7ee	0.94566
f77e657f16617d6eefe6c409ead568e8	1b6b519d3d862ee5aa5f5fb031cbedd7	0.94566
f77e657f16617d6eefe6c409ead568e8	65cfe8b097fd708eaba653545f8f8e69	0.94566
f77e657f16617d6eefe6c409ead568e8	8c357abf174733947c627dde698d3f93	0.94566
94e10c92d744617d9880b78eef11a2c6	7fd5a794906d83f5fc04700094b52f38	0.94566
94e10c92d744617d9880b78eef11a2c6	b70898de946a803c963584e6b7b27bea	0.94566
94e10c92d744617d9880b78eef11a2c6	51262c0e7e875ebe8e03cf077ac177c5	0.94566
94e10c92d744617d9880b78eef11a2c6	f5894077625c801e89b4365be5964095	0.94566
94e10c92d744617d9880b78eef11a2c6	4ec07abdb860bda723972447dfa55ddc	0.94566
94e10c92d744617d9880b78eef11a2c6	ccedbacba71f5225e8911acbd4552b5d	0.94566
94e10c92d744617d9880b78eef11a2c6	3fc31391229b05e4b66e7950f1548840	0.94566
94e10c92d744617d9880b78eef11a2c6	9fc85a26ba4e62372a0510e76a6e616b	0.94566
94e10c92d744617d9880b78eef11a2c6	6b8146cb68c2d5021bd95561bfc0e7ee	0.94566
94e10c92d744617d9880b78eef11a2c6	1b6b519d3d862ee5aa5f5fb031cbedd7	0.94566
94e10c92d744617d9880b78eef11a2c6	65cfe8b097fd708eaba653545f8f8e69	0.94566
94e10c92d744617d9880b78eef11a2c6	8c357abf174733947c627dde698d3f93	0.94566
7eab0a327e61cde847742596712dcadb	e8ead60320c81b952c5a45aa67271a48	0.94566
10a0616a1ba9f2e05f568691c634744d	0e17c2c7eab35099465e8d4b48d8afd8	0.94566
10a0616a1ba9f2e05f568691c634744d	8c68c8f1ca3ceb58bd95ff2e2f7444af	0.94566
10a0616a1ba9f2e05f568691c634744d	8c2a1eaecbc549497c8b1debe067b2fa	0.94566
6f2548da34731900e68ee1bbeed4a579	82c9e178eb04788207c4d1da199ee71b	0.94566
6f2548da34731900e68ee1bbeed4a579	44de42967ac70282bc8850cc2a9647ce	0.94566
6f2548da34731900e68ee1bbeed4a579	93c1449aef105c81ee44691574a04fa6	0.94566
0e17c2c7eab35099465e8d4b48d8afd8	8c68c8f1ca3ceb58bd95ff2e2f7444af	0.94566
0e17c2c7eab35099465e8d4b48d8afd8	8c2a1eaecbc549497c8b1debe067b2fa	0.94566
8a13f20e0e4548413b745bf51c9980b3	58b68525f7a335fdba75a3ce75720e07	0.94566
8a13f20e0e4548413b745bf51c9980b3	1dad302680b9cc2a56187e8bdfb1cf58	0.94566
8a13f20e0e4548413b745bf51c9980b3	6541e91fe6c7318b063690b1da719852	0.94566
8a13f20e0e4548413b745bf51c9980b3	cf128de805981908ffc28e6be7a5f7e8	0.94566
[truncated: 390 more rows]

## Sheet: S7-SV-IDs
Table S7: All SVs identified by QIIME2 and Deblur and their associated taxonomy according to the SILVA database.
SV ID	Domain	Phylum	Subphylum	Class	Order	Family	Genus
56dfd9d7e24de5f67e68506768209dca	Bacteria	Proteobacteria	Gammaproteobacteria	Alteromonadales	Alteromonadaceae	SAR92 clade
d44907acb061d2f9dc126e3cf75b25ba	Archaea	Euryarchaeota	Halobacteria	Halobacteriales	Deep Sea Hydrothermal Vent Gp 6(DHVEG-6)	uncultured euryarchaeote
21016d483ef53573ef51f02361a44f4a	Bacteria	Proteobacteria	Betaproteobacteria	Methylophilales	Methylophilaceae	OM43 clade	uncultured bacterium
750cbe165ed5ca17e2d5d11c38183467	Bacteria	Bacteroidetes	Flavobacteriia	Flavobacteriales	Flavobacteriaceae
88f9ec475057a64bf4002030270aea28	Bacteria	Proteobacteria	Deltaproteobacteria	Myxococcales	0319-6G20	uncultured proteobacterium
8b17dc24e50d2dc95225eab2c1a87f23	Bacteria	Cyanobacteria
4dbdeec2cb7efc16b7cf63149d664cf6	Bacteria
b70be5bb4ce0ffd9ac2c72038753e702	Bacteria
f1dd1bbb2b0ce8bcad3ed39593851859	Bacteria	Verrucomicrobia	Opitutae	MB11C04 marine group	uncultured bacterium
36b3d793a3ebf82eac5bf07eeebd476b	Bacteria	Bacteroidetes	Flavobacteriia	Flavobacteriales	Flavobacteriaceae	Robiginitalea
c26492d50d9b41c7c5051745246e4d58	Bacteria	Proteobacteria	Deltaproteobacteria	Desulfobacterales	Desulfobacteraceae	Desulfobacter
f069bbede3f9eaa9d41e33d6c085821b	Bacteria	Proteobacteria	Epsilonproteobacteria	Campylobacterales	Helicobacteraceae	Sulfurimonas
5249b2f97c8d63c67a14cb2444d6e6b0	Bacteria	Fusobacteria	Fusobacteriia	Fusobacteriales	Fusobacteriaceae	Propionigenium	uncultured bacterium
9e7db1ab8210ac6941073fd0f1ff72d1	Bacteria	Bacteroidetes	Cytophagia	Cytophagales	Flammeovirgaceae	uncultured
252d40b54619d8d7fde40ff342f7fc3f	Bacteria	Bacteroidetes	Cytophagia	Cytophagales
a3a39c55a5ca46d938e682cd55dabcf0	Bacteria
7dd596daf6174ac30ac77af953519827	Bacteria	Bacteroidetes	Sphingobacteriia	Sphingobacteriales	Saprospiraceae	Lewinella	uncultured organism
31368b161b788cc2651bb17eb1d26c56	Bacteria	Proteobacteria	Gammaproteobacteria	Order Incertae Sedis	Family Incertae Sedis	Marinicella	uncultured marine bacterium
4521bebdc60951cdc36981d163233185	Bacteria	Verrucomicrobia	Verrucomicrobiae	Verrucomicrobiales	Verrucomicrobiaceae	Persicirhabdus	uncultured bacterium
e209928576629d90c305bcb9bcde90af	Bacteria	Proteobacteria	Alphaproteobacteria	Rickettsiales	SAR116 clade	Candidatus Puniceispirillum	uncultured bacterium
8084e2e1269c7f8049db0d8047cc07fb	Bacteria	Proteobacteria	Gammaproteobacteria	Pseudomonadales	Pseudomonadaceae	Pseudomonas	Pseudomonas citronellolis
13f9fefcb5b885b071160a47dfa3a017	Bacteria	Proteobacteria	Gammaproteobacteria
ca0ef16ea772060cc0bcc54428f9c1d3	Bacteria	Bacteroidetes	Flavobacteriia	Flavobacteriales	Flavobacteriaceae	Tenacibaculum	uncultured bacterium
6fc201e6cd93252ad1cfab6ea1ab77ce	Bacteria	Bacteroidetes	BD2-2	uncultured Bacteroidetes bacterium
8a09e9d10fc0b9214217736b0f60eb6e	Bacteria	Proteobacteria	Gammaproteobacteria	Alteromonadales
b56323d12ab7ad005e776c94ee7ecbb3	Bacteria	Verrucomicrobia	Opitutae	Puniceicoccales	Puniceicoccaceae	Cerasicoccus
827e158b58edb9143492782dd442a065	Bacteria	Proteobacteria	Gammaproteobacteria	Vibrionales	Vibrionaceae	Vibrio
f208186abff4b3185d1c977de802a5da	Bacteria	Proteobacteria	Deltaproteobacteria	Desulfuromonadales	GR-WP33-58
0d5e635df614a9c9a7b42ca3500c0d3c	Bacteria	Proteobacteria	Alphaproteobacteria	Rhodobacterales	Rhodobacteraceae
82e8a126ec624fdb13b644cbce37aaca	Bacteria	Chlorobi	Chlorobia	Chlorobiales	OPB56	uncultured bacterium
65feb1f1e3c046d55f74783b19e6c993	Bacteria	Bacteroidetes	Cytophagia	Cytophagales	Flammeovirgaceae	Flexithrix	uncultured bacterium
4fb93721aec666cb59870bbc3211264f	Bacteria	Proteobacteria	Gammaproteobacteria
36c542375a8bbe47f1ac5c1dc0d0fed3	Bacteria	Cyanobacteria
1b0915700ee0b5116c96c7a5883ef825	Bacteria	Bacteroidetes	Sphingobacteriia	Sphingobacteriales	Chitinophagaceae	uncultured	uncultured Sphingobacteria bacterium
b9d507fdd120f6930cb77be2a8f6b68d	Bacteria	Proteobacteria	Alphaproteobacteria	Rhodobacterales	Rhodobacteraceae
382c68464d790de6ed033ad848a03fb7	Bacteria	Proteobacteria	Alphaproteobacteria	Rhodobacterales	Rhodobacteraceae	Salinihabitans	uncultured bacterium
16394a43583aa6301d216c47c0168363	Bacteria	Verrucomicrobia	Opitutae	Puniceicoccales	Puniceicoccaceae	Lentimonas	uncultured bacterium
81ef212a364d5d56a0d9c8cdaefa05be	Bacteria	Proteobacteria	Alphaproteobacteria	OCS116 clade	uncultured bacterium
3e7f8f0a4ffc3f1da6a217394af6752a	Bacteria	Planctomycetes	Planctomycetacia	Planctomycetales	Planctomycetaceae	Planctomyces
6424d26fbaf8cce843ca6c3fb974f90a	Bacteria	Planctomycetes	Planctomycetacia	Planctomycetales	Planctomycetaceae	Planctomyces	Planctomyces sp.
3581406d8e0d96b468d400cf9c49c8a1	Bacteria
2b35508b4e319298a088c9a20f5cf1b1	Bacteria	Proteobacteria	Alphaproteobacteria	Rhizobiales	Rhodobiaceae	Rhodobium	uncultured alpha proteobacterium
2df027f1916ba6adc16236ddf0fb17a6	Bacteria	Bacteroidetes	Flavobacteriia	Flavobacteriales	Flavobacteriaceae	NS5 marine group	uncultured bacterium
ee127d2b4880fc0a1f416d3c6907bfea	Bacteria	Bacteroidetes	Flavobacteriia	Flavobacteriales	Flavobacteriaceae	Winogradskyella	uncultured bacterium
8d74b788e8becf378938969d3e9f10bc	Bacteria	Proteobacteria	Alphaproteobacteria	Rickettsiales	SAR116 clade	Candidatus Puniceispirillum	uncultured bacterium
a34cbe9b30498b9c31eb71cea0584b56	Bacteria	Bacteroidetes	Flavobacteriia	Flavobacteriales	Flavobacteriaceae	Winogradskyella	uncultured bacterium
319f2736f9916f51771bb92cc43700aa	Bacteria	Acidobacteria	Holophagae	Subgroup 23	uncultured bacterium
ad310229cc4b6c354d351fa861d81d49	Bacteria	Cyanobacteria	Cyanobacteria	SubsectionI	FamilyI	Synechococcus	unidentified marine bacterioplankton
7a1431384de99db0d1d0a676d7f8703f	Bacteria	Proteobacteria	Deltaproteobacteria	Bdellovibrionales	Bdellovibrionaceae	OM27 clade	uncultured bacterium
1ca8fd3fd7cc70807c80afba3935686e	Bacteria	Proteobacteria	Deltaproteobacteria	Bdellovibrionales	Bdellovibrionaceae	OM27 clade
6bb3cfdda2d01ec3bae2be8e68c469e4	Bacteria
90fc2a9f2bc6b1943c254f93cc1a2f65	Bacteria	Proteobacteria	Alphaproteobacteria	SAR11 clade	Surface 4	uncultured bacterium
3390427949b331f13a75b75418e29e2b	Bacteria	Bacteroidetes	Flavobacteriia	Flavobacteriales
a90e3b691738b7aa64868ab8d00bea6d	Bacteria	Proteobacteria	Deltaproteobacteria	Bdellovibrionales	Bdellovibrionaceae	OM27 clade	uncultured bacterium
227c53e0a395b41c78f773432238f900	Bacteria	Proteobacteria	Gammaproteobacteria	Oceanospirillales
932c94ef9ab7cd5dbb25803383b81a78	Bacteria	Bacteroidetes	Flavobacteriia	Flavobacteriales	Flavobacteriaceae	NS5 marine group	uncultured bacterium
e8af3d6db005db60f79394d7df7e4701	Bacteria	Firmicutes
1a716e0e7d4042bc4aaae40642904551	Bacteria	Proteobacteria	Deltaproteobacteria	Myxococcales	0319-6G20
ff6a113a983d5b191af8200e3dd8d24e	Bacteria	Proteobacteria	Gammaproteobacteria	Thiotrichales	Thiotrichaceae	uncultured	uncultured gamma proteobacterium
d127f00c91d8278183df0c94544bd583	Bacteria	Proteobacteria	Deltaproteobacteria	Bdellovibrionales	Bdellovibrionaceae	OM27 clade	uncultured marine microorganism
22d2aec35c7947f7b26c42c4471e6681	Bacteria	Planctomycetes	Planctomycetacia	Planctomycetales	Planctomycetaceae	Rhodopirellula	uncultured planctomycete
572fe748af233a13bfa798d74509824f	Bacteria	Bacteroidetes	Sphingobacteriia	Sphingobacteriales	Saprospiraceae
f322ca331475f9f8e883a0bc356b5c64	Bacteria	Bacteroidetes	Flavobacteriia	Flavobacteriales	NS7 marine group	uncultured bacterium
1accae36ccbba92d4206b97bb3f7c88d	Bacteria	Proteobacteria	Epsilonproteobacteria	Campylobacterales	Campylobacteraceae	Arcobacter	uncultured Arcobacter sp.
00031127e3424bf52604729f97299274	Bacteria	Verrucomicrobia	Opitutae	Puniceicoccales	Puniceicoccaceae	Lentimonas	uncultured bacterium
20cc9d134cc89f1b62860bf6bdd4046d	Bacteria	Bacteroidetes	Cytophagia	Cytophagales	Flammeovirgaceae	Fabibacter	uncultured bacterium
875461f54aca148b3997a7365b9a53c7	Bacteria	Bacteroidetes
e92f6b23305b0d2751ffb8542f70b7b5	Bacteria	Proteobacteria	Deltaproteobacteria	Bdellovibrionales	Bacteriovoracaceae
8b05f5ad039939915cea68ea66fa75e4	Bacteria	Verrucomicrobia	Opitutae	MB11C04 marine group	uncultured bacterium
406341d9ad9f7ce8a9f043fcad943dac	Bacteria	Verrucomicrobia	Verrucomicrobiae	Verrucomicrobiales	DBS1	uncultured organism
6d4e5244d391b92ae390a0c5f1c15a6a	Bacteria	Deferribacteres	Deferribacteres	Deferribacterales	SAR406 clade(Marine group A)	uncultured bacterium
0b2808f719e35f42d52fba08df16ea0e	Bacteria	Bacteroidetes	Sphingobacteriia	Sphingobacteriales	Saprospiraceae	uncultured
82ab1c4ae0247432ba9b9493cfbc6b14	Bacteria	Planctomycetes	Planctomycetacia	Planctomycetales	Planctomycetaceae	uncultured	uncultured planctomycete
880f19723e37a17e038c37be8f22c3a8	Bacteria	Proteobacteria	Alphaproteobacteria
0da97dfd5c938f548f224257b311b962	Bacteria	Verrucomicrobia	Verrucomicrobiae	Verrucomicrobiales	DEV007
fed75833daf5ab33e23b2bf6f6ce1d33	Bacteria	Proteobacteria	Deltaproteobacteria	Desulfuromonadales	GR-WP33-58
3e41983fcb08dcd81c0e62a33bfccdc7	Bacteria	Bacteroidetes	Sphingobacteriia	Sphingobacteriales	Saprospiraceae	uncultured
5e7acee8b90122fbb484759e2cd5de43	Bacteria	Proteobacteria	Gammaproteobacteria	Oceanospirillales	Oleiphilaceae	Oleiphilus
70d97de680664e76b509834800991031	Bacteria
0d07a7b87f371147fee60c5601f7e842	Bacteria	Proteobacteria	Gammaproteobacteria	Chromatiales	Ectothiorhodospiraceae	Acidiferrobacter
a1a830867e5263c7c5a346034d0665dd	Bacteria	Deferribacteres	Deferribacteres	Deferribacterales	SAR406 clade(Marine group A)	marine metagenome
66cd4014b1589880a46c190ac2fbcb49	Bacteria	Bacteroidetes	Bacteroidia	Bacteroidales	Marinilabiaceae	uncultured
3472ce6a48ed3e428f8ac8f3ec3869a3	Bacteria	Bacteroidetes	Flavobacteriia	Flavobacteriales	Cryomorphaceae	Owenweeksia
0cfbbce1bda6e56fd6630bad1e832505	Bacteria	Proteobacteria	Deltaproteobacteria	Myxococcales	Sandaracinaceae	uncultured delta proteobacterium
43e574de91af1e788da7eab3023cb251	Bacteria	Proteobacteria	TA18
f931e335640e3ebe87095aa836db5a05	Bacteria	Bacteroidetes	Flavobacteriia	Flavobacteriales	Flavobacteriaceae	Robiginitalea
6144a85c82e8a1270fcf3d3d9e75a21f	Bacteria	Actinobacteria	Acidimicrobiia	Acidimicrobiales	Acidimicrobiaceae	Ilumatobacter	uncultured bacterium
a2bfa389e4909bd132f3a8450c97ae9c	Bacteria	Proteobacteria	Alphaproteobacteria	Rhodobacterales	Rhodobacteraceae
0a35faf6cbcfae24b7eaebccac354133	Bacteria	Verrucomicrobia	Opitutae	MB11C04 marine group	uncultured bacterium
6aa1d95a0d4764b83e0925b3122274ed	Bacteria	Planctomycetes	Phycisphaerae	Phycisphaerales	Phycisphaeraceae	Phycisphaera	uncultured Planctomycetales bacterium
c4b95a9b5ca76755b59ccd86ae6deba0	Archaea	Euryarchaeota	Thermoplasmata	Thermoplasmatales	Marine Group II
cb580583ea3fdb75c58a573e23f3b42e	Bacteria	Planctomycetes	Planctomycetacia	Planctomycetales	Planctomycetaceae	Planctomyces
34e6c701e966d0b2fbace48db4ec4129	Bacteria	Proteobacteria	Alphaproteobacteria
aafcb8286072f743504c5ffde9d97035	Bacteria	Proteobacteria	Gammaproteobacteria	Alteromonadales	Alteromonadaceae	OM60(NOR5) clade
458be152e26161a413024ea884a040eb	Bacteria
2c2f402184f01023156b6d98a98e472d	Bacteria	Planctomycetes	Planctomycetacia	Planctomycetales	Planctomycetaceae	Rhodopirellula	uncultured bacterium
a05ba1ba10f7ad7834d8ae32490b920c	Bacteria	Proteobacteria	Alphaproteobacteria	Rhodobacterales	Rhodobacteraceae	uncultured
b475a68530c2ba476b101de043b1285f	Bacteria	Lentisphaerae	Oligosphaeria
b1755448b75060d607cb052b2683eb0a	Bacteria	Proteobacteria	Betaproteobacteria	Burkholderiales
806f07222b2ee06190d1ed0232cb1246	Bacteria	Proteobacteria	Gammaproteobacteria	Vibrionales	Vibrionaceae	Vibrio
ce851835782c77fa754b92d567741d8d	Bacteria	Proteobacteria	Deltaproteobacteria	Bdellovibrionales	Bacteriovoracaceae	Peredibacter	uncultured Bacteriovorax sp.
d38674f9ece1681395581aa48e781b1f	Bacteria	Proteobacteria	Gammaproteobacteria	Oceanospirillales	Alcanivoracaceae	Alcanivorax	uncultured bacterium
9ff870beffc06840cef39de196bcc29e	Bacteria	Bacteroidetes	Sphingobacteriia	Sphingobacteriales	NS11-12 marine group	uncultured marine bacterium
0e7eb37db2c3f531c29414ce916a151e	Bacteria	Planctomycetes	Planctomycetacia	Planctomycetales	Planctomycetaceae	Pirellula
82b9915acaaf0712435a0f907ace99b6	Bacteria	Bacteroidetes	Flavobacteriia	Flavobacteriales	Cryomorphaceae	Fluviicola	uncultured bacterium
e11b4263eb7a82f04b0bc4333a6bad57	Bacteria	Proteobacteria	Deltaproteobacteria	SAR324 clade(Marine group B)	uncultured bacterium
fdf673791a1beb3f2d6bd09343085aa0	Bacteria	Bacteroidetes	Flavobacteriia	Flavobacteriales	Flavobacteriaceae	NS5 marine group
ef5c4150d04cfd0b8e933109ab11a4d6	Bacteria	Bacteroidetes	Cytophagia	Cytophagales	Flammeovirgaceae
89961531d6eeff5c9c0be5d7c49a2d9a	Bacteria	Proteobacteria	Alphaproteobacteria	Rhodobacterales	Rhodobacteraceae	Ruegeria
9b8b10cc7c49ae9fd35b4d597b2c0257	Bacteria	Bacteroidetes	Cytophagia	Cytophagales	Flammeovirgaceae	Reichenbachiella	uncultured bacterium
bf4864246283a3df9d2d93cd25ea6c74	Bacteria	Proteobacteria	Deltaproteobacteria
fe6a6c1b9e37ef8c4f630ab9718b2eb9	Bacteria	Bacteroidetes	Cytophagia	Order III	uncultured	uncultured bacterium
cc9e1a80970c46d00398c39fd74f2a2b	Bacteria	Proteobacteria	Gammaproteobacteria	Alteromonadales	Alteromonadaceae
c8fb99922deb4672e76bc9205f13fae2	Bacteria	Bacteroidetes	Flavobacteriia	Flavobacteriales
4b3f86037c4071fc90961b309b6653a7	Bacteria	Bacteroidetes	Flavobacteriia	Flavobacteriales	Flavobacteriaceae	Muricauda	uncultured bacterium
bf486bb1d9da587f9f41912eee4b2e77	Bacteria	Planctomycetes	Planctomycetacia	Planctomycetales	Planctomycetaceae	Planctomyces
9a9c72fade7074b9d85aebd9c40e182c	Bacteria	Verrucomicrobia	OPB35 soil group
5d4637e6bc731530d4e85609c34df22e	Bacteria	Bacteroidetes	Flavobacteriia	Flavobacteriales	NS9 marine group	uncultured bacterium
69a038a32cdce0e9c59aa15868003dc0	Bacteria	Bacteroidetes	Flavobacteriia	Flavobacteriales	Cryomorphaceae	Fluviicola	uncultured bacterium
c5110bc820a22854866d6b5ee21344c2	Bacteria	Proteobacteria	Alphaproteobacteria	Rhodobacterales	Rhodobacteraceae	uncultured
b1624c5bb53bbd17d8f403e90999720b	Bacteria
012a40b76058db2b9dc546e8b24e7359	Bacteria	Bacteroidetes	Flavobacteriia	Flavobacteriales	Flavobacteriaceae
fe7499a7a35a138eb763e5805c0e1ffc	Bacteria	Bacteroidetes	Sphingobacteriia	Sphingobacteriales	Saprospiraceae	uncultured
c824e808b7a8c64946538e9eb6d48fbc	Bacteria	Bacteroidetes	Flavobacteriia	Flavobacteriales	Cryomorphaceae	Owenweeksia	uncultured bacterium
95443d04714a59e054cf924eb2d67431	Bacteria	Proteobacteria	Deltaproteobacteria	Myxococcales	0319-6G20
5451d510f6989eb29028ea625b9b55ae	Bacteria	Proteobacteria	Deltaproteobacteria
ffd535681b252041f8b55288a38baa87	Bacteria	Bacteroidetes	Sphingobacteriia	Sphingobacteriales	Saprospiraceae
6dbadb6844128f6487ebf4027fff477a	Bacteria	Bacteroidetes	Cytophagia	Cytophagales
79e9e337b10e2d298bb1b3bde946782d	Bacteria	Proteobacteria	Gammaproteobacteria	Enterobacteriales	Enterobacteriaceae	Escherichia-Shigella
41c9d3c304cb7e1df51ed36bfe444e71	Bacteria	Bacteroidetes	Flavobacteriia	Flavobacteriales
8cf51cdf7c7c33f95196eed87ff337de	Bacteria	Verrucomicrobia	Opitutae	MB11C04 marine group	uncultured bacterium
e61dc8b9c40c69a85fb757d7b44b70d2	Bacteria	Bacteroidetes	Flavobacteriia	Flavobacteriales	Flavobacteriaceae	Winogradskyella	uncultured bacterium
d2ab948d10088c5dc2d6ebc1858bc08a	Bacteria	Actinobacteria	Actinobacteria	PeM15	uncultured bacterium
f7e6c08a092ded8ff3312cab3b1b2f2d	Bacteria	Bacteroidetes	Flavobacteriia	Flavobacteriales	Flavobacteriaceae	uncultured
40a3d5eb1bbf06dd8a8a58bcdc643058	Bacteria	Proteobacteria	Gammaproteobacteria	Vibrionales	Vibrionaceae	Vibrio	Vibrio cholerae
e1e98c4e43e4bc3a56d9b41319b33882	Bacteria	Cyanobacteria	Cyanobacteria	SubsectionI	FamilyI	Synechococcus
e911df48134a50b41b9b70800b26e952	Bacteria	Proteobacteria	Alphaproteobacteria	Rhodospirillales	Rhodospirillaceae	Nisaea	uncultured bacterium
238ab538f3a24baa2883647052dd2318	Bacteria	Proteobacteria	Alphaproteobacteria	Rhizobiales	Phyllobacteriaceae	Pseudahrensia	uncultured bacterium
a18f563b60ef31afe1d5aaf0b4331f3d	Bacteria	Verrucomicrobia	Verrucomicrobiae	Verrucomicrobiales	DEV007	uncultured bacterium
b4d1a4c4d74347810e73470ea6a7e7e1	Bacteria	Proteobacteria	Gammaproteobacteria	Alteromonadales
4f22de5b31c431a4419bb0c4aa6e23a3	Bacteria	Proteobacteria	Gammaproteobacteria
e577a29f0e642142678e3336b0404b24	Bacteria
2bb7aa33cde3d64dea5e79e7d2f22046	Bacteria	Proteobacteria	TA18	uncultured organism
56e3993ba483457f7f9c7971984689a8	Bacteria	Proteobacteria	Deltaproteobacteria	Bdellovibrionales	Bacteriovoracaceae
60d593dcc8007742d4962bd8ab803953	Bacteria	Bacteroidetes	Flavobacteriia	Flavobacteriales	Cryomorphaceae	Owenweeksia
dd5c40d467b6d61b37a4f9f9d154e6c1	Bacteria	Bacteroidetes	VC2.1 Bac22	uncultured Bacteroidetes bacterium
8e5281a27251d237ae4b293a88ea1fca	Bacteria	Proteobacteria	Deltaproteobacteria	Bdellovibrionales	Bacteriovoracaceae	Peredibacter	uncultured bacterium
c3b7bf0e9723ee25d30372e02f56677d	Bacteria	Proteobacteria	Betaproteobacteria
f442143468f99eaa62a01a7bdf325409	Bacteria	Proteobacteria	Deltaproteobacteria	Desulfuromonadales	GR-WP33-58
3973bb919ef5f6f485a77988e67b9866	Bacteria	Proteobacteria	Alphaproteobacteria	OCS116 clade
f1fec4dfaa2202d002a437cc4a248e66	Bacteria	Bacteroidetes	Flavobacteriia	Flavobacteriales	Flavobacteriaceae	Formosa
7ee97d95e00cb93ca7618c360fb50a46	Bacteria	Planctomycetes	Planctomycetacia	Planctomycetales	Planctomycetaceae	Planctomyces	uncultured organism
58dc27f2b74613aea2454e8da6e2b0e5	Bacteria	Proteobacteria	Gammaproteobacteria
53b359329adc6fecebfc0eb42b6c0e71	Bacteria	Proteobacteria	Alphaproteobacteria	Rickettsiales	Rickettsiaceae	uncultured	uncultured bacterium
2c0e75b7dd596dc5e7c4226a4cf528d6	Bacteria	Proteobacteria	Alphaproteobacteria	Rickettsiales	Rickettsiaceae	uncultured	uncultured bacterium
f0ad8d0f7539cbfc185f437bd21f0e0f	Bacteria	Proteobacteria	Betaproteobacteria	Burkholderiales	Alcaligenaceae	MWH-UniP1 aquatic group	uncultured bacterium
493972dbac72c6de5d9e0713cb321192	Bacteria	Proteobacteria	Deltaproteobacteria	Desulfuromonadales	GR-WP33-58	uncultured bacterium
66be38a149899376f87698c31897e4dc	Bacteria	Proteobacteria	Epsilonproteobacteria	Campylobacterales	Campylobacteraceae	Arcobacter
2265a564eb3d7c2e1660a58fa49aae64	Bacteria	Proteobacteria	Deltaproteobacteria	Bdellovibrionales	Bdellovibrionaceae	OM27 clade	uncultured bacterium
7cf3e13f23af8684f26c6e43e65f2229	Bacteria	Proteobacteria	Deltaproteobacteria	Bdellovibrionales	Bacteriovoracaceae	Peredibacter	uncultured bacterium
1d78541e3f84d7eb176505ae4309616e	Bacteria	Proteobacteria	Milano-WF1B-44	uncultured bacterium
0609cae0d22b9be43227c4d27db071a9	Bacteria
10cafae652226d770ad0a3f797404605	Bacteria	Proteobacteria	Gammaproteobacteria	Vibrionales	Vibrionaceae	Photobacterium	uncultured bacterium
3cb8694ff15e6edee5f2eb61a64c0aa9	Bacteria
b800ef37e180548cc94019d2c15a2d8d	Bacteria	Proteobacteria	Gammaproteobacteria	Oceanospirillales	Oceanospirillaceae	Marinobacterium	uncultured bacterium
6dfadde7fb5268d8c6b03f5820ed9540	Bacteria	Proteobacteria	Deltaproteobacteria	Bdellovibrionales	Bacteriovoracaceae	Peredibacter	uncultured bacterium
fe55a2a9399891b5d85be7e695ebf130	Bacteria	Planctomycetes	Planctomycetacia	Planctomycetales	Planctomycetaceae	uncultured	uncultured planctomycete
60c0b3ef3f120e37a029f9f74dd4fe22	Bacteria	Proteobacteria	Gammaproteobacteria	Alteromonadales	Alteromonadaceae	Luminiphilus	uncultured marine bacterium
c8c8ea56f3ae80111398026c01494c51	Unassigned
0ad88eda91ad12012d4642bbb446f45b	Bacteria	Bacteroidetes	Flavobacteriia	Flavobacteriales	Cryomorphaceae	NS10 marine group	uncultured bacterium
5b8c53b45628e707e86df199c7a30891	Bacteria	Proteobacteria	Betaproteobacteria	Methylophilales	Methylophilaceae	OM43 clade
82e4b4a214f2418f9f684f6e28464431	Bacteria	Proteobacteria	Alphaproteobacteria	Rickettsiales	SAR116 clade	uncultured bacterium
86b2330bed886db04003f3661fb61d5b	Bacteria	Bacteroidetes	Cytophagia	Order III
733e7d6a3db4d4a5ec59f162c56f4f2f	Bacteria	Cyanobacteria
0a967780321add1ec3dc358acb17b3ff	Bacteria
3ceb758c49920cee71fe6e65c3493a43	Bacteria	Bacteroidetes	Flavobacteriia	Flavobacteriales	Flavobacteriaceae	Tenacibaculum	uncultured bacterium
da84b875691faabf9bc768ea4ed6851a	Bacteria	Fusobacteria	Fusobacteriia	Fusobacteriales	Fusobacteriaceae	Propionigenium	uncultured bacterium
5a6ac5dc72f33d90bc3e9891f2564f84	Bacteria	Bacteroidetes	Flavobacteriia	Flavobacteriales	Flavobacteriaceae	Actibacter	uncultured bacterium
a1811e63ebfb3d5c43fe142ae76a9829	Bacteria
e8e41c3bffbc0882edeb85a4a6a7eb94	Bacteria	Proteobacteria	Alphaproteobacteria	Rickettsiales	SAR116 clade	unidentified marine bacterioplankton
6da1bdc418fc5a975efb47a576873c10	Bacteria	Verrucomicrobia	Verrucomicrobiae	Verrucomicrobiales	DEV007	uncultured bacterium
9c941d1bd9eaa2157cf519e2fc7d1aed	Bacteria	Proteobacteria	Gammaproteobacteria
76724ec61b22f16537bbbbd43b445a69	Bacteria	Proteobacteria	Deltaproteobacteria	Bdellovibrionales	Bdellovibrionaceae	OM27 clade	uncultured delta proteobacterium
5656b737706ec07029a2669e0c1f904b	Bacteria	Proteobacteria	Deltaproteobacteria	Desulfuromonadales	GR-WP33-58
eeeb45843f64319e01fd481e960df0b7	Bacteria	Cyanobacteria	Cyanobacteria	SubsectionI	FamilyI	Synechococcus
b8935cf8c721c8307990df45b0205b49	Bacteria	Proteobacteria
7cbb796bd9964d3c01efc9e93d81267a	Bacteria	Proteobacteria	Deltaproteobacteria	Bdellovibrionales	Bdellovibrionaceae	OM27 clade	uncultured bacterium
bee6c2d572a23973ad932f48649b4e8c	Bacteria	Proteobacteria	Alphaproteobacteria	Rickettsiales	SAR116 clade
3322e10165f8c2aec38b99cfd96365db	Bacteria	Bacteroidetes	Cytophagia	Cytophagales	Flammeovirgaceae	Reichenbachiella
7409eaaf09c8e9b352cb2ffe54464e03	Bacteria	Verrucomicrobia	Opitutae	Puniceicoccales	Puniceicoccaceae	Lentimonas	uncultured bacterium
4d87d614337faa60df423f918a0978b3	Bacteria	Proteobacteria	Gammaproteobacteria	Oceanospirillales	OM182 clade
a05b4132693ef98f5b42d4e02856b885	Bacteria
d309d639912b9c368bc80e4a5c48bae2	Bacteria	Cyanobacteria	Cyanobacteria	SubsectionI	FamilyI	Synechococcus	unidentified marine bacterioplankton
cc8866f3920c1a4759b779a2afe615fa	Bacteria	Bacteroidetes	Cytophagia	Cytophagales	Flammeovirgaceae	Marinoscillum	uncultured organism
6f70debd4104b757c7e5f04924734907	Bacteria	Proteobacteria	Gammaproteobacteria
412cc84ce1498121494d74a1e0145cf1	Bacteria	Proteobacteria	Gammaproteobacteria
a81a27d5d05e396e083295ac7704974c	Bacteria	Proteobacteria	Deltaproteobacteria	Bdellovibrionales	Bdellovibrionaceae	OM27 clade	uncultured proteobacterium
a8804d65d0ea95f1b73a643fc8cd2abd	Bacteria	Proteobacteria	Gammaproteobacteria	Alteromonadales	Alteromonadaceae
6914f32d9ee2679f7f74b6d5f8f1e9e7	Bacteria	Verrucomicrobia	Opitutae	Puniceicoccales	Puniceicoccaceae
7fdf9f5c5fdfefda8e9dd8479f487728	Bacteria	Proteobacteria	Gammaproteobacteria	Vibrionales	Vibrionaceae	uncultured	uncultured bacterium
6f238652cf90cc4851568fdd04c51acf	Bacteria	Proteobacteria	Gammaproteobacteria	Thiotrichales	Francisellaceae	Francisella	uncultured bacterium
b02cb547b80f488db8e691c9a562f264	Bacteria	Chloroflexi	Anaerolineae	Anaerolineales	Anaerolineaceae	uncultured
dbfcd916937526065e7ad8120f2ed360	Bacteria	Proteobacteria	Alphaproteobacteria	DB1-14	uncultured bacterium
9563ff6b5b1d869e52a5f98d8d41b710	Bacteria	Bacteroidetes	Flavobacteriia	Flavobacteriales	Cryomorphaceae	Owenweeksia
1e3a2aad4f8f247c7245ee7836ba20bd	Bacteria	Cyanobacteria	Melainabacteria	Caenarcaniphilales	uncultured cyanobacterium
8f3da6f5123d3c51c09d1d9b262d1f92	Bacteria
df7464bf3c4d33f89113e3357c1a5f7c	Bacteria	Proteobacteria	Gammaproteobacteria	Vibrionales	Vibrionaceae	Vibrio
1c926ca8fd259c89ece07dfe79c62dfa	Bacteria	Proteobacteria	Gammaproteobacteria
a9fe2fa970bc4b6487df11daf151ee81	Bacteria
024695ddb541b3a8602e7c2abe584450	Bacteria	Bacteroidetes	Flavobacteriia	Flavobacteriales	Cryomorphaceae
c54c0e51b015bda8d964d841302b5aaf	Bacteria	Bacteroidetes	Flavobacteriia	Flavobacteriales	Flavobacteriaceae	NS5 marine group	uncultured bacterium
0f02ff7fd08fac168e40a173832ebc36	Bacteria	Proteobacteria	Deltaproteobacteria	Bdellovibrionales	Bdellovibrionaceae	OM27 clade	uncultured delta proteobacterium
95d77d3b77416b13014d0596ce4333c1	Bacteria	Proteobacteria	Gammaproteobacteria	Thiotrichales	Thiotrichales Incertae Sedis	Caedibacter	uncultured bacterium
2a1917bfb62f1bd7bac36560688205a0	Bacteria	Bacteroidetes	Sphingobacteriia	Sphingobacteriales	Chitinophagaceae	uncultured	uncultured Bacteroidetes bacterium
33f39a6359ba31c2129e2144893daaab	Bacteria	Bacteroidetes	Flavobacteriia	Flavobacteriales
772fecae0e29f7743075d16ccc125657	Bacteria	Bacteroidetes	Flavobacteriia	Flavobacteriales	Flavobacteriaceae	Winogradskyella	uncultured bacterium
8f9f1aae9646df33f47a6cf3fe8e9739	Bacteria	Bacteroidetes	Cytophagia	Order II	Rhodothermaceae	uncultured	uncultured Bacteroidetes bacterium
9fec8e3e848d2a7b49b703ece8853401	Bacteria	Proteobacteria	Epsilonproteobacteria	Campylobacterales	Helicobacteraceae	Sulfurovum
fe7524c7b9627fef8d04e09255ab2434	Bacteria	Proteobacteria	Gammaproteobacteria	Oceanospirillales	Oleiphilaceae	Oleiphilus
57a6ccc00a4f9f0217c189d8dec8bce0	Bacteria	Chloroflexi	Caldilineae	Caldilineales	Caldilineaceae	uncultured
72fa7987fcc34b4b59242012dd0a1df9	Bacteria	Proteobacteria	Epsilonproteobacteria	Campylobacterales	Helicobacteraceae	Sulfurimonas
8bd97954cb820d0aaead081c0f825e36	Bacteria	Proteobacteria	Betaproteobacteria
cf8aee773c26f256dcd6d66e3db30a12	Archaea	Thaumarchaeota	Marine Group I	Unknown Order	Unknown Family	Candidatus Nitrosopumilus
c91831c49b8e94901a7a50d0df9e482e	Bacteria	Verrucomicrobia	Opitutae	Puniceicoccales	Puniceicoccaceae	uncultured	uncultured organism
33f9363f9b960cd9194046ea796dda8f	Bacteria	Deferribacteres	Deferribacteres	Deferribacterales	SAR406 clade(Marine group A)	marine metagenome
556c737693b8da58d2dddbdf145583a7	Bacteria	Proteobacteria	Alphaproteobacteria	Rickettsiales	Rickettsiaceae	Rickettsia
445177db4782c4620b824bff0d5e5423	Bacteria	Bacteroidetes	Flavobacteriia	Flavobacteriales	Flavobacteriaceae
f663b8bf5da90a50a54540d696f1a8a4	Bacteria	Proteobacteria	Epsilonproteobacteria	Campylobacterales	Helicobacteraceae	Sulfurimonas
d9b7d98120e626b2f0f10e3febe8682c	Bacteria	Proteobacteria	Alphaproteobacteria	Rickettsiales	SAR116 clade	uncultured bacterium
e5842c9c88530748259c56a35e84fb9a	Bacteria	Proteobacteria	Gammaproteobacteria	Vibrionales	Vibrionaceae
1862d1cc91d1a583500254961cb986d3	Bacteria	Proteobacteria	Gammaproteobacteria	Order Incertae Sedis	Family Incertae Sedis	Marinicella	uncultured organism
c6947a85de5c38650c08466e8a87866a	Bacteria	Proteobacteria	Alphaproteobacteria	Sphingomonadales	Sphingomonadales Incertae Sedis	Kiloniella	uncultured bacterium
fb475dce09b74a447ac4adc560e755f8	Bacteria
efebe77af15ff501e89f88e27ae9ca8b	Bacteria	Bacteroidetes	Flavobacteriia	Flavobacteriales	NS9 marine group
dc727c6237e05d85f10451c17b6ab340	Bacteria	Proteobacteria	Deltaproteobacteria	Desulfobacterales	Desulfobulbaceae	uncultured	uncultured delta proteobacterium
4398c921531f079eaa529fbcd25c33cf	Bacteria	Proteobacteria	Deltaproteobacteria	Desulfuromonadales	GR-WP33-58
febc406282fcd13d24d433d08860cb29	Bacteria	Proteobacteria	Alphaproteobacteria	Kordiimonadales	Kordiimonadaceae	Kordiimonas	uncultured bacterium
0dfb044d18fd1ebb20f71e6e1d4b83ec	Bacteria	Bacteroidetes	Cytophagia	Cytophagales	Flammeovirgaceae	Reichenbachiella	uncultured bacterium
e6f36661db6fbcff3ccc39aa0a823810	Bacteria	Bacteroidetes	Flavobacteriia	Flavobacteriales	Cryomorphaceae	Owenweeksia	uncultured Flavobacterium sp.
3a74715ac628d27484859cefc4ee0877	Bacteria	Bacteroidetes	Cytophagia	Cytophagales	Flammeovirgaceae	Reichenbachiella	uncultured bacterium
44d2e36b9b0774cd7899f59d99b545fd	Bacteria
306efcbd2c4bfb204f5edc78a3770079	Bacteria	Bacteroidetes	Flavobacteriia	Flavobacteriales	NS9 marine group
e72f887eaf900d1bb3dd760d73edac41	Bacteria	Bacteroidetes	Flavobacteriia	Flavobacteriales	Flavobacteriaceae
1ffdb862f95b962256ef23dee5bfe455	Bacteria	Firmicutes	Clostridia	Clostridiales	Ruminococcaceae	Incertae Sedis
e5f2bff6bef2e90a24056e494d911bfd	Bacteria	Proteobacteria	Epsilonproteobacteria	Campylobacterales	Campylobacteraceae	Arcobacter	uncultured bacterium
79b035a12b3b42cfb548824c6bdc72a4	Bacteria	Bacteroidetes	Flavobacteriia	Flavobacteriales	NS9 marine group	uncultured bacterium
93b2cb19723f915a805a4cd20f594f07	Bacteria	Bacteroidetes	Flavobacteriia	Flavobacteriales	Flavobacteriaceae
45588337513220c8462e1158516f9d20	Bacteria	Bacteroidetes	Flavobacteriia	Flavobacteriales	NS9 marine group
8784c48f2e25f83675c16a766ef0a315	Bacteria	Proteobacteria	Alphaproteobacteria	Rickettsiales	SHWN-night2	uncultured alpha proteobacterium
16bf085946684ed5fe695352fdaa04bd	Bacteria	Proteobacteria	Gammaproteobacteria	Alteromonadales	Pseudoalteromonadaceae	Pseudoalteromonas
2530eeae0452f1fce8e7dbfbe2c5fd9f	Bacteria	Deferribacteres	Deferribacteres	Deferribacterales	SAR406 clade(Marine group A)	marine metagenome
1ef2eca98f33e2c8a632157be5059bfb	Bacteria	Bacteroidetes	Flavobacteriia	Flavobacteriales	Flavobacteriaceae	NS5 marine group	uncultured Flavobacteriaceae bacterium
7fc0ccbd86b09190f44369a934b3456c	Bacteria	Cyanobacteria	Cyanobacteria	SubsectionI	FamilyI	Synechococcus
67f59db4c23e06a8484ab88a3e520323	Bacteria	Proteobacteria	Alphaproteobacteria	Rhodospirillales	Rhodospirillaceae	Defluviicoccus
c2b8726879eb36f1f48b0defed86f881	Bacteria	Bacteroidetes	Flavobacteriia	Flavobacteriales	Flavobacteriaceae	Robiginitalea	uncultured bacterium
c05284e5bcffac6356a955de126647ca	Bacteria	Lentisphaerae	Oligosphaeria	uncultured Lentisphaerae bacterium
c6f77d4f9f6415c42407ec2e76cd3bf1	Bacteria	Verrucomicrobia	Opitutae	Puniceicoccales	Puniceicoccaceae	uncultured	uncultured bacterium
70e524a6db4d55981dd8741d0260e0de	Bacteria	Proteobacteria	Alphaproteobacteria	Rhodobacterales	Rhodobacteraceae
6e64fa9bd9d360dd02f003dc3dae54fd	Bacteria	Planctomycetes	Planctomycetacia	Planctomycetales	Planctomycetaceae	Blastopirellula	uncultured bacterium
ec788d52e2223fe1dc05cd215d8d501f	Bacteria	Proteobacteria	Gammaproteobacteria	Xanthomonadales	JTB255 marine benthic group
f538bc4cf1d9c92e9a7a74045e75a629	Bacteria	Planctomycetes	OM190	uncultured planctomycete
4904bae765d82e0974ebb25e2eaa75ce	Bacteria	Proteobacteria	Deltaproteobacteria	Bdellovibrionales	Bacteriovoracaceae
5610f9fd4d05131f3274383ca5be7ed2	Bacteria	Proteobacteria	Gammaproteobacteria	Oceanospirillales	Oceanospirillaceae	Pseudospirillum
6d9bcdb24b32c7202cf6f079065280f3	Bacteria	Proteobacteria	Alphaproteobacteria	OCS116 clade	uncultured bacterium
d2a27974b76251f51920e40d7c7d08bd	Bacteria	Cyanobacteria	Melainabacteria	Caenarcaniphilales	uncultured bacterium
ae886675883425b4c649a7478e1b7577	Bacteria	Proteobacteria	Deltaproteobacteria	Bdellovibrionales	Bacteriovoracaceae	Peredibacter	uncultured bacterium
8e346efc87aa8e82c30ef601d8bafe2f	Bacteria	Proteobacteria	Deltaproteobacteria	Desulfuromonadales	GR-WP33-58	uncultured delta proteobacterium
9830760f481f18327c2c4511d61398de	Bacteria	Proteobacteria	Alphaproteobacteria	Rhodobacterales	Rhodobacteraceae
83e78d031e80b5cda09f5b042d68386a	Bacteria	Bacteroidetes	Flavobacteriia	Flavobacteriales	Cryomorphaceae
2ffc32fd670446fa2a95b2209aaf1a9a	Bacteria	Proteobacteria	Gammaproteobacteria	Oceanospirillales	OM182 clade	uncultured organism
9b3efc3ccc5e43757082e0a614113822	Bacteria	Planctomycetes	Phycisphaerae	Phycisphaerales	Phycisphaeraceae	Urania-1B-19 marine sediment group	unidentified marine bacterioplankton
2263acc68242b53cdc14a7ca1fccd018	Bacteria	Proteobacteria	Gammaproteobacteria	Vibrionales	Vibrionaceae	Vibrio
7b1896181def8abf5ada238339bed916	Bacteria	Bacteroidetes	Cytophagia	Order II	Rhodothermaceae	uncultured
a9730bc6220b355e05d53381a2031201	Bacteria	Cyanobacteria	Cyanobacteria	SubsectionIV	FamilyII	Calothrix	uncultured bacterium
d0eb4edf415a89daf0283f7299e9d021	Bacteria	Bacteroidetes	Flavobacteriia	Flavobacteriales	Flavobacteriaceae	Zeaxanthinibacter	uncultured bacterium
a5598e36f757514a0352f7ba55d85199	Bacteria	Proteobacteria	Alphaproteobacteria	Rhizobiales	Phyllobacteriaceae	Pseudahrensia
1040ffc55a036894e9ec2cbe47802e07	Bacteria	Proteobacteria	Gammaproteobacteria	Oceanospirillales	SAR86 clade
472d2ae9ad0bfd7e3bbb41430906ab69	Bacteria	Proteobacteria	Gammaproteobacteria	Alteromonadales	Alteromonadaceae
93ba584986c5f893d5fe1745af1004f2	Bacteria	Bacteroidetes	Flavobacteriia	Flavobacteriales
e5000feada22d584f2b1ef717d1f1b1d	Bacteria
8eb08e47daf33f9909d2c46bc302e696	Bacteria	Proteobacteria	Alphaproteobacteria	Rhodobacterales	Rhodobacteraceae
07ec67e8156ccd15fec7080a811e141c	Bacteria	Proteobacteria	Gammaproteobacteria	Xanthomonadales	JTB255 marine benthic group
18e2973b0b16cb1ffe4cd20876c934e3	Bacteria	Proteobacteria	Alphaproteobacteria	Rhodobacterales	Rhodobacteraceae	Octadecabacter	uncultured marine bacterium
5e6553c89aa09df554730e0e0dcddff2	Bacteria	Planctomycetes	Planctomycetacia	Planctomycetales	Planctomycetaceae	Blastopirellula
af78cb9e63350665491e611e2411c171	Archaea	Euryarchaeota	Halobacteria	Halobacteriales	Deep Sea Hydrothermal Vent Gp 6(DHVEG-6)	uncultured euryarchaeote
7ee28832926f91d9e0907abadb80b880	Bacteria	Proteobacteria	Gammaproteobacteria	HOC36
bee943ffc36fb8f660d16f7bc6d8b9c0	Bacteria	Proteobacteria	Gammaproteobacteria	Alteromonadales	Alteromonadaceae	Glaciecola	uncultured bacterium
76240e87266985cc9060e1de38170bc2	Bacteria	Proteobacteria	Gammaproteobacteria
fdd8fc10037d9e0e2f8cd7d43a210669	Bacteria	Bacteroidetes	Cytophagia	Cytophagales	Cytophagaceae	Runella	uncultured bacterium
a4f9aa3109031f2e031f8db7f91cd28a	Bacteria	Proteobacteria	Gammaproteobacteria	Alteromonadales	Shewanellaceae	Shewanella
296b4d45fa6c22436705dcfdfdfb3c5f	Bacteria	Proteobacteria	Epsilonproteobacteria	Campylobacterales	Campylobacteraceae	Arcobacter
74671b83e5c4600d0b1955b4c17ffb5c	Bacteria	Bacteroidetes	Flavobacteriia	Flavobacteriales
d05ccd98167a72d13ec85a2e81c2da06	Bacteria	Verrucomicrobia	Verrucomicrobiae	Verrucomicrobiales	DEV007	uncultured bacterium
5100343c1e946364d20e495e3e209bc6	Bacteria	Proteobacteria	Gammaproteobacteria	Oceanospirillales	Oceanospirillaceae
41413ba2640285f6a22dc68a92d8312b	Bacteria	Planctomycetes	OM190	uncultured bacterium
8e0853ccd09522a3a8c2742a374fab62	Bacteria
eb32459bd42821aedd3001b8cfbb676e	Bacteria	Proteobacteria	Epsilonproteobacteria	Campylobacterales	Helicobacteraceae	Sulfurimonas
936af85fbfb2637a2f3c007774bed333	Bacteria	Cyanobacteria
5511d7e46c7812c750470a3d28c32f4d	Bacteria	Proteobacteria	Proteobacteria Incertae Sedis	Unknown Order	Unknown Family	Candidatus Thiobios	uncultured bacterium
9836a665d89d50221c106ab49a9fd5f1	Bacteria	Proteobacteria	Deltaproteobacteria	Bdellovibrionales	Bacteriovoracaceae	Peredibacter
7ba3d25c1364399fcd59076c4d90732b	Bacteria	Actinobacteria	Actinobacteria	Micrococcales	Microbacteriaceae
ef2f50e69ca0d959f6c4a6a726ba51e1	Bacteria	Planctomycetes	OM190
5becdcb4c3c8cfac25525c0b7e4ff555	Bacteria	Proteobacteria	Epsilonproteobacteria	Campylobacterales	Campylobacteraceae	Arcobacter	uncultured epsilon proteobacterium
d1c3545aa01f01c148c8b11eef74200b	Bacteria	Bacteroidetes	Sphingobacteriia	Sphingobacteriales	Saprospiraceae	uncultured	uncultured bacterium
7c762c36ae20866e1998a696f50f9716	Bacteria	Planctomycetes	OM190	uncultured planctomycete
76d2032108822bcfaa90a4873f7a51aa	Bacteria	Proteobacteria	Gammaproteobacteria
ff56c3d727e826252b15d12658a7dd0a	Bacteria	Proteobacteria	Alphaproteobacteria	Rhodobacterales	Rhodobacteraceae	Thalassobius	uncultured bacterium
858cfa0f83da84313e6a53bb5e022fef	Bacteria	Bacteroidetes	Sphingobacteriia	Sphingobacteriales	NS11-12 marine group	uncultured bacterium
eb7ad7504f3a8f3dfa3361a19fc14984	Bacteria	Proteobacteria	Gammaproteobacteria	KI89A clade	uncultured bacterium
bc5ebeb0c45887963ca19fe857b5e2a3	Bacteria	Proteobacteria	Deltaproteobacteria	Desulfuromonadales	GR-WP33-58	uncultured bacterium
22ddc833d48a4103f6a1bfcae8afd89e	Bacteria	Proteobacteria	Gammaproteobacteria	Vibrionales	Vibrionaceae	Vibrio
8b18e10c49ed7c721356b30086ede636	Bacteria	Proteobacteria	Gammaproteobacteria
77c4c725ffd7d3e21b5cbb71f7174926	Bacteria	Proteobacteria	Alphaproteobacteria	Rhodobacterales	Rhodobacteraceae	uncultured
3f82d7bd69275938b630a024166569d4	Bacteria
c0d622c52344548978be1df252f7b32e	Bacteria	Proteobacteria	Alphaproteobacteria	Rhizobiales	Phyllobacteriaceae
0ec3fc0cd8e8236d5ebd64bced2f2ce9	Bacteria
7071c157764d04aee6f6ebb5ea6ee24e	Bacteria	Bacteroidetes	Cytophagia	Cytophagales	Flammeovirgaceae	Marinoscillum	uncultured bacterium
d741fb51a419da5d9265233ce7d677d4	Bacteria	Proteobacteria	Gammaproteobacteria	Alteromonadales	Alteromonadaceae	OM60(NOR5) clade
5551fbee571002e97f1dd9ef96e7f79e	Bacteria	Bacteroidetes	Flavobacteriia	Flavobacteriales
7ef622cd17b0b2a9b259e3f80521a671	Bacteria	Proteobacteria	Gammaproteobacteria	Vibrionales	Vibrionaceae	Vibrio
db922d1cf14296ecbc83c34b85e0e5f7	Bacteria	Proteobacteria	Deltaproteobacteria	Desulfobacterales	Desulfobacteraceae	Desulfosarcina
d6165e0582a03dd12b473c294cdd3bcd	Bacteria	Proteobacteria	Gammaproteobacteria	Oceanospirillales	SAR86 clade	uncultured bacterium
6489802094932dd5e9628f7dbe4ffd76	Bacteria
9cf9ae97e2cdc5aab01ad1356efafa70	Bacteria	Proteobacteria	Alphaproteobacteria	Rhodobacterales	Rhodobacteraceae
08aeba14cd002cb375f0f880423b0373	Bacteria	Proteobacteria	Gammaproteobacteria	Order Incertae Sedis	Family Incertae Sedis	Marinicella	uncultured marine bacterium
f1bb935fa8a308892ff011e7813dfc5c	Bacteria
d8783ee923cd85c2a36a867210303e03	Bacteria	Proteobacteria	Gammaproteobacteria	Thiotrichales	Thiotrichaceae	Thiothrix
60f980bd7c0b414ac99a2c7faeae33bd	Archaea	Euryarchaeota	Thermoplasmata	Thermoplasmatales	Marine Group II
c68f4b5ae969ad9377a365add435c4ba	Bacteria	Proteobacteria	Alphaproteobacteria	Rhodobacterales	Rhodobacteraceae
eda6f9881bff8aea35a15d26cc534efd	Bacteria	Bacteroidetes	Flavobacteriia	Flavobacteriales	Flavobacteriaceae	Tenacibaculum	uncultured bacterium
b7bf4f053f098f3b5df7e8c6b6c3c85b	Bacteria	Bacteroidetes	Flavobacteriia	Flavobacteriales	Flavobacteriaceae	NS5 marine group	uncultured Flavobacteriaceae bacterium
f69b975d43cff70e8452dd8b5abf5ca7	Bacteria	Bacteroidetes	Cytophagia	Cytophagales	Flammeovirgaceae	uncultured	uncultured bacterium
a25493f4375d6e219204c40fbeb88bae	Bacteria	Proteobacteria	Alphaproteobacteria	Rhodobacterales	Rhodobacteraceae
9002f85b03d9dcb79bdf61619b029a94	Bacteria	Actinobacteria	Acidimicrobiia	Acidimicrobiales	Acidimicrobiaceae
06a50f0a10f5d88b3a164a6d919fb2ce	Bacteria	Bacteroidetes	Flavobacteriia	Flavobacteriales	Flavobacteriaceae	Robiginitalea	uncultured bacterium
2ac78eab891547d4311ab6a5900f6ddc	Bacteria	Proteobacteria	Deltaproteobacteria	Desulfuromonadales	GR-WP33-58
5135b86f37750dfe66b4941dbb4cf998	Bacteria	Proteobacteria	Deltaproteobacteria	Bdellovibrionales	Bacteriovoracaceae
10ca86dccfe1472117a0599a1f4f1635	Bacteria	Proteobacteria	Gammaproteobacteria	Oceanospirillales	Litoricolaceae	Litoricola	uncultured bacterium
8645ac02dc586fcd4a083b94279834f7	Bacteria
8d5f3c5b570aa30bf6cf336ce6ed13de	Bacteria	Bacteroidetes	Flavobacteriia	Flavobacteriales	Cryomorphaceae	Owenweeksia
831a4127fc479feef1e7155481350de4	Bacteria	Bacteroidetes	Cytophagia	Cytophagales	Flammeovirgaceae	Reichenbachiella
75fea6e8418ba726fc514d9223957459	Bacteria	Bacteroidetes	Sphingobacteriia	Sphingobacteriales	Saprospiraceae	Portibacter	uncultured Bacteroidetes bacterium
1438af8d3f304470c4aee3d93544521e	Bacteria	Proteobacteria	Deltaproteobacteria	Bdellovibrionales	Bdellovibrionaceae	OM27 clade	uncultured bacterium
2e11738f8baef08f6d2f70a60a84d49c	Bacteria	Bacteroidetes	Cytophagia	Order III	uncultured	uncultured bacterium
66c5253c6d7fc739b2d882966842f805	Bacteria	Bacteroidetes	Flavobacteriia	Flavobacteriales	Flavobacteriaceae
22f26cc2c7277df74d59aa1f5adb05e4	Bacteria	Bacteroidetes	Flavobacteriia	Flavobacteriales	Flavobacteriaceae	NS4 marine group	uncultured bacterium
9c9a6f93f833a20af774c84d67bd1e6d	Bacteria	Actinobacteria	Acidimicrobiia	Acidimicrobiales	OM1 clade	uncultured Gram-positive bacterium
52a12573364e04515cd1b6ca26747d8a	Bacteria	Planctomycetes	Planctomycetacia	Planctomycetales	Planctomycetaceae	Planctomyces
28c5cb15d9144ea7a81c49066fa823d2	Bacteria	Proteobacteria	Deltaproteobacteria	Desulfuromonadales	GR-WP33-58	uncultured delta proteobacterium
cd0ef412173626fda1a8760305c020e7	Bacteria	Bacteroidetes	Flavobacteriia	Flavobacteriales	Flavobacteriaceae	Winogradskyella	uncultured bacterium
5cf895de5a29fad24106c26c66ad397b	Archaea	Euryarchaeota	Thermoplasmata	Thermoplasmatales	Marine Group II
3c50a306418027c31acfcaae55042a97	Bacteria
566cad8c05c2852195e900301d143443	Bacteria	Proteobacteria	Alphaproteobacteria	Rhodobacterales	Rhodobacteraceae
0fdfd3590d32b1518acd771d90fee5c4	Bacteria	Bacteroidetes	Flavobacteriia	Flavobacteriales	Flavobacteriaceae	Zeaxanthinibacter	uncultured bacterium
33ec2672acc39980a0e805c26d08cb79	Bacteria	Tenericutes	Mollicutes	Acholeplasmatales	Acholeplasmataceae	Acholeplasma	uncultured Mollicutes bacterium
d6daa9a6e5792039508ec8abae22a8ea	Bacteria	Proteobacteria	Deltaproteobacteria	Bdellovibrionales	Bdellovibrionaceae	OM27 clade	uncultured delta proteobacterium
a7be20c620c614e16eecd663f28dfab5	Bacteria	Proteobacteria	Deltaproteobacteria	Bdellovibrionales	Bacteriovoracaceae	Bacteriovorax	uncultured bacterium
cefbbaabbe2748b243095e71e7b86265	Bacteria
f2830995d6cbc95a7373bae372ab8659	Bacteria	Proteobacteria	Deltaproteobacteria	Bdellovibrionales	Bacteriovoracaceae
fd019aa4fa197d3296e75466080fae39	Bacteria	Proteobacteria	Gammaproteobacteria	BD7-8 marine group	uncultured bacterium
81fc9a2f5c4e483daf06a956b746e5bb	Bacteria
59b2fcb3a698ac31bfbbb6b3c4b4f356	Bacteria	Proteobacteria	Alphaproteobacteria	Rhodobacterales	Rhodobacteraceae	Ruegeria
5a5bd73a1973f5a5d67cd0c2d0c30994	Bacteria	Proteobacteria	AEGEAN-245	uncultured bacterium
8ac7d00932bbe59e782df084e0a4de99	Bacteria	Verrucomicrobia	Opitutae	Puniceicoccales	Puniceicoccaceae	Lentimonas	uncultured bacterium
ecc9941cbadd9f5f6c9a39dbe0d5d6af	Bacteria	Bacteroidetes	Flavobacteriia	Flavobacteriales	Flavobacteriaceae	Muricauda	uncultured bacterium
f3ec851b710817bb01a81540c8a17a53	Bacteria
790e976dfd7c72094f38aee1b759d212	Bacteria	Verrucomicrobia	Verrucomicrobiae	Verrucomicrobiales	Verrucomicrobiaceae	Roseibacillus	uncultured bacterium
05d8c38aa39c708e6f1f4f29ee655f38	Bacteria
be1ba9427aec3988d52363255a98f262	Bacteria	Proteobacteria	Gammaproteobacteria	Order Incertae Sedis	Family Incertae Sedis	Marinicella	uncultured marine bacterium
1c1f1393407cd1c718845b8160c031a5	Bacteria	Bacteroidetes	Flavobacteriia	Flavobacteriales	Flavobacteriaceae
5b1c0cf7507fd292f89d8fad63ac0235	Bacteria	Proteobacteria	Epsilonproteobacteria	Campylobacterales	Helicobacteraceae	Sulfurimonas	uncultured Sulfurimonas sp.
29dea63c00176d2284e408688fab2a31	Bacteria	Proteobacteria	Gammaproteobacteria
6005a02ca4a778165ea119d7f2dab69f	Bacteria
66af18a6c1cd02c8fa96dba4c7119bb6	Bacteria	Bacteroidetes	Cytophagia	Cytophagales	MWH-CFBk5	uncultured bacterium
9ad2fdaa5cdc94b7296f38ed7a13250b	Bacteria	Proteobacteria	Gammaproteobacteria	Alteromonadales	Alteromonadaceae	OM60(NOR5) clade
689c4eb56a6c953ebb3cf2d3c93091d8	Bacteria	Bacteroidetes
443164c71768102f8656148048472610	Bacteria	Verrucomicrobia	Opitutae	MB11C04 marine group	uncultured bacterium
8d2788d498bc6528a24e66350380fb78	Bacteria	Proteobacteria	Alphaproteobacteria	Caulobacterales	Hyphomonadaceae	uncultured	uncultured bacterium
e74a94435f9a11aa7948c36985932c84	Bacteria	Verrucomicrobia	Opitutae	MB11C04 marine group	uncultured bacterium
9ed9a6e86361c9fa13c0d10c7772e818	Bacteria	Proteobacteria	Gammaproteobacteria
f3f9d88447afe744aa34806664d5dce9	Bacteria	Proteobacteria	Gammaproteobacteria	Order Incertae Sedis	Family Incertae Sedis	Marinicella
c5db984df8a1de47086015ac1a1e1cb6	Bacteria	Bacteroidetes
36f7c4e642ba4bcfe5c4bd0d9173adda	Bacteria	Proteobacteria	Alphaproteobacteria	Rhodospirillales	Rhodospirillaceae	Defluviicoccus
e7738cf0bb82ac429231fb6fded5e47a	Bacteria	Proteobacteria	Alphaproteobacteria	SAR11 clade	Surface 1
4201c8cbbc7f7323b35e8fbdb4f7704a	Bacteria	Proteobacteria	Alphaproteobacteria	Rhizobiales	Phyllobacteriaceae	Cohaesibacter
eb86a9b863eadc5650d6be86a98c0032	Bacteria	Proteobacteria	Alphaproteobacteria	Sphingomonadales	Erythrobacteraceae
05564cb3c38d5c04657f9e430c92c9c0	Bacteria	Verrucomicrobia	Opitutae	MB11C04 marine group
6529775154ac4562d9f14e88e13788d2	Bacteria
44cc0863838fe6b620b8a06323f46c94	Bacteria	Proteobacteria	Alphaproteobacteria	Sphingomonadales	Erythrobacteraceae	Erythrobacter	uncultured bacterium
0166ac0863837f3e87a4a75afd9e7ddf	Bacteria	Cyanobacteria
6de63ec68dbefea9c4bd6d6f25addb17	Bacteria	Planctomycetes	Planctomycetacia	Planctomycetales	Planctomycetaceae	Rhodopirellula	uncultured planctomycete
003cc5237c5106aafaaa23017008702c	Bacteria	Bacteroidetes	Flavobacteriia	Flavobacteriales	Cryomorphaceae	Owenweeksia	uncultured bacterium
7cfed4230313e2ab5c148fe5aa34fe1c	Bacteria	Verrucomicrobia	Opitutae	MB11C04 marine group	uncultured bacterium
d662836b8a9340a56d325755d0feb0b4	Bacteria	Planctomycetes	Planctomycetacia	Planctomycetales	Planctomycetaceae
8801b8ab477e407ae25ae728a0b7b5d9	Bacteria	Bacteroidetes	Cytophagia	Cytophagales
86f65759c04c4454adfe2c080d793c89	Archaea	Thaumarchaeota	Marine Group I	Unknown Order	Unknown Family	Candidatus Nitrosopumilus	uncultured archaeon
82ee9064dc047de4f3dba7f2f0a72fcd	Bacteria	Proteobacteria	Gammaproteobacteria	Oceanospirillales	Oceanospirillaceae	Neptuniibacter	uncultured bacterium
e20261f572d7d1b83818e4ae44423acd	Bacteria	Bacteroidetes
ccd3a8ca5ba3f2b5b796fd678ed6e3ed	Bacteria	Proteobacteria	Alphaproteobacteria	Rhodobacterales	Rhodobacteraceae
fbe36876d118508cf7e4fb67cbc032e2	Bacteria	Bacteroidetes	Cytophagia	Order III	Unknown Family	Balneola	uncultured bacterium
c5d6b14e6d887844fc9df15b83ebf099	Bacteria	Verrucomicrobia	Opitutae	MB11C04 marine group	uncultured marine bacterium
9cf48e935b82a7b692acd8ac8717a996	Bacteria	Proteobacteria	Gammaproteobacteria
0e975188008ac0189782beb490a5c48e	Bacteria
af1db38ebc1d3c3ab5cc986721398c6a	Bacteria	Bacteroidetes	Cytophagia	Cytophagales	Flammeovirgaceae	Reichenbachiella	uncultured bacterium
204ef5ccc8ea2b46f96103c2c3ce7868	Bacteria	Proteobacteria	Gammaproteobacteria	Alteromonadales
d1c251c192e93224962dbb899cf3ea24	Bacteria	Bacteroidetes	Flavobacteriia	Flavobacteriales	NS7 marine group	uncultured bacterium
80dd72ca270b553f5c7419db052fde78	Bacteria	Actinobacteria	Acidimicrobiia	Acidimicrobiales	Sva0996 marine group	uncultured bacterium
f5b2dd40a7d7dce08f2266397a94e171	Bacteria	Proteobacteria	Gammaproteobacteria	Oceanospirillales	Alcanivoracaceae	Kangiella
cfd3c6b9cc34258f81c07d2c8feb3eb9	Bacteria	Bacteroidetes	Flavobacteriia	Flavobacteriales	Flavobacteriaceae
2572e8056b65129f70695e5c4dbf8a2d	Bacteria	Deferribacteres	Deferribacteres	Deferribacterales	SAR406 clade(Marine group A)	marine metagenome
9f694ae065fcfcf17a298da89935a0c7	Bacteria	Proteobacteria	Betaproteobacteria	Burkholderiales	Alcaligenaceae	MWH-UniP1 aquatic group	uncultured bacterium
801463e61abcfcc2938e84e16c3929d6	Bacteria	Proteobacteria	Alphaproteobacteria	SAR11 clade	unidentified marine bacterioplankton
c6eecb8a5f4550768cfd4d4a4723c636	Bacteria	Chloroflexi	Anaerolineae	Anaerolineales	Anaerolineaceae	uncultured
1a989a37482432cfa0c07bc6a35c4609	Bacteria	Proteobacteria	Alphaproteobacteria	Rhodobacterales	Rhodobacteraceae
4e7254e7faee92f9868759c556ed73ae	Bacteria	Actinobacteria	Acidimicrobiia	Acidimicrobiales	OM1 clade	Candidatus Actinomarina	uncultured bacterium
14525301bb4271314d10e75fe308a602	Bacteria	Proteobacteria	Alphaproteobacteria	Rickettsiales	SAR116 clade
4dd120c42c5cdd3a2243b85667c65f86	Bacteria
ec9285bc70461b117d8a562a8ecc6779	Bacteria
be904222e0d097e84f1dfe289b9f0c18	Bacteria	Planctomycetes
1fa3779678b818cf2e064be7c77169c7	Bacteria	Proteobacteria	Deltaproteobacteria	Desulfobacterales	Desulfobacteraceae	Desulfosarcina	uncultured bacterium
1c6a8d82c50697fc1082823692d45758	Bacteria	Proteobacteria	Deltaproteobacteria	Bdellovibrionales	Bdellovibrionaceae	OM27 clade	uncultured bacterium
1c044f905d54cfc6c740710cb2599c0f	Bacteria	Cyanobacteria
5a51468c56dc64f4c68518fc06712dc9	Bacteria	Proteobacteria
9affe599a6d2f44999e629303626ac7e	Bacteria	Cyanobacteria
635908777c4db37b28b993aa5510e8a8	Bacteria	Proteobacteria	Gammaproteobacteria	Thiotrichales	Thiotrichaceae
57031d5cbd768559759a21b6d86cd477	Bacteria	Bacteroidetes	Flavobacteriia	Flavobacteriales	Flavobacteriaceae	Flavobacterium	uncultured Bacteroidetes bacterium
99847a0aad4c578374c41bae937991b6	Bacteria	Bacteroidetes	Flavobacteriia	Flavobacteriales	Flavobacteriaceae	NS5 marine group	uncultured Flavobacterium sp.
08f4ea64f3bad4854b19c7857c4c6d84	Bacteria	Proteobacteria	Gammaproteobacteria
04164008c95c5d22a46654efeec675b9	Archaea	Thaumarchaeota	Marine Group I
bf7c8b35b60d08c0bf62fc2894b0a543	Bacteria	Verrucomicrobia	Opitutae	MB11C04 marine group	uncultured bacterium
b6be254413a7e7d160e6ca9101729245	Bacteria	Actinobacteria	Actinobacteria	Micrococcales	Microbacteriaceae	Candidatus Aquiluna	uncultured bacterium
4e379d3c1623d6f310042bcd1d7a2529	Bacteria	Proteobacteria	Deltaproteobacteria	Myxococcales	Sandaracinaceae
583f1b6f90c6d060dcc2ca5259c54d68	Bacteria
55814a4ea8a202d9b328c7b68584bf90	Bacteria	Proteobacteria	Alphaproteobacteria	Rickettsiales	S25-593	uncultured bacterium
45ce9f54d9768cda11c5fd16fb7376f9	Bacteria	Proteobacteria	Gammaproteobacteria	Alteromonadales	Alteromonadaceae	OM60(NOR5) clade
24649203e099e9ac8efec7bcfc3e23aa	Bacteria
0931d916eadcfbcb4ce814f9e9c9347c	Bacteria	Planctomycetes	Planctomycetacia	Planctomycetales	Planctomycetaceae	Pirellula
9bae969e46731bfb02da1c09e93c5605	Bacteria	Verrucomicrobia	Verrucomicrobiae	Verrucomicrobiales	Verrucomicrobiaceae
eb968a85f5fd0297c23d4b28437592ba	Bacteria	Proteobacteria	Alphaproteobacteria	Rhodobacterales	Rhodobacteraceae
1b63708463863478d3ddc546b999a524	Bacteria	Proteobacteria	Epsilonproteobacteria	Campylobacterales	Campylobacteraceae	Arcobacter	uncultured Arcobacter sp.
5632cbc1d803419ae46d4bca1c6bf490	Bacteria
b444ef1b420bbc91849efaf6ba933643	Bacteria
d56d487973829be6bedf092e2fc3b90e	Bacteria	Proteobacteria	Alphaproteobacteria	SAR11 clade	Surface 2
e20c9ca570aa61642b9a6436a43ff8d5	Bacteria	Bacteroidetes	Cytophagia	Cytophagales	Flammeovirgaceae	Reichenbachiella	uncultured bacterium
d552a67e6a6862fee0d5e7c2bc181870	Bacteria	Proteobacteria	Gammaproteobacteria	Vibrionales	Vibrionaceae	Photobacterium	uncultured bacterium
b763b14a7a59286bc9753358af0ef9e7	Bacteria	Proteobacteria	Gammaproteobacteria	Oceanospirillales	Oleiphilaceae	Oleiphilus
037ce23d118379e3059fafa960021593	Bacteria	Bacteroidetes	Cytophagia	Order II	Rhodothermaceae	uncultured	uncultured Bacteroidetes bacterium
05734150853338b5e489721794a7c826	Bacteria	Cyanobacteria	ML635J-21	uncultured bacterium
ffb26b6256616df8667a128609bc9035	Bacteria	Firmicutes	Clostridia	Clostridiales	Ruminococcaceae	uncultured	uncultured delta proteobacterium
8fe69c583807bcef08f9788fd3e5ad97	Bacteria	Proteobacteria	Alphaproteobacteria	Rhodospirillales	Rhodospirillaceae	Defluviicoccus	unidentified marine bacterioplankton
2e7dc21a0f95dd7b7d840d410c07483d	Bacteria	Proteobacteria	Epsilonproteobacteria	Campylobacterales	Campylobacteraceae	Arcobacter
6a8d7b9353cb4112e42bc9975048431c	Bacteria	Proteobacteria	Deltaproteobacteria	Bdellovibrionales	Bdellovibrionaceae	OM27 clade
fb12653e9e9d5dfeabfcd1bd3b77edda	Bacteria
65e8862e83c6e7b1faf053b29c3f1681	Bacteria	Proteobacteria	Alphaproteobacteria	Rhodobacterales	Rhodobacteraceae
abef7f88dc008ecad12a91c43ba9583c	Bacteria	Cyanobacteria	Cyanobacteria	SubsectionI	FamilyI	Synechococcus
d239e96a3f1ad1ebf4ed9aee42656456	Bacteria	Proteobacteria	Betaproteobacteria	Methylophilales	Methylophilaceae	OM43 clade	uncultured bacterium
a7131863722fb99a44ad1ff828841cce	Bacteria	Proteobacteria	Gammaproteobacteria	Alteromonadales	Alteromonadaceae	Pseudohaliea	uncultured organism
60da738bc4b046c5c5c7b22f77832a90	Bacteria	Bacteroidetes	Flavobacteriia	Flavobacteriales	Flavobacteriaceae	NS2b marine group	uncultured bacterium
5ad17765042508eef4eda51d9a436798	Bacteria	Planctomycetes	Planctomycetacia	Planctomycetales	Planctomycetaceae	Rhodopirellula	uncultured planctomycete
b0f1c809f894546e3633553f475ae34b	Bacteria	Proteobacteria	Gammaproteobacteria
984e495a4665e7d78ca8166b19d1377c	Bacteria	Bacteroidetes
187566145fbeed598c7fa7e1d0f56893	Bacteria	Proteobacteria	Betaproteobacteria
0b68f9e6ef34fe8a5450a6152203bf8f	Bacteria	Planctomycetes	Planctomycetacia	Planctomycetales	Planctomycetaceae	Blastopirellula
e4db4b69f4dcb92e21a950f284ec8b75	Bacteria
61ab824b63756fa52f4adc38774d9cfd	Bacteria	Bacteroidetes	Sphingobacteriia	Sphingobacteriales	Saprospiraceae	Aureispira	uncultured bacterium
d326168fdf6ef6133f3de28b021dcb0b	Bacteria	Cyanobacteria	Cyanobacteria	SubsectionI	FamilyI	uncultured bacterium
b5848cabc686e67ab6aa10d32efcb8e9	Bacteria	Verrucomicrobia	Verrucomicrobiae	Verrucomicrobiales	DEV007
083eae3a5a585b309751293eb3311536	Bacteria	Bacteroidetes	Cytophagia	Cytophagales	Flammeovirgaceae	Marinoscillum	uncultured organism
88e6f82436084085cc315124858fcceb	Bacteria	Bacteroidetes	Flavobacteriia	Flavobacteriales	Flavobacteriaceae
e39b0a8cf183344fae62c2e14a46a910	Bacteria	Planctomycetes	OM190	uncultured planctomycete
bd846af2fecac1a6d4c6feb5a79c19d6	Bacteria	Bacteroidetes	Flavobacteriia	Flavobacteriales
12773f14408f7fb7bc3e796d1d8c3dc8	Bacteria	Proteobacteria	TA18
9f3933039d989e97c9cddf12486db235	Bacteria	Proteobacteria	Alphaproteobacteria	Rickettsiales	SAR116 clade	uncultured alpha proteobacterium
381f36bbd09e72900376bd1ed54e05c2	Bacteria	Planctomycetes	Planctomycetacia	Planctomycetales	Planctomycetaceae	Planctomyces	uncultured planctomycete
a1b142fedb3b6f7871cfaa1dd243b9df	Bacteria	Bacteroidetes	Cytophagia	Order II	Rhodothermaceae	uncultured
2c914ca6839f67afcfecf21668190d7e	Bacteria	Verrucomicrobia	OPB35 soil group
9b03b9f9eb72fe49be3d2e4ee544f849	Archaea	Euryarchaeota	Thermoplasmata	Thermoplasmatales	Marine Group II
801b3393e0a3890bcce4fa4681e31ea9	Bacteria	Bacteroidetes	Flavobacteriia	Flavobacteriales	Cryomorphaceae	Owenweeksia	uncultured marine bacterium
8299aadd889b6ed7e5ca688053e8acb5	Bacteria
265f93f99468f9605a5031488c920eb1	Bacteria	Proteobacteria	Alphaproteobacteria	OCS116 clade	uncultured bacterium
c18bd0787bd84a93c473471149194808	Bacteria	Proteobacteria	Gammaproteobacteria	Alteromonadales	Pseudoalteromonadaceae	Pseudoalteromonas
b05e18c010a05f433e936ddcdf1552f1	Bacteria	Bacteroidetes	Flavobacteriia	Flavobacteriales	Flavobacteriaceae	NS5 marine group
abbf13c07c322c8416d7e133826045a9	Bacteria	Bacteroidetes	Cytophagia	Cytophagales	Cytophagaceae	Emticicia	uncultured bacterium
0a7cff6daea23145cea146dfb78df6df	Archaea	Euryarchaeota	Thermoplasmata	Thermoplasmatales	Marine Group II	uncultured marine archaeon
40bf00265bf20c9f34f9af6ac00ff409	Bacteria	Proteobacteria	Deltaproteobacteria	Desulfobacterales	Desulfobacteraceae	Desulfobacula	uncultured bacterium
89e41c4a3ce2b78243d6b03a7172ed82	Bacteria
7233e4cdaface6927d43773c964f94e4	Bacteria	Verrucomicrobia	Opitutae	Puniceicoccales	Puniceicoccaceae
5ef4fb5b128c84756275682b22f171bf	Bacteria	Tenericutes	Mollicutes	Mycoplasmatales	Mycoplasmataceae	Mycoplasma
84e422b114928ef1d913b13075ca5903	Bacteria	Proteobacteria	Gammaproteobacteria	Oceanospirillales	SAR86 clade
e24da0e4768c5139e07508128c265d02	Bacteria	Proteobacteria	Gammaproteobacteria	Oceanospirillales	Oceanospirillaceae	Neptuniibacter	uncultured bacterium
7d190b7fd6c0dfc9852826549d2bb171	Archaea	Thaumarchaeota	Marine Group I	Unknown Order	Unknown Family	Candidatus Nitrosopumilus
2fad69fe22cf51d5db90f9809e850883	Archaea	Euryarchaeota
6a201b5115fdc5fe6f6b96158a1c3678	Archaea	Euryarchaeota	Halobacteria	Halobacteriales	Deep Sea Hydrothermal Vent Gp 6(DHVEG-6)	uncultured euryarchaeote
5fcfba3a214cf2a4f4b4b3a9423bee76	Bacteria	Planctomycetes	Planctomycetacia	Planctomycetales	Planctomycetaceae	Planctomyces
c7daddda18ac2c23b82515b744a7c5c3	Bacteria	Bacteroidetes	Cytophagia	Cytophagales	Flammeovirgaceae	uncultured	uncultured Flexibacteraceae bacterium
736281d70ec672edc46ef1986b47e1a9	Bacteria	Bacteroidetes	Flavobacteriia	Flavobacteriales	Flavobacteriaceae	Winogradskyella	uncultured bacterium
f10a0d2ed1e44e121c68da8bcdcd8108	Bacteria	Proteobacteria	Alphaproteobacteria	Caulobacterales	Hyphomonadaceae	uncultured	uncultured organism
e3b00cd89c2ac0fa19d3e2a79209c750	Bacteria	Proteobacteria	Gammaproteobacteria
baaac2b84af41b8a30bd36a3ce0afdf6	Bacteria	Proteobacteria
4819e8a06d5d9c28790f1793f527dfda	Bacteria	Bacteroidetes	Flavobacteriia	Flavobacteriales	Flavobacteriaceae	NS4 marine group	uncultured bacterium
9c94712b0ac128883aeed3cf0cd696c7	Bacteria	Bacteroidetes	Flavobacteriia	Flavobacteriales	NS7 marine group	uncultured bacterium
6f70472a37bc090d135fd6a3cb14823f	Bacteria	Proteobacteria	Gammaproteobacteria	Oceanospirillales	SAR86 clade
47824b893c1f3ce6f4668404d7bf0029	Bacteria	Proteobacteria	Gammaproteobacteria
c0086f50c449526558dcbb7fd569043f	Bacteria	Proteobacteria	Deltaproteobacteria	Bdellovibrionales	Bdellovibrionaceae	OM27 clade	uncultured bacterium
b7d5ddba72a6a48439d5581e4ad9f425	Bacteria	Proteobacteria	Gammaproteobacteria	Vibrionales	Vibrionaceae	Vibrio
9f8142e4d37d7ced625d5d94d361b249	Bacteria	Bacteroidetes	Flavobacteriia	Flavobacteriales	Flavobacteriaceae
b304e39a3a19e64aca096f29b6360682	Bacteria	Planctomycetes	Planctomycetacia	Planctomycetales	Planctomycetaceae	Rhodopirellula	uncultured planctomycete
a73f97b94d85b164d70e228b442fd480	Bacteria	Proteobacteria	Alphaproteobacteria	Rhodobacterales	Rhodobacteraceae
a1ab6646e76ad306489747eac6e75d56	Bacteria	Proteobacteria	Epsilonproteobacteria	Campylobacterales	Campylobacteraceae	Arcobacter
3b3bbab9ab17d53dd61ce47bd1aef746	Bacteria	Proteobacteria	Alphaproteobacteria	Rickettsiales	SAR116 clade
441b997bec002a7fe05e0ad7e4bfc14e	Bacteria	Proteobacteria	Deltaproteobacteria	SAR324 clade(Marine group B)	uncultured bacterium
092eca9cd442d861a0923e8ff485bfe1	Bacteria	Planctomycetes	Phycisphaerae	Phycisphaerales	Phycisphaeraceae	CL500-3	uncultured bacterium
89f40f2cb797e9fdf5984815ddc20041	Bacteria	Bacteroidetes	Flavobacteriia	Flavobacteriales	Cryomorphaceae	Owenweeksia
651fcab6b218f4340e280b5d0dc6907d	Bacteria	Spirochaetae	Spirochaetes	Spirochaetales	Leptospiraceae	Leptospira	uncultured bacterium
1b80f1c6140743144b9e8affcdd07364	Bacteria	Proteobacteria	Gammaproteobacteria	Oceanospirillales	Oceanospirillaceae	Pseudospirillum
d8a4b750f0e6e03984a422ddca7a730f	Archaea	Thaumarchaeota	Marine Group I	Unknown Order	Unknown Family	Candidatus Nitrosopumilus	uncultured archaeon
6a74c8db57dae19e9886e06c29f4a02b	Bacteria	Proteobacteria	Alphaproteobacteria	Caulobacterales	Hyphomonadaceae	Maricaulis	uncultured bacterium
5a1119a2248d37cbeb48e87669216058	Bacteria	Proteobacteria	Gammaproteobacteria	Order Incertae Sedis	Family Incertae Sedis	Marinicella
a1219c3e384b263c96f09ff1f1cea107	Bacteria	Proteobacteria	Alphaproteobacteria	SAR11 clade	Surface 1
5fdd283d6c23ad4ffe4c193be7dd8777	Bacteria	Proteobacteria	Deltaproteobacteria	Desulfobacterales	Desulfobacteraceae	uncultured	uncultured delta proteobacterium
c1a06ec4b61a8bfe17718e877304704c	Bacteria	Proteobacteria	Gammaproteobacteria	Alteromonadales	Alteromonadaceae
9057809acd10e3b7176e8e2e171a5560	Bacteria
79770a9e00b2c4e42d96b35e3d2e78f4	Bacteria	Bacteroidetes	SB-1
b526aff53fb6891ec8b6d8badfbadc55	Bacteria	Bacteroidetes	Flavobacteriia	Flavobacteriales	Flavobacteriaceae	Zeaxanthinibacter	uncultured bacterium
8bb8eb47069b3e919959aa111ba859ec	Bacteria	Proteobacteria	Deltaproteobacteria
8080b535f4bf339a8d5fee285ddab60b	Bacteria	Proteobacteria	Deltaproteobacteria	Bdellovibrionales	Bacteriovoracaceae	Peredibacter
cb2fe0146e2fbcb101050edb996a0ee2	Bacteria	Firmicutes	Bacilli	Bacillales	Staphylococcaceae	Staphylococcus
0987cab7d3c57f1ee946d64a9328b8ac	Bacteria	Proteobacteria	Gammaproteobacteria	Chromatiales	Granulosicoccaceae	Granulosicoccus	uncultured bacterium
65d24cb700a481a668a269cc4d4c0258	Bacteria	Verrucomicrobia	OPB35 soil group	bacterium SH5-3
fa333945848cb7d55d02e6ab8113ef61	Bacteria	Bacteroidetes	Sphingobacteriia	Sphingobacteriales	Saprospiraceae
65e35421014f4a59d70a878421ef6b64	Bacteria	Proteobacteria	Alphaproteobacteria
80594c43870dc4de9006c141e4586f32	Bacteria
6916d97494489296801671b8d18a0309	Bacteria	Bacteroidetes	Flavobacteriia	Flavobacteriales	Flavobacteriaceae	NS4 marine group	uncultured bacterium
5f1e11b766b8b422db0c1f28549d2c34	Bacteria	Bacteroidetes	Sphingobacteriia	Sphingobacteriales	Saprospiraceae	uncultured	unidentified marine eubacterium
781658c5e0d0781fec4d34bd04d50fac	Bacteria	Bacteroidetes	Sphingobacteriia	Sphingobacteriales	Saprospiraceae	uncultured	uncultured bacterium
13139197c71943b350a1cb469ffa0ad0	Bacteria	Bacteroidetes	Sphingobacteriia	Sphingobacteriales	Saprospiraceae
1ee005c996bdb650a61b92c20237878b	Bacteria	Proteobacteria	Gammaproteobacteria
eb63b799d3c4037796161ba48a0a1f56	Bacteria	Proteobacteria	Betaproteobacteria
d020b09ed91b217cd152a0de84a1667b	Bacteria	Proteobacteria	Gammaproteobacteria	Alteromonadales	Alteromonadaceae	OM60(NOR5) clade
422efbd87a37e2b1e7b7fa621cc99374	Bacteria	Proteobacteria	Gammaproteobacteria	Alteromonadales	Alteromonadaceae
8c94068ff0e9f6a4c567adae946a36a1	Bacteria	Bacteroidetes	Bacteroidia	Bacteroidales	Marinilabiaceae	uncultured	uncultured organism
05ee809c46ccca3097f50d1123609e5a	Bacteria	Bacteroidetes
4a3013159dc1750ef8329b06d6ae03fa	Bacteria	Proteobacteria	Deltaproteobacteria	Desulfuromonadales	GR-WP33-58
53f106106d2d64f757ac71843f1abfd4	Bacteria	Proteobacteria	Alphaproteobacteria	Rickettsiales	SAR116 clade	uncultured Oceanibaculum sp.
92f0d494390d4f67df6c3c3da28485ac	Bacteria
f02b676b1ba9d5d66f867e3a02439851	Bacteria	Chloroflexi	Caldilineae	Caldilineales	Caldilineaceae	uncultured
632ce91e3d8ea159bb80bef24e6e26e3	Bacteria	Proteobacteria	Deltaproteobacteria
da17572657f5636c66a5ce8c2d04922f	Bacteria	Proteobacteria	Alphaproteobacteria	Rickettsiales	SAR116 clade	uncultured Oceanibaculum sp.
1d751d87d5ee5fee259d09dc479fba93	Bacteria	Planctomycetes	BD7-11	uncultured planctomycete
3777b1ebf5dfb3e8f41d03e99c965213	Bacteria	Bacteroidetes	Flavobacteriia	Flavobacteriales	Flavobacteriaceae
b34fb0904caa8c1db6df0f5cb24da6b2	Bacteria	Proteobacteria	Gammaproteobacteria	Alteromonadales	Alteromonadaceae	OM60(NOR5) clade
a0ebaeab747dbf0fb40ca106f072d805	Bacteria	Fusobacteria	Fusobacteriia	Fusobacteriales
f77e657f16617d6eefe6c409ead568e8	Bacteria	Proteobacteria	Gammaproteobacteria
94e10c92d744617d9880b78eef11a2c6	Bacteria
7eab0a327e61cde847742596712dcadb	Bacteria	Proteobacteria	Gammaproteobacteria	Alteromonadales	Alteromonadaceae	OM60(NOR5) clade	uncultured bacterium
35eb7131a477d57ea2a7a3054080b025	Bacteria
10a0616a1ba9f2e05f568691c634744d	Bacteria	Bacteroidetes	Flavobacteriia	Flavobacteriales	Flavobacteriaceae	NS4 marine group
5acae2ebbfebc88e3a28ece5319fe6a2	Bacteria	Proteobacteria	Gammaproteobacteria	KI89A clade	uncultured bacterium
6f2548da34731900e68ee1bbeed4a579	Bacteria	Bacteroidetes	Flavobacteriia	Flavobacteriales	Flavobacteriaceae	uncultured
12f1be49b221158b70de13c4b79d93b8	Bacteria	Proteobacteria	Gammaproteobacteria	Oceanospirillales	Oceanospirillaceae	Marinobacterium	uncultured bacterium
d9fda2362a2fcb2bec7088a79d2c5c45	Bacteria
b35b9197c56e946f434f1503cf8251d1	Bacteria	Proteobacteria	Gammaproteobacteria
0ab1e846bf28637a8bce2109a4546ded	Bacteria	Proteobacteria	Deltaproteobacteria	Desulfuromonadales	GR-WP33-58	uncultured bacterium
8b01681576a3715537b6e2a71354b74b	Bacteria	Proteobacteria	Gammaproteobacteria	Alteromonadales	Alteromonadaceae	Haliea
c7f8f0fbe7bf7c181bcede842f9e9da2	Bacteria	Bacteroidetes
dff13ffbe943ba8c248432b01cf36665	Bacteria	Proteobacteria	Alphaproteobacteria	Rhodobacterales	Rhodobacteraceae	Shimia	uncultured bacterium
0e17c2c7eab35099465e8d4b48d8afd8	Bacteria	Bacteroidetes	Cytophagia	Cytophagales	Flammeovirgaceae	Reichenbachiella	uncultured bacterium
ac2206af4cf0945d2b011c64ce0561ab	Bacteria	Bacteroidetes	Cytophagia	Order III
5af4d0b719e8f09700615a4a5637235b	Bacteria	Bacteroidetes	Flavobacteriia	Flavobacteriales
874fd981a3848da5b64d2a21d0d284d0	Bacteria	Proteobacteria
7ea951ea8bf5b52389ac78570e3719e4	Bacteria	Bacteroidetes	Sphingobacteriia	Sphingobacteriales	Saprospiraceae	Aureispira	uncultured bacterium
ee523377a5b807db3a29f3c96e006658	Bacteria	Bacteroidetes	Sphingobacteriia	Sphingobacteriales	Saprospiraceae
773e03075b8b37b2f763b68a8b0ada1f	Bacteria	Proteobacteria	Gammaproteobacteria	Alteromonadales	Alteromonadaceae	BD1-7 clade	uncultured gamma proteobacterium
afb6e3462c149e3680faba8e89d0a007	Bacteria	Verrucomicrobia	Verrucomicrobiae	Verrucomicrobiales	Verrucomicrobiaceae	Persicirhabdus	uncultured bacterium
8a13f20e0e4548413b745bf51c9980b3	Bacteria	Tenericutes	Mollicutes	Acholeplasmatales	Acholeplasmataceae	Acholeplasma	uncultured Mollicutes bacterium
c6911e1ac67555f4a10f39df29c35a82	Bacteria	Bacteroidetes	Flavobacteriia	Flavobacteriales
1ee948b5ef1c4af93bce919fe1350f59	Bacteria	Proteobacteria	Betaproteobacteria	Burkholderiales	Alcaligenaceae	MWH-UniP1 aquatic group	uncultured bacterium
a26e3b9d9182d3071de0d7e27d7281cb	Bacteria	Bacteroidetes	Bacteroidia	Bacteroidales
c22273f574a6358a8544884020f7a822	Bacteria	Bacteroidetes	Sphingobacteriia	Sphingobacteriales	Chitinophagaceae	uncultured	uncultured organism
c46dd37b19afc79e3d58421cfc7611f8	Bacteria	Proteobacteria	Gammaproteobacteria	Thiotrichales	Piscirickettsiaceae	Thiomicrospira
c8583ffc493e6da2028670a01931b6a7	Bacteria	Bacteroidetes	Flavobacteriia	Flavobacteriales
42fae23e175bfe373e96584c6168bd00	Bacteria	Verrucomicrobia	Opitutae	Opitutales	Opitutaceae	Diplosphaera	uncultured bacterium
0f6006dc9edddee73c4e03a918c3aa66	Bacteria	Proteobacteria	Alphaproteobacteria	Rhodobacterales	Rhodobacteraceae
0cc64f34d1707e80750a74f8184c0a1f	Bacteria	Proteobacteria	Alphaproteobacteria	Rickettsiales	SAR116 clade
7e857ab7033d8eae6b29d820ef13ebb5	Bacteria	Cyanobacteria	Cyanobacteria	SubsectionI	FamilyI	Synechococcus	uncultured bacterium
c3ad82cf4aca35a9f2f7fef5d0a8d6ee	Bacteria	Proteobacteria	Gammaproteobacteria	Alteromonadales	Alteromonadaceae	OM60(NOR5) clade
5de2a036f0f139951d85a2de5c60621b	Bacteria	Proteobacteria	Gammaproteobacteria	Alteromonadales	Alteromonadaceae
c3b62664bd1a4c55ed9dcd8c92b33583	Bacteria	Proteobacteria	Gammaproteobacteria	KI89A clade	uncultured bacterium
59702671fe9c6d0fafd8225d1f68bd1f	Bacteria
821deee071d3418b79af5357f8e7842c	Bacteria	Proteobacteria	Alphaproteobacteria	OCS116 clade	uncultured bacterium
dffe8a7b6f5c4f32a70cf6caa6c988c8	Bacteria
73e5cabac95eef4803b5a9ef878bb288	Unassigned
82c9e178eb04788207c4d1da199ee71b	Bacteria	Verrucomicrobia	Opitutae	Puniceicoccales	Puniceicoccaceae	Pelagicoccus	uncultured bacterium
f6608e71c06674d8840e9cb8ccb2e74d	Bacteria	Bacteroidetes	Flavobacteriia	Flavobacteriales	Flavobacteriaceae	NS4 marine group	uncultured bacterium
9d0aa0ae6cb02f9c5aa2b8394c175374	Bacteria	Proteobacteria	Deltaproteobacteria	Bdellovibrionales	Bdellovibrionaceae	OM27 clade	uncultured bacterium
10789246fe1db212417675b819bfc1ea	Bacteria	Proteobacteria	Gammaproteobacteria	Oceanospirillales	Oceanospirillaceae
bc8f87d0830d2296946ec4b282efd9eb	Bacteria	Planctomycetes	BD7-11	uncultured planctomycete
6c023e9343b47a238e838967a5fc3ae7	Bacteria	Proteobacteria	Gammaproteobacteria	Oceanospirillales	Oleiphilaceae	Oleiphilus	uncultured gamma proteobacterium
8b5f3cdf659d92004148926b5c0aa0f6	Bacteria
9d06b0d34aee5c599052cd8e6938a29d	Bacteria	Proteobacteria
9b1e92389ef0cc5317353e8ea8426a70	Bacteria	Proteobacteria	Alphaproteobacteria	OCS116 clade	uncultured alpha proteobacterium
0ccf4e896cf2dd21421ed53b04264399	Bacteria	Proteobacteria	Gammaproteobacteria	Chromatiales	Ectothiorhodospiraceae	Acidiferrobacter
7f85a233b7b2fbdbc690071d4e017f4d	Bacteria	Proteobacteria	Gammaproteobacteria	Thiotrichales	Thiotrichaceae	Candidatus Marithrix
f840cf2727ada22340eca35485241be7	Bacteria	Proteobacteria	Gammaproteobacteria	Alteromonadales	Alteromonadaceae	Aestuariibacter	uncultured bacterium
22de55f19b9739b7daa0e448bad17f34	Bacteria
146d84ad42b8ce4a5d91254f684ffa5c	Bacteria	Proteobacteria	Alphaproteobacteria	Rhodospirillales	Rhodospirillaceae	uncultured
d7685dd1542c6ffa71366be95c730169	Bacteria	Bacteroidetes	Sphingobacteriia	Sphingobacteriales	Chitinophagaceae	uncultured	uncultured organism
b991efbddcb23a9ce7cf362a9a85f7dd	Bacteria	Bacteroidetes	Flavobacteriia	Flavobacteriales	Flavobacteriaceae	NS4 marine group	uncultured bacterium
c43f03619843e2c11a74d05b2bc5e950	Bacteria	Proteobacteria	Deltaproteobacteria	Myxococcales	0319-6G20	uncultured proteobacterium
51a72f03122e0cd0cbb187a86303ebba	Bacteria	Proteobacteria	Gammaproteobacteria
f6264c5aaa7a9b9105a0ec0f9d26c608	Bacteria	Cyanobacteria
241c1ae15f05062ec51c3e47c71ac8dd	Bacteria	Proteobacteria	Gammaproteobacteria	Oceanospirillales	Oceanospirillaceae	Balneatrix	uncultured bacterium
0abe519a9a8a45aa86cceaf9f3c33f05	Bacteria	Proteobacteria	Gammaproteobacteria	Oceanospirillales	SAR86 clade
4249fd2566082cf83c642913383ca0e2	Bacteria	Proteobacteria	Gammaproteobacteria	Alteromonadales	Alteromonadaceae	uncultured
f7d86c8f4aed4693cbdb2dfc950cc9ad	Bacteria	Planctomycetes	Planctomycetacia	Planctomycetales	Planctomycetaceae	uncultured	uncultured planctomycete
6c89b6abb74ada812bfc48146dff607e	Bacteria	Proteobacteria	Gammaproteobacteria	Thiotrichales	Piscirickettsiaceae	endosymbionts
43c3c256bd8794b0fe6759e17e93f37d	Bacteria	Bacteroidetes
ea7322d93f224efaf467d9b2a120ee73	Bacteria	Proteobacteria	Alphaproteobacteria	Rhodobacterales	Rhodobacteraceae
0dbf819b7d532127bd721755e36eef2e	Unassigned
6318f64b4ea8870121e34d3b5b332189	Bacteria	Proteobacteria	Deltaproteobacteria
06c4da6859980f19124f84f1a07cf264	Bacteria	Proteobacteria	Deltaproteobacteria	Bdellovibrionales	Bacteriovoracaceae
416c2d057afa011278e4072aa985db0a	Bacteria	Proteobacteria	Alphaproteobacteria	Rhizobiales	Rhodobiaceae	Rhodobium	uncultured alpha proteobacterium
0e1e391fb89af1027466eef69818572e	Bacteria	Proteobacteria	Gammaproteobacteria	Order Incertae Sedis	Family Incertae Sedis	Marinicella
4852cbe862588a283f48b0ed45b51a3d	Bacteria	Verrucomicrobia	Verrucomicrobiae	Verrucomicrobiales
5276cabe0627995ba153913d7f591bb6	Bacteria	Proteobacteria	Gammaproteobacteria	Vibrionales	Vibrionaceae	Vibrio
c8d1e36cf0bc1f33faf48ef2b3a2cf41	Bacteria	Bacteroidetes	Flavobacteriia	Flavobacteriales	NS9 marine group
b9c94fb812e22b97b7af9c94291f7c4b	Bacteria	Bacteroidetes	Flavobacteriia	Flavobacteriales	Flavobacteriaceae	NS5 marine group	uncultured bacterium
27153535b92b8bd0d59aeee8456e91ca	Bacteria	Bacteroidetes	Sphingobacteriia	Sphingobacteriales	NS11-12 marine group
fdd47a63e2644a22a6ba99b78950fab4	Bacteria
c555ca09ca9ab129b41e18b7365cf94a	Bacteria	Proteobacteria	Deltaproteobacteria
[truncated: 432 more rows]

## Sheet: S8-MINE-corncob
Table S8: SVs both significantly associated with K. brevis based on the maximal information-based nonparametric exploration analysis and significantly enriched under high or low bloom conditions in the small and intermediate size fractions according to results of the beta-binomial modeling.
[truncated: 55 more rows]

[truncated: 1 more sheets: S9-sCCA]
